# Supplementary material for: Caveolae respond to acute oxidative stress through membrane lipid peroxidation, cytosolic release of CAVIN1, and downstream regulation of NRF2
Source: Research Square preprint supplement (doi:10.21203/rs.3.rs-963423/v1), 2021-10-22
Supplement: Supplementary file 2 [file 4497151f4fb8e5b1d2e5162a.xlsx]

## Sheet: Upregulated pathways
Pathway identifier	Pathway name	#Entities found	#Entities total	Entities ratio	Entities pValue	Entities FDR	#Reactions found	#Reactions total	Reactions ratio	Species identifier	Species name	Submitted entities found	Mapped entities	Found reaction identifiers
R-HSA-72649	Translation initiation complex formation	27	63	0.00450547	1.11e-16	3.26e-14	2	2	0.00017	9606	Homo sapiens	EIF4A1;RPS18;RPS3;EIF4H;EIF4B;RPS12;EIF2A;EIF1AX;RPSA;EIF2S1;RPS25;EIF3M;EIF2S3;EIF3K;EIF3L;EIF3I;EIF3J;EIF3G;EIF3H;RPS20;EIF3E;EIF3F;EIF3C;EIF3D;RPS21;EIF3A;EIF3B;EIF4G1		R-HSA-156808;R-HSA-157849
R-HSA-72702	Ribosomal scanning and start codon recognition	28	66	0.00472002	1.11e-16	3.26e-14	2	2	0.00017	9606	Homo sapiens	EIF4A1;RPS18;RPS3;EIF4H;EIF4B;RPS12;EIF2A;EIF1AX;RPSA;EIF2S1;RPS25;EIF3M;EIF2S3;EIF5;EIF3K;EIF3L;EIF3I;EIF3J;EIF3G;EIF3H;RPS20;EIF3E;EIF3F;EIF3C;EIF3D;RPS21;EIF3A;EIF3B;EIF4G1		R-HSA-72697;R-HSA-72621
R-HSA-72662	Activation of the mRNA upon binding of the cap-binding complex and eIFs, and subsequent binding to 43S	27	67	0.00479153	1.11e-16	3.26e-14	5	6	0.000509	9606	Homo sapiens	EIF4A1;RPS18;RPS3;EIF4H;EIF4B;RPS12;EIF2A;EIF1AX;RPSA;EIF2S1;RPS25;EIF3M;EIF2S3;EIF3K;EIF3L;EIF3I;EIF3J;EIF3G;EIF3H;RPS20;EIF3E;EIF3F;EIF3C;EIF3D;RPS21;EIF3A;EIF3B;EIF4G1		R-HSA-72647;R-HSA-72631;R-HSA-156808;R-HSA-72635;R-HSA-157849
R-HSA-72766	Translation	61	340	0.0243152	1.11e-16	3.26e-14	56	99	0.00839837	9606	Homo sapiens	CARS;EIF4A1;VARS;EPRS;NARS;EEF1B2;TRMT112;RPS18;RARS;RPL38;RPS12;EIF2A;EIF5B;WARS;EIF1AX;SARS;RPSA;EEF1G;KARS;PPA1;EEF1D;ETF1;EEF1E1;TARS;GSPT1;LARS;RPS3;EIF4H;EIF4B;YARS;EIF2B4;DARS;EIF2B2;EEF2;EIF2S1;AIMP1;AIMP2;RPS25;EIF3M;EIF2S3;EIF5;QARS;EIF3K;EIF3L;MARS;EIF3I;EIF3J;EIF3G;EIF3H;RPS20;EIF3E;IARS;EIF3F;FARSA;EIF3C;EIF3D;RPS21;EIF3A;EIF3B;EIF4G1;AARS		R-HSA-156930;R-HSA-1799326;R-HSA-156808;R-HSA-380042;R-HSA-72722;R-HSA-156823;R-HSA-156826;R-HSA-157849;R-HSA-72619;R-HSA-72621;R-HSA-71732;R-HSA-72631;R-HSA-1799330;R-HSA-1799329;R-HSA-72635;R-HSA-1799335;R-HSA-1799332;R-HSA-379974;R-HSA-72647;R-HSA-379980;R-HSA-379982;R-HSA-380233;R-HSA-379977;R-HSA-379848;R-HSA-379861;R-HSA-380241;R-HSA-72663;R-HSA-379996;R-HSA-379865;R-HSA-379993;R-HSA-72669;…
R-HSA-72695	Formation of the ternary complex, and subsequently, the 43S complex	23	54	0.00386183	4.44e-16	1.04e-13	3	3	0.000254	9606	Homo sapiens	EIF1AX;RPSA;EIF2S1;RPS25;EIF3M;EIF2S3;EIF3K;RPS18;EIF3L;EIF3I;EIF3J;RPS3;EIF3G;EIF3H;RPS20;EIF3E;EIF3F;EIF3C;EIF3D;RPS21;EIF3A;EIF3B;EIF2A;RPS12		R-HSA-72691;R-HSA-72663;R-HSA-72669
R-HSA-72737	Cap-dependent Translation Initiation	32	131	0.00936852	5.33e-15	8.95e-13	17	18	0.00152698	9606	Homo sapiens	EIF4A1;RPS18;RPS3;EIF4H;RPL38;EIF4B;RPS12;EIF2A;EIF2B4;EIF5B;EIF2B2;EIF1AX;RPSA;EIF2S1;RPS25;EIF3M;EIF2S3;EIF5;EIF3K;EIF3L;EIF3I;EIF3J;EIF3G;EIF3H;RPS20;EIF3E;EIF3F;EIF3C;EIF3D;RPS21;EIF3A;EIF3B;EIF4G1		R-HSA-72673;R-HSA-72672;R-HSA-72676;R-HSA-72647;R-HSA-72619;R-HSA-156808;R-HSA-72621;R-HSA-72691;R-HSA-72722;R-HSA-72663;R-HSA-72631;R-HSA-72697;R-HSA-72635;R-HSA-157849;R-HSA-72669;R-HSA-72671;R-HSA-72670
R-HSA-72613	Eukaryotic Translation Initiation	32	131	0.00936852	5.33e-15	8.95e-13	19	21	0.00178147	9606	Homo sapiens	EIF4A1;RPS18;RPS3;EIF4H;RPL38;EIF4B;RPS12;EIF2A;EIF2B4;EIF5B;EIF2B2;EIF1AX;RPSA;EIF2S1;RPS25;EIF3M;EIF2S3;EIF5;EIF3K;EIF3L;EIF3I;EIF3J;EIF3G;EIF3H;RPS20;EIF3E;EIF3F;EIF3C;EIF3D;RPS21;EIF3A;EIF3B;EIF4G1		R-HSA-72673;R-HSA-72672;R-HSA-72676;R-HSA-72647;R-HSA-72619;R-HSA-156808;R-HSA-72621;R-HSA-72691;R-HSA-72722;R-HSA-156823;R-HSA-72663;R-HSA-72631;R-HSA-72697;R-HSA-156826;R-HSA-72635;R-HSA-157849;R-HSA-72669;R-HSA-72671;R-HSA-72670
R-HSA-379716	Cytosolic tRNA aminoacylation	21	50	0.00357577	1.18e-14	1.73e-12	19	21	0.00178147	9606	Homo sapiens	CARS;YARS;DARS;WARS;VARS;SARS;TARS;EPRS;AIMP1;NARS;AIMP2;KARS;QARS;LARS;PPA1;MARS;RARS;IARS;FARSA;EEF1E1;AARS		R-HSA-379974;R-HSA-380002;R-HSA-379980;R-HSA-379887;R-HSA-379982;R-HSA-379977;R-HSA-380008;R-HSA-379848;R-HSA-380042;R-HSA-379893;R-HSA-379861;R-HSA-71732;R-HSA-379996;R-HSA-379865;R-HSA-379993;R-HSA-379864;R-HSA-379992;R-HSA-379867;R-HSA-379994
R-HSA-72706	GTP hydrolysis and joining of the 60S ribosomal subunit	30	122	0.00872488	3.2e-14	4.16e-12	3	3	0.000254	9606	Homo sapiens	EIF4A1;RPS18;RPS3;EIF4H;RPL38;EIF4B;RPS12;EIF2A;EIF5B;EIF1AX;RPSA;EIF2S1;RPS25;EIF3M;EIF2S3;EIF5;EIF3K;EIF3L;EIF3I;EIF3J;EIF3G;EIF3H;RPS20;EIF3E;EIF3F;EIF3C;EIF3D;RPS21;EIF3A;EIF3B;EIF4G1		R-HSA-72672;R-HSA-72619;R-HSA-72671
R-HSA-156827	L13a-mediated translational silencing of Ceruloplasmin expression	28	120	0.00858185	7.9e-13	9.24e-11	2	3	0.000254	9606	Homo sapiens	EIF4A1;RPS18;RPS3;EIF4H;RPL38;EIF4B;RPS12;EIF2A;EIF1AX;RPSA;EIF2S1;RPS25;EIF3M;EIF2S3;EIF3K;EIF3L;EIF3I;EIF3J;EIF3G;EIF3H;RPS20;EIF3E;EIF3F;EIF3C;EIF3D;RPS21;EIF3A;EIF3B;EIF4G1		R-HSA-156823;R-HSA-156826
R-HSA-379724	tRNA Aminoacylation	21	68	0.00486305	3.75e-12	4.02e-10	21	42	0.00356295	9606	Homo sapiens	CARS;YARS;DARS;WARS;VARS;SARS;TARS;EPRS;AIMP1;NARS;AIMP2;KARS;QARS;LARS;PPA1;MARS;RARS;IARS;FARSA;EEF1E1;AARS		R-HSA-379974;R-HSA-380002;R-HSA-379980;R-HSA-379887;R-HSA-379982;R-HSA-380233;R-HSA-379977;R-HSA-380008;R-HSA-379848;R-HSA-380042;R-HSA-379893;R-HSA-379861;R-HSA-380241;R-HSA-71732;R-HSA-379996;R-HSA-379865;R-HSA-379993;R-HSA-379864;R-HSA-379992;R-HSA-379867;R-HSA-379994
R-HSA-389957	Prefoldin mediated transfer of substrate to CCT/TriC	14	29	0.00207395	5.21e-11	5.1e-09	2	2	0.00017	9606	Homo sapiens	CCT6A;CCT3;CCT2;VBP1;TCP1;CCT8;TUBB4B;CCT7;PFDN5;TUBA4A;CCT5;CCT4		R-HSA-389970;R-HSA-389980
R-HSA-2408517	SeMet incorporation into proteins	11	15	0.00107273	8.14e-11	7.32e-09	1	1	8.48e-05	9606	Homo sapiens	AIMP1;AIMP2;DARS;KARS;QARS;LARS;RARS;MARS;IARS;EEF1E1;EPRS		R-HSA-2408546
R-HSA-389958	Cooperation of Prefoldin and TriC/CCT in actin and tubulin folding	15	37	0.00264607	1.17e-10	9.84e-09	6	6	0.000509	9606	Homo sapiens	CCT6A;CCT3;CCT2;VBP1;TCP1;CCT8;TUBB4B;CCT7;PFDN5;TUBA4A;CCT5;CCT4		R-HSA-390453;R-HSA-389970;R-HSA-389954;R-HSA-389980;R-HSA-389961;R-HSA-390459
R-HSA-68882	Mitotic Anaphase	33	208	0.0148752	1.79e-10	1.4e-08	8	11	0.000933	9606	Homo sapiens	PSMD11;MIS12;PMF1;PSMA7;PSMD8;XPO1;PSMB5;PSMD5;PPP2R1A;LMNA;PSMB1;WAPAL;BUB3;CLASP1;CLASP2;DYNC1H1;SEC13;NUDC;ANAPC7;RCC2;TUBB4B;CKAP5;TUBA4A;PSMA6;CENPF;PSMA4;KIF2A;PSMA2;MAPRE1;PAFAH1B1		R-HSA-2995388;R-HSA-174144;R-HSA-2467809;R-HSA-2545203;R-HSA-2467811;R-HSA-174202;R-HSA-174121;R-HSA-2995376
R-HSA-68886	M Phase	47	390	0.027891	2.43e-10	1.77e-08	41	66	0.00559891	9606	Homo sapiens	PSMD11;SET;NUMA1;DCTN2;DCTN1;MIS12;NCAPG;PMF1;PSMA7;NCAPH;PSMD8;XPO1;PSMB5;PSMD5;PPP2R1A;TPR;LMNA;PSMB1;WAPAL;BUB3;PRKACA;CLASP1;CLASP2;DYNC1H1;SEC13;NUDC;HSP90AA1;ANAPC7;RCC2;TUBB4B;TUBG1;CKAP5;TUBA4A;PSMA6;CENPF;PSMA4;KIF2A;PSMA2;CDK1;NCAPD2;MAPRE1;PAFAH1B1		R-HSA-2514854;R-HSA-2245218;R-HSA-174144;R-HSA-2545253;R-HSA-375302;R-HSA-2467809;R-HSA-5229194;R-HSA-5195402;R-HSA-2467811;R-HSA-2993898;R-HSA-5223304;R-HSA-156682;R-HSA-1638803;R-HSA-2990880;R-HSA-2990882;R-HSA-2995388;R-HSA-2529015;R-HSA-2545203;R-HSA-2520883;R-HSA-380316;R-HSA-380508;R-HSA-2468287;R-HSA-2529020;R-HSA-2995376;R-HSA-2468293;R-HSA-2430533;R-HSA-174121;R-HSA-2294600;R-HSA-2468040…
R-HSA-2555396	Mitotic Metaphase and Anaphase	33	211	0.0150898	2.56e-10	1.77e-08	8	12	0.00101798	9606	Homo sapiens	PSMD11;MIS12;PMF1;PSMA7;PSMD8;XPO1;PSMB5;PSMD5;PPP2R1A;LMNA;PSMB1;WAPAL;BUB3;CLASP1;CLASP2;DYNC1H1;SEC13;NUDC;ANAPC7;RCC2;TUBB4B;CKAP5;TUBA4A;PSMA6;CENPF;PSMA4;KIF2A;PSMA2;MAPRE1;PAFAH1B1		R-HSA-2995388;R-HSA-174144;R-HSA-2467809;R-HSA-2545203;R-HSA-2467811;R-HSA-174202;R-HSA-174121;R-HSA-2995376
R-HSA-2467813	Separation of Sister Chromatids	31	194	0.013874	5.44e-10	3.53e-08	6	8	0.000679	9606	Homo sapiens	PSMD11;MIS12;PMF1;PSMA7;PSMD8;XPO1;PSMB5;PSMD5;PPP2R1A;PSMB1;WAPAL;BUB3;CLASP1;CLASP2;DYNC1H1;SEC13;NUDC;ANAPC7;RCC2;TUBB4B;CKAP5;TUBA4A;PSMA6;CENPF;PSMA4;KIF2A;PSMA2;MAPRE1;PAFAH1B1		R-HSA-174144;R-HSA-2467809;R-HSA-2545203;R-HSA-2467811;R-HSA-174202;R-HSA-174121
R-HSA-68877	Mitotic Prometaphase	32	207	0.0148037	6.35e-10	3.87e-08	15	15	0.00127248	9606	Homo sapiens	NUMA1;DCTN2;DCTN1;MIS12;NCAPG;PMF1;NCAPH;XPO1;PPP2R1A;WAPAL;BUB3;PRKACA;CLASP1;CLASP2;DYNC1H1;SEC13;NUDC;HSP90AA1;RCC2;TUBB4B;TUBG1;CKAP5;TUBA4A;CENPF;KIF2A;CDK1;NCAPD2;MAPRE1;PAFAH1B1		R-HSA-2468293;R-HSA-2514854;R-HSA-2545253;R-HSA-375302;R-HSA-1638803;R-HSA-2466068;R-HSA-2529015;R-HSA-2484822;R-HSA-2520883;R-HSA-2467794;R-HSA-380316;R-HSA-380508;R-HSA-2468287;R-HSA-2529020;R-HSA-1638821
R-HSA-389960	Formation of tubulin folding intermediates by CCT/TriC	13	30	0.00214546	9.18e-10	5.33e-08	2	2	0.00017	9606	Homo sapiens	CCT6A;CCT3;CCT2;TCP1;CCT8;TUBB4B;CCT7;TUBA4A;CCT5;CCT4		R-HSA-389954;R-HSA-389961
R-HSA-69278	Cell Cycle, Mitotic	58	570	0.0407638	1.03e-09	5.76e-08	177	322	0.0273159	9606	Homo sapiens	FEN1;NUMA1;PSMD8;XPO1;PSMD5;PPP2R1A;WAPAL;PRKACA;SEC13;NUDC;HSP90AA1;ANAPC7;TUBG1;CKAP5;TUBA4A;PSMA6;PSMA4;KIF2A;PSMA2;MAPRE1;PAFAH1B1;PRIM2;PSMD11;SET;DCTN2;DCTN1;MIS12;NCAPG;TYMS;PMF1;NCAPH;PSMA7;PSMB5;POLD1;TPR;LMNA;PSMB1;BUB3;CLASP1;CLASP2;DYNC1H1;RCC2;RPA1;TUBB4B;CENPF;CDK2;POLE3;CDK1;NCAPD2		R-HSA-375302;R-HSA-8852354;R-HSA-8961934;R-HSA-69127;R-HSA-156682;R-HSA-8961920;R-HSA-174088;R-HSA-8852362;R-HSA-2990880;R-HSA-187916;R-HSA-2990882;R-HSA-2545203;R-HSA-69140;R-HSA-2520883;R-HSA-69142;R-HSA-69144;R-HSA-8853405;R-HSA-174104;R-HSA-174105;R-HSA-174110;R-HSA-187934;R-HSA-188191;R-HSA-69152;R-HSA-380455;R-HSA-187937;R-HSA-174119;R-HSA-174122;R-HSA-174120;R-HSA-174121;R-HSA-8853419;R-HS…
R-HSA-72689	Formation of a pool of free 40S subunits	22	106	0.00758063	1.88e-09	9.99e-08	2	2	0.00017	9606	Homo sapiens	EIF1AX;RPSA;RPS25;EIF3M;EIF3K;RPS18;EIF3L;EIF3I;EIF3J;RPS3;EIF3G;EIF3H;RPL38;RPS20;EIF3E;EIF3F;EIF3C;EIF3D;RPS21;EIF3A;EIF3B;RPS12		R-HSA-72673;R-HSA-72676
R-HSA-376176	Signaling by ROBO receptors	33	235	0.0168061	3.54e-09	1.8e-07	12	60	0.00508992	9606	Homo sapiens	PSMD11;GSPT1;PSMA7;PSMD8;PSMB5;RPS18;PSMD5;PSMB1;RPS3;DAG1;RPL38;PRKACA;PAK2;CLASP1;CLASP2;RPS12;UPF2;VASP;UPF3B;RPSA;ENAH;RPS25;PSMA6;PSMA4;PSMA2;RPS20;ETF1;PFN1;RPS21;EIF4G1		R-HSA-428534;R-HSA-9010681;R-HSA-9010872;R-HSA-428885;R-HSA-9014652;R-HSA-428531;R-HSA-9011313;R-HSA-9010641;R-HSA-376140;R-HSA-9010643;R-HSA-9014610;R-HSA-9010646
R-HSA-69275	G2/M Transition	31	212	0.0151613	4.24e-09	2.08e-07	44	78	0.0066169	9606	Homo sapiens	PSMD11;DCTN2;DCTN1;PSMA7;PSMD8;XPO1;PSMB5;PSMD5;PPP2R1A;PSMB1;PRKACA;CLASP1;DYNC1H1;HSP90AA1;TUBB4B;TUBG1;CKAP5;TUBA4A;PSMA6;CENPF;PSMA4;PSMA2;CDK2;CDK1;MAPRE1;PAFAH1B1		R-HSA-380294;R-HSA-8852354;R-HSA-170055;R-HSA-170116;R-HSA-4088441;R-HSA-4088439;R-HSA-380303;R-HSA-170057;R-HSA-170126;R-HSA-8852362;R-HSA-8852298;R-HSA-170131;R-HSA-3000319;R-HSA-380311;R-HSA-170070;R-HSA-8852306;R-HSA-2574845;R-HSA-8853405;R-HSA-170072;R-HSA-3000310;R-HSA-8854044;R-HSA-170076;R-HSA-2574840;R-HSA-380455;R-HSA-170087;R-HSA-170084;R-HSA-4088024;R-HSA-170088;R-HSA-170153;R-HSA-885…
R-HSA-453274	Mitotic G2-G2/M phases	31	214	0.0153043	5.25e-09	2.47e-07	46	80	0.00678656	9606	Homo sapiens	PSMD11;DCTN2;DCTN1;PSMA7;PSMD8;XPO1;PSMB5;PSMD5;PPP2R1A;PSMB1;PRKACA;CLASP1;DYNC1H1;HSP90AA1;TUBB4B;TUBG1;CKAP5;TUBA4A;PSMA6;CENPF;PSMA4;PSMA2;CDK2;CDK1;MAPRE1;PAFAH1B1		R-HSA-380294;R-HSA-8852354;R-HSA-170055;R-HSA-170116;R-HSA-4088441;R-HSA-4088439;R-HSA-380303;R-HSA-170057;R-HSA-170126;R-HSA-8852362;R-HSA-8852298;R-HSA-170131;R-HSA-3000319;R-HSA-380311;R-HSA-170070;R-HSA-8852306;R-HSA-2574845;R-HSA-8853405;R-HSA-170072;R-HSA-3000310;R-HSA-8854044;R-HSA-170076;R-HSA-2574840;R-HSA-380455;R-HSA-187937;R-HSA-170087;R-HSA-170084;R-HSA-4088024;R-HSA-170088;R-HSA-170…
R-HSA-390450	Folding of actin by CCT/TriC	9	13	0.00093	6.97e-09	3.14e-07	2	2	0.00017	9606	Homo sapiens	CCT6A;CCT3;CCT2;TCP1;CCT8;CCT7;CCT5;CCT4		R-HSA-390453;R-HSA-390459
R-HSA-392499	Metabolism of proteins	152	2342	0.167489	1.63e-08	7e-07	233	883	0.0749067	9606	Homo sapiens	CARS;EIF4A1;VARS;EPRS;NARS;EEF1B2;PSMD8;TFG;TRIM28;RPS18;PSMD5;KIF5B;KHSRP;DAG1;RPL38;RPS12;EIF2A;USP5;EIF1AX;SARS;RPSA;LMO7;TUBA4A;RNF40;KARS;PPA1;TTLL12;TLN1;COPA;PSMD11;TARS;TXN;GSPT1;COMMD9;LARS;TPR;TFAP2A;YARS;EIF2B4;DARS;EIF2B2;CBX5;SEC16A;ASNS;EEF2;EIF2S1;COPS4;AIMP1;CCT6A;AIMP2;RPS25;EIF2S3;EIF5;QARS;COPS2;GNB4;UBE2N;CDK1;UBA2;RPS20;UBA1;TPP1;ANP32B;IARS;FARSA;OGT;RPS21;COPE;RAD18;EIF4G1;…		R-HSA-8956040;R-HSA-8956045;R-HSA-8850560;R-HSA-72722;R-HSA-8852127;R-HSA-5665871;R-HSA-8956050;R-HSA-4551768;R-HSA-8852134;R-HSA-8852133;R-HSA-5689973;R-HSA-8852132;R-HSA-8852131;R-HSA-8852130;R-HSA-8852129;R-HSA-8852128;R-HSA-8852136;R-HSA-3000348;R-HSA-71732;R-HSA-5615637;R-HSA-8956106;R-HSA-379974;R-HSA-2993769;R-HSA-379980;R-HSA-379982;R-HSA-8956099;R-HSA-379977;R-HSA-8956103;R-HSA-2993790;R…
R-HSA-1640170	Cell Cycle	60	682	0.0487735	9.2e-08	3.86e-06	211	411	0.034866	9606	Homo sapiens	FEN1;NUMA1;PSMD8;XPO1;PSMD5;PPP2R1A;WAPAL;PRKACA;SEC13;NUDC;HSP90AA1;ANAPC7;TUBG1;CKAP5;TUBA4A;PSMA6;PSMA4;KIF2A;PSMA2;MAPRE1;PAFAH1B1;PRIM2;PSMD11;SET;DCTN2;DCTN1;MIS12;NCAPG;TYMS;PMF1;NCAPH;PSMA7;PSMB5;POLD1;TPR;LMNA;PSMB1;BUB3;CLASP1;CLASP2;DYNC1H1;RCC2;RPA1;TUBB4B;CENPF;CDK2;POLE3;CDK1;UBE2N;NCAPD2;TPP1		R-HSA-375302;R-HSA-69127;R-HSA-156682;R-HSA-174088;R-HSA-187916;R-HSA-2545203;R-HSA-69140;R-HSA-912408;R-HSA-69142;R-HSA-69144;R-HSA-174104;R-HSA-174105;R-HSA-174110;R-HSA-187934;R-HSA-912429;R-HSA-69152;R-HSA-380455;R-HSA-187937;R-HSA-174119;R-HSA-174122;R-HSA-174120;R-HSA-174121;R-HSA-176175;R-HSA-187948;R-HSA-187949;R-HSA-75825;R-HSA-2470935;R-HSA-187959;R-HSA-174132;R-HSA-174139;R-HSA-176702;…
R-HSA-2500257	Resolution of Sister Chromatid Cohesion	22	134	0.00958306	1.11e-07	4.44e-06	8	8	0.000679	9606	Homo sapiens	DYNC1H1;SEC13;NUDC;RCC2;MIS12;TUBB4B;CKAP5;PMF1;TUBA4A;CENPF;XPO1;KIF2A;PPP2R1A;CDK1;WAPAL;BUB3;MAPRE1;CLASP1;CLASP2;PAFAH1B1		R-HSA-2468293;R-HSA-2466068;R-HSA-2484822;R-HSA-2545253;R-HSA-2467794;R-HSA-1638803;R-HSA-2468287;R-HSA-1638821
R-HSA-450531	Regulation of mRNA stability by proteins that bind AU-rich elements	18	93	0.00665093	1.53e-07	5.73e-06	16	26	0.00220563	9606	Homo sapiens	SET;PSMD11;ANP32A;PSMA7;PSMD8;PSMA6;XPO1;PSMA4;PSMB5;PSMA2;PSMD5;KHSRP;PSMB1;PRKACA;TNPO1;DCP1A;HSPA1B;EIF4G1		R-HSA-450466;R-HSA-450499;R-HSA-450595;R-HSA-450592;R-HSA-450400;R-HSA-450422;R-HSA-450550;R-HSA-450551;R-HSA-450580;R-HSA-450387;R-HSA-451152;R-HSA-450431;R-HSA-450463;R-HSA-450620;R-HSA-450394;R-HSA-450488
R-HSA-8852276	The role of GTSE1 in G2/M progression after G2 checkpoint	17	83	0.00593578	1.55e-07	5.73e-06	5	10	0.000848	9606	Homo sapiens	HSP90AA1;PSMD11;TUBB4B;TUBA4A;PSMA7;PSMD8;PSMA6;PSMA4;PSMB5;PSMA2;PSMD5;PSMB1;CDK1;MAPRE1		R-HSA-8852354;R-HSA-8852306;R-HSA-8852362;R-HSA-8852298;R-HSA-8852280
R-HSA-3371568	Attenuation phase	13	47	0.00336122	1.65e-07	5.94e-06	4	5	0.000424	9606	Homo sapiens	DNAJB1;HSP90AA1;FKBP4;HSPA1B		R-HSA-3371554;R-HSA-5324617;R-HSA-5082369;R-HSA-5082384
R-HSA-8950505	Gene and protein expression by JAK-STAT signaling after Interleukin-12 stimulation	16	74	0.00529214	1.76e-07	6.15e-06	8	36	0.00305395	9606	Homo sapiens	GSTO1;CFL1;TCP1;TALDO1;MSN;MIF;PPIA;PAK2		R-HSA-8950328;R-HSA-8950218;R-HSA-8950732;R-HSA-8950718;R-HSA-8950190;R-HSA-8950367;R-HSA-8950175;R-HSA-8950581
R-HSA-380320	Recruitment of NuMA to mitotic centrosomes	18	97	0.00693699	2.8e-07	9.51e-06	2	2	0.00017	9606	Homo sapiens	DYNC1H1;HSP90AA1;DCTN2;NUMA1;DCTN1;TUBB4B;TUBG1;CKAP5;TUBA4A;PPP2R1A;CDK1;MAPRE1;PRKACA;CLASP1;PAFAH1B1		R-HSA-380316;R-HSA-380508
R-HSA-3371571	HSF1-dependent transactivation	14	59	0.00421941	3.45e-07	1.14e-05	6	8	0.000679	9606	Homo sapiens	DNAJB1;HSP90AA1;FKBP4;HSPA1B;MTOR		R-HSA-3371554;R-HSA-5324617;R-HSA-5082405;R-HSA-5082356;R-HSA-5082369;R-HSA-5082384
R-HSA-3371497	HSP90 chaperone cycle for steroid hormone receptors (SHR)	15	70	0.00500608	4.73e-07	1.51e-05	12	12	0.00101798	9606	Homo sapiens	DNAJA1;DNAJB1;STIP1;DYNC1H1;HSP90AA1;DCTN2;DCTN1;TUBB4B;FKBP4;HSPA1B;TUBA4A		R-HSA-5618085;R-HSA-5618080;R-HSA-3371590;R-HSA-5618099;R-HSA-5618098;R-HSA-5618093;R-HSA-5618110;R-HSA-3371503;R-HSA-5618105;R-HSA-5618073;R-HSA-3371422;R-HSA-5618107
R-HSA-380284	Loss of proteins required for interphase microtubule organization from the centrosome	15	71	0.00507759	5.63e-07	1.69e-05	3	3	0.000254	9606	Homo sapiens	DYNC1H1;HSP90AA1;DCTN2;DCTN1;TUBB4B;TUBG1;CKAP5;TUBA4A;PPP2R1A;CDK1;MAPRE1;PRKACA;CLASP1;PAFAH1B1		R-HSA-380294;R-HSA-380272;R-HSA-380303
R-HSA-380259	Loss of Nlp from mitotic centrosomes	15	71	0.00507759	5.63e-07	1.69e-05	2	2	0.00017	9606	Homo sapiens	DYNC1H1;HSP90AA1;DCTN2;DCTN1;TUBB4B;TUBG1;CKAP5;TUBA4A;PPP2R1A;CDK1;MAPRE1;PRKACA;CLASP1;PAFAH1B1		R-HSA-380272;R-HSA-380303
R-HSA-380270	Recruitment of mitotic centrosome proteins and complexes	16	81	0.00579275	5.71e-07	1.71e-05	3	3	0.000254	9606	Homo sapiens	DYNC1H1;HSP90AA1;DCTN2;DCTN1;TUBB4B;TUBG1;CKAP5;TUBA4A;PPP2R1A;CDK1;MAPRE1;PRKACA;CLASP1;PAFAH1B1		R-HSA-380311;R-HSA-380455;R-HSA-380283
R-HSA-5663220	RHO GTPases Activate Formins	22	149	0.0106558	6.42e-07	1.86e-05	13	27	0.00229047	9606	Homo sapiens	DYNC1H1;SEC13;NUDC;RCC2;MIS12;TUBB4B;CKAP5;PMF1;TUBA4A;DIAPH1;CENPF;XPO1;KIF2A;PPP2R1A;BUB3;MAPRE1;PFN1;CLASP1;CLASP2;PAFAH1B1		R-HSA-5666070;R-HSA-5665751;R-HSA-5666160;R-HSA-5666129;R-HSA-5665809;R-HSA-5666001;R-HSA-5665982;R-HSA-5665659;R-HSA-5666169;R-HSA-5665767;R-HSA-5665989;R-HSA-5665802;R-HSA-203070
R-HSA-380287	Centrosome maturation	16	83	0.00593578	7.81e-07	2.19e-05	6	6	0.000509	9606	Homo sapiens	DYNC1H1;HSP90AA1;DCTN2;DCTN1;TUBB4B;TUBG1;CKAP5;TUBA4A;PPP2R1A;CDK1;MAPRE1;PRKACA;CLASP1;PAFAH1B1		R-HSA-380311;R-HSA-380455;R-HSA-380294;R-HSA-380272;R-HSA-380303;R-HSA-380283
R-HSA-2262752	Cellular responses to stress	47	512	0.0366159	7.83e-07	2.19e-05	47	184	0.0156091	9606	Homo sapiens	PSMD11;DCTN2;DCTN1;TXN;PSMA7;PSMD8;PRDX2;STIP1;DNAJB1;PSMB5;BAG3;PSMD5;PRDX1;TPR;PSMB1;DYNC1H1;HSP90AA1;ANAPC7;HSPA4;TXNRD2;TXNRD1;RPA1;GPX8;TUBB4B;PRDX6;TUBA4A;MTOR;DNAJA1;PSMA6;PSMA4;DNAJC7;PSMA2;CDK2;TPP1;FKBP4;HSPA1B		R-HSA-3790137;R-HSA-3341296;R-HSA-5324632;R-HSA-3225851;R-HSA-3790130;R-HSA-3788725;R-HSA-5082369;R-HSA-5618073;R-HSA-3788724;R-HSA-3371518;R-HSA-3371554;R-HSA-4793819;R-HSA-3785711;R-HSA-3788705;R-HSA-5324617;R-HSA-3323050;R-HSA-5252041;R-HSA-3371503;R-HSA-187934;R-HSA-3788708;R-HSA-5082384;R-HSA-3697882;R-HSA-5251955;R-HSA-5082409;R-HSA-5618099;R-HSA-5251959;R-HSA-5618098;R-HSA-3343700;R-HSA-50…
R-HSA-8854518	AURKA Activation by TPX2	15	74	0.00529214	9.34e-07	2.52e-05	2	2	0.00017	9606	Homo sapiens	DYNC1H1;HSP90AA1;DCTN2;DCTN1;TUBB4B;TUBG1;CKAP5;TUBA4A;PPP2R1A;CDK1;MAPRE1;PRKACA;CLASP1;PAFAH1B1		R-HSA-8853405;R-HSA-8853419
R-HSA-422475	Axon guidance	51	583	0.0416935	1.05e-06	2.74e-05	107	297	0.0251951	9606	Homo sapiens	CNTNAP1;PSMD11;TRIO;LAMC1;GSPT1;PSMA7;PSMD8;PSMB5;RPS18;PSMD5;CFL1;PSMB1;RPS3;DAG1;FYN;RPL38;PRKACA;PAK2;PDLIM7;CLASP1;EPHB4;CLASP2;RPS12;UPF2;VASP;HSP90AA1;MAP2K2;MSN;UPF3B;RPSA;TUBB4B;TUBA4A;DNM2;ENAH;RPS25;PSMA6;PSMA4;PSMA2;RPS20;ETF1;TLN1;PFN1;RPS21;EIF4G1		R-HSA-3928633;R-HSA-3928632;R-HSA-3928639;R-HSA-3928627;R-HSA-3928625;R-HSA-3928624;R-HSA-3928631;R-HSA-3928628;R-HSA-3928617;R-HSA-3928623;R-HSA-3928610;R-HSA-3928608;R-HSA-3928615;R-HSA-3928614;R-HSA-3928612;R-HSA-3928602;R-HSA-3928601;R-HSA-3928600;R-HSA-418850;R-HSA-3928607;R-HSA-3928604;R-HSA-109862;R-HSA-3928595;R-HSA-3928594;R-HSA-3928592;R-HSA-418858;R-HSA-3928598;R-HSA-418856;R-HSA-39285…
R-HSA-9020591	Interleukin-12 signaling	16	85	0.00607881	1.06e-06	2.75e-05	8	56	0.00475059	9606	Homo sapiens	GSTO1;CFL1;TCP1;TALDO1;MSN;MIF;PPIA;PAK2		R-HSA-8950328;R-HSA-8950218;R-HSA-8950732;R-HSA-8950718;R-HSA-8950190;R-HSA-8950367;R-HSA-8950175;R-HSA-8950581
R-HSA-9010553	Regulation of expression of SLITs and ROBOs	24	183	0.0130873	1.57e-06	3.91e-05	4	20	0.00169664	9606	Homo sapiens	UPF2;PSMD11;UPF3B;RPSA;GSPT1;PSMA7;PSMD8;RPS25;PSMA6;PSMA4;PSMB5;RPS18;PSMA2;PSMD5;PSMB1;RPS3;DAG1;ETF1;RPL38;RPS20;RPS21;EIF4G1;RPS12		R-HSA-9010872;R-HSA-9014652;R-HSA-9011313;R-HSA-9014610
R-HSA-141444	Amplification of signal from unattached kinetochores via a MAD2 inhibitory signal	16	94	0.00672245	3.76e-06	9.02e-05	4	4	0.000339	9606	Homo sapiens	DYNC1H1;SEC13;NUDC;RCC2;MIS12;CKAP5;PMF1;CENPF;XPO1;KIF2A;PPP2R1A;BUB3;MAPRE1;CLASP1;CLASP2;PAFAH1B1		R-HSA-141409;R-HSA-141431;R-HSA-141422;R-HSA-141439
R-HSA-141424	Amplification of signal from the kinetochores	16	94	0.00672245	3.76e-06	9.02e-05	4	4	0.000339	9606	Homo sapiens	DYNC1H1;SEC13;NUDC;RCC2;MIS12;CKAP5;PMF1;CENPF;XPO1;KIF2A;PPP2R1A;BUB3;MAPRE1;CLASP1;CLASP2;PAFAH1B1		R-HSA-141409;R-HSA-141431;R-HSA-141422;R-HSA-141439
R-HSA-69620	Cell Cycle Checkpoints	30	279	0.0199528	4.37e-06	0.000105	22	57	0.00483543	9606	Homo sapiens	PSMD11;MIS12;PMF1;PSMA7;PSMD8;XPO1;PSMB5;PSMD5;PPP2R1A;PSMB1;BUB3;CLASP1;CLASP2;DYNC1H1;SEC13;NUDC;ANAPC7;RCC2;RPA1;CKAP5;PSMA6;CENPF;PSMA4;KIF2A;PSMA2;CDK2;UBE2N;CDK1;MAPRE1;PAFAH1B1		R-HSA-69600;R-HSA-5683735;R-HSA-69891;R-HSA-141409;R-HSA-6799332;R-HSA-8852354;R-HSA-170055;R-HSA-176101;R-HSA-176298;R-HSA-176264;R-HSA-141422;R-HSA-176175;R-HSA-141423;R-HSA-264458;R-HSA-170070;R-HSA-141431;R-HSA-176250;R-HSA-69562;R-HSA-176318;R-HSA-187934;R-HSA-141439;R-HSA-141437
R-HSA-447115	Interleukin-12 family signaling	16	97	0.00693699	5.54e-06	0.000127	8	114	0.00967085	9606	Homo sapiens	GSTO1;CFL1;TCP1;TALDO1;MSN;MIF;PPIA;PAK2		R-HSA-8950328;R-HSA-8950218;R-HSA-8950732;R-HSA-8950718;R-HSA-8950190;R-HSA-8950367;R-HSA-8950175;R-HSA-8950581
R-HSA-3371556	Cellular response to heat stress	19	133	0.00951155	5.84e-06	0.000134	18	29	0.00246013	9606	Homo sapiens	DNAJB1;HSP90AA1;DNAJC7;HSPA4;BAG3;TPR;RPA1;FKBP4;HSPA1B;MTOR		R-HSA-5251955;R-HSA-5082409;R-HSA-5251959;R-HSA-5082405;R-HSA-5324632;R-HSA-5333051;R-HSA-5082369;R-HSA-3371518;R-HSA-3371554;R-HSA-3371586;R-HSA-4793819;R-HSA-5251942;R-HSA-3371467;R-HSA-5324617;R-HSA-5252041;R-HSA-5082356;R-HSA-5082384;R-HSA-5252079
R-HSA-69618	Mitotic Spindle Checkpoint	17	110	0.00786669	6.61e-06	0.000145	6	7	0.000594	9606	Homo sapiens	DYNC1H1;SEC13;NUDC;ANAPC7;RCC2;MIS12;CKAP5;PMF1;CENPF;XPO1;KIF2A;PPP2R1A;BUB3;MAPRE1;CLASP1;CLASP2;PAFAH1B1		R-HSA-141409;R-HSA-141431;R-HSA-141422;R-HSA-141439;R-HSA-141423;R-HSA-141437
R-HSA-8856688	Golgi-to-ER retrograde transport	20	148	0.0105843	7.47e-06	0.000164	10	18	0.00152698	9606	Homo sapiens	DYNC1H1;COPA;DCTN2;DCTN1;GALNT1;KIF11;TUBB4B;KLC1;TUBA4A;ARCN1;KIF2A;KIF5B;COPG1;PAFAH1B3;COPE;PAFAH1B2;PAFAH1B1		R-HSA-8849350;R-HSA-6811412;R-HSA-8848484;R-HSA-8849348;R-HSA-6811427;R-HSA-6811426;R-HSA-6811423;R-HSA-6811418;R-HSA-6811417;R-HSA-8849353
R-HSA-390466	Chaperonin-mediated protein folding	16	100	0.00715154	8.05e-06	0.000169	18	19	0.00161181	9606	Homo sapiens	CCT3;CCT2;VBP1;TUBB4B;TUBA4A;CCT6A;TCP1;GNB4;CCT8;CCT7;PFDN5;CCT5;CCT4		R-HSA-6814119;R-HSA-8850534;R-HSA-390470;R-HSA-8850529;R-HSA-391266;R-HSA-389954;R-HSA-8850560;R-HSA-6814124;R-HSA-8850539;R-HSA-389961;R-HSA-6814121;R-HSA-6814120;R-HSA-390453;R-HSA-6814418;R-HSA-389970;R-HSA-8850527;R-HSA-389980;R-HSA-390459
R-HSA-162906	HIV Infection	28	260	0.018594	8.82e-06	0.000185	96	158	0.0134035	9606	Homo sapiens	FEN1;PSMD11;CCNT1;GTF2B;PSMA7;PSMD8;XPO1;PSMB5;PSMD5;TPR;PSMB1;FYN;NELFCD;PAK2;RANBP1;SUPT16H;PDCD6IP;SSRP1;GTF2F1;SUPT5H;CDK9;PSMA6;PSMA4;PSMA2;NMT1;TCEA1;PPIA		R-HSA-180739;R-HSA-8951690;R-HSA-182795;R-HSA-3159227;R-HSA-180622;R-HSA-167181;R-HSA-167191;R-HSA-164503;R-HSA-164500;R-HSA-180885;R-HSA-180634;R-HSA-164507;R-HSA-167192;R-HSA-164504;R-HSA-180632;R-HSA-164505;R-HSA-164510;R-HSA-167196;R-HSA-164508;R-HSA-167197;R-HSA-164509;R-HSA-9613490;R-HSA-167459;R-HSA-164515;R-HSA-164512;R-HSA-167072;R-HSA-164513;R-HSA-164519;R-HSA-167076;R-HSA-165028;R-HSA-…
R-HSA-2565942	Regulation of PLK1 Activity at G2/M Transition	15	92	0.00657942	1.23e-05	0.000259	5	12	0.00101798	9606	Homo sapiens	DYNC1H1;HSP90AA1;DCTN2;DCTN1;TUBB4B;TUBG1;CKAP5;TUBA4A;PPP2R1A;CDK1;MAPRE1;PRKACA;CLASP1;PAFAH1B1		R-HSA-3000319;R-HSA-4086410;R-HSA-2574845;R-HSA-3000310;R-HSA-2574840
R-HSA-5663205	Infectious disease	45	537	0.0384038	1.33e-05	0.000267	117	330	0.0279946	9606	Homo sapiens	FEN1;PSMD11;CCNT1;GTF2B;ANTXR1;PSMA7;IPO5;PSMD8;XPO1;PSMB5;RPS18;PSMD5;TPR;PSMB1;RPS3;FYN;RPL38;NELFCD;PAK2;RPS12;RANBP1;SUPT16H;HSP90AA1;PDCD6IP;MAP2K2;TXNRD1;RPSA;SSRP1;EEF2;GTF2F1;SUPT5H;CDK9;RPS25;PSMA6;PSMA4;PSMA2;NMT1;TCEA1;RPS20;RPS21;PPIA;HSPA1B		R-HSA-180739;R-HSA-8951690;R-HSA-182795;R-HSA-5210947;R-HSA-167181;R-HSA-5210944;R-HSA-167191;R-HSA-167192;R-HSA-167196;R-HSA-167197;R-HSA-9613490;R-HSA-167459;R-HSA-9613498;R-HSA-167468;R-HSA-167474;R-HSA-167478;R-HSA-5336421;R-HSA-5336420;R-HSA-173111;R-HSA-167477;R-HSA-173115;R-HSA-167481;R-HSA-192830;R-HSA-167484;R-HSA-167234;R-HSA-167235;R-HSA-173642;R-HSA-182859;R-HSA-184392;R-HSA-192841;R-…
R-HSA-8953854	Metabolism of RNA	59	782	0.0559251	1.39e-05	0.000278	88	187	0.0158636	9606	Homo sapiens	LTV1;HBS1L;EIF4A1;DDX46;PHAX;EPRS;EDC3;PSMD8;TRMT112;XPO1;NOB1;RPS18;PSMD5;PPP2R1A;KHSRP;TNKS1BP1;RPL38;PRKACA;TNPO1;RPS12;UPF2;PRMT5;NSUN2;RPSA;TRNT1;GTF2F1;PUS7;PSMA6;PSMA4;PSMA2;GEMIN4;SRSF2;GEMIN5;ETF1;PSMD11;SET;ANP32A;PRCC;DDX20;GSPT1;PSMA7;PSMB5;TPR;PSMB1;RPS3;EIF4B;SRSF11;PAIP1;GPKOW;UPF3B;SUPT5H;RPS25;QARS;GLOD4;RPS20;FAM98B;DCP1A;RPS21;HSPA1B;EIF4G1		R-HSA-8849157;R-HSA-429955;R-HSA-8941312;R-HSA-77069;R-HSA-77068;R-HSA-77073;R-HSA-191763;R-HSA-450580;R-HSA-77587;R-HSA-158481;R-HSA-77077;R-HSA-158484;R-HSA-77078;R-HSA-77081;R-HSA-450463;R-HSA-77083;R-HSA-77594;R-HSA-6783483;R-HSA-77085;R-HSA-72095;R-HSA-927889;R-HSA-6790982;R-HSA-6786501;R-HSA-429860;R-HSA-927789;R-HSA-77090;R-HSA-450466;R-HSA-450595;R-HSA-450592;R-HSA-6786881;R-HSA-72103;R-H…
R-HSA-391251	Protein folding	16	106	0.00758063	1.63e-05	0.000309	27	28	0.0023753	9606	Homo sapiens	CCT3;CCT2;VBP1;TUBB4B;TUBA4A;CCT6A;TCP1;GNB4;CCT8;CCT7;PFDN5;CCT5;CCT4		R-HSA-6814119;R-HSA-389956;R-HSA-390470;R-HSA-389955;R-HSA-389954;R-HSA-8850560;R-HSA-389964;R-HSA-6814124;R-HSA-389961;R-HSA-6814121;R-HSA-389963;R-HSA-6814120;R-HSA-389972;R-HSA-389974;R-HSA-389969;R-HSA-389970;R-HSA-8850527;R-HSA-389980;R-HSA-389976;R-HSA-389978;R-HSA-8850534;R-HSA-8850529;R-HSA-391266;R-HSA-8850539;R-HSA-390453;R-HSA-6814418;R-HSA-390459
R-HSA-5687128	MAPK6/MAPK4 signaling	16	106	0.00758063	1.63e-05	0.000309	11	40	0.00339328	9606	Homo sapiens	PSMD11;PSMA7;PSMD8;DNAJB1;PSMA6;XPO1;PSMA4;PSMB5;PSMA2;PSMD5;AGO2;PSMB1;CDK1;PRKACA;PAK2		R-HSA-5687109;R-HSA-5690245;R-HSA-5692755;R-HSA-5687088;R-HSA-5687086;R-HSA-389788;R-HSA-5687103;R-HSA-5627775;R-HSA-5690250;R-HSA-5687112;R-HSA-5687113
R-HSA-2408522	Selenoamino acid metabolism	22	184	0.0131588	1.73e-05	0.000329	8	33	0.00279946	9606	Homo sapiens	DARS;AHCY;TXNRD1;SARS;RPSA;EPRS;AIMP1;AIMP2;RPS25;KARS;QARS;RPS18;LARS;MARS;RARS;RPS3;RPL38;RPS20;IARS;EEF1E1;RPS21;RPS12		R-HSA-2408532;R-HSA-5263616;R-HSA-2408529;R-HSA-2408546;R-HSA-2408526;R-HSA-2408558;R-HSA-5333615;R-HSA-5263614
R-HSA-3371511	HSF1 activation	10	43	0.00307516	1.91e-05	0.000344	4	7	0.000594	9606	Homo sapiens	DNAJB1;HSP90AA1;RPA1;FKBP4;HSPA1B		R-HSA-3371586;R-HSA-4793819;R-HSA-5082409;R-HSA-5324632
R-HSA-6798695	Neutrophil degranulation	41	480	0.0343274	2.12e-05	0.000381	10	10	0.000848	9606	Homo sapiens	GPI;PSMD11;GDI2;UBR4;PTPRJ;HMGB1;CAND1;COMMD9;PSMB1;CPNE1;CCT8;LTA4H;CD55;PGM1;DYNC1H1;CBR1;CCT2;SERPINB1;HSP90AA1;PGAM1;NME2;PA2G4;MIF;TUBB4B;EEF2;PRDX6;SERPINB6;DIAPH1;ACLY;PKM;IMPDH1;PSMA2;IMPDH2;ALDOA;PPIA;HSPA1B;VCL;PAFAH1B2		R-HSA-6798743;R-HSA-6799350;R-HSA-6798739;R-HSA-6800434;R-HSA-6798751;R-HSA-6798749;R-HSA-6798748;R-HSA-6798747;R-HSA-6800426;R-HSA-6798745
R-HSA-8953897	Cellular responses to external stimuli	48	599	0.0428377	2.12e-05	0.000382	53	254	0.0215473	9606	Homo sapiens	PSMD11;DCTN2;DCTN1;TXN;PSMA7;PSMD8;PRDX2;STIP1;DNAJB1;PSMB5;BAG3;PSMD5;PRDX1;TPR;PSMB1;DYNC1H1;HSP90AA1;ANAPC7;HSPA4;TXNRD2;TXNRD1;ATG9A;RPA1;GPX8;TUBB4B;PRDX6;TUBA4A;MTOR;DNAJA1;PSMA6;PSMA4;DNAJC7;PSMA2;CDK2;TPP1;FKBP4;HSPA1B		R-HSA-3790137;R-HSA-5682385;R-HSA-5672017;R-HSA-5324632;R-HSA-3790130;R-HSA-3788725;R-HSA-3788724;R-HSA-3371554;R-HSA-4793819;R-HSA-3788705;R-HSA-5324617;R-HSA-3323050;R-HSA-5252041;R-HSA-5672010;R-HSA-187934;R-HSA-3788708;R-HSA-5251955;R-HSA-5251959;R-HSA-5672817;R-HSA-3341343;R-HSA-3371422;R-HSA-73646;R-HSA-5251942;R-HSA-5082356;R-HSA-69562;R-HSA-5252079;R-HSA-3341296;R-HSA-3225851;R-HSA-508236…
R-HSA-6814122	Cooperation of PDCL (PhLP1) and TRiC/CCT in G-protein beta folding	10	45	0.00321819	2.8e-05	0.000483	10	11	0.000933	9606	Homo sapiens	CCT6A;CCT3;CCT2;TCP1;GNB4;CCT8;CCT7;CCT5;CCT4		R-HSA-6814119;R-HSA-8850534;R-HSA-6814418;R-HSA-8850529;R-HSA-8850560;R-HSA-8850527;R-HSA-6814124;R-HSA-8850539;R-HSA-6814121;R-HSA-6814120
R-HSA-5620912	Anchoring of the basal body to the plasma membrane	15	99	0.00708003	2.84e-05	0.000483	8	9	0.000763	9606	Homo sapiens	DYNC1H1;HSP90AA1;DCTN2;DCTN1;TUBB4B;TUBG1;CKAP5;TUBA4A;PPP2R1A;CDK1;MAPRE1;PRKACA;CLASP1;PAFAH1B1		R-HSA-5626228;R-HSA-5626227;R-HSA-5626220;R-HSA-5626223;R-HSA-5626681;R-HSA-5617816;R-HSA-5626699;R-HSA-5638009
R-HSA-5610787	Hedgehog 'off' state	17	124	0.00886791	2.97e-05	0.000505	11	32	0.00271463	9606	Homo sapiens	PSMD11;TUBB4B;TUBA4A;PSMA7;PSMD8;PSMA6;PSMA4;PSMB5;PSMA2;PSMD5;PSMB1;GNAS;PRKACA		R-HSA-5610757;R-HSA-5610741;R-HSA-5610727;R-HSA-5610758;R-HSA-5610720;R-HSA-5610754;R-HSA-5610733;R-HSA-5610717;R-HSA-5610749;R-HSA-5610767;R-HSA-5610760
R-HSA-450408	AUF1 (hnRNP D0) binds and destabilizes mRNA	11	56	0.00400486	3.43e-05	0.000583	3	4	0.000339	9606	Homo sapiens	PSMD8;PSMA6;PSMD11;PSMA4;PSMB5;PSMA2;PSMD5;PSMB1;HSPA1B;PSMA7;EIF4G1		R-HSA-450551;R-HSA-450580;R-HSA-450466
R-HSA-5617833	Cilium Assembly	23	208	0.0148752	3.71e-05	0.00063	19	50	0.0042416	9606	Homo sapiens	CCT3;DYNC1H1;CCT2;HSP90AA1;DCTN2;DCTN1;TUBB4B;TUBG1;CKAP5;TUBA4A;PPP2R1A;TCP1;CDK1;CCT8;MAPRE1;PRKACA;TNPO1;CCT5;CLASP1;CCT4;PAFAH1B1		R-HSA-5624949;R-HSA-5626228;R-HSA-5624948;R-HSA-5624951;R-HSA-5625424;R-HSA-5626227;R-HSA-5625426;R-HSA-5624125;R-HSA-5626681;R-HSA-5617816;R-HSA-5618328;R-HSA-5624952;R-HSA-5618331;R-HSA-5638009;R-HSA-5625421;R-HSA-5626220;R-HSA-5626223;R-HSA-5625416;R-HSA-5626699
R-HSA-176408	Regulation of APC/C activators between G1/S and early anaphase	13	82	0.00586426	6.1e-05	0.000976	8	14	0.00118765	9606	Homo sapiens	PSMD11;ANAPC7;PSMA7;PSMD8;PSMA6;PSMA4;PSMB5;PSMA2;PSMD5;CDK2;PSMB1;CDK1;BUB3		R-HSA-188371;R-HSA-174122;R-HSA-174203;R-HSA-174139;R-HSA-174251;R-HSA-141423;R-HSA-174079;R-HSA-141437
R-HSA-390471	Association of TriC/CCT with target proteins during biosynthesis	9	40	0.00286062	6.35e-05	0.00101677	2	2	0.00017	9606	Homo sapiens	CCT6A;CCT3;CCT2;TCP1;CCT8;CCT7;CCT5;CCT4		R-HSA-390470;R-HSA-391266
R-HSA-211733	Regulation of activated PAK-2p34 by proteasome mediated degradation	10	50	0.00357577	6.67e-05	0.00106685	2	2	0.00017	9606	Homo sapiens	PSMD8;PSMA6;PSMD11;PSMA4;PSMB5;PSMA2;PSMD5;PSMB1;PAK2;PSMA7		R-HSA-211715;R-HSA-211734
R-HSA-174184	Cdc20:Phospho-APC/C mediated degradation of Cyclin A	12	72	0.00514911	7.3e-05	0.00116731	3	3	0.000254	9606	Homo sapiens	PSMD8;PSMA6;PSMD11;PSMA4;PSMB5;ANAPC7;PSMA2;PSMD5;PSMB1;CDK1;BUB3;PSMA7		R-HSA-174171;R-HSA-174104;R-HSA-174255
R-HSA-179419	APC:Cdc20 mediated degradation of cell cycle proteins prior to satisfation of the cell cycle checkpoint	12	73	0.00522062	8.29e-05	0.00124387	6	6	0.000509	9606	Homo sapiens	PSMD8;PSMA6;PSMD11;PSMA4;PSMB5;ANAPC7;PSMA2;PSMD5;PSMB1;CDK1;BUB3;PSMA7		R-HSA-179410;R-HSA-174171;R-HSA-174104;R-HSA-179417;R-HSA-174255;R-HSA-179421
R-HSA-5610780	Degradation of GLI1 by the proteasome	11	62	0.00443396	8.41e-05	0.00126092	3	6	0.000509	9606	Homo sapiens	PSMD8;PSMA6;PSMD11;PSMA4;PSMB5;PSMA2;PSMD5;PSMB1;PRKACA;PSMA7		R-HSA-5610741;R-HSA-5610758;R-HSA-5610760
R-HSA-5610785	GLI3 is processed to GLI3R by the proteasome	11	62	0.00443396	8.41e-05	0.00126092	2	5	0.000424	9606	Homo sapiens	PSMD8;PSMA6;PSMD11;PSMA4;PSMB5;PSMA2;PSMD5;PSMB1;PRKACA;PSMA7		R-HSA-5610720;R-HSA-5610754
R-HSA-5610783	Degradation of GLI2 by the proteasome	11	62	0.00443396	8.41e-05	0.00126092	2	5	0.000424	9606	Homo sapiens	PSMD8;PSMA6;PSMD11;PSMA4;PSMB5;PSMA2;PSMD5;PSMB1;PRKACA;PSMA7		R-HSA-5610757;R-HSA-5610717
R-HSA-69206	G1/S Transition	18	150	0.0107273	9.41e-05	0.00135204	25	61	0.00517475	9606	Homo sapiens	PRIM2;PSMD11;RPA1;TYMS;PSMA7;PSMD8;PSMA6;PSMA4;PSMB5;PSMA2;PSMD5;PPP2R1A;CDK2;POLE3;PSMB1;CDK1		R-HSA-187520;R-HSA-8961934;R-HSA-69191;R-HSA-8961920;R-HSA-69195;R-HSA-8962050;R-HSA-69199;R-HSA-157906;R-HSA-8848414;R-HSA-113503;R-HSA-188386;R-HSA-68960;R-HSA-113504;R-HSA-187552;R-HSA-188390;R-HSA-113638;R-HSA-68914;R-HSA-8848436;R-HSA-187574;R-HSA-68917;R-HSA-68916;R-HSA-187575;R-HSA-68918;R-HSA-69562;R-HSA-188350
R-HSA-6811436	COPI-independent Golgi-to-ER retrograde traffic	11	63	0.00450547	9.66e-05	0.00135204	4	7	0.000594	9606	Homo sapiens	DYNC1H1;DCTN2;DCTN1;GALNT1;TUBB4B;PAFAH1B3;PAFAH1B2;TUBA4A;PAFAH1B1		R-HSA-8849350;R-HSA-8848484;R-HSA-8849348;R-HSA-8849353
R-HSA-3371453	Regulation of HSF1-mediated heat shock response	15	111	0.00793821	0.0001	0.00140421	8	14	0.00118765	9606	Homo sapiens	DNAJB1;DNAJC7;BAG3;HSPA4;TPR;RPA1;FKBP4;HSPA1B		R-HSA-5251955;R-HSA-5251942;R-HSA-5251959;R-HSA-3371467;R-HSA-5252041;R-HSA-5333051;R-HSA-3371518;R-HSA-5252079
R-HSA-927802	Nonsense-Mediated Decay (NMD)	16	124	0.00886791	0.000101	0.00141223	6	6	0.000509	9606	Homo sapiens	UPF2;UPF3B;RPSA;GSPT1;RPS25;RPS18;PPP2R1A;RPS3;ETF1;RPL38;RPS20;DCP1A;RPS21;EIF4G1;RPS12		R-HSA-927836;R-HSA-927789;R-HSA-927832;R-HSA-927830;R-HSA-927813;R-HSA-927889
R-HSA-975957	Nonsense Mediated Decay (NMD) enhanced by the Exon Junction Complex (EJC)	16	124	0.00886791	0.000101	0.00141223	5	5	0.000424	9606	Homo sapiens	UPF2;UPF3B;RPSA;GSPT1;RPS25;RPS18;PPP2R1A;RPS3;ETF1;RPL38;RPS20;DCP1A;RPS21;EIF4G1;RPS12		R-HSA-927836;R-HSA-927832;R-HSA-927830;R-HSA-927813;R-HSA-927889
R-HSA-195258	RHO GTPase Effectors	29	316	0.0225989	0.000104	0.00145619	26	107	0.00907703	9606	Homo sapiens	SET;MIS12;KLC1;PMF1;XPO1;PPP2R1A;KIF5B;CFL1;BUB3;PAK2;CLASP1;CLASP2;DYNC1H1;SEC13;NUDC;RCC2;TUBB4B;CKAP5;TUBA4A;KTN1;DIAPH1;CENPF;KIF2A;PKN2;MAPRE1;PFN1;PAFAH1B1		R-HSA-5666070;R-HSA-5665751;R-HSA-5672083;R-HSA-5623632;R-HSA-5666129;R-HSA-5665809;R-HSA-5666001;R-HSA-5668932;R-HSA-5665989;R-HSA-5623622;R-HSA-442832;R-HSA-3928608;R-HSA-5665802;R-HSA-5672329;R-HSA-8981931;R-HSA-445797;R-HSA-5666160;R-HSA-5623667;R-HSA-5665982;R-HSA-5627775;R-HSA-5665659;R-HSA-5668984;R-HSA-5666169;R-HSA-5665767;R-HSA-5625959;R-HSA-203070
R-HSA-176409	APC/C:Cdc20 mediated degradation of mitotic proteins	12	75	0.00536366	0.000106	0.0014899	13	13	0.00110282	9606	Homo sapiens	PSMD8;PSMA6;PSMD11;PSMA4;PSMB5;ANAPC7;PSMA2;PSMD5;PSMB1;CDK1;BUB3;PSMA7		R-HSA-174144;R-HSA-174120;R-HSA-174121;R-HSA-174255;R-HSA-174157;R-HSA-179410;R-HSA-174227;R-HSA-174202;R-HSA-174171;R-HSA-174104;R-HSA-179417;R-HSA-174238;R-HSA-179421
R-HSA-176814	Activation of APC/C and APC/C:Cdc20 mediated degradation of mitotic proteins	12	76	0.00543517	0.00012	0.00156224	15	15	0.00127248	9606	Homo sapiens	PSMD8;PSMA6;PSMD11;PSMA4;PSMB5;ANAPC7;PSMA2;PSMD5;PSMB1;CDK1;BUB3;PSMA7		R-HSA-174144;R-HSA-174119;R-HSA-174120;R-HSA-174121;R-HSA-174255;R-HSA-174157;R-HSA-179410;R-HSA-174227;R-HSA-174132;R-HSA-174202;R-HSA-174171;R-HSA-174104;R-HSA-179417;R-HSA-174238;R-HSA-179421
R-HSA-69002	DNA Replication Pre-Initiation	13	88	0.00629336	0.000122	0.00158484	6	21	0.00178147	9606	Homo sapiens	PRIM2;PSMD11;RPA1;PSMA7;PSMD8;PSMA6;PSMA4;PSMB5;PSMA2;PSMD5;CDK2;POLE3;PSMB1		R-HSA-68960;R-HSA-68914;R-HSA-68917;R-HSA-68916;R-HSA-68918;R-HSA-68825
R-HSA-169911	Regulation of Apoptosis	10	54	0.00386183	0.000124	0.00161398	4	5	0.000424	9606	Homo sapiens	PSMD8;PSMA6;PSMD11;PSMA4;PSMB5;PSMA2;PSMD5;PSMB1;PAK2;PSMA7		R-HSA-211715;R-HSA-211731;R-HSA-211734;R-HSA-211716
R-HSA-453276	Regulation of mitotic cell cycle	13	90	0.00643639	0.000151	0.00196891	31	38	0.00322362	9606	Homo sapiens	PSMD11;ANAPC7;PSMA7;PSMD8;PSMA6;PSMA4;PSMB5;PSMA2;PSMD5;CDK2;PSMB1;CDK1;BUB3		R-HSA-174144;R-HSA-174088;R-HSA-174157;R-HSA-179410;R-HSA-174227;R-HSA-188371;R-HSA-174224;R-HSA-174171;R-HSA-174104;R-HSA-174105;R-HSA-179417;R-HSA-174238;R-HSA-188191;R-HSA-179421;R-HSA-174119;R-HSA-174058;R-HSA-174122;R-HSA-174251;R-HSA-174120;R-HSA-174057;R-HSA-174121;R-HSA-174255;R-HSA-141423;R-HSA-174195;R-HSA-174070;R-HSA-174132;R-HSA-174202;R-HSA-174203;R-HSA-174139;R-HSA-174079;R-HSA-141…
R-HSA-174143	APC/C-mediated degradation of cell cycle proteins	13	90	0.00643639	0.000151	0.00196891	31	38	0.00322362	9606	Homo sapiens	PSMD11;ANAPC7;PSMA7;PSMD8;PSMA6;PSMA4;PSMB5;PSMA2;PSMD5;CDK2;PSMB1;CDK1;BUB3		R-HSA-174144;R-HSA-174088;R-HSA-174157;R-HSA-179410;R-HSA-174227;R-HSA-188371;R-HSA-174224;R-HSA-174171;R-HSA-174104;R-HSA-174105;R-HSA-179417;R-HSA-174238;R-HSA-188191;R-HSA-179421;R-HSA-174119;R-HSA-174058;R-HSA-174122;R-HSA-174251;R-HSA-174120;R-HSA-174057;R-HSA-174121;R-HSA-174255;R-HSA-141423;R-HSA-174195;R-HSA-174070;R-HSA-174132;R-HSA-174202;R-HSA-174203;R-HSA-174139;R-HSA-174079;R-HSA-141…
R-HSA-6811442	Intra-Golgi and retrograde Golgi-to-ER traffic	22	218	0.0155904	0.000195	0.00242959	13	48	0.00407194	9606	Homo sapiens	DYNC1H1;COPA;DCTN2;DCTN1;GALNT1;GOLIM4;KIF11;TUBB4B;KLC1;TUBA4A;ARCN1;KIF2A;ALPP;KIF5B;COPG1;PAFAH1B3;COPE;PAFAH1B2;PAFAH1B1		R-HSA-8849350;R-HSA-8848484;R-HSA-8849348;R-HSA-6811427;R-HSA-8847875;R-HSA-6811426;R-HSA-8849353;R-HSA-6811412;R-HSA-8847635;R-HSA-6811423;R-HSA-6811418;R-HSA-6811417;R-HSA-8847544
R-HSA-69239	Synthesis of DNA	16	132	0.00944003	0.000202	0.00242959	17	26	0.00220563	9606	Homo sapiens	PRIM2;FEN1;PSMD11;ANAPC7;RPA1;PSMA7;PSMD8;PSMA6;PSMA4;PSMB5;PSMA2;PSMD5;POLD1;CDK2;POLE3;PSMB1		R-HSA-69152;R-HSA-69127;R-HSA-69063;R-HSA-69005;R-HSA-69068;R-HSA-68913;R-HSA-68944;R-HSA-69074;R-HSA-69140;R-HSA-68948;R-HSA-69015;R-HSA-69142;R-HSA-68950;R-HSA-69144;R-HSA-69016;R-HSA-69053;R-HSA-69116
R-HSA-162909	Host Interactions of HIV factors	17	148	0.0105843	0.000241	0.00289188	18	54	0.00458093	9606	Homo sapiens	RANBP1;PSMD11;CCNT1;PSMA7;PSMD8;CDK9;PSMA6;XPO1;PSMA4;PSMB5;PSMA2;PSMD5;TPR;PSMB1;FYN;PPIA;PAK2		R-HSA-167234;R-HSA-167235;R-HSA-180739;R-HSA-180710;R-HSA-165028;R-HSA-165034;R-HSA-180622;R-HSA-164943;R-HSA-200908;R-HSA-165043;R-HSA-165047;R-HSA-180885;R-HSA-180634;R-HSA-180603;R-HSA-180632;R-HSA-165055;R-HSA-180732;R-HSA-180573
R-HSA-70171	Glycolysis	14	108	0.00772366	0.000256	0.00307667	11	24	0.00203597	9606	Homo sapiens	GPI;PKM;TPI1;PPP2R1A;PGAM1;TPR;PGK1;ENO1;ALDOA;PRKACA;GAPDH		R-HSA-70449;R-HSA-163750;R-HSA-70471;R-HSA-71654;R-HSA-70454;R-HSA-71670;R-HSA-71496;R-HSA-71850;R-HSA-71660;R-HSA-170796;R-HSA-163773
R-HSA-199977	ER to Golgi Anterograde Transport	18	164	0.0117285	0.000275	0.00329931	22	39	0.00330845	9606	Homo sapiens	DYNC1H1;SEC13;SEC23A;COPA;DCTN2;DCTN1;SEC16A;TUBB4B;TUBA4A;ARCN1;TFG;PPP6R3;COPG1;SEC24C;COPE;CD55		R-HSA-6807877;R-HSA-5694421;R-HSA-5694418;R-HSA-6807875;R-HSA-203973;R-HSA-6807872;R-HSA-5694417;R-HSA-6809006;R-HSA-5694527;R-HSA-204008;R-HSA-6809003;R-HSA-5694522;R-HSA-5694439;R-HSA-5694436;R-HSA-6809011;R-HSA-6809010;R-HSA-5694435;R-HSA-5694446;R-HSA-5694415;R-HSA-5694413;R-HSA-5694441;R-HSA-5694409
R-HSA-167243	Tat-mediated HIV elongation arrest and recovery	8	39	0.0027891	0.000297	0.0035682	3	3	0.000254	9606	Homo sapiens	CDK9;SUPT16H;CCNT1;TCEA1;NELFCD;SSRP1;GTF2F1;SUPT5H		R-HSA-167090;R-HSA-167459;R-HSA-167148
R-HSA-167238	Pausing and recovery of Tat-mediated HIV elongation	8	39	0.0027891	0.000297	0.0035682	2	2	0.00017	9606	Homo sapiens	CDK9;SUPT16H;CCNT1;TCEA1;NELFCD;SSRP1;GTF2F1;SUPT5H		R-HSA-167076;R-HSA-167150
R-HSA-167287	HIV elongation arrest and recovery	8	40	0.00286062	0.000351	0.00386279	3	3	0.000254	9606	Homo sapiens	CDK9;SUPT16H;CCNT1;TCEA1;NELFCD;SSRP1;GTF2F1;SUPT5H		R-HSA-167284;R-HSA-167288;R-HSA-167481
R-HSA-167290	Pausing and recovery of HIV elongation	8	40	0.00286062	0.000351	0.00386279	2	2	0.00017	9606	Homo sapiens	CDK9;SUPT16H;CCNT1;TCEA1;NELFCD;SSRP1;GTF2F1;SUPT5H		R-HSA-167282;R-HSA-167292
R-HSA-70326	Glucose metabolism	16	139	0.00994064	0.000355	0.00390455	20	50	0.0042416	9606	Homo sapiens	GPI;TPI1;GOT1;PGAM1;ENO1;PC;PKM;PPP2R1A;TPR;PGK1;ALDOA;PRKACA;GAPDH		R-HSA-70592;R-HSA-163750;R-HSA-70501;R-HSA-71495;R-HSA-70471;R-HSA-71654;R-HSA-71496;R-HSA-70475;R-HSA-71850;R-HSA-71660;R-HSA-170796;R-HSA-70449;R-HSA-70481;R-HSA-70482;R-HSA-71445;R-HSA-70454;R-HSA-70486;R-HSA-71670;R-HSA-163773;R-HSA-70494
R-HSA-5358351	Signaling by Hedgehog	18	168	0.0120146	0.000364	0.00400749	15	82	0.00695623	9606	Homo sapiens	PSMD11;TUBB4B;TUBA4A;CDC73;PSMA7;PSMD8;PSMA6;PSMA4;PSMB5;PSMA2;PSMD5;PSMB1;GNAS;PRKACA		R-HSA-5610741;R-HSA-5362448;R-HSA-5610717;R-HSA-5610749;R-HSA-5635868;R-HSA-5610757;R-HSA-5635845;R-HSA-5610727;R-HSA-5610758;R-HSA-5610720;R-HSA-5610754;R-HSA-5610733;R-HSA-5610767;R-HSA-5635854;R-HSA-5610760
R-HSA-187577	SCF(Skp2)-mediated degradation of p27/p21	10	62	0.00443396	0.000368	0.00404646	6	7	0.000594	9606	Homo sapiens	PSMD8;PSMA6;PSMD11;PSMA4;PSMB5;PSMA2;PSMD5;CDK2;PSMB1;PSMA7		R-HSA-187552;R-HSA-187520;R-HSA-8848436;R-HSA-187574;R-HSA-187575;R-HSA-8848414
R-HSA-69017	CDK-mediated phosphorylation and removal of Cdc6	11	74	0.00529214	0.000377	0.00414475	3	4	0.000339	9606	Homo sapiens	PSMD8;PSMA6;PSMD11;PSMA4;PSMB5;ANAPC7;PSMA2;PSMD5;CDK2;PSMB1;PSMA7		R-HSA-69015;R-HSA-69016;R-HSA-69005
R-HSA-69306	DNA Replication	16	141	0.0100837	0.000414	0.00416071	23	47	0.00398711	9606	Homo sapiens	PRIM2;FEN1;PSMD11;ANAPC7;RPA1;PSMA7;PSMD8;PSMA6;PSMA4;PSMB5;PSMA2;PSMD5;POLD1;CDK2;POLE3;PSMB1		R-HSA-68960;R-HSA-69152;R-HSA-69127;R-HSA-69063;R-HSA-69005;R-HSA-69068;R-HSA-68913;R-HSA-68944;R-HSA-68914;R-HSA-69074;R-HSA-68917;R-HSA-68916;R-HSA-69140;R-HSA-68948;R-HSA-69015;R-HSA-69142;R-HSA-68950;R-HSA-68918;R-HSA-68825;R-HSA-69144;R-HSA-69016;R-HSA-69053;R-HSA-69116
R-HSA-174084	Autodegradation of Cdh1 by Cdh1:APC/C	10	63	0.00450547	0.000416	0.00416071	2	2	0.00017	9606	Homo sapiens	PSMD8;PSMA6;PSMD11;PSMA4;PSMB5;ANAPC7;PSMA2;PSMD5;PSMB1;PSMA7		R-HSA-174058;R-HSA-174057
R-HSA-350562	Regulation of ornithine decarboxylase (ODC)	9	52	0.0037188	0.000434	0.00434175	1	4	0.000339	9606	Homo sapiens	PSMD8;PSMA6;PSMD11;PSMA4;PSMB5;PSMA2;PSMD5;PSMB1;PSMA7		R-HSA-353125
R-HSA-180534	Vpu mediated degradation of CD4	9	53	0.00379032	0.000497	0.00496881	1	5	0.000424	9606	Homo sapiens	PSMD8;PSMA6;PSMD11;PSMA4;PSMB5;PSMA2;PSMD5;PSMB1;PSMA7		R-HSA-180573
R-HSA-1236978	Cross-presentation of soluble exogenous antigens (endosomes)	9	53	0.00379032	0.000497	0.00496881	1	6	0.000509	9606	Homo sapiens	PSMD8;PSMA6;PSMD11;PSMA4;PSMB5;PSMA2;PSMD5;PSMB1;PSMA7		R-HSA-1236970
R-HSA-453279	Mitotic G1-G1/S phases	18	173	0.0123722	0.000511	0.00510648	32	98	0.00831354	9606	Homo sapiens	PRIM2;PSMD11;RPA1;TYMS;PSMA7;PSMD8;PSMA6;PSMA4;PSMB5;PSMA2;PSMD5;PPP2R1A;CDK2;POLE3;PSMB1;CDK1		R-HSA-187520;R-HSA-8961934;R-HSA-69191;R-HSA-8961920;R-HSA-69195;R-HSA-8962050;R-HSA-69199;R-HSA-157906;R-HSA-1363276;R-HSA-8848414;R-HSA-113503;R-HSA-1363274;R-HSA-8964567;R-HSA-188386;R-HSA-68960;R-HSA-113504;R-HSA-187552;R-HSA-188390;R-HSA-1363314;R-HSA-113638;R-HSA-68914;R-HSA-1363303;R-HSA-8848436;R-HSA-187574;R-HSA-68917;R-HSA-68916;R-HSA-187575;R-HSA-68918;R-HSA-1363311;R-HSA-69562;R-HSA-1…
R-HSA-69229	Ubiquitin-dependent degradation of Cyclin D1	9	54	0.00386183	0.000567	0.00566834	1	5	0.000424	9606	Homo sapiens	PSMD8;PSMA6;PSMD11;PSMA4;PSMB5;PSMA2;PSMD5;PSMB1;PSMA7		R-HSA-75825
R-HSA-75815	Ubiquitin-dependent degradation of Cyclin D	9	54	0.00386183	0.000567	0.00566834	1	5	0.000424	9606	Homo sapiens	PSMD8;PSMA6;PSMD11;PSMA4;PSMB5;PSMA2;PSMD5;PSMB1;PSMA7		R-HSA-75825
R-HSA-349425	Autodegradation of the E3 ubiquitin ligase COP1	9	54	0.00386183	0.000567	0.00566834	1	5	0.000424	9606	Homo sapiens	PSMD8;PSMA6;PSMD11;PSMA4;PSMB5;PSMA2;PSMD5;PSMB1;PSMA7		R-HSA-264458
R-HSA-5620922	BBSome-mediated cargo-targeting to cilium	6	24	0.00171637	0.000612	0.00580188	1	5	0.000424	9606	Homo sapiens	CCT3;CCT2;TCP1;CCT8;CCT5;CCT4		R-HSA-5624125
R-HSA-8854050	FBXL7 down-regulates AURKA during mitotic entry and in early mitosis	9	55	0.00393335	0.000645	0.00580188	2	6	0.000509	9606	Homo sapiens	PSMD8;PSMA6;PSMD11;PSMA4;PSMB5;PSMA2;PSMD5;PSMB1;PSMA7		R-HSA-8854071;R-HSA-8854044
R-HSA-174113	SCF-beta-TrCP mediated degradation of Emi1	9	55	0.00393335	0.000645	0.00580188	1	3	0.000254	9606	Homo sapiens	PSMD8;PSMA6;PSMD11;PSMA4;PSMB5;PSMA2;PSMD5;PSMB1;PSMA7		R-HSA-174203
R-HSA-69613	p53-Independent G1/S DNA damage checkpoint	9	55	0.00393335	0.000645	0.00580188	1	5	0.000424	9606	Homo sapiens	PSMD8;PSMA6;PSMD11;PSMA4;PSMB5;PSMA2;PSMD5;PSMB1;PSMA7		R-HSA-69600
R-HSA-69601	Ubiquitin Mediated Degradation of Phosphorylated Cdc25A	9	55	0.00393335	0.000645	0.00580188	1	5	0.000424	9606	Homo sapiens	PSMD8;PSMA6;PSMD11;PSMA4;PSMB5;PSMA2;PSMD5;PSMB1;PSMA7		R-HSA-69600
R-HSA-69610	p53-Independent DNA Damage Response	9	55	0.00393335	0.000645	0.00580188	1	5	0.000424	9606	Homo sapiens	PSMD8;PSMA6;PSMD11;PSMA4;PSMB5;PSMA2;PSMD5;PSMB1;PSMA7		R-HSA-69600
R-HSA-174154	APC/C:Cdc20 mediated degradation of Securin	10	67	0.00479153	0.000665	0.00598136	3	3	0.000254	9606	Homo sapiens	PSMD8;PSMA6;PSMD11;PSMA4;PSMB5;ANAPC7;PSMA2;PSMD5;PSMB1;PSMA7		R-HSA-174144;R-HSA-174202;R-HSA-174121
R-HSA-70263	Gluconeogenesis	10	67	0.00479153	0.000665	0.00598136	9	26	0.00220563	9606	Homo sapiens	GPI;PC;TPI1;GOT1;PGAM1;PGK1;ENO1;ALDOA;GAPDH		R-HSA-70481;R-HSA-70592;R-HSA-70482;R-HSA-71445;R-HSA-70501;R-HSA-71495;R-HSA-70486;R-HSA-70475;R-HSA-70494
R-HSA-2132295	MHC class II antigen presentation	16	148	0.0105843	0.000689	0.0062007	7	26	0.00220563	9606	Homo sapiens	DYNC1H1;SEC13;SEC23A;DCTN2;DCTN1;KIF11;TUBB4B;KLC1;TUBA4A;DNM2;KIF2A;KIF5B;SEC24C		R-HSA-2130641;R-HSA-2213248;R-HSA-8951498;R-HSA-2130725;R-HSA-2213243;R-HSA-2130731;R-HSA-2130619
R-HSA-180585	Vif-mediated degradation of APOBEC3G	9	56	0.00400486	0.000731	0.00657892	1	4	0.000339	9606	Homo sapiens	PSMD8;PSMA6;PSMD11;PSMA4;PSMB5;PSMA2;PSMD5;PSMB1;PSMA7		R-HSA-180603
R-HSA-6811434	COPI-dependent Golgi-to-ER retrograde traffic	13	107	0.00765215	0.000759	0.00683274	6	11	0.000933	9606	Homo sapiens	COPA;KIF2A;KIF5B;COPG1;KIF11;TUBB4B;KLC1;TUBA4A;COPE;ARCN1		R-HSA-6811412;R-HSA-6811427;R-HSA-6811426;R-HSA-6811423;R-HSA-6811418;R-HSA-6811417
R-HSA-4641258	Degradation of DVL	9	57	0.00407638	0.000827	0.00737875	2	7	0.000594	9606	Homo sapiens	PSMD8;PSMA6;PSMD11;PSMA4;PSMB5;PSMA2;PSMD5;PSMB1;PSMA7		R-HSA-1504193;R-HSA-4641260
R-HSA-4641257	Degradation of AXIN	9	57	0.00407638	0.000827	0.00737875	2	8	0.000679	9606	Homo sapiens	PSMD8;PSMA6;PSMD11;PSMA4;PSMB5;PSMA2;PSMD5;PSMB1;PSMA7		R-HSA-3640874;R-HSA-4641256
R-HSA-9604323	Negative regulation of NOTCH4 signaling	9	57	0.00407638	0.000827	0.00737875	1	6	0.000509	9606	Homo sapiens	PSMD8;PSMA6;PSMD11;PSMA4;PSMB5;PSMA2;PSMD5;PSMB1;PSMA7		R-HSA-9604642
R-HSA-8941858	Regulation of RUNX3 expression and activity	9	57	0.00407638	0.000827	0.00737875	1	9	0.000763	9606	Homo sapiens	PSMD8;PSMA6;PSMD11;PSMA4;PSMB5;PSMA2;PSMD5;PSMB1;PSMA7		R-HSA-8952408
R-HSA-5658442	Regulation of RAS by GAPs	10	70	0.00500608	0.000922	0.00737875	3	5	0.000424	9606	Homo sapiens	PSMD8;PSMA6;PSMD11;PSMA4;PSMB5;PSMA2;PSMD5;PSMB1;RASAL2;PSMA7		R-HSA-5658231;R-HSA-5658435;R-HSA-5658430
R-HSA-69563	p53-Dependent G1 DNA Damage Response	10	70	0.00500608	0.000922	0.00737875	3	22	0.0018663	9606	Homo sapiens	PSMD8;PSMA6;PSMD11;PSMA4;PSMB5;PSMA2;PSMD5;CDK2;PSMB1;PSMA7		R-HSA-69562;R-HSA-187934;R-HSA-264458
R-HSA-69580	p53-Dependent G1/S DNA damage checkpoint	10	70	0.00500608	0.000922	0.00737875	3	22	0.0018663	9606	Homo sapiens	PSMD8;PSMA6;PSMD11;PSMA4;PSMB5;PSMA2;PSMD5;CDK2;PSMB1;PSMA7		R-HSA-69562;R-HSA-187934;R-HSA-264458
R-HSA-72731	Recycling of eIF2:GDP	4	10	0.000715	0.000925	0.00740341	2	2	0.00017	9606	Homo sapiens	EIF2B4;EIF2S3;EIF2B2;EIF2S1;EIF2A		R-HSA-72722;R-HSA-72670
R-HSA-5336415	Uptake and function of diphtheria toxin	4	10	0.000715	0.000925	0.00740341	2	5	0.000424	9606	Homo sapiens	HSP90AA1;TXNRD1;EEF2		R-HSA-5336421;R-HSA-5336420
R-HSA-68827	CDT1 association with the CDC6:ORC:origin complex	9	59	0.00421941	0.0010481	0.00838484	1	3	0.000254	9606	Homo sapiens	PSMD8;PSMA6;PSMD11;PSMA4;PSMB5;PSMA2;PSMD5;PSMB1;PSMA7		R-HSA-68825
R-HSA-69541	Stabilization of p53	9	59	0.00421941	0.0010481	0.00838484	1	15	0.00127248	9606	Homo sapiens	PSMD8;PSMA6;PSMD11;PSMA4;PSMB5;PSMA2;PSMD5;PSMB1;PSMA7		R-HSA-264458
R-HSA-5689603	UCH proteinases	12	98	0.00700851	0.00111786	0.00894291	6	11	0.000933	9606	Homo sapiens	PSMD8;PSMA6;PSMD11;PSMA4;PSMB5;PSMA2;PSMD5;PSMB1;NEDD8;OGT;UCHL5;PSMA7		R-HSA-5665854;R-HSA-5689630;R-HSA-5665871;R-HSA-2179291;R-HSA-5689544;R-HSA-5690808
R-HSA-174178	APC/C:Cdh1 mediated degradation of Cdc20 and other APC/C:Cdh1 targeted proteins in late mitosis/early G1	10	72	0.00514911	0.0011359	0.00908717	4	4	0.000339	9606	Homo sapiens	PSMD8;PSMA6;PSMD11;PSMA4;PSMB5;ANAPC7;PSMA2;PSMD5;PSMB1;PSMA7		R-HSA-174195;R-HSA-174088;R-HSA-174105;R-HSA-188191
R-HSA-69615	G1/S DNA Damage Checkpoints	10	72	0.00514911	0.0011359	0.00908717	4	27	0.00229047	9606	Homo sapiens	PSMD8;PSMA6;PSMD11;PSMA4;PSMB5;PSMA2;PSMD5;CDK2;PSMB1;PSMA7		R-HSA-69600;R-HSA-69562;R-HSA-187934;R-HSA-264458
R-HSA-68949	Orc1 removal from chromatin	10	73	0.00522062	0.00125691	0.0100553	2	4	0.000339	9606	Homo sapiens	PSMD8;PSMA6;PSMD11;PSMA4;PSMB5;PSMA2;PSMD5;CDK2;PSMB1;PSMA7		R-HSA-68944;R-HSA-68948
R-HSA-167200	Formation of HIV-1 elongation complex containing HIV-1 Tat	8	49	0.00350425	0.00128671	0.0102126	5	5	0.000424	9606	Homo sapiens	CDK9;SUPT16H;CCNT1;TCEA1;NELFCD;SSRP1;GTF2F1;SUPT5H		R-HSA-170706;R-HSA-167234;R-HSA-170704;R-HSA-167191;R-HSA-167196
R-HSA-5362768	Hh mutants that don't undergo autocatalytic processing are degraded by ERAD	9	61	0.00436244	0.00131549	0.0102126	1	6	0.000509	9606	Homo sapiens	PSMD8;PSMA6;PSMD11;PSMA4;PSMB5;PSMA2;PSMD5;PSMB1;PSMA7		R-HSA-5387392
R-HSA-5676590	NIK-->noncanonical NF-kB signaling	9	61	0.00436244	0.00131549	0.0102126	1	9	0.000763	9606	Homo sapiens	PSMD8;PSMA6;PSMD11;PSMA4;PSMB5;PSMA2;PSMD5;PSMB1;PSMA7		R-HSA-5607731
R-HSA-399954	Sema3A PAK dependent Axon repulsion	5	19	0.00135879	0.00138686	0.0102126	6	6	0.000509	9606	Homo sapiens	HSP90AA1;CFL1;FYN;PAK2		R-HSA-399939;R-HSA-399952;R-HSA-399950;R-HSA-419644;R-HSA-419645;R-HSA-399930
R-HSA-975956	Nonsense Mediated Decay (NMD) independent of the Exon Junction Complex (EJC)	12	101	0.00722306	0.00143589	0.0102126	1	1	8.48e-05	9606	Homo sapiens	RPS25;RPS18;RPS3;RPL38;RPS20;RPSA;ETF1;RPS21;GSPT1;EIF4G1;RPS12		R-HSA-927789
R-HSA-167152	Formation of HIV elongation complex in the absence of HIV Tat	8	50	0.00357577	0.00145894	0.0102126	2	2	0.00017	9606	Homo sapiens	CDK9;SUPT16H;CCNT1;TCEA1;NELFCD;SSRP1;GTF2F1;SUPT5H		R-HSA-167077;R-HSA-167084
R-HSA-162587	HIV Life Cycle	17	175	0.0125152	0.00149458	0.010462	86	115	0.00975568	9606	Homo sapiens	RANBP1;FEN1;SUPT16H;PDCD6IP;CCNT1;GTF2B;SSRP1;GTF2F1;SUPT5H;CDK9;XPO1;TPR;NMT1;TCEA1;NELFCD;PPIA		R-HSA-180739;R-HSA-8951690;R-HSA-182795;R-HSA-3159227;R-HSA-167181;R-HSA-167191;R-HSA-164503;R-HSA-164500;R-HSA-180885;R-HSA-164507;R-HSA-167192;R-HSA-164504;R-HSA-164505;R-HSA-164510;R-HSA-167196;R-HSA-164508;R-HSA-167197;R-HSA-164509;R-HSA-9613490;R-HSA-167459;R-HSA-164515;R-HSA-164512;R-HSA-167072;R-HSA-164513;R-HSA-164519;R-HSA-167076;R-HSA-165028;R-HSA-167077;R-HSA-9613498;R-HSA-165034;R-HSA…
R-HSA-194315	Signaling by Rho GTPases	33	447	0.0319674	0.00158161	0.0110713	29	112	0.00950119	9606	Homo sapiens	SET;TRIO;MIS12;GDI2;KLC1;PMF1;XPO1;PPP2R1A;KIF5B;ARHGDIA;CFL1;BUB3;PAK2;CLASP1;CLASP2;DYNC1H1;SEC13;NUDC;RCC2;TUBB4B;CKAP5;TUBA4A;KTN1;DIAPH1;CENPF;KIF2A;PKN2;ARHGEF2;MAPRE1;PFN1;PAFAH1B1		R-HSA-5666070;R-HSA-5665751;R-HSA-5672083;R-HSA-5623632;R-HSA-5666129;R-HSA-5665809;R-HSA-5666001;R-HSA-195146;R-HSA-5668932;R-HSA-5665989;R-HSA-5623622;R-HSA-442832;R-HSA-3928608;R-HSA-5665802;R-HSA-5672329;R-HSA-8981931;R-HSA-194913;R-HSA-445797;R-HSA-194854;R-HSA-5666160;R-HSA-5623667;R-HSA-5665982;R-HSA-5627775;R-HSA-5665659;R-HSA-5668984;R-HSA-5666169;R-HSA-5665767;R-HSA-5625959;R-HSA-203070
R-HSA-162599	Late Phase of HIV Life Cycle	16	161	0.011514	0.00162184	0.0113529	60	77	0.00653207	9606	Homo sapiens	RANBP1;SUPT16H;PDCD6IP;CCNT1;GTF2B;SSRP1;GTF2F1;SUPT5H;CDK9;XPO1;TPR;NMT1;TCEA1;NELFCD;PPIA		R-HSA-180739;R-HSA-3159227;R-HSA-167181;R-HSA-167191;R-HSA-180885;R-HSA-167192;R-HSA-167196;R-HSA-167197;R-HSA-9613490;R-HSA-167459;R-HSA-167072;R-HSA-167076;R-HSA-165028;R-HSA-167077;R-HSA-9613498;R-HSA-165034;R-HSA-167083;R-HSA-167087;R-HSA-167084;R-HSA-167468;R-HSA-167085;R-HSA-167090;R-HSA-167474;R-HSA-165043;R-HSA-167089;R-HSA-167478;R-HSA-165047;R-HSA-167477;R-HSA-167098;R-HSA-167481;R-HSA-…
R-HSA-202403	TCR signaling	15	146	0.0104412	0.00163354	0.0114348	7	52	0.00441127	9606	Homo sapiens	VASP;PSMD11;PTPRJ;PSMA7;PSMD8;ENAH;PSMA6;PSMA4;PSMB5;PSMA2;PSMD5;PSMB1;UBE2N;UBE2V1;PAK2		R-HSA-430183;R-HSA-202534;R-HSA-202214;R-HSA-202453;R-HSA-5607724;R-HSA-202233;R-HSA-430201
R-HSA-112382	Formation of RNA Pol II elongation complex	9	63	0.00450547	0.0016353	0.0114471	2	2	0.00017	9606	Homo sapiens	CDK9;SUPT16H;CCNT1;TCEA1;NELFCD;SSRP1;GTF2F1;SUPT5H;CDC73		R-HSA-112379;R-HSA-112381
R-HSA-195253	Degradation of beta-catenin by the destruction complex	11	90	0.00643639	0.00179531	0.0125671	14	22	0.0018663	9606	Homo sapiens	PSMD8;PSMA6;PSMD11;PSMA4;PSMB5;CTBP2;PSMA2;PSMD5;PPP2R1A;PSMB1;PSMA7		R-HSA-195300;R-HSA-2130279;R-HSA-195275;R-HSA-2130282;R-HSA-195304;R-HSA-5229348;R-HSA-2130286;R-HSA-5229343;R-HSA-195283;R-HSA-195251;R-HSA-195280;R-HSA-5334050;R-HSA-195318;R-HSA-195287
R-HSA-450520	HuR (ELAVL1) binds and stabilizes mRNA	4	12	0.000858	0.00179676	0.0125773	3	7	0.000594	9606	Homo sapiens	XPO1;SET;ANP32A;PRKACA		R-HSA-450550;R-HSA-450595;R-HSA-450387
R-HSA-5387390	Hh mutants abrogate ligand secretion	9	64	0.00457699	0.00181707	0.0127195	1	7	0.000594	9606	Homo sapiens	PSMD8;PSMA6;PSMD11;PSMA4;PSMB5;PSMA2;PSMD5;PSMB1;PSMA7		R-HSA-5387392
R-HSA-156842	Eukaryotic Translation Elongation	12	104	0.0074376	0.00182517	0.0127762	7	9	0.000763	9606	Homo sapiens	EEF1B2;EEF1G;RPS25;EEF1D;RPS18;RPS3;RPL38;RPS20;RPSA;EEF2;RPS21;RPS12		R-HSA-156930;R-HSA-156915;R-HSA-156912;R-HSA-156913;R-HSA-156923;R-HSA-156907;R-HSA-156910
R-HSA-167169	HIV Transcription Elongation	8	52	0.0037188	0.00185806	0.0130064	15	15	0.00127248	9606	Homo sapiens	CDK9;SUPT16H;CCNT1;TCEA1;NELFCD;SSRP1;GTF2F1;SUPT5H		R-HSA-167234;R-HSA-167072;R-HSA-167147;R-HSA-167083;R-HSA-167087;R-HSA-167181;R-HSA-167085;R-HSA-170706;R-HSA-170704;R-HSA-167089;R-HSA-167478;R-HSA-167191;R-HSA-167192;R-HSA-167196;R-HSA-167197
R-HSA-167246	Tat-mediated elongation of the HIV-1 transcript	8	52	0.0037188	0.00185806	0.0130064	8	8	0.000679	9606	Homo sapiens	CDK9;SUPT16H;CCNT1;TCEA1;NELFCD;SSRP1;GTF2F1;SUPT5H		R-HSA-170706;R-HSA-167234;R-HSA-170704;R-HSA-167191;R-HSA-167192;R-HSA-167196;R-HSA-167197;R-HSA-167181
R-HSA-69242	S Phase	17	179	0.0128013	0.0018866	0.0132062	36	54	0.00458093	9606	Homo sapiens	PRIM2;FEN1;PSMD11;ANAPC7;RPA1;PSMA7;PSMD8;PSMA6;PSMA4;PSMB5;PSMA2;PSMD5;POLD1;CDK2;POLE3;PSMB1;WAPAL		R-HSA-187520;R-HSA-174273;R-HSA-69127;R-HSA-69063;R-HSA-69005;R-HSA-69068;R-HSA-187916;R-HSA-68944;R-HSA-69074;R-HSA-69140;R-HSA-68948;R-HSA-69015;R-HSA-174164;R-HSA-69142;R-HSA-68950;R-HSA-69144;R-HSA-69016;R-HSA-8848414;R-HSA-2473151;R-HSA-174110;R-HSA-187934;R-HSA-69152;R-HSA-2468039;R-HSA-187552;R-HSA-174054;R-HSA-2473152;R-HSA-2468041;R-HSA-187948;R-HSA-187949;R-HSA-75825;R-HSA-68913;R-HSA-8…
R-HSA-69052	Switching of origins to a post-replicative state	11	92	0.00657942	0.00212376	0.0148501	5	9	0.000763	9606	Homo sapiens	PSMD8;PSMA6;PSMD11;PSMA4;PSMB5;ANAPC7;PSMA2;PSMD5;CDK2;PSMB1;PSMA7		R-HSA-68944;R-HSA-68948;R-HSA-69015;R-HSA-69016;R-HSA-69005
R-HSA-75955	RNA Polymerase II Transcription Elongation	9	66	0.00472002	0.00222899	0.0148501	8	8	0.000679	9606	Homo sapiens	CDK9;SUPT16H;CCNT1;TCEA1;NELFCD;SSRP1;GTF2F1;SUPT5H;CDC73		R-HSA-112385;R-HSA-113412;R-HSA-112379;R-HSA-113402;R-HSA-112381;R-HSA-112396;R-HSA-113407;R-HSA-112383
R-HSA-4608870	Asymmetric localization of PCP proteins	9	66	0.00472002	0.00222899	0.0148501	1	7	0.000594	9606	Homo sapiens	PSMD8;PSMA6;PSMD11;PSMA4;PSMB5;PSMA2;PSMD5;PSMB1;PSMA7		R-HSA-4608855
R-HSA-5607761	Dectin-1 mediated noncanonical NF-kB signaling	9	66	0.00472002	0.00222899	0.0148501	1	9	0.000763	9606	Homo sapiens	PSMD8;PSMA6;PSMD11;PSMA4;PSMB5;PSMA2;PSMD5;PSMB1;PSMA7		R-HSA-5607731
R-HSA-6807878	COPI-mediated anterograde transport	12	107	0.00765215	0.00229717	0.0148501	7	12	0.00101798	9606	Homo sapiens	DYNC1H1;COPA;DCTN2;DCTN1;COPG1;TUBB4B;TUBA4A;COPE;CD55;ARCN1		R-HSA-6807877;R-HSA-6809011;R-HSA-6807875;R-HSA-6809010;R-HSA-6807872;R-HSA-6809006;R-HSA-6809003
R-HSA-5678895	Defective CFTR causes cystic fibrosis	9	67	0.00479153	0.00246109	0.0148501	1	7	0.000594	9606	Homo sapiens	PSMD8;PSMA6;PSMD11;PSMA4;PSMB5;PSMA2;PSMD5;PSMB1;PSMA7		R-HSA-8866858
R-HSA-72764	Eukaryotic Translation Termination	12	108	0.00772366	0.00247502	0.0148501	4	5	0.000424	9606	Homo sapiens	TRMT112;RPS25;RPS18;RPS3;RPL38;RPS20;RPSA;ETF1;RPS21;GSPT1;RPS12		R-HSA-141671;R-HSA-141691;R-HSA-141673;R-HSA-6800138
R-HSA-6807505	RNA polymerase II transcribes snRNA genes	11	94	0.00672245	0.00249942	0.0149965	9	11	0.000933	9606	Homo sapiens	CDK9;CCNT1;ICE1;ASUN;ICE2;GTF2B;PHAX;RPRD1A;GTF2F1;SUPT5H		R-HSA-6814885;R-HSA-6814549;R-HSA-6814559;R-HSA-6810238;R-HSA-6814555;R-HSA-6810235;R-HSA-6814554;R-HSA-6810234;R-HSA-6810233
R-HSA-110373	Resolution of AP sites via the multiple-nucleotide patch replacement pathway	6	32	0.00228849	0.00260118	0.0156071	15	19	0.00161181	9606	Homo sapiens	FEN1;PARP1;APEX1;POLD1;POLE3;RPA1		R-HSA-110368;R-HSA-110371;R-HSA-5651828;R-HSA-5649873;R-HSA-5649854;R-HSA-5651805;R-HSA-5651739;R-HSA-5649883;R-HSA-5651782;R-HSA-111253;R-HSA-5649856;R-HSA-5651809;R-HSA-110363;R-HSA-110364;R-HSA-5651723
R-HSA-9020702	Interleukin-1 signaling	12	109	0.00779518	0.00266393	0.0159836	10	45	0.00381744	9606	Homo sapiens	PSMD8;PSMA6;PSMD11;PSMA4;PSMB5;PSMA2;PSMD5;PSMB1;UBE2N;HMGB1;UBE2V1;PSMA7		R-HSA-168166;R-HSA-209061;R-HSA-8948063;R-HSA-8948015;R-HSA-168184;R-HSA-8948066;R-HSA-8948018;R-HSA-446877;R-HSA-451418;R-HSA-450187
R-HSA-983189	Kinesins	9	68	0.00486305	0.00271197	0.0162718	6	14	0.00118765	9606	Homo sapiens	KIF2A;KIF5B;KIF11;TUBB4B;KLC1;TUBA4A		R-HSA-984606;R-HSA-984733;R-HSA-983259;R-HSA-983194;R-HSA-990489;R-HSA-983266
R-HSA-68867	Assembly of the pre-replicative complex	9	68	0.00486305	0.00271197	0.0162718	1	12	0.00101798	9606	Homo sapiens	PSMD8;PSMA6;PSMD11;PSMA4;PSMB5;PSMA2;PSMD5;PSMB1;PSMA7		R-HSA-68825
R-HSA-5651801	PCNA-Dependent Long Patch Base Excision Repair	5	23	0.00164485	0.0031465	0.018879	6	6	0.000509	9606	Homo sapiens	FEN1;APEX1;POLD1;POLE3;RPA1		R-HSA-110368;R-HSA-110371;R-HSA-5651809;R-HSA-110363;R-HSA-5651805;R-HSA-110364
R-HSA-1234176	Oxygen-dependent proline hydroxylation of Hypoxia-inducible Factor Alpha	9	70	0.00500608	0.00327426	0.0196455	1	12	0.00101798	9606	Homo sapiens	PSMD8;PSMA6;PSMD11;PSMA4;PSMB5;PSMA2;PSMD5;PSMB1;PSMA7		R-HSA-1234159
R-HSA-4086400	PCP/CE pathway	11	99	0.00708003	0.00367717	0.022063	3	24	0.00203597	9606	Homo sapiens	PSMD8;PSMA6;PSMD11;PSMA4;PSMB5;PSMA2;PSMD5;PSMB1;PRKACA;PFN1;PSMA7		R-HSA-4608855;R-HSA-3965450;R-HSA-5138432
R-HSA-1169091	Activation of NF-kappaB in B cells	9	72	0.00514911	0.00392447	0.0235468	1	10	0.000848	9606	Homo sapiens	PSMD8;PSMA6;PSMD11;PSMA4;PSMB5;PSMA2;PSMD5;PSMB1;PSMA7		R-HSA-1168640
R-HSA-5358346	Hedgehog ligand biogenesis	9	72	0.00514911	0.00392447	0.0235468	1	15	0.00127248	9606	Homo sapiens	PSMD8;PSMA6;PSMD11;PSMA4;PSMB5;PSMA2;PSMD5;PSMB1;PSMA7		R-HSA-5362448
R-HSA-2514853	Condensation of Prometaphase Chromosomes	4	15	0.00107273	0.00397579	0.0238547	4	4	0.000339	9606	Homo sapiens	CDK1;NCAPG;NCAPD2;NCAPH		R-HSA-2514854;R-HSA-2529015;R-HSA-2520883;R-HSA-2529020
R-HSA-5339562	Uptake and actions of bacterial toxins	8	60	0.00429093	0.00438169	0.0262901	10	65	0.00551408	9606	Homo sapiens	HSP90AA1;PDCD6IP;MAP2K2;TXNRD1;EEF2;ANTXR1		R-HSA-5210943;R-HSA-5210909;R-HSA-5211356;R-HSA-5336421;R-HSA-5210923;R-HSA-5336420;R-HSA-5210921;R-HSA-5210935;R-HSA-5210947;R-HSA-5210944
R-HSA-8948751	Regulation of PTEN stability and activity	9	74	0.00529214	0.00467159	0.0280295	1	13	0.00110282	9606	Homo sapiens	PSMD8;PSMA6;PSMD11;PSMA4;PSMB5;PSMA2;PSMD5;PSMB1;PSMA7		R-HSA-8850992
R-HSA-73933	Resolution of Abasic Sites (AP sites)	7	48	0.00343274	0.00467489	0.0280493	26	43	0.00364778	9606	Homo sapiens	FEN1;PARP1;NTHL1;APEX1;POLD1;POLE3;RPA1		R-HSA-5649873;R-HSA-5651805;R-HSA-110349;R-HSA-5651739;R-HSA-5649883;R-HSA-110351;R-HSA-110350;R-HSA-5651782;R-HSA-110353;R-HSA-110352;R-HSA-110355;R-HSA-110354;R-HSA-111253;R-HSA-110356;R-HSA-5649856;R-HSA-110359;R-HSA-110360;R-HSA-110363;R-HSA-110364;R-HSA-5651723;R-HSA-110368;R-HSA-110371;R-HSA-5651828;R-HSA-110375;R-HSA-5649854;R-HSA-5651809
R-HSA-674695	RNA Polymerase II Pre-transcription Events	10	88	0.00629336	0.00470584	0.028235	15	17	0.00144214	9606	Homo sapiens	CDK9;SUPT16H;CCNT1;GTF2B;TCEA1;NELFCD;SSRP1;GTF2F1;SUPT5H;CDC73		R-HSA-113409;R-HSA-113411;R-HSA-113413;R-HSA-113414;R-HSA-112392;R-HSA-112395;R-HSA-112429;R-HSA-112430;R-HSA-75856;R-HSA-75891;R-HSA-112434;R-HSA-113429;R-HSA-112437;R-HSA-75862;R-HSA-73946
R-HSA-69202	Cyclin E associated events during G1/S transition	10	88	0.00629336	0.00470584	0.028235	14	20	0.00169664	9606	Homo sapiens	PSMD8;PSMA6;PSMD11;PSMA4;PSMB5;PSMA2;PSMD5;CDK2;PSMB1;PSMA7		R-HSA-188386;R-HSA-187552;R-HSA-187520;R-HSA-188390;R-HSA-69191;R-HSA-69195;R-HSA-69199;R-HSA-157906;R-HSA-8848436;R-HSA-187574;R-HSA-187575;R-HSA-8848414;R-HSA-69562;R-HSA-188350
R-HSA-109581	Apoptosis	16	180	0.0128728	0.00472721	0.0283632	23	126	0.0106888	9606	Homo sapiens	PSMD11;CAD;HMGB1;PSMA7;PSMD8;PSMA6;PSMA4;PSMB5;PSMA2;PSMD5;STK26;LMNA;PSMB1;NMT1;DNM1L;PAK2		R-HSA-211715;R-HSA-211651;R-HSA-211650;R-HSA-211712;R-HSA-211239;R-HSA-211207;R-HSA-264865;R-HSA-211206;R-HSA-211716;R-HSA-351948;R-HSA-9029667;R-HSA-211247;R-HSA-211731;R-HSA-211186;R-HSA-211191;R-HSA-211190;R-HSA-141367;R-HSA-211734;R-HSA-266204;R-HSA-211193;R-HSA-211224;R-HSA-211583;R-HSA-350651
R-HSA-1852241	Organelle biogenesis and maintenance	25	335	0.0239577	0.00487487	0.0292492	21	86	0.00729555	9606	Homo sapiens	CCT3;DYNC1H1;CCT2;HSP90AA1;DCTN2;DCTN1;TUBB4B;TUBG1;CKAP5;TUBA4A;NCOR1;TBL1XR1;PPP2R1A;TCP1;CDK1;CCT8;MAPRE1;PRKACA;TNPO1;CCT5;CLASP1;CCT4;PAFAH1B1		R-HSA-5624949;R-HSA-5626228;R-HSA-5624948;R-HSA-5624951;R-HSA-5625424;R-HSA-5626227;R-HSA-5625426;R-HSA-5624125;R-HSA-5626681;R-HSA-5617816;R-HSA-5618328;R-HSA-5624952;R-HSA-5618331;R-HSA-5638009;R-HSA-1592238;R-HSA-5625421;R-HSA-1368140;R-HSA-5626220;R-HSA-5626223;R-HSA-5625416;R-HSA-5626699
R-HSA-9022537	Loss of MECP2 binding ability to the NCoR/SMRT complex	3	8	0.000572	0.00492175	0.0295305	1	1	8.48e-05	9606	Homo sapiens	NCOR2;NCOR1;TBL1XR1		R-HSA-9005585
R-HSA-9005895	Pervasive developmental disorders	4	16	0.00114425	0.00498133	0.029888	2	5	0.000424	9606	Homo sapiens	NCOR2;NCOR1;TBL1XR1;PRKACA		R-HSA-9005561;R-HSA-9005585
R-HSA-9005891	Loss of function of MECP2 in Rett syndrome	4	16	0.00114425	0.00498133	0.029888	2	5	0.000424	9606	Homo sapiens	NCOR2;NCOR1;TBL1XR1;PRKACA		R-HSA-9005561;R-HSA-9005585
R-HSA-6796648	TP53 Regulates Transcription of DNA Repair Genes	10	89	0.00636487	0.00508023	0.0304814	5	17	0.00144214	9606	Homo sapiens	CDK9;SUPT16H;CCNT1;TCEA1;NELFCD;SSRP1;GTF2F1;SUPT5H;DDB2		R-HSA-6806423;R-HSA-6797606;R-HSA-6806417;R-HSA-6797616;R-HSA-6797712
R-HSA-69656	Cyclin A:Cdk2-associated events at S phase entry	10	90	0.00643639	0.00547758	0.0328655	14	19	0.00161181	9606	Homo sapiens	PSMD8;PSMA6;PSMD11;PSMA4;PSMB5;PSMA2;PSMD5;CDK2;PSMB1;PSMA7		R-HSA-187552;R-HSA-187520;R-HSA-174273;R-HSA-174054;R-HSA-187948;R-HSA-187916;R-HSA-187949;R-HSA-8848436;R-HSA-187574;R-HSA-187575;R-HSA-174164;R-HSA-8848414;R-HSA-174110;R-HSA-187934
R-HSA-5607764	CLEC7A (Dectin-1) signaling	12	120	0.00858185	0.00562312	0.0334329	6	45	0.00381744	9606	Homo sapiens	PSMD8;PSMA6;PSMD11;AHCYL1;PSMA4;PSMB5;PSMA2;PSMD5;PSMB1;UBE2N;UBE2V1;PSMA7		R-HSA-169683;R-HSA-202534;R-HSA-5607731;R-HSA-5607757;R-HSA-5607724;R-HSA-5607756
R-HSA-948021	Transport to the Golgi and subsequent modification	18	219	0.0156619	0.00622976	0.0334329	22	60	0.00508992	9606	Homo sapiens	DYNC1H1;SEC13;SEC23A;COPA;DCTN2;DCTN1;SEC16A;TUBB4B;TUBA4A;ARCN1;TFG;PPP6R3;COPG1;SEC24C;COPE;CD55		R-HSA-6807877;R-HSA-5694421;R-HSA-5694418;R-HSA-6807875;R-HSA-203973;R-HSA-6807872;R-HSA-5694417;R-HSA-6809006;R-HSA-5694527;R-HSA-204008;R-HSA-6809003;R-HSA-5694522;R-HSA-5694439;R-HSA-5694436;R-HSA-6809011;R-HSA-6809010;R-HSA-5694435;R-HSA-5694446;R-HSA-5694415;R-HSA-5694413;R-HSA-5694441;R-HSA-5694409
R-HSA-1168372	Downstream signaling events of B Cell Receptor (BCR)	10	92	0.00657942	0.00634491	0.0334329	2	14	0.00118765	9606	Homo sapiens	PSMD8;PSMA6;PSMD11;PSMA4;PSMB5;PSMA2;PSMD5;PSMB1;PPIA;PSMA7		R-HSA-1168640;R-HSA-2025882
R-HSA-5632684	Hedgehog 'on' state	10	92	0.00657942	0.00634491	0.0334329	3	37	0.00313878	9606	Homo sapiens	PSMD8;PSMA6;PSMD11;PSMA4;PSMB5;PSMA2;PSMD5;PSMB1;CDC73;PSMA7		R-HSA-5635845;R-HSA-5635868;R-HSA-5635854
R-HSA-445355	Smooth Muscle Contraction	6	39	0.0027891	0.00668658	0.0334329	6	9	0.000763	9606	Homo sapiens	ANXA1;TPM4;CALD1;CAD;TLN1;PAK2;VCL		R-HSA-445700;R-HSA-445797;R-HSA-445699;R-HSA-5263628;R-HSA-445704;R-HSA-445705
R-HSA-429914	Deadenylation-dependent mRNA decay	8	65	0.0046485	0.00695306	0.0347653	6	10	0.000848	9606	Homo sapiens	EIF4A1;HBS1L;TNKS1BP1;DCP1A;EIF4B;EIF4G1;EDC3;PAIP1		R-HSA-429860;R-HSA-430021;R-HSA-429955;R-HSA-8941312;R-HSA-430028;R-HSA-429992
R-HSA-5357801	Programmed Cell Death	16	188	0.0134449	0.00702145	0.0351073	23	139	0.0117917	9606	Homo sapiens	PSMD11;CAD;HMGB1;PSMA7;PSMD8;PSMA6;PSMA4;PSMB5;PSMA2;PSMD5;STK26;LMNA;PSMB1;NMT1;DNM1L;PAK2		R-HSA-211715;R-HSA-211651;R-HSA-211650;R-HSA-211712;R-HSA-211239;R-HSA-211207;R-HSA-264865;R-HSA-211206;R-HSA-211716;R-HSA-351948;R-HSA-9029667;R-HSA-211247;R-HSA-211731;R-HSA-211186;R-HSA-211191;R-HSA-211190;R-HSA-141367;R-HSA-211734;R-HSA-266204;R-HSA-211193;R-HSA-211224;R-HSA-211583;R-HSA-350651
R-HSA-429947	Deadenylation of mRNA	5	28	0.00200243	0.00710413	0.0355206	4	4	0.000339	9606	Homo sapiens	EIF4A1;TNKS1BP1;EIF4B;EIF4G1;PAIP1		R-HSA-430021;R-HSA-429955;R-HSA-8941312;R-HSA-429992
R-HSA-5632928	Defective Mismatch Repair Associated With MSH2	2	3	0.000215	0.00730828	0.0365414	2	2	0.00017	9606	Homo sapiens	MSH6;MSH3		R-HSA-5577244;R-HSA-5577259
R-HSA-176034	Interactions of Tat with host cellular proteins	2	3	0.000215	0.00730828	0.0365414	2	2	0.00017	9606	Homo sapiens	CDK9;CCNT1		R-HSA-167234;R-HSA-167235
R-HSA-69166	Removal of the Flap Intermediate	4	18	0.00128728	0.00747544	0.0373772	4	4	0.000339	9606	Homo sapiens	PRIM2;FEN1;POLD1;RPA1		R-HSA-69152;R-HSA-69140;R-HSA-69142;R-HSA-69144
R-HSA-8939902	Regulation of RUNX2 expression and activity	9	80	0.00572123	0.0075887	0.0379435	4	32	0.00271463	9606	Homo sapiens	PSMD8;PSMA6;PSMD11;PSMA4;PSMB5;PSMA2;PSMD5;PSMB1;PSMA7		R-HSA-8939801;R-HSA-9008475;R-HSA-9008110;R-HSA-9009362
R-HSA-167172	Transcription of the HIV genome	9	81	0.00579275	0.0081862	0.040931	47	47	0.00398711	9606	Homo sapiens	CDK9;SUPT16H;CCNT1;GTF2B;TCEA1;NELFCD;SSRP1;GTF2F1;SUPT5H		R-HSA-167234;R-HSA-167111;R-HSA-167115;R-HSA-167113;R-HSA-167118;R-HSA-167181;R-HSA-167117;R-HSA-170706;R-HSA-170704;R-HSA-167121;R-HSA-167191;R-HSA-167130;R-HSA-167192;R-HSA-167128;R-HSA-167134;R-HSA-167196;R-HSA-167197;R-HSA-167133;R-HSA-9613490;R-HSA-167459;R-HSA-167072;R-HSA-167136;R-HSA-167076;R-HSA-167077;R-HSA-9613498;R-HSA-167147;R-HSA-167083;R-HSA-167150;R-HSA-167087;R-HSA-167148;R-HSA-1…
R-HSA-499943	Interconversion of nucleotide di- and triphosphates	9	81	0.00579275	0.0081862	0.040931	12	33	0.00279946	9606	Homo sapiens	DUT;RRM1;TXNRD1;NME2;CTPS1;TXN;TYMS;DCTPP1		R-HSA-8866405;R-HSA-73666;R-HSA-73605;R-HSA-111751;R-HSA-6786257;R-HSA-482621;R-HSA-6806877;R-HSA-482619;R-HSA-111804;R-HSA-73647;R-HSA-73646;R-HSA-111742
R-HSA-5696400	Dual Incision in GG-NER	6	41	0.00293213	0.00842394	0.0421197	3	3	0.000254	9606	Homo sapiens	CUL4A;PARP1;POLD1;POLE3;RPA1;DDB2		R-HSA-5690213;R-HSA-5690990;R-HSA-5690988
R-HSA-69183	Processive synthesis on the lagging strand	4	19	0.00135879	0.00898327	0.0449164	6	7	0.000594	9606	Homo sapiens	PRIM2;FEN1;POLD1;RPA1		R-HSA-69152;R-HSA-69140;R-HSA-69127;R-HSA-69142;R-HSA-69144;R-HSA-69116
R-HSA-381119	Unfolded Protein Response (UPR)	14	160	0.0114425	0.00898513	0.0449257	9	95	0.00805904	9606	Homo sapiens	DCTN1;KHSRP;LMNA;ASNS;HDGF;TPP1;TLN1;EIF2S1;EIF2A		R-HSA-381111;R-HSA-1791128;R-HSA-1791112;R-HSA-517731;R-HSA-1791118;R-HSA-1791138;R-HSA-1791137;R-HSA-381128;R-HSA-1791092
R-HSA-76005	Response to elevated platelet cytosolic Ca2+	13	144	0.0102982	0.00910641	0.045532	6	14	0.00118765	9606	Homo sapiens	PRPF38B;WDR1;ANXA5;ACTN4;TUBA4A;CFL1;TAGLN2;TLN1;ALDOA;PRKACA;PFN1;PPIA;VCL		R-HSA-482775;R-HSA-482772;R-HSA-481007;R-HSA-114553;R-HSA-114683;R-HSA-114684
R-HSA-351202	Metabolism of polyamines	13	144	0.0102982	0.00910641	0.045532	5	38	0.00322362	9606	Homo sapiens	PSMD11;GOT1;PSMA7;SRM;PSMD8;PSMA6;PSMA4;PSMB5;CPS1;PSMA2;PSMD5;PSMB1;SMS		R-HSA-353125;R-HSA-351215;R-HSA-70555;R-HSA-1237102;R-HSA-351210
R-HSA-2262749	Cellular response to hypoxia	9	83	0.00593578	0.00948783	0.0474391	1	20	0.00169664	9606	Homo sapiens	PSMD8;PSMA6;PSMD11;PSMA4;PSMB5;PSMA2;PSMD5;PSMB1;PSMA7		R-HSA-1234159
R-HSA-1234174	Regulation of Hypoxia-inducible Factor (HIF) by oxygen	9	83	0.00593578	0.00948783	0.0474391	1	20	0.00169664	9606	Homo sapiens	PSMD8;PSMA6;PSMD11;PSMA4;PSMB5;PSMA2;PSMD5;PSMB1;PSMA7		R-HSA-1234159
R-HSA-9006936	Signaling by TGF-beta family members	11	114	0.00815276	0.0100171	0.0500853	15	107	0.00907703	9606	Homo sapiens	NCOR2;CDK9;NCOR1;XPO1;CCNT1;PARP1;STRAP;NEDD8;MIF;FSTL1;UCHL5		R-HSA-2128994;R-HSA-2187330;R-HSA-178215;R-HSA-2127562;R-HSA-173481;R-HSA-8858346;R-HSA-4332236;R-HSA-201810;R-HSA-2186741;R-HSA-2167924;R-HSA-2176475;R-HSA-2179291;R-HSA-2186747;R-HSA-2179293;R-HSA-2187325
R-HSA-110314	Recognition of DNA damage by PCNA-containing replication complex	5	31	0.00221698	0.0106821	0.0534103	5	6	0.000509	9606	Homo sapiens	CUL4A;POLD1;POLE3;RPA1;RAD18		R-HSA-5652005;R-HSA-5655466;R-HSA-5651992;R-HSA-5655481;R-HSA-5652009
R-HSA-170834	Signaling by TGF-beta Receptor Complex	9	85	0.00607881	0.01094	0.0546999	13	82	0.00695623	9606	Homo sapiens	NCOR2;CDK9;NCOR1;XPO1;CCNT1;PARP1;STRAP;NEDD8;UCHL5		R-HSA-2128994;R-HSA-2187330;R-HSA-178215;R-HSA-2127562;R-HSA-173481;R-HSA-4332236;R-HSA-2186741;R-HSA-2167924;R-HSA-2176475;R-HSA-2179291;R-HSA-2186747;R-HSA-2179293;R-HSA-2187325
R-HSA-9010642	ROBO receptors bind AKAP5	3	11	0.000787	0.0116672	0.0583358	4	7	0.000594	9606	Homo sapiens	PRKACA		R-HSA-9010681;R-HSA-9010641;R-HSA-9010643;R-HSA-9010646
R-HSA-446343	Localization of the PINCH-ILK-PARVIN complex to focal adhesions	2	4	0.000286	0.0126388	0.0631941	2	2	0.00017	9606	Homo sapiens	ILK;PARVA		R-HSA-446322;R-HSA-432897
R-HSA-5621481	C-type lectin receptors (CLRs)	16	202	0.0144461	0.013124	0.0656201	10	68	0.00576858	9606	Homo sapiens	AHCYL1;PSMD11;PSMA7;PSMD8;PSMA6;PSMA4;PSMB5;PSMA2;PSMD5;PSMB1;UBE2N;FYN;UBE2V1;PRKACA;PAK2		R-HSA-169683;R-HSA-5624486;R-HSA-202534;R-HSA-5607731;R-HSA-5607757;R-HSA-5607724;R-HSA-5607756;R-HSA-5624492;R-HSA-5624473;R-HSA-5621355
R-HSA-449147	Signaling by Interleukins	39	640	0.0457699	0.0145799	0.0694105	27	491	0.0416525	9606	Homo sapiens	LAMA5;PSMD11;HMGB1;PSMA7;PSMD8;PSMB5;PSMD5;PPP2R1A;CFL1;PSMB1;FYN;PRKACA;PAK2;HSP90AA1;ANXA1;GSTO1;TALDO1;MSN;MIF;PSMA6;PSMA4;PSMA2;TCP1;FSCN1;UBE2N;UBE2V1;PPIA		R-HSA-6785895;R-HSA-8950218;R-HSA-8950732;R-HSA-450187;R-HSA-199959;R-HSA-8948063;R-HSA-8950367;R-HSA-8950175;R-HSA-446877;R-HSA-451418;R-HSA-879917;R-HSA-168166;R-HSA-209061;R-HSA-913451;R-HSA-8950190;R-HSA-8948015;R-HSA-450337;R-HSA-8948066;R-HSA-450346;R-HSA-8950328;R-HSA-8950718;R-HSA-912629;R-HSA-168184;R-HSA-8948018;R-HSA-8950581;R-HSA-912627;R-HSA-6790041
R-HSA-190840	Microtubule-dependent trafficking of connexons from Golgi to the plasma membrane	4	22	0.00157334	0.014651	0.0694105	1	2	0.00017	9606	Homo sapiens	TUBB4B;TUBA4A		R-HSA-190520
R-HSA-5210891	Uptake and function of anthrax toxins	4	22	0.00157334	0.014651	0.0694105	8	19	0.00161181	9606	Homo sapiens	PDCD6IP;MAP2K2;ANTXR1		R-HSA-5210943;R-HSA-5210909;R-HSA-5211356;R-HSA-5210923;R-HSA-5210921;R-HSA-5210935;R-HSA-5210947;R-HSA-5210944
R-HSA-5683057	MAPK family signaling cascades	23	331	0.0236716	0.0146528	0.0694105	33	86	0.00729555	9606	Homo sapiens	MAP2K2;PSMD11;PEBP1;RASAL2;PSMA7;PSMD8;DNAJB1;PSMA6;XPO1;PSMA4;PSMB5;PSMA2;PSMD5;PPP2R1A;AGO2;PSMB1;CDK1;FYN;TLN1;PRKACA;PAK2;VCL		R-HSA-5672980;R-HSA-5674132;R-HSA-5672978;R-HSA-5674130;R-HSA-5692755;R-HSA-5675417;R-HSA-5672965;R-HSA-5674373;R-HSA-5687109;R-HSA-5690245;R-HSA-5658435;R-HSA-5674496;R-HSA-5672961;R-HSA-112342;R-HSA-389788;R-HSA-5672972;R-HSA-5672973;R-HSA-5690250;R-HSA-5687112;R-HSA-5672969;R-HSA-5687113;R-HSA-5658231;R-HSA-109858;R-HSA-5687088;R-HSA-109862;R-HSA-5658430;R-HSA-5674366;R-HSA-109864;R-HSA-568710…
R-HSA-5625970	RHO GTPases activate KTN1	3	12	0.000858	0.0146905	0.0694105	2	2	0.00017	9606	Homo sapiens	KIF5B;KLC1;KTN1		R-HSA-5625959;R-HSA-5672083
R-HSA-69481	G2/M Checkpoints	13	154	0.0110134	0.0150699	0.0694105	12	24	0.00203597	9606	Homo sapiens	PSMD11;RPA1;PSMA7;PSMD8;PSMA6;PSMA4;PSMB5;PSMA2;PSMD5;CDK2;PSMB1;UBE2N;CDK1		R-HSA-5683735;R-HSA-69891;R-HSA-6799332;R-HSA-170070;R-HSA-8852354;R-HSA-170055;R-HSA-176101;R-HSA-176250;R-HSA-176298;R-HSA-176264;R-HSA-176318;R-HSA-176175
R-HSA-381038	XBP1(S) activates chaperone genes	10	106	0.00758063	0.0157457	0.0694105	5	48	0.00407194	9606	Homo sapiens	DCTN1;LMNA;HDGF;TPP1;TLN1		R-HSA-1791128;R-HSA-1791112;R-HSA-1791138;R-HSA-1791137;R-HSA-1791092
R-HSA-164378	PKA activation in glucagon signalling	4	23	0.00164485	0.0169454	0.0694105	2	2	0.00017	9606	Homo sapiens	GNAS;PRKACA		R-HSA-111925;R-HSA-164377
R-HSA-5358508	Mismatch Repair	4	23	0.00164485	0.0169454	0.0694105	15	17	0.00144214	9606	Homo sapiens	MSH6;MSH3;POLD1;RPA1		R-HSA-5358545;R-HSA-5358513;R-HSA-5358512;R-HSA-5358579;R-HSA-5358519;R-HSA-5358518;R-HSA-5358619;R-HSA-5358525;R-HSA-5444511;R-HSA-5358912;R-HSA-5358597;R-HSA-5358599;R-HSA-5358919;R-HSA-5444516;R-HSA-5358510
R-HSA-4419969	Depolymerisation of the Nuclear Lamina	4	23	0.00164485	0.0169454	0.0694105	4	6	0.000509	9606	Homo sapiens	LMNA;CDK1;PRKACA		R-HSA-5229194;R-HSA-5195402;R-HSA-5223304;R-HSA-5244669
R-HSA-190872	Transport of connexons to the plasma membrane	4	23	0.00164485	0.0169454	0.0694105	1	3	0.000254	9606	Homo sapiens	TUBB4B;TUBA4A		R-HSA-190520
R-HSA-8956320	Nucleobase biosynthesis	7	62	0.00443396	0.0171577	0.0694105	10	23	0.00195114	9606	Homo sapiens	ADSL;IMPDH1;IMPDH2;CAD;GMPS;PAICS;PFAS		R-HSA-73792;R-HSA-73571;R-HSA-73794;R-HSA-73573;R-HSA-73828;R-HSA-73812;R-HSA-73577;R-HSA-73800;R-HSA-73805;R-HSA-73806
R-HSA-73884	Base Excision Repair	7	62	0.00443396	0.0171577	0.0694105	34	87	0.00738039	9606	Homo sapiens	FEN1;PARP1;NTHL1;APEX1;POLD1;POLE3;RPA1		R-HSA-110208;R-HSA-110211;R-HSA-110213;R-HSA-110212;R-HSA-5649873;R-HSA-5651805;R-HSA-110349;R-HSA-5651739;R-HSA-5649883;R-HSA-110351;R-HSA-110350;R-HSA-5651782;R-HSA-110353;R-HSA-110352;R-HSA-110224;R-HSA-110227;R-HSA-110355;R-HSA-110226;R-HSA-110354;R-HSA-110229;R-HSA-111253;R-HSA-110356;R-HSA-5649856;R-HSA-110359;R-HSA-110360;R-HSA-110363;R-HSA-110364;R-HSA-5651723;R-HSA-110368;R-HSA-110371;R-…
R-HSA-5696399	Global Genome Nucleotide Excision Repair (GG-NER)	9	92	0.00657942	0.0173526	0.0694105	17	20	0.00169664	9606	Homo sapiens	COPS4;CUL4A;PARP1;COPS2;POLD1;POLE3;RPA1;UBE2N;DDB2		R-HSA-5690996;R-HSA-5690997;R-HSA-5691006;R-HSA-5696670;R-HSA-5696664;R-HSA-5691000;R-HSA-5691001;R-HSA-6790487;R-HSA-6790454;R-HSA-5690213;R-HSA-5689317;R-HSA-5689861;R-HSA-5690990;R-HSA-6782943;R-HSA-5690991;R-HSA-5696655;R-HSA-5690988
R-HSA-9013694	Signaling by NOTCH4	9	92	0.00657942	0.0173526	0.0694105	1	20	0.00169664	9606	Homo sapiens	PSMD8;PSMA6;PSMD11;PSMA4;PSMB5;PSMA2;PSMD5;PSMB1;PSMA7		R-HSA-9604642
R-HSA-202424	Downstream TCR signaling	11	124	0.00886791	0.0175443	0.0701773	3	24	0.00203597	9606	Homo sapiens	PSMD8;PSMA6;PSMD11;PSMA4;PSMB5;PSMA2;PSMD5;PSMB1;UBE2N;UBE2V1;PSMA7		R-HSA-202534;R-HSA-202453;R-HSA-5607724
R-HSA-382556	ABC-family proteins mediated transport	11	124	0.00886791	0.0175443	0.0701773	2	28	0.0023753	9606	Homo sapiens	PSMD8;PSMA6;EIF2S3;PSMD11;PSMA4;PSMB5;PSMA2;PSMD5;PSMB1;EIF2S1;PSMA7;EIF2A		R-HSA-8866553;R-HSA-5227009
R-HSA-73817	Purine ribonucleoside monophosphate biosynthesis	6	49	0.00350425	0.0186444	0.0745777	7	17	0.00144214	9606	Homo sapiens	ADSL;IMPDH1;IMPDH2;GMPS;PAICS;PFAS		R-HSA-73792;R-HSA-73794;R-HSA-73828;R-HSA-73812;R-HSA-73800;R-HSA-73805;R-HSA-73806
R-HSA-5423599	Diseases of Mismatch Repair (MMR)	2	5	0.000358	0.0192125	0.0768499	4	6	0.000509	9606	Homo sapiens	MSH6;MSH3		R-HSA-5578663;R-HSA-5577244;R-HSA-5577259;R-HSA-5632970
R-HSA-381070	IRE1alpha activates chaperones	10	110	0.00786669	0.0197397	0.0789588	5	54	0.00458093	9606	Homo sapiens	DCTN1;LMNA;HDGF;TPP1;TLN1		R-HSA-1791128;R-HSA-1791112;R-HSA-1791138;R-HSA-1791137;R-HSA-1791092
R-HSA-3299685	Detoxification of Reactive Oxygen Species	7	65	0.0046485	0.0215132	0.0860528	6	34	0.00288429	9606	Homo sapiens	PRDX2;TXNRD2;PRDX1;TXNRD1;GPX8;TXN;PRDX6		R-HSA-3697882;R-HSA-3341296;R-HSA-3343700;R-HSA-3323050;R-HSA-3341343;R-HSA-73646
R-HSA-389977	Post-chaperonin tubulin folding pathway	4	25	0.00178788	0.0221767	0.0887066	9	9	0.000763	9606	Homo sapiens	TUBB4B;TUBA4A		R-HSA-389972;R-HSA-389956;R-HSA-389974;R-HSA-389969;R-HSA-389955;R-HSA-389964;R-HSA-389976;R-HSA-389963;R-HSA-389978
R-HSA-71291	Metabolism of amino acids and derivatives	39	660	0.0472002	0.0223991	0.0895965	20	283	0.0240075	9606	Homo sapiens	PSMD11;AHCY;PYCRL;EPRS;PSMA7;SRM;PSMD8;PSMB5;RPS18;LARS;PSMD5;RARS;PSMB1;RPS3;RPL38;PHGDH;RPS12;DARS;GOT1;TXNRD1;ASNS;SARS;RPSA;AIMP1;AIMP2;RPS25;PSMA6;PSMA4;QARS;KARS;CPS1;PSMA2;PSAT1;MARS;SMS;RPS20;IARS;EEF1E1;RPS21		R-HSA-353125;R-HSA-70592;R-HSA-174401;R-HSA-2408546;R-HSA-70599;R-HSA-977348;R-HSA-2408526;R-HSA-351215;R-HSA-2408558;R-HSA-5263614;R-HSA-351210;R-HSA-2408532;R-HSA-5263616;R-HSA-6783955;R-HSA-70581;R-HSA-2408529;R-HSA-70555;R-HSA-977333;R-HSA-1237102;R-HSA-5333615
R-HSA-174417	Telomere C-strand (Lagging Strand) Synthesis	5	38	0.00271759	0.0233894	0.0935578	12	14	0.00118765	9606	Homo sapiens	PRIM2;FEN1;POLD1;POLE3;RPA1		R-HSA-174451;R-HSA-174448;R-HSA-174438;R-HSA-174452;R-HSA-174427;R-HSA-174456;R-HSA-174441;R-HSA-174425;R-HSA-174446;R-HSA-176702;R-HSA-174444;R-HSA-174445
R-HSA-15869	Metabolism of nucleotides	18	254	0.0181649	0.0241228	0.0964911	26	135	0.0114523	9606	Homo sapiens	DUT;ADSL;RRM1;TXNRD1;CAD;NME2;GMPS;CTPS1;TXN;TYMS;PAICS;PFAS;IMPDH1;IMPDH2;HPRT1;DCTPP1;ITPA		R-HSA-73792;R-HSA-73666;R-HSA-73794;R-HSA-73605;R-HSA-111751;R-HSA-73800;R-HSA-73805;R-HSA-73806;R-HSA-73812;R-HSA-2509831;R-HSA-73571;R-HSA-8866405;R-HSA-73573;R-HSA-2509827;R-HSA-73828;R-HSA-74215;R-HSA-73577;R-HSA-2509838;R-HSA-73647;R-HSA-73646;R-HSA-6786257;R-HSA-482621;R-HSA-6806877;R-HSA-482619;R-HSA-111804;R-HSA-111742
R-HSA-3858494	Beta-catenin independent WNT signaling	13	165	0.0118	0.0246605	0.0986422	11	51	0.00432643	9606	Homo sapiens	PSMD11;PSMA7;PSMD8;PSMA6;PSMA4;PSMB5;PSMA2;PSMD5;AGO2;PSMB1;GNB4;PRKACA;PFN1		R-HSA-4608855;R-HSA-4332390;R-HSA-3965450;R-HSA-398193;R-HSA-3965444;R-HSA-4518575;R-HSA-3965447;R-HSA-4518585;R-HSA-3965441;R-HSA-5138432;R-HSA-398040
R-HSA-5619084	ABC transporter disorders	9	98	0.00700851	0.024733	0.0989318	1	22	0.0018663	9606	Homo sapiens	PSMD8;PSMA6;PSMD11;PSMA4;PSMB5;PSMA2;PSMD5;PSMB1;PSMA7		R-HSA-8866858
R-HSA-69186	Lagging Strand Synthesis	4	26	0.0018594	0.0251225	0.10049	10	11	0.000933	9606	Homo sapiens	PRIM2;FEN1;POLD1;RPA1		R-HSA-69152;R-HSA-69074;R-HSA-69140;R-HSA-69127;R-HSA-69063;R-HSA-69142;R-HSA-69144;R-HSA-69053;R-HSA-69116;R-HSA-69068
R-HSA-9022692	Regulation of MECP2 expression and activity	5	39	0.0027891	0.025761	0.103044	5	14	0.00118765	9606	Homo sapiens	NCOR2;NCOR1;TBL1XR1;AGO2;PRKACA		R-HSA-8986937;R-HSA-8986939;R-HSA-9021183;R-HSA-9021182;R-HSA-9615501
R-HSA-156902	Peptide chain elongation	9	99	0.00708003	0.0261509	0.104604	5	5	0.000424	9606	Homo sapiens	RPS25;RPS18;RPS3;RPL38;RPS20;RPSA;EEF2;RPS21;RPS12		R-HSA-156930;R-HSA-156915;R-HSA-156912;R-HSA-156923;R-HSA-156907
R-HSA-174437	Removal of the Flap Intermediate from the C-strand	3	15	0.00107273	0.0261857	0.104743	4	4	0.000339	9606	Homo sapiens	FEN1;POLD1;RPA1		R-HSA-174451;R-HSA-174441;R-HSA-174446;R-HSA-174445
R-HSA-110362	POLB-Dependent Long Patch Base Excision Repair	3	15	0.00107273	0.0261857	0.104743	6	10	0.000848	9606	Homo sapiens	FEN1;PARP1;APEX1		R-HSA-5651782;R-HSA-5651828;R-HSA-5649873;R-HSA-5651739;R-HSA-5651723;R-HSA-5649883
R-HSA-6802952	Signaling by BRAF and RAF fusions	7	68	0.00486305	0.0265818	0.106327	5	5	0.000424	9606	Homo sapiens	MAP2K2;LMNA;TRIM24;PEBP1;TLN1;VCL;QKI		R-HSA-6802935;R-HSA-6802934;R-HSA-6802933;R-HSA-6802932;R-HSA-6802927
R-HSA-75153	Apoptotic execution phase	6	54	0.00386183	0.0281562	0.112625	18	57	0.00483543	9606	Homo sapiens	STK26;CAD;LMNA;HMGB1;DNM1L;PAK2		R-HSA-211651;R-HSA-211650;R-HSA-211712;R-HSA-211239;R-HSA-211207;R-HSA-264865;R-HSA-211206;R-HSA-351948;R-HSA-9029667;R-HSA-211247;R-HSA-211186;R-HSA-211191;R-HSA-211190;R-HSA-266204;R-HSA-211193;R-HSA-211224;R-HSA-211583;R-HSA-350651
R-HSA-168255	Influenza Life Cycle	14	186	0.0133019	0.0282743	0.113097	10	52	0.00441127	9606	Homo sapiens	HSP90AA1;RPSA;GTF2F1;IPO5;RPS25;XPO1;RPS18;TPR;RPS3;RPL38;RPS20;RPS21;HSPA1B;RPS12		R-HSA-192627;R-HSA-192704;R-HSA-168880;R-HSA-168337;R-HSA-168326;R-HSA-192746;R-HSA-192841;R-HSA-168857;R-HSA-192830;R-HSA-192925
R-HSA-163359	Glucagon signaling in metabolic regulation	5	40	0.00286062	0.0282812	0.113125	5	6	0.000509	9606	Homo sapiens	GNAS;GNB4;PRKACA		R-HSA-163617;R-HSA-825631;R-HSA-111925;R-HSA-164377;R-HSA-381704
R-HSA-5696394	DNA Damage Recognition in GG-NER	5	40	0.00286062	0.0282812	0.113125	4	5	0.000424	9606	Homo sapiens	COPS4;CUL4A;PARP1;COPS2;DDB2		R-HSA-6782943;R-HSA-5691006;R-HSA-5696655;R-HSA-5696664
R-HSA-8951664	Neddylation	17	241	0.0172352	0.0288881	0.115552	30	31	0.00262979	9606	Homo sapiens	PSMD11;NEDD8;LMO7;PSMA7;DDB2;COPS4;CUL4A;PSMD8;PSMA6;CAND1;PSMA4;COMMD9;PSMB5;PSMA2;PSMD5;COPS2;PSMB1		R-HSA-8956040;R-HSA-8956106;R-HSA-8956045;R-HSA-8956099;R-HSA-8951751;R-HSA-8956103;R-HSA-8956184;R-HSA-8955289;R-HSA-8951644;R-HSA-8956050;R-HSA-8951764;R-HSA-8955285;R-HSA-8951766;R-HSA-8951656;R-HSA-8956200;R-HSA-8955241;R-HSA-8952618;R-HSA-8956140;R-HSA-8952620;R-HSA-8952044;R-HSA-8955245;R-HSA-8951661;R-HSA-8951648;R-HSA-5690808;R-HSA-8952039;R-HSA-8956025;R-HSA-8956026;R-HSA-8952638;R-HSA-8…
R-HSA-8878159	Transcriptional regulation by RUNX3	10	118	0.00843882	0.0298721	0.119488	4	47	0.00398711	9606	Homo sapiens	PSMD8;PSMA6;PSMD11;PSMA4;PSMB5;PSMA2;PSMD5;PSMB1;TEAD1;PSMA7		R-HSA-8952408;R-HSA-8951676;R-HSA-8951695;R-HSA-1989766
R-HSA-437239	Recycling pathway of L1	6	55	0.00393335	0.030381	0.121524	7	14	0.00118765	9606	Homo sapiens	MSN;TUBB4B;TUBA4A;DNM2		R-HSA-374677;R-HSA-555065;R-HSA-445077;R-HSA-443779;R-HSA-445089;R-HSA-445071;R-HSA-374680
R-HSA-5620920	Cargo trafficking to the periciliary membrane	6	55	0.00393335	0.030381	0.121524	1	27	0.00229047	9606	Homo sapiens	CCT3;CCT2;TCP1;CCT8;CCT5;CCT4		R-HSA-5624125
R-HSA-2995410	Nuclear Envelope Reassembly	3	16	0.00114425	0.0308304	0.123321	2	3	0.000254	9606	Homo sapiens	PPP2R1A;LMNA		R-HSA-2995388;R-HSA-2995376
R-HSA-2995383	Initiation of Nuclear Envelope Reformation	3	16	0.00114425	0.0308304	0.123321	2	3	0.000254	9606	Homo sapiens	PPP2R1A;LMNA		R-HSA-2995388;R-HSA-2995376
R-HSA-5696398	Nucleotide Excision Repair	10	119	0.00851033	0.031357	0.125428	30	36	0.00305395	9606	Homo sapiens	COPS4;CUL4A;PARP1;COPS2;POLD1;POLE3;RPA1;UBE2N;TCEA1;DDB2		R-HSA-5696670;R-HSA-6781867;R-HSA-5696664;R-HSA-6790454;R-HSA-6782069;R-HSA-6782004;R-HSA-5689861;R-HSA-6782131;R-HSA-5696655;R-HSA-6782141;R-HSA-6782204;R-HSA-6782138;R-HSA-5690996;R-HSA-5690997;R-HSA-6782211;R-HSA-6782208;R-HSA-5691006;R-HSA-6781833;R-HSA-5691000;R-HSA-5691001;R-HSA-6790487;R-HSA-5690213;R-HSA-5689317;R-HSA-6782227;R-HSA-6782224;R-HSA-5690990;R-HSA-6782943;R-HSA-5690991;R-HSA-5…
R-HSA-114608	Platelet degranulation	11	137	0.00979761	0.0327931	0.131172	3	11	0.000933	9606	Homo sapiens	WDR1;CFL1;ANXA5;TAGLN2;ACTN4;TLN1;ALDOA;PFN1;PPIA;TUBA4A;VCL		R-HSA-482775;R-HSA-482772;R-HSA-481007
R-HSA-6802957	Oncogenic MAPK signaling	8	87	0.00622184	0.0328744	0.131498	25	34	0.00288429	9606	Homo sapiens	MAP2K2;LMNA;TRIM24;PEBP1;RASAL2;TLN1;VCL;QKI		R-HSA-6802919;R-HSA-6802918;R-HSA-6802916;R-HSA-6802914;R-HSA-6803234;R-HSA-6803233;R-HSA-6802912;R-HSA-6802927;R-HSA-6802926;R-HSA-6802925;R-HSA-6802924;R-HSA-6802922;R-HSA-6802921;R-HSA-6802935;R-HSA-6802934;R-HSA-6802933;R-HSA-6802932;R-HSA-6802943;R-HSA-6802942;R-HSA-6802941;R-HSA-6802834;R-HSA-6802911;R-HSA-6802910;R-HSA-6803230;R-HSA-6803227
R-HSA-5668541	TNFR2 non-canonical NF-kB pathway	9	104	0.0074376	0.0341086	0.136435	3	43	0.00364778	9606	Homo sapiens	PSMD8;PSMA6;PSMD11;PSMA4;PSMB5;PSMA2;PSMD5;PSMB1;PSMA7		R-HSA-5607731;R-HSA-5668481;R-HSA-5668520
R-HSA-199991	Membrane Trafficking	38	661	0.0472717	0.0342144	0.136857	82	218	0.0184934	9606	Homo sapiens	SEC23A;COPA;DCTN2;DCTN1;GDI2;GOLIM4;NEDD8;KIF11;KLC1;TFG;KIF5B;PPP6R3;PACSIN2;SNX9;CD55;TPD52;DYNC1H1;SEC13;GALNT1;SEC16A;TUBB4B;PUM1;TUBA4A;DNM2;ARCN1;COPS4;KIF2A;ALPP;COPS2;COPG1;SEC24C;PAFAH1B3;COPE;PAFAH1B2;PAFAH1B1		R-HSA-8868230;R-HSA-5694421;R-HSA-5694418;R-HSA-8847875;R-HSA-5694417;R-HSA-8868236;R-HSA-8877451;R-HSA-8847635;R-HSA-2316347;R-HSA-8876191;R-HSA-8876190;R-HSA-5694415;R-HSA-5694413;R-HSA-8876188;R-HSA-8871194;R-HSA-8871193;R-HSA-5694409;R-HSA-190877;R-HSA-8876454;R-HSA-6807877;R-HSA-8876837;R-HSA-6807875;R-HSA-8877475;R-HSA-8876193;R-HSA-6807872;R-HSA-8877998;R-HSA-8877612;R-HSA-8868651;R-HSA-88…
R-HSA-5621575	CD209 (DC-SIGN) signaling	4	29	0.00207395	0.0353185	0.141274	3	11	0.000933	9606	Homo sapiens	FYN;PRKACA;PAK2		R-HSA-5624486;R-HSA-5624492;R-HSA-5624473
R-HSA-163358	PKA-mediated phosphorylation of key metabolic factors	2	7	0.000501	0.0356518	0.142607	3	5	0.000424	9606	Homo sapiens	PRKACA		R-HSA-163672;R-HSA-163676;R-HSA-163773
R-HSA-8939236	RUNX1 regulates transcription of genes involved in differentiation of HSCs	9	106	0.00758063	0.0377143	0.150857	1	15	0.00127248	9606	Homo sapiens	PSMD8;PSMA6;PSMD11;PSMA4;PSMB5;PSMA2;PSMD5;PSMB1;PSMA7		R-HSA-8957265
R-HSA-73893	DNA Damage Bypass	6	58	0.00414789	0.0377338	0.150935	29	34	0.00288429	9606	Homo sapiens	CUL4A;USP10;POLD1;POLE3;RPA1;RAD18		R-HSA-5655892;R-HSA-5656148;R-HSA-5653780;R-HSA-5653840;R-HSA-5656158;R-HSA-5655965;R-HSA-5653786;R-HSA-5655835;R-HSA-5651992;R-HSA-5653766;R-HSA-5653838;R-HSA-5654989;R-HSA-5654986;R-HSA-5653770;R-HSA-5654985;R-HSA-5652151;R-HSA-110307;R-HSA-110308;R-HSA-110311;R-HSA-5653756;R-HSA-110317;R-HSA-5653754;R-HSA-110316;R-HSA-110319;R-HSA-5655481;R-HSA-5652005;R-HSA-5655466;R-HSA-5652009;R-HSA-5656105
R-HSA-168254	Influenza Infection	14	197	0.0140885	0.0421922	0.168769	11	60	0.00508992	9606	Homo sapiens	HSP90AA1;RPSA;GTF2F1;IPO5;RPS25;XPO1;RPS18;TPR;RPS3;RPL38;RPS20;RPS21;HSPA1B;RPS12		R-HSA-192627;R-HSA-192704;R-HSA-168880;R-HSA-168337;R-HSA-168326;R-HSA-192746;R-HSA-1176059;R-HSA-192841;R-HSA-168857;R-HSA-192830;R-HSA-192925
R-HSA-163685	Integration of energy metabolism	11	143	0.0102267	0.0423215	0.169286	32	65	0.00551408	9606	Homo sapiens	ACLY;AHCYL1;PPP2R1A;GNAS;GNB4;TALDO1;TKT;PRKACA		R-HSA-381644;R-HSA-400015;R-HSA-381704;R-HSA-381707;R-HSA-381706;R-HSA-169683;R-HSA-825631;R-HSA-381713;R-HSA-265682;R-HSA-164056;R-HSA-163672;R-HSA-400092;R-HSA-164377;R-HSA-163676;R-HSA-163741;R-HSA-381607;R-HSA-163617;R-HSA-400037;R-HSA-163750;R-HSA-163751;R-HSA-400097;R-HSA-400046;R-HSA-381612;R-HSA-163688;R-HSA-163689;R-HSA-399978;R-HSA-111925;R-HSA-422320;R-HSA-163764;R-HSA-163770;R-HSA-163…
R-HSA-180786	Extension of Telomeres	5	45	0.00321819	0.043185	0.17274	12	21	0.00178147	9606	Homo sapiens	PRIM2;FEN1;POLD1;POLE3;RPA1		R-HSA-174451;R-HSA-174448;R-HSA-174438;R-HSA-174452;R-HSA-174427;R-HSA-174456;R-HSA-174441;R-HSA-174425;R-HSA-174446;R-HSA-176702;R-HSA-174444;R-HSA-174445
R-HSA-8863678	Neurodegenerative Diseases	4	31	0.00221698	0.0432651	0.17306	5	22	0.0018663	9606	Homo sapiens	CAST;PRDX2;PRDX1;LMNA		R-HSA-8868567;R-HSA-8868134;R-HSA-8863012;R-HSA-8868573;R-HSA-8868344
R-HSA-8862803	Deregulated CDK5 triggers multiple neurodegenerative pathways in Alzheimer's disease models	4	31	0.00221698	0.0432651	0.17306	5	22	0.0018663	9606	Homo sapiens	CAST;PRDX2;PRDX1;LMNA		R-HSA-8868567;R-HSA-8868134;R-HSA-8863012;R-HSA-8868573;R-HSA-8868344
R-HSA-446652	Interleukin-1 family signaling	12	162	0.0115855	0.0443363	0.177345	10	78	0.0066169	9606	Homo sapiens	PSMD8;PSMA6;PSMD11;PSMA4;PSMB5;PSMA2;PSMD5;PSMB1;UBE2N;HMGB1;UBE2V1;PSMA7		R-HSA-168166;R-HSA-209061;R-HSA-8948063;R-HSA-8948015;R-HSA-168184;R-HSA-8948066;R-HSA-8948018;R-HSA-446877;R-HSA-451418;R-HSA-450187
R-HSA-71336	Pentose phosphate pathway	5	46	0.00328971	0.0466372	0.186549	11	20	0.00169664	9606	Homo sapiens	PRPS1;TALDO1;PGD;TKT;PGM1		R-HSA-71299;R-HSA-8982667;R-HSA-163751;R-HSA-163764;R-HSA-6787329;R-HSA-71335;R-HSA-71334;R-HSA-73580;R-HSA-71324;R-HSA-111215;R-HSA-163741
R-HSA-446353	Cell-extracellular matrix interactions	3	19	0.00135879	0.0471574	0.188629	5	10	0.000848	9606	Homo sapiens	VASP;ILK;PARVA		R-HSA-446391;R-HSA-446372;R-HSA-446322;R-HSA-432897;R-HSA-446364
R-HSA-69273	Cyclin A/B1/B2 associated events during G2/M transition	4	32	0.00228849	0.0475847	0.190339	22	25	0.0021208	9606	Homo sapiens	XPO1;PPP2R1A;CDK2;CDK1		R-HSA-170055;R-HSA-170087;R-HSA-170116;R-HSA-170084;R-HSA-4088024;R-HSA-170088;R-HSA-170057;R-HSA-170153;R-HSA-170158;R-HSA-170126;R-HSA-170156;R-HSA-8856951;R-HSA-170131;R-HSA-4088141;R-HSA-170161;R-HSA-170070;R-HSA-8856945;R-HSA-170072;R-HSA-69754;R-HSA-69756;R-HSA-170044;R-HSA-170076
R-HSA-5696395	Formation of Incision Complex in GG-NER	5	47	0.00336122	0.0502488	0.19662	8	10	0.000848	9606	Homo sapiens	CUL4A;PARP1;RPA1;UBE2N;DDB2		R-HSA-6790487;R-HSA-6790454;R-HSA-5690996;R-HSA-5689317;R-HSA-5689861;R-HSA-5696670;R-HSA-5690991;R-HSA-5691000
R-HSA-174414	Processive synthesis on the C-strand of the telomere	3	20	0.00143031	0.0533743	0.19662	7	7	0.000594	9606	Homo sapiens	FEN1;POLD1;RPA1		R-HSA-174451;R-HSA-174438;R-HSA-174456;R-HSA-174441;R-HSA-174446;R-HSA-174444;R-HSA-174445
R-HSA-194441	Metabolism of non-coding RNA	6	64	0.00457699	0.0556102	0.19662	6	6	0.000509	9606	Homo sapiens	PRMT5;GLOD4;TPR;GEMIN4;DDX20;GEMIN5;PHAX		R-HSA-191763;R-HSA-191825;R-HSA-191830;R-HSA-191786;R-HSA-191784;R-HSA-191790
R-HSA-191859	snRNP Assembly	6	64	0.00457699	0.0556102	0.19662	6	6	0.000509	9606	Homo sapiens	PRMT5;GLOD4;TPR;GEMIN4;DDX20;GEMIN5;PHAX		R-HSA-191763;R-HSA-191825;R-HSA-191830;R-HSA-191786;R-HSA-191784;R-HSA-191790
R-HSA-426486	Small interfering RNA (siRNA) biogenesis	2	9	0.000644	0.0558196	0.19662	5	5	0.000424	9606	Homo sapiens	AGO2;TSN		R-HSA-9023912;R-HSA-2106625;R-HSA-426464;R-HSA-2106615;R-HSA-9023909
R-HSA-164944	Nef and signal transduction	2	9	0.000644	0.0558196	0.19662	2	5	0.000424	9606	Homo sapiens	FYN;PAK2		R-HSA-164943;R-HSA-200908
R-HSA-381676	Glucagon-like Peptide-1 (GLP1) regulates insulin secretion	5	49	0.00350425	0.057951	0.19662	8	11	0.000933	9606	Homo sapiens	GNAS;GNB4;PRKACA		R-HSA-381607;R-HSA-381713;R-HSA-422320;R-HSA-381612;R-HSA-381644;R-HSA-381704;R-HSA-381707;R-HSA-381706
R-HSA-2408557	Selenocysteine synthesis	9	116	0.00829579	0.0596293	0.19662	3	7	0.000594	9606	Homo sapiens	RPS25;RPS18;RPS3;SARS;RPL38;RPS20;RPSA;RPS21;RPS12		R-HSA-2408529;R-HSA-2408526;R-HSA-5333615
R-HSA-3700989	Transcriptional Regulation by TP53	28	486	0.0347565	0.0610576	0.19662	34	259	0.0219715	9606	Homo sapiens	GPI;CCNT1;CHD3;TXN;PRDX2;PPP2R1A;PRDX1;TNKS1BP1;NELFCD;PRMT5;SUPT16H;SURF1;BRPF1;TXNRD1;RPA1;SSRP1;GTF2F1;SUPT5H;MTOR;DDB2;CDK9;CDK2;AGO2;DRG1;CDK1;TCEA1		R-HSA-6792871;R-HSA-6797606;R-HSA-6799332;R-HSA-2318752;R-HSA-6803875;R-HSA-70475;R-HSA-5631903;R-HSA-163214;R-HSA-6805109;R-HSA-6805620;R-HSA-2321904;R-HSA-6797616;R-HSA-5631885;R-HSA-6793661;R-HSA-5633295;R-HSA-187934;R-HSA-6805638;R-HSA-6805061;R-HSA-6805059;R-HSA-3341343;R-HSA-73646;R-HSA-6805640;R-HSA-6806423;R-HSA-6805650;R-HSA-380979;R-HSA-6806417;R-HSA-6797712;R-HSA-5633314;R-HSA-6792863;…
R-HSA-6807070	PTEN Regulation	12	171	0.0122291	0.061266	0.19662	27	56	0.00475059	9606	Homo sapiens	PSMD8;PSMA6;PSMD11;PSMA4;PSMB5;PSMA2;PSMD5;AGO2;PSMB1;CHD3;PSMA7;MTOR		R-HSA-8944457;R-HSA-8944522;R-HSA-2318752;R-HSA-8948621;R-HSA-8948623;R-HSA-8948612;R-HSA-8944454;R-HSA-8948569;R-HSA-8944538;R-HSA-8944599;R-HSA-8944104;R-HSA-8948651;R-HSA-8944684;R-HSA-8948524;R-HSA-8945709;R-HSA-8948641;R-HSA-8944483;R-HSA-8943780;R-HSA-8948582;R-HSA-8948583;R-HSA-8944632;R-HSA-8948536;R-HSA-8944569;R-HSA-8948602;R-HSA-8850992;R-HSA-8944497;R-HSA-8948594
R-HSA-5656169	Termination of translesion DNA synthesis	4	35	0.00250304	0.0619179	0.19662	8	9	0.000763	9606	Homo sapiens	USP10;POLD1;POLE3;RPA1		R-HSA-5653766;R-HSA-5653780;R-HSA-5653840;R-HSA-5653838;R-HSA-5653756;R-HSA-5653786;R-HSA-5653770;R-HSA-5653754
R-HSA-168273	Influenza Viral RNA Transcription and Replication	12	173	0.0123722	0.0655398	0.19662	6	15	0.00127248	9606	Homo sapiens	RPS25;HSP90AA1;RPS18;TPR;RPS3;RPL38;RPS20;RPSA;GTF2F1;RPS21;IPO5;RPS12		R-HSA-192627;R-HSA-192704;R-HSA-168326;R-HSA-192841;R-HSA-192830;R-HSA-192925
R-HSA-5358606	Mismatch repair (MMR) directed by MSH2:MSH3 (MutSbeta)	3	22	0.00157334	0.0669132	0.20074	8	9	0.000763	9606	Homo sapiens	MSH3;POLD1;RPA1		R-HSA-5358545;R-HSA-5358513;R-HSA-5358512;R-HSA-5358579;R-HSA-5358519;R-HSA-5358919;R-HSA-5358619;R-HSA-5444511
R-HSA-5358565	Mismatch repair (MMR) directed by MSH2:MSH6 (MutSalpha)	3	22	0.00157334	0.0669132	0.20074	8	10	0.000848	9606	Homo sapiens	MSH6;POLD1;RPA1		R-HSA-5358912;R-HSA-5358579;R-HSA-5358597;R-HSA-5358599;R-HSA-5358518;R-HSA-5444516;R-HSA-5358525;R-HSA-5358510
R-HSA-113510	E2F mediated regulation of DNA replication	3	22	0.00157334	0.0669132	0.20074	3	4	0.000339	9606	Homo sapiens	PRIM2;PPP2R1A;CDK1		R-HSA-113504;R-HSA-113638;R-HSA-113503
R-HSA-110357	Displacement of DNA glycosylase by APEX1	2	10	0.000715	0.0670772	0.201232	8	8	0.000679	9606	Homo sapiens	NTHL1;APEX1		R-HSA-110353;R-HSA-110352;R-HSA-110355;R-HSA-110354;R-HSA-110356;R-HSA-110349;R-HSA-110351;R-HSA-110350
R-HSA-163754	Insulin effects increased synthesis of Xylulose-5-Phosphate	2	10	0.000715	0.0670772	0.201232	3	3	0.000254	9606	Homo sapiens	TALDO1;TKT		R-HSA-163751;R-HSA-163764;R-HSA-163741
R-HSA-114516	Disinhibition of SNARE formation	2	10	0.000715	0.0670772	0.201232	2	2	0.00017	9606	Homo sapiens	PRPF38B;PRKACA		R-HSA-114683;R-HSA-114684
R-HSA-428890	Role of ABL in ROBO-SLIT signaling	2	10	0.000715	0.0670772	0.201232	1	4	0.000339	9606	Homo sapiens	CLASP1;CLASP2		R-HSA-428885
R-HSA-68962	Activation of the pre-replicative complex	4	36	0.00257456	0.0671474	0.201442	5	9	0.000763	9606	Homo sapiens	PRIM2;CDK2;POLE3;RPA1		R-HSA-68960;R-HSA-68914;R-HSA-68917;R-HSA-68916;R-HSA-68918
R-HSA-5626467	RHO GTPases activate IQGAPs	4	36	0.00257456	0.0671474	0.201442	1	5	0.000424	9606	Homo sapiens	TUBB4B;TUBA4A		R-HSA-5672329
R-HSA-2173789	TGF-beta receptor signaling activates SMADs	4	36	0.00257456	0.0671474	0.201442	7	39	0.00330845	9606	Homo sapiens	XPO1;STRAP;NEDD8;UCHL5		R-HSA-2128994;R-HSA-178215;R-HSA-2167924;R-HSA-2179291;R-HSA-2127562;R-HSA-2179293;R-HSA-4332236
R-HSA-8852135	Protein ubiquitination	7	84	0.0060073	0.0672199	0.20166	24	32	0.00271463	9606	Homo sapiens	USP5;UBE2N;UBA1;CDC73;RAD18;RNF40		R-HSA-8852134;R-HSA-8852133;R-HSA-8852132;R-HSA-8852131;R-HSA-8938829;R-HSA-8852130;R-HSA-8865090;R-HSA-8852129;R-HSA-8852128;R-HSA-8943040;R-HSA-8943041;R-HSA-8853515;R-HSA-8865098;R-HSA-8939335;R-HSA-8852136;R-HSA-8943003;R-HSA-8939323;R-HSA-8938815;R-HSA-8943007;R-HSA-8852127;R-HSA-8942099;R-HSA-8942101;R-HSA-8865050;R-HSA-8853529
R-HSA-983231	Factors involved in megakaryocyte development and platelet production	13	194	0.013874	0.070306	0.210918	9	43	0.00364778	9606	Homo sapiens	CBX5;KIF2A;KIF5B;CDK2;KIF11;TUBB4B;KLC1;PRKACA;TUBA4A		R-HSA-984606;R-HSA-984733;R-HSA-983259;R-HSA-994106;R-HSA-983194;R-HSA-990489;R-HSA-1013881;R-HSA-992708;R-HSA-983266
R-HSA-6781827	Transcription-Coupled Nucleotide Excision Repair (TC-NER)	7	85	0.00607881	0.0705714	0.211714	13	16	0.00135731	9606	Homo sapiens	COPS4;CUL4A;COPS2;POLD1;POLE3;RPA1;TCEA1		R-HSA-6782211;R-HSA-6782208;R-HSA-6781867;R-HSA-6781833;R-HSA-6782069;R-HSA-6782004;R-HSA-6782227;R-HSA-6782131;R-HSA-6782224;R-HSA-6782141;R-HSA-6782204;R-HSA-6782138;R-HSA-6782234
R-HSA-8955332	Carboxyterminal post-translational modifications of tubulin	5	52	0.0037188	0.0706994	0.212098	6	6	0.000509	9606	Homo sapiens	TTLL12;TUBB4B;TUBA4A		R-HSA-8955706;R-HSA-8955869;R-HSA-8955712;R-HSA-8865774;R-HSA-8867370;R-HSA-8866105
R-HSA-432040	Vasopressin regulates renal water homeostasis via Aquaporins	5	52	0.0037188	0.0706994	0.212098	8	15	0.00127248	9606	Homo sapiens	GNAS;GNB4;PRKACA		R-HSA-163617;R-HSA-111925;R-HSA-432195;R-HSA-422320;R-HSA-8951727;R-HSA-432188;R-HSA-164377;R-HSA-432232
R-HSA-190828	Gap junction trafficking	5	52	0.0037188	0.0706994	0.212098	6	20	0.00169664	9606	Homo sapiens	TUBB4B;TUBA4A;DNM2		R-HSA-196017;R-HSA-190519;R-HSA-190520;R-HSA-191737;R-HSA-190829;R-HSA-190877
R-HSA-3928664	Ephrin signaling	3	23	0.00164485	0.0742124	0.222637	11	11	0.000933	9606	Homo sapiens	FYN;PAK2;EPHB4		R-HSA-3928633;R-HSA-3928639;R-HSA-3928594;R-HSA-3928625;R-HSA-3928641;R-HSA-3928640;R-HSA-3928631;R-HSA-3928615;R-HSA-3928614;R-HSA-3928580;R-HSA-4093329
R-HSA-392851	Prostacyclin signalling through prostacyclin receptor	3	23	0.00164485	0.0742124	0.222637	3	4	0.000339	9606	Homo sapiens	GNAS;GNB4		R-HSA-392852;R-HSA-392870;R-HSA-392874
R-HSA-2564830	Cytosolic iron-sulfur cluster assembly	3	23	0.00164485	0.0742124	0.222637	1	3	0.000254	9606	Homo sapiens	POLD1;FAM96B;MMS19		R-HSA-2564828
R-HSA-373755	Semaphorin interactions	6	70	0.00500608	0.0778357	0.233507	18	40	0.00339328	9606	Homo sapiens	HSP90AA1;CFL1;FYN;TLN1;PAK2		R-HSA-399942;R-HSA-399941;R-HSA-399939;R-HSA-399936;R-HSA-399950;R-HSA-399951;R-HSA-399946;R-HSA-399947;R-HSA-399944;R-HSA-399952;R-HSA-399934;R-HSA-399935;R-HSA-419644;R-HSA-399933;R-HSA-419645;R-HSA-399930;R-HSA-399931;R-HSA-399928
R-HSA-69190	DNA strand elongation	4	38	0.00271759	0.0782672	0.234802	10	15	0.00127248	9606	Homo sapiens	PRIM2;FEN1;POLD1;RPA1		R-HSA-69152;R-HSA-69074;R-HSA-69140;R-HSA-69127;R-HSA-69063;R-HSA-69142;R-HSA-69144;R-HSA-69053;R-HSA-69116;R-HSA-69068
R-HSA-381042	PERK regulates gene expression	4	38	0.00271759	0.0782672	0.234802	4	11	0.000933	9606	Homo sapiens	KHSRP;ASNS;EIF2S1;EIF2A		R-HSA-381111;R-HSA-517731;R-HSA-1791118;R-HSA-381128
R-HSA-8866904	Negative regulation of activity of TFAP2 (AP-2) family transcription factors	2	11	0.000787	0.0790092	0.237028	3	6	0.000509	9606	Homo sapiens	TFAP2A		R-HSA-8864343;R-HSA-3234081;R-HSA-8864361
R-HSA-8877627	Vitamin E	1	2	0.000143	0.0806682	0.242004	2	2	0.00017	9606	Homo sapiens	TPP1		R-HSA-8874705;R-HSA-8874718
R-HSA-211728	Regulation of PAK-2p34 activity by PS-GAP/RHG10	1	2	0.000143	0.0806682	0.242004	2	2	0.00017	9606	Homo sapiens	PAK2		R-HSA-211731;R-HSA-211716
R-HSA-5632927	Defective Mismatch Repair Associated With MSH3	1	2	0.000143	0.0806682	0.242004	1	1	8.48e-05	9606	Homo sapiens	MSH3		R-HSA-5578663
R-HSA-5632968	Defective Mismatch Repair Associated With MSH6	1	2	0.000143	0.0806682	0.242004	1	1	8.48e-05	9606	Homo sapiens	MSH6		R-HSA-5632970
R-HSA-5609974	Defective PGM1 causes PGM1-CDG (CDG1t)	1	2	0.000143	0.0806682	0.242004	1	1	8.48e-05	9606	Homo sapiens	PGM1		R-HSA-5609939
R-HSA-2173793	Transcriptional activity of SMAD2/SMAD3:SMAD4 heterotrimer	5	55	0.00393335	0.0848625	0.254588	6	38	0.00322362	9606	Homo sapiens	NCOR2;CDK9;NCOR1;CCNT1;PARP1		R-HSA-2187330;R-HSA-2186741;R-HSA-2176475;R-HSA-2186747;R-HSA-173481;R-HSA-2187325
R-HSA-8878166	Transcriptional regulation by RUNX2	10	144	0.0102982	0.0867088	0.260126	5	84	0.00712589	9606	Homo sapiens	PSMD8;PSMA6;PSMD11;PSMA4;PSMB5;PSMA2;PSMD5;PSMB1;CDK1;PSMA7		R-HSA-8939801;R-HSA-9008475;R-HSA-9008110;R-HSA-9009362;R-HSA-9009282
R-HSA-5684996	MAPK1/MAPK3 signaling	17	280	0.0200243	0.0873536	0.262061	22	46	0.00390227	9606	Homo sapiens	MAP2K2;PSMD11;PEBP1;RASAL2;PSMA7;PSMD8;PSMA6;PSMA4;PSMB5;PSMA2;PSMD5;PPP2R1A;PSMB1;CDK1;FYN;TLN1;VCL		R-HSA-5658231;R-HSA-5672980;R-HSA-5674132;R-HSA-109858;R-HSA-5672978;R-HSA-5674130;R-HSA-109862;R-HSA-5658430;R-HSA-5674366;R-HSA-109864;R-HSA-5672957;R-HSA-5675417;R-HSA-5675431;R-HSA-5672965;R-HSA-5674373;R-HSA-5658435;R-HSA-5674496;R-HSA-5672961;R-HSA-112342;R-HSA-5672972;R-HSA-5672973;R-HSA-5672969
R-HSA-157858	Gap junction trafficking and regulation	5	56	0.00400486	0.0898915	0.269675	6	24	0.00203597	9606	Homo sapiens	TUBB4B;TUBA4A;DNM2		R-HSA-196017;R-HSA-190519;R-HSA-190520;R-HSA-191737;R-HSA-190829;R-HSA-190877
R-HSA-204626	Hypusine synthesis from eIF5A-lysine	2	12	0.000858	0.0915413	0.274624	3	3	0.000254	9606	Homo sapiens	EIF5A		R-HSA-204647;R-HSA-204662;R-HSA-204617
R-HSA-2993913	Clearance of Nuclear Envelope Membranes from Chromatin	2	12	0.000858	0.0915413	0.274624	1	1	8.48e-05	9606	Homo sapiens	LMNA		R-HSA-2993898
R-HSA-2465910	MASTL Facilitates Mitotic Progression	2	12	0.000858	0.0915413	0.274624	2	4	0.000339	9606	Homo sapiens	PPP2R1A;CDK1		R-HSA-2430533;R-HSA-2430552
R-HSA-8851680	Butyrophilin (BTN) family interactions	2	12	0.000858	0.0915413	0.274624	1	8	0.000679	9606	Homo sapiens	BTF3		R-HSA-8851038
R-HSA-190861	Gap junction assembly	4	41	0.00293213	0.096541	0.289623	3	16	0.00135731	9606	Homo sapiens	TUBB4B;TUBA4A		R-HSA-190520;R-HSA-191737;R-HSA-190877
R-HSA-373760	L1CAM interactions	9	130	0.009297	0.101844	0.292698	10	54	0.00458093	9606	Homo sapiens	CNTNAP1;MAP2K2;MSN;LAMC1;TUBB4B;TUBA4A;DNM2		R-HSA-374677;R-HSA-373733;R-HSA-555065;R-HSA-445077;R-HSA-443778;R-HSA-443779;R-HSA-445089;R-HSA-109862;R-HSA-445071;R-HSA-374680
R-HSA-140342	Apoptosis induced DNA fragmentation	2	13	0.00093	0.104604	0.292698	11	12	0.00101798	9606	Homo sapiens	CAD;HMGB1		R-HSA-211186;R-HSA-211239;R-HSA-211207;R-HSA-211191;R-HSA-211190;R-HSA-211206;R-HSA-266204;R-HSA-211193;R-HSA-9029667;R-HSA-211224;R-HSA-211247
R-HSA-211227	Activation of DNA fragmentation factor	2	13	0.00093	0.104604	0.292698	11	12	0.00101798	9606	Homo sapiens	CAD;HMGB1		R-HSA-211186;R-HSA-211239;R-HSA-211207;R-HSA-211191;R-HSA-211190;R-HSA-211206;R-HSA-266204;R-HSA-211193;R-HSA-9029667;R-HSA-211224;R-HSA-211247
R-HSA-113501	Inhibition of replication initiation of damaged DNA by RB1/E2F1	2	13	0.00093	0.104604	0.292698	2	3	0.000254	9606	Homo sapiens	PRIM2;PPP2R1A		R-HSA-113504;R-HSA-113503
R-HSA-442720	CREB phosphorylation through the activation of Adenylate Cyclase	2	13	0.00093	0.104604	0.292698	1	2	0.00017	9606	Homo sapiens	PRKACA		R-HSA-111919
R-HSA-73894	DNA Repair	20	349	0.0249589	0.104712	0.292698	155	309	0.0262131	9606	Homo sapiens	FEN1;PARP1;USP10;RPA1;DDB2;MSH6;COPS4;CUL4A;ALKBH5;NTHL1;MSH3;APEX1;COPS2;POLD1;CDK2;POLE3;UBE2N;TCEA1;ASCC3;RAD18		R-HSA-5655892;R-HSA-5656148;R-HSA-69891;R-HSA-5684052;R-HSA-5653840;R-HSA-5656158;R-HSA-5651805;R-HSA-110349;R-HSA-5687640;R-HSA-110351;R-HSA-5683801;R-HSA-110350;R-HSA-5651782;R-HSA-110353;R-HSA-5358912;R-HSA-110352;R-HSA-6782069;R-HSA-110355;R-HSA-110354;R-HSA-110356;R-HSA-5358919;R-HSA-110359;R-HSA-5653838;R-HSA-110360;R-HSA-110363;R-HSA-110364;R-HSA-110368;R-HSA-110371;R-HSA-5690996;R-HSA-568…
R-HSA-5696397	Gap-filling DNA repair synthesis and ligation in GG-NER	3	27	0.00193092	0.106637	0.292698	2	2	0.00017	9606	Homo sapiens	POLD1;POLE3;RPA1		R-HSA-5690997;R-HSA-5691001
R-HSA-167242	Abortive elongation of HIV-1 transcript in the absence of Tat	3	27	0.00193092	0.106637	0.292698	2	2	0.00017	9606	Homo sapiens	NELFCD;GTF2F1;SUPT5H		R-HSA-167147;R-HSA-167087
R-HSA-166208	mTORC1-mediated signalling	3	27	0.00193092	0.106637	0.292698	4	7	0.000594	9606	Homo sapiens	MTOR;EIF4B;EIF4G1		R-HSA-165777;R-HSA-165766;R-HSA-165718;R-HSA-165692
R-HSA-2173795	Downregulation of SMAD2/3:SMAD4 transcriptional activity	3	27	0.00193092	0.106637	0.292698	5	21	0.00178147	9606	Homo sapiens	NCOR2;NCOR1;PARP1		R-HSA-2187330;R-HSA-2186741;R-HSA-2186747;R-HSA-173481;R-HSA-2187325
R-HSA-5663202	Diseases of signal transduction	26	475	0.0339698	0.107194	0.292698	89	297	0.0251951	9606	Homo sapiens	PSMD11;CTBP2;PEBP1;RASAL2;PSMA7;PSMD8;PSMB5;PSMD5;PPP2R1A;LMNA;PSMB1;TRIM24;FYN;HSP90AA1;MAP2K2;GTF2F1;QKI;MTOR;NCOR2;PSMA6;NCOR1;PSMA4;TBL1XR1;PSMA2;TLN1;VCL		R-HSA-6802919;R-HSA-6802918;R-HSA-1218833;R-HSA-6802916;R-HSA-6802914;R-HSA-6802912;R-HSA-6802927;R-HSA-6802926;R-HSA-6802925;R-HSA-4839746;R-HSA-6802924;R-HSA-1226014;R-HSA-6802922;R-HSA-6802921;R-HSA-1226012;R-HSA-5339713;R-HSA-6802935;R-HSA-1220610;R-HSA-6802934;R-HSA-1220611;R-HSA-1248002;R-HSA-6802933;R-HSA-6802932;R-HSA-1220614;R-HSA-1839112;R-HSA-1220612;R-HSA-2220982;R-HSA-1220613;R-HSA-6…
R-HSA-71387	Metabolism of carbohydrates	23	413	0.0295359	0.108682	0.292698	35	213	0.0180692	9606	Homo sapiens	GPI;PRPS1;TPI1;GOT1;PGAM1;SORD;TALDO1;ENO1;PGD;PC;PKM;PPP2R1A;TPR;PGK1;ALDOA;TKT;PRKACA;GAPDH;PGM1		R-HSA-70272;R-HSA-70592;R-HSA-71299;R-HSA-8982667;R-HSA-71495;R-HSA-70471;R-HSA-71496;R-HSA-70475;R-HSA-70481;R-HSA-5662471;R-HSA-70482;R-HSA-71445;R-HSA-70486;R-HSA-70427;R-HSA-71324;R-HSA-70494;R-HSA-163741;R-HSA-163750;R-HSA-70501;R-HSA-163751;R-HSA-6787329;R-HSA-71335;R-HSA-71654;R-HSA-71334;R-HSA-71850;R-HSA-73580;R-HSA-71660;R-HSA-170796;R-HSA-111215;R-HSA-70449;R-HSA-5652195;R-HSA-163764;R…
R-HSA-204005	COPII-mediated vesicle transport	6	77	0.00550669	0.109211	0.292698	11	16	0.00135731	9606	Homo sapiens	SEC13;SEC23A;TFG;SEC16A;PPP6R3;SEC24C		R-HSA-5694439;R-HSA-5694421;R-HSA-5694418;R-HSA-203973;R-HSA-5694417;R-HSA-5694446;R-HSA-5694527;R-HSA-204008;R-HSA-5694522;R-HSA-5694441;R-HSA-5694409
R-HSA-983705	Signaling by the B Cell Receptor (BCR)	12	190	0.0135879	0.1097	0.292698	4	43	0.00364778	9606	Homo sapiens	PSMD8;PSMA6;PSMD11;AHCYL1;PSMA4;PSMB5;PSMA2;PSMD5;PSMB1;FYN;PPIA;PSMA7		R-HSA-1168640;R-HSA-169683;R-HSA-983709;R-HSA-2025882
R-HSA-6804757	Regulation of TP53 Degradation	4	43	0.00307516	0.109732	0.292698	4	30	0.00254496	9606	Homo sapiens	PPP2R1A;CDK2;CDK1;MTOR		R-HSA-6792871;R-HSA-6792863;R-HSA-6793661;R-HSA-6795290
R-HSA-69205	G1/S-Specific Transcription	4	43	0.00307516	0.109732	0.292698	3	28	0.0023753	9606	Homo sapiens	CDK1;TYMS		R-HSA-8961934;R-HSA-8961920;R-HSA-8962050
R-HSA-539107	Activation of E2F1 target genes at G1/S	4	43	0.00307516	0.109732	0.292698	3	28	0.0023753	9606	Homo sapiens	CDK1;TYMS		R-HSA-8961934;R-HSA-8961920;R-HSA-8962050
R-HSA-8853659	RET signaling	4	43	0.00307516	0.109732	0.292698	2	24	0.00203597	9606	Homo sapiens	PRKACA;PDLIM7		R-HSA-8854908;R-HSA-8855915
R-HSA-192823	Viral mRNA Translation	8	114	0.00815276	0.111878	0.292698	2	2	0.00017	9606	Homo sapiens	RPS25;RPS18;RPS3;RPL38;RPS20;RPSA;RPS21;RPS12		R-HSA-192704;R-HSA-192841
R-HSA-157579	Telomere Maintenance	6	78	0.0055782	0.114154	0.292698	14	23	0.00195114	9606	Homo sapiens	PRIM2;FEN1;POLD1;POLE3;RPA1;TPP1		R-HSA-174438;R-HSA-181450;R-HSA-174441;R-HSA-174446;R-HSA-174444;R-HSA-174445;R-HSA-174451;R-HSA-174448;R-HSA-174452;R-HSA-174427;R-HSA-174456;R-HSA-174425;R-HSA-176702;R-HSA-176700
R-HSA-6803529	FGFR2 alternative splicing	3	28	0.00200243	0.115479	0.292698	4	4	0.000339	9606	Homo sapiens	TIA1;GTF2F1		R-HSA-6803527;R-HSA-6803523;R-HSA-6803838;R-HSA-6803836
R-HSA-2173788	Downregulation of TGF-beta receptor signaling	3	28	0.00200243	0.115479	0.292698	6	28	0.0023753	9606	Homo sapiens	XPO1;STRAP;UCHL5		R-HSA-2128994;R-HSA-178215;R-HSA-2167924;R-HSA-2179291;R-HSA-2127562;R-HSA-2179293
R-HSA-6802949	Signaling by RAS mutants	5	61	0.00436244	0.117254	0.292698	6	8	0.000679	9606	Homo sapiens	MAP2K2;PEBP1;RASAL2;TLN1;VCL		R-HSA-6802834;R-HSA-6803233;R-HSA-6802926;R-HSA-6802925;R-HSA-6802924;R-HSA-6802922
R-HSA-3000171	Non-integrin membrane-ECM interactions	5	61	0.00436244	0.117254	0.292698	6	22	0.0018663	9606	Homo sapiens	LAMA5;DAG1;LAMC1;TKT;PRKACA		R-HSA-2328129;R-HSA-2750187;R-HSA-2426263;R-HSA-2396113;R-HSA-2426355;R-HSA-2465890
R-HSA-192905	vRNP Assembly	2	14	0.00100122	0.118132	0.292698	1	2	0.00017	9606	Homo sapiens	HSP90AA1;IPO5		R-HSA-192830
R-HSA-5673001	RAF/MAP kinase cascade	16	273	0.0195237	0.118268	0.292698	18	39	0.00330845	9606	Homo sapiens	MAP2K2;PSMD11;PEBP1;RASAL2;PSMA7;PSMD8;PSMA6;PSMA4;PSMB5;PSMA2;PSMD5;PPP2R1A;PSMB1;FYN;TLN1;VCL		R-HSA-5658231;R-HSA-5672980;R-HSA-5674132;R-HSA-5672978;R-HSA-5674130;R-HSA-5658430;R-HSA-5674366;R-HSA-5672957;R-HSA-5675417;R-HSA-5675431;R-HSA-5672965;R-HSA-5674373;R-HSA-5658435;R-HSA-5674496;R-HSA-5672961;R-HSA-5672972;R-HSA-5672973;R-HSA-5672969
R-HSA-73930	Abasic sugar-phosphate removal via the single-nucleotide replacement pathway	1	3	0.000215	0.118532	0.292698	2	2	0.00017	9606	Homo sapiens	APEX1		R-HSA-110375;R-HSA-110360
R-HSA-5083629	Defective POMT2 causes MDDGA2, MDDGB2 and MDDGC2	1	3	0.000215	0.118532	0.292698	1	1	8.48e-05	9606	Homo sapiens	DAG1		R-HSA-5615556
R-HSA-5578997	Defective AHCY causes Hypermethioninemia with S-adenosylhomocysteine hydrolase deficiency (HMAHCHD)	1	3	0.000215	0.118532	0.292698	1	1	8.48e-05	9606	Homo sapiens	AHCY		R-HSA-5579084
R-HSA-5619107	Defective TPR may confer susceptibility towards thyroid papillary carcinoma (TPC)	1	3	0.000215	0.118532	0.292698	1	1	8.48e-05	9606	Homo sapiens	TPR		R-HSA-5661474
R-HSA-6791055	TALDO1 deficiency: failed conversion of SH7P, GA3P to Fru(6)P, E4P	1	3	0.000215	0.118532	0.292698	1	1	8.48e-05	9606	Homo sapiens	TALDO1		R-HSA-5659989
R-HSA-5339700	TCF7L2 mutants don't bind CTBP	1	3	0.000215	0.118532	0.292698	1	1	8.48e-05	9606	Homo sapiens	CTBP2		R-HSA-5334052
R-HSA-5083633	Defective POMT1 causes MDDGA1, MDDGB1 and MDDGC1	1	3	0.000215	0.118532	0.292698	1	1	8.48e-05	9606	Homo sapiens	DAG1		R-HSA-5615604
R-HSA-5083628	Defective POMGNT1 causes MDDGA3, MDDGB3 and MDDGC3	1	3	0.000215	0.118532	0.292698	1	1	8.48e-05	9606	Homo sapiens	DAG1		R-HSA-5617096
R-HSA-6791462	TALDO1 deficiency: failed conversion of Fru(6)P, E4P to SH7P, GA3P	1	3	0.000215	0.118532	0.292698	1	1	8.48e-05	9606	Homo sapiens	TALDO1		R-HSA-5659998
R-HSA-352238	Breakdown of the nuclear lamina	1	3	0.000215	0.118532	0.292698	1	3	0.000254	9606	Homo sapiens	LMNA		R-HSA-264865
R-HSA-2454202	Fc epsilon receptor (FCERI) signaling	14	234	0.0167346	0.122296	0.292698	8	63	0.00534442	9606	Homo sapiens	AHCYL1;PSMD11;PSMA7;PSMD8;PSMA6;PSMA4;PSMB5;PSMA2;PSMD5;PSMB1;UBE2N;FYN;UBE2V1;PAK2		R-HSA-2730889;R-HSA-2730904;R-HSA-169683;R-HSA-2730856;R-HSA-202534;R-HSA-2730860;R-HSA-5607724;R-HSA-2730887
R-HSA-1489509	DAG and IP3 signaling	4	45	0.00321819	0.12368	0.292698	7	19	0.00161181	9606	Homo sapiens	AHCYL1;PRKACA		R-HSA-169683;R-HSA-111970;R-HSA-111925;R-HSA-111924;R-HSA-8951727;R-HSA-111919;R-HSA-111966
R-HSA-2871837	FCERI mediated NF-kB activation	11	175	0.0125152	0.12458	0.292698	3	19	0.00161181	9606	Homo sapiens	PSMD8;PSMA6;PSMD11;PSMA4;PSMB5;PSMA2;PSMD5;PSMB1;UBE2N;UBE2V1;PSMA7		R-HSA-2730904;R-HSA-202534;R-HSA-5607724
R-HSA-2980766	Nuclear Envelope Breakdown	5	63	0.00450547	0.129185	0.292698	8	13	0.00110282	9606	Homo sapiens	TPR;LMNA;CDK1;PRKACA		R-HSA-2984220;R-HSA-5229194;R-HSA-5195402;R-HSA-2993898;R-HSA-5223304;R-HSA-5244669;R-HSA-2990880;R-HSA-2990882
R-HSA-3214815	HDACs deacetylate histones	5	63	0.00450547	0.129185	0.292698	2	4	0.000339	9606	Homo sapiens	NCOR2;NCOR1;TBL1XR1;ARID4B;CHD3		R-HSA-3777129;R-HSA-3769447
R-HSA-6802948	Signaling by high-kinase activity BRAF mutants	4	46	0.00328971	0.130922	0.292698	4	6	0.000509	9606	Homo sapiens	MAP2K2;PEBP1;TLN1;VCL		R-HSA-6802912;R-HSA-6802911;R-HSA-6802910;R-HSA-6803227
R-HSA-6806003	Regulation of TP53 Expression and Degradation	4	46	0.00328971	0.130922	0.292698	4	35	0.00296912	9606	Homo sapiens	PPP2R1A;CDK2;CDK1;MTOR		R-HSA-6792871;R-HSA-6792863;R-HSA-6793661;R-HSA-6795290
R-HSA-5685939	HDR through MMEJ (alt-NHEJ)	2	15	0.00107273	0.132066	0.292698	4	8	0.000679	9606	Homo sapiens	FEN1;PARP1		R-HSA-5687653;R-HSA-5687664;R-HSA-5687484;R-HSA-5687640
R-HSA-5674135	MAP2K and MAPK activation	4	47	0.00336122	0.138336	0.292698	8	8	0.000679	9606	Homo sapiens	MAP2K2;PEBP1;TLN1;VCL		R-HSA-5672980;R-HSA-5674132;R-HSA-5674373;R-HSA-5672978;R-HSA-5674130;R-HSA-5674366;R-HSA-5672972;R-HSA-5672973
R-HSA-1799339	SRP-dependent cotranslational protein targeting to membrane	8	121	0.00865336	0.141843	0.292698	5	5	0.000424	9606	Homo sapiens	RPS25;RPS18;RPS3;RPL38;RPS20;RPSA;RPS21;RPS12		R-HSA-1799326;R-HSA-1799330;R-HSA-1799329;R-HSA-1799335;R-HSA-1799332
R-HSA-110313	Translesion synthesis by Y family DNA polymerases bypasses lesions on DNA template	4	48	0.00343274	0.145913	0.292698	24	28	0.0023753	9606	Homo sapiens	USP10;POLD1;POLE3;RPA1		R-HSA-5652151;R-HSA-5655892;R-HSA-110307;R-HSA-5656148;R-HSA-5653780;R-HSA-110308;R-HSA-110311;R-HSA-5653840;R-HSA-5656158;R-HSA-5653756;R-HSA-5655965;R-HSA-110317;R-HSA-5653786;R-HSA-5653754;R-HSA-5655835;R-HSA-110316;R-HSA-110319;R-HSA-5653766;R-HSA-5653838;R-HSA-5654989;R-HSA-5654986;R-HSA-5653770;R-HSA-5656105;R-HSA-5654985
R-HSA-6802946	Signaling by moderate kinase activity BRAF mutants	4	48	0.00343274	0.145913	0.292698	5	7	0.000594	9606	Homo sapiens	MAP2K2;PEBP1;TLN1;VCL		R-HSA-6802919;R-HSA-6802916;R-HSA-6802914;R-HSA-6803230;R-HSA-6802921
R-HSA-69091	Polymerase switching	2	16	0.00114425	0.146349	0.292698	4	4	0.000339	9606	Homo sapiens	PRIM2;POLD1		R-HSA-69074;R-HSA-69063;R-HSA-69053;R-HSA-69068
R-HSA-69109	Leading Strand Synthesis	2	16	0.00114425	0.146349	0.292698	4	4	0.000339	9606	Homo sapiens	PRIM2;POLD1		R-HSA-69074;R-HSA-69063;R-HSA-69053;R-HSA-69068
R-HSA-68952	DNA replication initiation	2	16	0.00114425	0.146349	0.292698	2	2	0.00017	9606	Homo sapiens	PRIM2;POLE3		R-HSA-68913;R-HSA-68950
R-HSA-68884	Mitotic Telophase/Cytokinesis	2	16	0.00114425	0.146349	0.292698	3	5	0.000424	9606	Homo sapiens	NUDC;WAPAL		R-HSA-2470935;R-HSA-156682;R-HSA-2468040
R-HSA-73943	Reversal of alkylation damage by DNA dioxygenases	2	16	0.00114425	0.146349	0.292698	7	13	0.00110282	9606	Homo sapiens	ALKBH5;ASCC3		R-HSA-5657637;R-HSA-5657617;R-HSA-112123;R-HSA-8857692;R-HSA-112125;R-HSA-5657642;R-HSA-112124
R-HSA-975144	IRAK1 recruits IKK complex upon TLR7/8 or 9 stimulation	2	16	0.00114425	0.146349	0.292698	1	4	0.000339	9606	Homo sapiens	UBE2N;UBE2V1		R-HSA-975122
R-HSA-937039	IRAK1 recruits IKK complex	2	16	0.00114425	0.146349	0.292698	1	4	0.000339	9606	Homo sapiens	UBE2N;UBE2V1		R-HSA-937050
R-HSA-70370	Galactose catabolism	2	16	0.00114425	0.146349	0.292698	1	4	0.000339	9606	Homo sapiens	PGM1		R-HSA-70427
R-HSA-6782210	Gap-filling DNA repair synthesis and ligation in TC-NER	5	66	0.00472002	0.148061	0.296123	2	2	0.00017	9606	Homo sapiens	CUL4A;POLD1;POLE3;RPA1;TCEA1		R-HSA-6782227;R-HSA-6782208
R-HSA-422356	Regulation of insulin secretion	7	104	0.0074376	0.152323	0.304646	16	37	0.00313878	9606	Homo sapiens	AHCYL1;GNAS;GNB4;PRKACA		R-HSA-381607;R-HSA-400037;R-HSA-400097;R-HSA-400046;R-HSA-381612;R-HSA-381644;R-HSA-400015;R-HSA-399978;R-HSA-381704;R-HSA-381707;R-HSA-381706;R-HSA-169683;R-HSA-381713;R-HSA-422320;R-HSA-265682;R-HSA-400092
R-HSA-380994	ATF4 activates genes	3	32	0.00228849	0.153345	0.306691	2	7	0.000594	9606	Homo sapiens	KHSRP;ASNS		R-HSA-517731;R-HSA-1791118
R-HSA-6802955	Paradoxical activation of RAF signaling by kinase inactive BRAF	4	49	0.00350425	0.153649	0.307298	5	7	0.000594	9606	Homo sapiens	MAP2K2;PEBP1;TLN1;VCL		R-HSA-6802918;R-HSA-6803234;R-HSA-6802943;R-HSA-6802942;R-HSA-6802941
R-HSA-211736	Stimulation of the cell death response by PAK-2p34	1	4	0.000286	0.154839	0.309678	4	4	0.000339	9606	Homo sapiens	PAK2		R-HSA-211651;R-HSA-211650;R-HSA-211712;R-HSA-211583
R-HSA-5579007	Defective ACY1 causes encephalopathy	1	4	0.000286	0.154839	0.309678	1	1	8.48e-05	9606	Homo sapiens	CPS1		R-HSA-5579081
R-HSA-75108	Activation, myristolyation of BID and translocation to mitochondria	1	4	0.000286	0.154839	0.309678	1	4	0.000339	9606	Homo sapiens	NMT1		R-HSA-141367
R-HSA-4420097	VEGFA-VEGFR2 Pathway	8	125	0.00893943	0.160584	0.321169	35	77	0.00653207	9606	Homo sapiens	HSP90AA1;AHCYL1;FYN;PRKACA;PAK2;MTOR		R-HSA-5218828;R-HSA-5218826;R-HSA-5218824;R-HSA-5218823;R-HSA-5218822;R-HSA-5218821;R-HSA-202127;R-HSA-5218847;R-HSA-169683;R-HSA-202129;R-HSA-5357445;R-HSA-5218839;R-HSA-5218838;R-HSA-202137;R-HSA-5218643;R-HSA-5218832;R-HSA-202144;R-HSA-5218855;R-HSA-5218854;R-HSA-5218851;R-HSA-1497784;R-HSA-5218814;R-HSA-5357472;R-HSA-5218813;R-HSA-5218812;R-HSA-198640;R-HSA-5218811;R-HSA-5357477;R-HSA-5218809…
R-HSA-5628897	TP53 Regulates Metabolic Genes	8	125	0.00893943	0.160584	0.321169	9	34	0.00288429	9606	Homo sapiens	GPI;PRDX2;SURF1;PRDX1;TXNRD1;AGO2;TXN;MTOR		R-HSA-2318752;R-HSA-2321904;R-HSA-380979;R-HSA-5631885;R-HSA-70475;R-HSA-5631903;R-HSA-163214;R-HSA-3341343;R-HSA-73646
R-HSA-389359	CD28 dependent Vav1 pathway	2	17	0.00121576	0.160929	0.321857	6	6	0.000509	9606	Homo sapiens	FYN;PAK2		R-HSA-389348;R-HSA-389350;R-HSA-389788;R-HSA-388814;R-HSA-389352;R-HSA-389354
R-HSA-174430	Telomere C-strand synthesis initiation	2	17	0.00121576	0.160929	0.321857	2	2	0.00017	9606	Homo sapiens	PRIM2;POLE3		R-HSA-174427;R-HSA-174425
R-HSA-174411	Polymerase switching on the C-strand of the telomere	2	17	0.00121576	0.160929	0.321857	2	4	0.000339	9606	Homo sapiens	PRIM2;POLD1		R-HSA-174448;R-HSA-174452
R-HSA-6782135	Dual incision in TC-NER	5	68	0.00486305	0.161258	0.322516	6	6	0.000509	9606	Homo sapiens	CUL4A;POLD1;POLE3;RPA1;TCEA1		R-HSA-6782211;R-HSA-6782131;R-HSA-6782224;R-HSA-6782141;R-HSA-6782204;R-HSA-6782138
R-HSA-445717	Aquaporin-mediated transport	5	68	0.00486305	0.161258	0.322516	8	25	0.0021208	9606	Homo sapiens	GNAS;GNB4;PRKACA		R-HSA-163617;R-HSA-111925;R-HSA-432195;R-HSA-422320;R-HSA-8951727;R-HSA-432188;R-HSA-164377;R-HSA-432232
R-HSA-5688426	Deubiquitination	16	288	0.0205964	0.161465	0.322929	13	77	0.00653207	9606	Homo sapiens	PSMD11;USP5;USP10;NEDD8;UCHL5;PSMA7;DDB2;PSMD8;PSMA6;PSMA4;PSMB5;PSMA2;PSMD5;PSMB1;CDK1;OGT		R-HSA-5689973;R-HSA-5665854;R-HSA-5689630;R-HSA-8940100;R-HSA-5690808;R-HSA-5696997;R-HSA-6781779;R-HSA-5689539;R-HSA-5665871;R-HSA-2179291;R-HSA-6782106;R-HSA-5689544;R-HSA-5690152
R-HSA-195721	Signaling by WNT	18	330	0.0236001	0.16154	0.323081	43	156	0.0132338	9606	Homo sapiens	PSMD11;CTBP2;CDC73;PSMA7;PSMD8;PSMA6;XPO1;PSMA4;PSMB5;PSMA2;PSMD5;PPP2R1A;AGO2;PSMB1;GNB4;PRKACA;PFN1;WLS		R-HSA-3601585;R-HSA-2130279;R-HSA-195275;R-HSA-3769392;R-HSA-2130282;R-HSA-3322424;R-HSA-3781941;R-HSA-2130286;R-HSA-5138432;R-HSA-3781943;R-HSA-5229343;R-HSA-195283;R-HSA-4608855;R-HSA-3247840;R-HSA-195280;R-HSA-3247843;R-HSA-195287;R-HSA-3247844;R-HSA-201685;R-HSA-3769391;R-HSA-3247847;R-HSA-1504193;R-HSA-3247849;R-HSA-3640874;R-HSA-398040;R-HSA-4332390;R-HSA-195300;R-HSA-195304;R-HSA-4641260;R…
R-HSA-8866652	Synthesis of active ubiquitin: roles of E1 and E2 enzymes	3	33	0.00236001	0.16336	0.32672	14	16	0.00135731	9606	Homo sapiens	USP5;UBA1		R-HSA-8852134;R-HSA-8852133;R-HSA-8852132;R-HSA-8852131;R-HSA-8852130;R-HSA-8865090;R-HSA-8852129;R-HSA-8852128;R-HSA-8853515;R-HSA-8865098;R-HSA-8852136;R-HSA-8852127;R-HSA-8865050;R-HSA-8853529
R-HSA-5689880	Ub-specific processing proteases	12	206	0.0147322	0.163974	0.327948	6	40	0.00339328	9606	Homo sapiens	PSMD8;PSMA6;PSMD11;PSMA4;PSMB5;USP5;USP10;PSMA2;PSMD5;PSMB1;PSMA7;DDB2		R-HSA-5689973;R-HSA-5696997;R-HSA-6781779;R-HSA-5689539;R-HSA-6782106;R-HSA-5690152
R-HSA-1643685	Disease	72	1525	0.109061	0.164396	0.328792	229	953	0.0808449	9606	Homo sapiens	FEN1;CCNT1;GTF2B;PEBP1;ANTXR1;IPO5;PSMD8;XPO1;RPS18;PSMD5;PPP2R1A;TRIM24;DAG1;RPL38;NELFCD;PRKACA;PGM1;RPS12;CAST;SUPT16H;HSP90AA1;PDCD6IP;MAP2K2;TALDO1;RPSA;GTF2F1;MSH6;NCOR2;PSMA6;NCOR1;PSMA4;TBL1XR1;MSH3;PSMA2;TLN1;PPIA;VCL;AHCY;PSMD11;CTBP2;SLC1A3;RASAL2;PSMA7;PRDX2;PSMB5;PRDX1;TPR;LMNA;PSMB1;RPS3;FYN;PAK2;RANBP1;TXNRD1;SSRP1;EEF2;SUPT5H;MTOR;QKI;CDK9;RPS25;PC;CPS1;NMT1;TCEA1;RPS20;RPS21;HSPA…		R-HSA-180739;R-HSA-182795;R-HSA-5339713;R-HSA-1220610;R-HSA-1220611;R-HSA-1220614;R-HSA-1839112;R-HSA-1220612;R-HSA-1220613;R-HSA-1169421;R-HSA-9613490;R-HSA-167459;R-HSA-9613498;R-HSA-167468;R-HSA-167474;R-HSA-167478;R-HSA-173111;R-HSA-167477;R-HSA-173115;R-HSA-167481;R-HSA-167484;R-HSA-173642;R-HSA-5577244;R-HSA-182859;R-HSA-184392;R-HSA-164943;R-HSA-8868567;R-HSA-8868573;R-HSA-9035988;R-HSA-18…
R-HSA-1433559	Regulation of KIT signaling	2	18	0.00128728	0.175757	0.343387	4	8	0.000679	9606	Homo sapiens	FYN;PRKACA		R-HSA-1433508;R-HSA-205319;R-HSA-1433506;R-HSA-205244
R-HSA-73942	DNA Damage Reversal	2	18	0.00128728	0.175757	0.343387	7	15	0.00127248	9606	Homo sapiens	ALKBH5;ASCC3		R-HSA-5657637;R-HSA-5657617;R-HSA-112123;R-HSA-8857692;R-HSA-112125;R-HSA-5657642;R-HSA-112124
R-HSA-975110	TRAF6 mediated IRF7 activation in TLR7/8 or 9 signaling	2	18	0.00128728	0.175757	0.343387	1	5	0.000424	9606	Homo sapiens	UBE2N;UBE2V1		R-HSA-975118
R-HSA-8963896	HDL assembly	2	18	0.00128728	0.175757	0.343387	1	9	0.000763	9606	Homo sapiens	PRKACA		R-HSA-5682101
R-HSA-156581	Methylation	4	52	0.0037188	0.177733	0.343387	4	13	0.00110282	9606	Homo sapiens	TRMT112;AHCY;MAT2A;GSTO1		R-HSA-5696230;R-HSA-6800149;R-HSA-174401;R-HSA-5603114
R-HSA-983168	Antigen processing: Ubiquitination & Proteasome degradation	17	315	0.0225274	0.1803	0.343387	8	9	0.000763	9606	Homo sapiens	PSMD11;ANAPC7;UBR4;LMO7;PSMA7;PSMD8;PSMA6;PSMA4;PSMB5;PSMA2;PSMD5;PSMB1;UBE2N;TPP2;UBA1;UBE2V1		R-HSA-983150;R-HSA-983147;R-HSA-983162;R-HSA-983157;R-HSA-983156;R-HSA-983140;R-HSA-983153;R-HSA-983152
R-HSA-180024	DARPP-32 events	3	35	0.00250304	0.18394	0.343387	6	11	0.000933	9606	Homo sapiens	PPP2R1A;PRKACA		R-HSA-111925;R-HSA-177284;R-HSA-8951727;R-HSA-177275;R-HSA-180073;R-HSA-201790
R-HSA-111933	Calmodulin induced events	3	35	0.00250304	0.18394	0.343387	6	14	0.00118765	9606	Homo sapiens	PRKACA		R-HSA-111970;R-HSA-111925;R-HSA-111924;R-HSA-8951727;R-HSA-111919;R-HSA-111966
R-HSA-111997	CaM pathway	3	35	0.00250304	0.18394	0.343387	6	15	0.00127248	9606	Homo sapiens	PRKACA		R-HSA-111970;R-HSA-111925;R-HSA-111924;R-HSA-8951727;R-HSA-111919;R-HSA-111966
R-HSA-420092	Glucagon-type ligand receptors	3	35	0.00250304	0.18394	0.343387	1	8	0.000679	9606	Homo sapiens	GNAS;GNB4		R-HSA-381612
R-HSA-1266738	Developmental Biology	56	1177	0.0841736	0.184958	0.343387	124	484	0.0410587	9606	Homo sapiens	CNTNAP1;TRIO;LAMC1;PSMD8;MED12;RPS18;PSMD5;CFL1;DAG1;RPL38;PRKACA;EPHB4;RPS12;UPF2;HSP90AA1;MAP2K2;RPSA;MED27;TUBA4A;DNM2;ENAH;NCOR2;PSMA6;NCOR1;PSMA4;TBL1XR1;PSMA2;ETF1;TLN1;PFN1;PSMD11;GSPT1;PSMA7;PSMB5;PSMB1;RPS3;FYN;PAK2;PDLIM7;CLASP1;CLASP2;VASP;UPF3B;MSN;TUBB4B;RPS25;RPS20;RPS21;EIF4G1		R-HSA-3928633;R-HSA-3928632;R-HSA-3928639;R-HSA-3928627;R-HSA-1183003;R-HSA-3928625;R-HSA-3928624;R-HSA-3928631;R-HSA-3928628;R-HSA-3928617;R-HSA-3928623;R-HSA-3928610;R-HSA-3928608;R-HSA-3928615;R-HSA-3928614;R-HSA-3928612;R-HSA-3928602;R-HSA-3928601;R-HSA-3928600;R-HSA-418850;R-HSA-3928607;R-HSA-3928604;R-HSA-109862;R-HSA-3928595;R-HSA-3928594;R-HSA-1183032;R-HSA-3928592;R-HSA-418858;R-HSA-3928…
R-HSA-3214858	RMTs methylate histone arginines	4	53	0.00379032	0.18603	0.343387	10	22	0.0018663	9606	Homo sapiens	SMARCD1;PRMT5;SMARCC1;ARID1B		R-HSA-3215426;R-HSA-5216234;R-HSA-5218952;R-HSA-5205799;R-HSA-3215385;R-HSA-3215448;R-HSA-5205861;R-HSA-5661117;R-HSA-3215391;R-HSA-3215406
R-HSA-170145	Phosphorylation of proteins involved in the G2/M transition by Cyclin A:Cdc2 complexes	1	5	0.000358	0.189653	0.343387	2	2	0.00017	9606	Homo sapiens	CDK1		R-HSA-69754;R-HSA-69756
R-HSA-8866906	TFAP2 (AP-2) family regulates transcription of other transcription factors	1	5	0.000358	0.189653	0.343387	2	2	0.00017	9606	Homo sapiens	TFAP2A		R-HSA-8864718;R-HSA-8864729
R-HSA-209563	Axonal growth stimulation	1	5	0.000358	0.189653	0.343387	2	2	0.00017	9606	Homo sapiens	ARHGDIA		R-HSA-193668;R-HSA-193646
R-HSA-1368071	NR1D1 (REV-ERBA) represses gene expression	1	5	0.000358	0.189653	0.343387	1	1	8.48e-05	9606	Homo sapiens	NCOR1		R-HSA-5663252
R-HSA-450513	Tristetraprolin (TTP, ZFP36) binds and destabilizes mRNA	2	19	0.00135879	0.190789	0.343387	4	4	0.000339	9606	Homo sapiens	TNPO1;DCP1A		R-HSA-450400;R-HSA-450431;R-HSA-450463;R-HSA-450394
R-HSA-176412	Phosphorylation of the APC/C	2	19	0.00135879	0.190789	0.343387	2	2	0.00017	9606	Homo sapiens	ANAPC7;CDK1		R-HSA-174119;R-HSA-174132
R-HSA-399955	SEMA3A-Plexin repulsion signaling by inhibiting Integrin adhesion	2	19	0.00135879	0.190789	0.343387	7	8	0.000679	9606	Homo sapiens	FYN;TLN1		R-HSA-399942;R-HSA-399941;R-HSA-399936;R-HSA-399934;R-HSA-399935;R-HSA-399933;R-HSA-399928
R-HSA-418885	DCC mediated attractive signaling	2	19	0.00135879	0.190789	0.343387	8	12	0.00101798	9606	Homo sapiens	TRIO;FYN		R-HSA-373716;R-HSA-418868;R-HSA-418850;R-HSA-418865;R-HSA-374701;R-HSA-418874;R-HSA-418858;R-HSA-418856
R-HSA-168927	TICAM1, RIP1-mediated IKK complex recruitment	2	19	0.00135879	0.190789	0.343387	1	3	0.000254	9606	Homo sapiens	UBE2N;UBE2V1		R-HSA-9014342
R-HSA-2514859	Inactivation, recovery and regulation of the phototransduction cascade	4	54	0.00386183	0.19445	0.343387	3	19	0.00161181	9606	Homo sapiens	NMT1;PRKACA;METAP2		R-HSA-2534087;R-HSA-2534096;R-HSA-74615
R-HSA-4839726	Chromatin organization	14	257	0.0183795	0.199348	0.343387	16	84	0.00712589	9606	Homo sapiens	PRMT5;SMARCD1;SMARCC1;BRPF1;ARID4B;CHD3;ARID1B;NCOR2;MORF4L1;NCOR1;TBL1XR1;MORF4L2;HAT1;OGT		R-HSA-3318486;R-HSA-3321975;R-HSA-5216234;R-HSA-5218952;R-HSA-5205799;R-HSA-3215385;R-HSA-3215448;R-HSA-5205861;R-HSA-5661117;R-HSA-3215391;R-HSA-3777129;R-HSA-3215426;R-HSA-3662318;R-HSA-3769447;R-HSA-3321805;R-HSA-3215406
R-HSA-3247509	Chromatin modifying enzymes	14	257	0.0183795	0.199348	0.343387	16	84	0.00712589	9606	Homo sapiens	PRMT5;SMARCD1;SMARCC1;BRPF1;ARID4B;CHD3;ARID1B;NCOR2;MORF4L1;NCOR1;TBL1XR1;MORF4L2;HAT1;OGT		R-HSA-3318486;R-HSA-3321975;R-HSA-5216234;R-HSA-5218952;R-HSA-5205799;R-HSA-3215385;R-HSA-3215448;R-HSA-5205861;R-HSA-5661117;R-HSA-3215391;R-HSA-3777129;R-HSA-3215426;R-HSA-3662318;R-HSA-3769447;R-HSA-3321805;R-HSA-3215406
R-HSA-68875	Mitotic Prophase	8	133	0.00951155	0.201259	0.343387	15	34	0.00288429	9606	Homo sapiens	SET;NUMA1;PPP2R1A;TPR;LMNA;CDK1;PRKACA		R-HSA-2245218;R-HSA-2430533;R-HSA-5229194;R-HSA-5195402;R-HSA-2993898;R-HSA-5223304;R-HSA-2294600;R-HSA-5244669;R-HSA-2990880;R-HSA-2990882;R-HSA-2984220;R-HSA-2429719;R-HSA-380278;R-HSA-2172183;R-HSA-2430552
R-HSA-201681	TCF dependent signaling in response to WNT	12	216	0.0154473	0.20364	0.343387	9	71	0.00602307	9606	Homo sapiens	PSMD8;PSMA6;PSMD11;PSMA4;XPO1;PSMB5;PSMA2;PSMD5;PPP2R1A;PSMB1;CDC73;PSMA7		R-HSA-201685;R-HSA-3769391;R-HSA-3601585;R-HSA-1504193;R-HSA-3769392;R-HSA-4641260;R-HSA-3322424;R-HSA-3640874;R-HSA-4641256
R-HSA-167158	Formation of the HIV-1 Early Elongation Complex	3	37	0.00264607	0.205157	0.343387	5	5	0.000424	9606	Homo sapiens	NELFCD;GTF2F1;SUPT5H		R-HSA-167072;R-HSA-167089;R-HSA-167478;R-HSA-167083;R-HSA-167085
R-HSA-113418	Formation of the Early Elongation Complex	3	37	0.00264607	0.205157	0.343387	3	3	0.000254	9606	Homo sapiens	NELFCD;GTF2F1;SUPT5H		R-HSA-113402;R-HSA-113407;R-HSA-112383
R-HSA-141430	Inactivation of APC/C via direct inhibition of the APC/C complex	2	20	0.00143031	0.205982	0.343387	2	2	0.00017	9606	Homo sapiens	ANAPC7;BUB3		R-HSA-141423;R-HSA-141437
R-HSA-141405	Inhibition of the proteolytic activity of APC/C required for the onset of anaphase by mitotic spindle checkpoint components	2	20	0.00143031	0.205982	0.343387	2	3	0.000254	9606	Homo sapiens	ANAPC7;BUB3		R-HSA-141423;R-HSA-141437
R-HSA-1362300	Transcription of E2F targets under negative control by p107 (RBL1) and p130 (RBL2) in complex with HDAC1	2	20	0.00143031	0.205982	0.343387	2	8	0.000679	9606	Homo sapiens	CDK1		R-HSA-8961934;R-HSA-8964567
R-HSA-194138	Signaling by VEGF	8	134	0.00958306	0.206616	0.343387	35	83	0.00704106	9606	Homo sapiens	HSP90AA1;AHCYL1;FYN;PRKACA;PAK2;MTOR		R-HSA-5218828;R-HSA-5218826;R-HSA-5218824;R-HSA-5218823;R-HSA-5218822;R-HSA-5218821;R-HSA-202127;R-HSA-5218847;R-HSA-169683;R-HSA-202129;R-HSA-5357445;R-HSA-5218839;R-HSA-5218838;R-HSA-202137;R-HSA-5218643;R-HSA-5218832;R-HSA-202144;R-HSA-5218855;R-HSA-5218854;R-HSA-5218851;R-HSA-1497784;R-HSA-5218814;R-HSA-5357472;R-HSA-5218813;R-HSA-5218812;R-HSA-198640;R-HSA-5218811;R-HSA-5357477;R-HSA-5218809…
R-HSA-1169410	Antiviral mechanism by IFN-stimulated genes	6	94	0.00672245	0.20699	0.343387	5	31	0.00262979	9606	Homo sapiens	EIF4A1;TPR;UBE2N;ABCE1;EIF4G2;EIF4G1		R-HSA-1678842;R-HSA-8985201;R-HSA-8985123;R-HSA-1176059;R-HSA-1169402
R-HSA-5620924	Intraflagellar transport	4	56	0.00400486	0.211629	0.343387	8	12	0.00101798	9606	Homo sapiens	TUBB4B;TNPO1;TUBA4A		R-HSA-5624949;R-HSA-5624948;R-HSA-5624951;R-HSA-5625424;R-HSA-5625426;R-HSA-5625421;R-HSA-5624952;R-HSA-5625416
R-HSA-6781823	Formation of TC-NER Pre-Incision Complex	4	56	0.00400486	0.211629	0.343387	4	7	0.000594	9606	Homo sapiens	COPS4;CUL4A;COPS2;TCEA1		R-HSA-6782069;R-HSA-6782004;R-HSA-6781867;R-HSA-6781833
R-HSA-1538133	G0 and Early G1	3	38	0.00271759	0.215968	0.343387	6	27	0.00229047	9606	Homo sapiens	CDK2;CDK1		R-HSA-1363303;R-HSA-8961934;R-HSA-1363314;R-HSA-1363311;R-HSA-1363306;R-HSA-8964567
R-HSA-70268	Pyruvate metabolism	4	57	0.00407638	0.220374	0.343387	4	15	0.00127248	9606	Homo sapiens	LDHB;LDHA;GLO1		R-HSA-5694071;R-HSA-6807826;R-HSA-71849;R-HSA-70510
R-HSA-5633007	Regulation of TP53 Activity	10	178	0.0127297	0.220777	0.343387	14	98	0.00831354	9606	Homo sapiens	PRMT5;SUPT16H;BRPF1;PPP2R1A;CDK2;RPA1;CDK1;SSRP1;CHD3;MTOR		R-HSA-6792871;R-HSA-6805638;R-HSA-6805061;R-HSA-6799332;R-HSA-6805059;R-HSA-6805640;R-HSA-6805109;R-HSA-6805620;R-HSA-6805650;R-HSA-6792863;R-HSA-6804383;R-HSA-6793661;R-HSA-6804379;R-HSA-6795290
R-HSA-430039	mRNA decay by 5' to 3' exoribonuclease	2	21	0.00150182	0.221298	0.343387	1	3	0.000254	9606	Homo sapiens	DCP1A;EDC3		R-HSA-429860
R-HSA-69200	Phosphorylation of proteins involved in G1/S transition by active Cyclin E:Cdk2 complexes	1	6	0.000429	0.223035	0.343387	1	1	8.48e-05	9606	Homo sapiens	CDK2		R-HSA-188390
R-HSA-5626978	TNFR1-mediated ceramide production	1	6	0.000429	0.223035	0.343387	2	3	0.000254	9606	Homo sapiens	GNB2L1		R-HSA-5626981;R-HSA-5626982
R-HSA-8866911	TFAP2 (AP-2) family regulates transcription of cell cycle factors	1	6	0.000429	0.223035	0.343387	2	4	0.000339	9606	Homo sapiens	TFAP2A		R-HSA-8865244;R-HSA-8865256
R-HSA-71737	Pyrophosphate hydrolysis	1	6	0.000429	0.223035	0.343387	1	2	0.00017	9606	Homo sapiens	PPA1		R-HSA-71732
R-HSA-389356	CD28 co-stimulation	3	39	0.0027891	0.226895	0.343387	11	19	0.00161181	9606	Homo sapiens	FYN;PAK2;MTOR		R-HSA-389381;R-HSA-389348;R-HSA-389158;R-HSA-389350;R-HSA-198640;R-HSA-388832;R-HSA-389788;R-HSA-388831;R-HSA-388814;R-HSA-389352;R-HSA-389354
R-HSA-445989	TAK1 activates NFkB by phosphorylation and activation of IKKs complex	3	39	0.0027891	0.226895	0.343387	2	4	0.000339	9606	Homo sapiens	UBE2N;HMGB1;UBE2V1		R-HSA-168166;R-HSA-168184
R-HSA-8939243	RUNX1 interacts with co-factors whose precise effect on RUNX1 targets is not known	3	39	0.0027891	0.226895	0.343387	1	5	0.000424	9606	Homo sapiens	SMARCD1;SMARCC1;ARID1B		R-HSA-8938217
R-HSA-9006925	Intracellular signaling by second messengers	18	351	0.0251019	0.228788	0.343387	40	105	0.00890736	9606	Homo sapiens	AHCYL1;PSMD11;CHD3;PSMA7;MTOR;PSMD8;PSMA6;PSMA4;PSMB5;PSMA2;PSMD5;PPP2R1A;AGO2;PSMB1;FYN;PRKACA		R-HSA-8944457;R-HSA-8857925;R-HSA-8944522;R-HSA-2318752;R-HSA-8948621;R-HSA-8948623;R-HSA-8948612;R-HSA-8944454;R-HSA-169683;R-HSA-8948569;R-HSA-8944538;R-HSA-6811504;R-HSA-6811454;R-HSA-111966;R-HSA-8944599;R-HSA-8944104;R-HSA-111970;R-HSA-8948651;R-HSA-8944684;R-HSA-8948524;R-HSA-8945709;R-HSA-8951727;R-HSA-8948641;R-HSA-8944483;R-HSA-8943780;R-HSA-111919;R-HSA-8948582;R-HSA-8948583;R-HSA-89446…
R-HSA-2514856	The phototransduction cascade	4	58	0.00414789	0.229213	0.343387	3	27	0.00229047	9606	Homo sapiens	NMT1;PRKACA;METAP2		R-HSA-2534087;R-HSA-2534096;R-HSA-74615
R-HSA-5653656	Vesicle-mediated transport	39	820	0.0586426	0.236263	0.343387	84	251	0.0212928	9606	Homo sapiens	SEC23A;COPA;DCTN2;DCTN1;GDI2;GOLIM4;NEDD8;KIF11;KLC1;TFG;KIF5B;PPP6R3;PACSIN2;SNX9;CD55;TPD52;DYNC1H1;SEC13;HSP90AA1;GALNT1;SEC16A;TUBB4B;PUM1;TUBA4A;DNM2;ARCN1;COPS4;KIF2A;ALPP;COPS2;COPG1;SEC24C;PAFAH1B3;COPE;PAFAH1B2;PAFAH1B1		R-HSA-8868230;R-HSA-5694421;R-HSA-5694418;R-HSA-8847875;R-HSA-5694417;R-HSA-8868236;R-HSA-8877451;R-HSA-8847635;R-HSA-2316347;R-HSA-8876191;R-HSA-8876190;R-HSA-5694415;R-HSA-5694413;R-HSA-8876188;R-HSA-8871194;R-HSA-8871193;R-HSA-5694409;R-HSA-190877;R-HSA-8876454;R-HSA-6807877;R-HSA-8876837;R-HSA-6807875;R-HSA-8877475;R-HSA-8876193;R-HSA-6807872;R-HSA-8877998;R-HSA-8877612;R-HSA-8868651;R-HSA-21…
R-HSA-163615	PKA activation	2	22	0.00157334	0.236701	0.343387	2	3	0.000254	9606	Homo sapiens	PRKACA		R-HSA-111925;R-HSA-8951727
R-HSA-111996	Ca-dependent events	3	40	0.00286062	0.237924	0.343387	6	18	0.00152698	9606	Homo sapiens	PRKACA		R-HSA-111970;R-HSA-111925;R-HSA-111924;R-HSA-8951727;R-HSA-111919;R-HSA-111966
R-HSA-418597	G alpha (z) signalling events	4	60	0.00429093	0.247144	0.343387	8	10	0.000848	9606	Homo sapiens	GNAS;GNB4;PRKACA		R-HSA-392129;R-HSA-8982703;R-HSA-749453;R-HSA-750988;R-HSA-751040;R-HSA-751024;R-HSA-8982709;R-HSA-749446
R-HSA-174048	APC/C:Cdc20 mediated degradation of Cyclin B	2	23	0.00164485	0.252157	0.343387	3	3	0.000254	9606	Homo sapiens	ANAPC7;CDK1		R-HSA-174227;R-HSA-174120;R-HSA-174157
R-HSA-844456	The NLRP3 inflammasome	2	23	0.00164485	0.252157	0.343387	10	18	0.00152698	9606	Homo sapiens	HSP90AA1;TXN		R-HSA-873951;R-HSA-844440;R-HSA-1296421;R-HSA-844612;R-HSA-874087;R-HSA-1250280;R-HSA-1250264;R-HSA-1250253;R-HSA-844610;R-HSA-1306876
R-HSA-156711	Polo-like kinase mediated events	2	23	0.00164485	0.252157	0.343387	2	15	0.00127248	9606	Homo sapiens	CENPF		R-HSA-4088441;R-HSA-4088439
R-HSA-3065678	SUMO is transferred from E1 to E2 (UBE2I, UBC9)	1	7	0.000501	0.255045	0.343387	3	3	0.000254	9606	Homo sapiens	UBA2		R-HSA-2993790;R-HSA-2993769;R-HSA-2993780
R-HSA-3248023	Regulation by TREX1	1	7	0.000501	0.255045	0.343387	2	2	0.00017	9606	Homo sapiens	TREX1		R-HSA-3245943;R-HSA-3244605
R-HSA-68911	G2 Phase	1	7	0.000501	0.255045	0.343387	2	2	0.00017	9606	Homo sapiens	CDK2		R-HSA-187937;R-HSA-187959
R-HSA-9032759	NTRK2 activates RAC1	1	7	0.000501	0.255045	0.343387	2	2	0.00017	9606	Homo sapiens	FYN		R-HSA-9032761;R-HSA-9032798
R-HSA-69478	G2/M DNA replication checkpoint	1	7	0.000501	0.255045	0.343387	2	2	0.00017	9606	Homo sapiens	CDK1		R-HSA-170070;R-HSA-170055
R-HSA-9022535	Loss of phosphorylation of MECP2 at T308	1	7	0.000501	0.255045	0.343387	1	1	8.48e-05	9606	Homo sapiens	PRKACA		R-HSA-9005561
R-HSA-5619062	Defective SLC1A3 causes episodic ataxia 6 (EA6)	1	7	0.000501	0.255045	0.343387	1	1	8.48e-05	9606	Homo sapiens	SLC1A3		R-HSA-5625015
R-HSA-426496	Post-transcriptional silencing by small RNAs	1	7	0.000501	0.255045	0.343387	2	3	0.000254	9606	Homo sapiens	AGO2		R-HSA-426520;R-HSA-426489
R-HSA-110381	Resolution of AP sites via the single-nucleotide replacement pathway	1	7	0.000501	0.255045	0.343387	2	6	0.000509	9606	Homo sapiens	APEX1		R-HSA-110375;R-HSA-110360
R-HSA-8866376	Reelin signalling pathway	1	7	0.000501	0.255045	0.343387	1	4	0.000339	9606	Homo sapiens	FYN		R-HSA-8855237
R-HSA-76002	Platelet activation, signaling and aggregation	15	293	0.020954	0.25606	0.343387	49	114	0.00967085	9606	Homo sapiens	PRPF38B;WDR1;ANXA5;ACTN4;TUBA4A;CFL1;GNB4;FYN;TAGLN2;TLN1;ALDOA;PRKACA;PFN1;PPIA;VCL		R-HSA-443910;R-HSA-392195;R-HSA-443905;R-HSA-429441;R-HSA-396941;R-HSA-397835;R-HSA-392202;R-HSA-418581;R-HSA-418579;R-HSA-418576;R-HSA-354066;R-HSA-354077;R-HSA-354073;R-HSA-354087;R-HSA-377644;R-HSA-114600;R-HSA-377641;R-HSA-377640;R-HSA-377643;R-HSA-354097;R-HSA-453183;R-HSA-139842;R-HSA-396996;R-HSA-397891;R-HSA-428750;R-HSA-354124;R-HSA-428749;R-HSA-372693;R-HSA-482775;R-HSA-482772;R-HSA-453…
R-HSA-432722	Golgi Associated Vesicle Biogenesis	4	61	0.00436244	0.256223	0.343387	5	7	0.000594	9606	Homo sapiens	TPD52;SNX9;PUM1;DNM2		R-HSA-421831;R-HSA-421836;R-HSA-434362;R-HSA-421835;R-HSA-421833
R-HSA-8866654	E3 ubiquitin ligases ubiquitinate target proteins	4	61	0.00436244	0.256223	0.343387	10	16	0.00135731	9606	Homo sapiens	UBE2N;CDC73;RAD18;RNF40		R-HSA-8943003;R-HSA-8939323;R-HSA-8938829;R-HSA-8938815;R-HSA-8943007;R-HSA-8943040;R-HSA-8943041;R-HSA-8942099;R-HSA-8942101;R-HSA-8939335
R-HSA-1236974	ER-Phagosome pathway	9	164	0.0117285	0.256662	0.343387	1	10	0.000848	9606	Homo sapiens	PSMD8;PSMA6;PSMD11;PSMA4;PSMB5;PSMA2;PSMD5;PSMB1;PSMA7		R-HSA-1236935
R-HSA-8868773	rRNA processing in the nucleus and cytosol	11	207	0.0148037	0.258502	0.343387	3	15	0.00127248	9606	Homo sapiens	LTV1;TRMT112;RPS25;NOB1;RPS18;RPS3;RPL38;RPS20;RPSA;RPS21;RPS12		R-HSA-6791223;R-HSA-6790982;R-HSA-6791218
R-HSA-165054	Rev-mediated nuclear export of HIV RNA	3	42	0.00300365	0.260237	0.343387	7	10	0.000848	9606	Homo sapiens	RANBP1;XPO1;TPR		R-HSA-180739;R-HSA-165043;R-HSA-165047;R-HSA-165028;R-HSA-180885;R-HSA-165034;R-HSA-165055
R-HSA-70614	Amino acid synthesis and interconversion (transamination)	5	82	0.00586426	0.264505	0.343387	6	35	0.00296912	9606	Homo sapiens	PYCRL;GOT1;PSAT1;ASNS;PHGDH		R-HSA-70592;R-HSA-6783955;R-HSA-70581;R-HSA-70599;R-HSA-977348;R-HSA-977333
R-HSA-937041	IKK complex recruitment mediated by RIP1	2	24	0.00171637	0.267638	0.343387	1	3	0.000254	9606	Homo sapiens	UBE2N;UBE2V1		R-HSA-168915
R-HSA-392517	Rap1 signalling	2	24	0.00171637	0.267638	0.343387	1	7	0.000594	9606	Homo sapiens	PRKACA		R-HSA-913996
R-HSA-1169408	ISG15 antiviral mechanism	5	83	0.00593578	0.272426	0.343387	3	16	0.00135731	9606	Homo sapiens	EIF4A1;TPR;UBE2N;EIF4G2;EIF4G1		R-HSA-1678842;R-HSA-1176059;R-HSA-1169402
R-HSA-112043	PLC beta mediated events	4	63	0.00450547	0.274571	0.343387	7	23	0.00195114	9606	Homo sapiens	AHCYL1;PRKACA		R-HSA-169683;R-HSA-111970;R-HSA-111925;R-HSA-111924;R-HSA-8951727;R-HSA-111919;R-HSA-111966
R-HSA-111885	Opioid Signalling	6	104	0.0074376	0.275199	0.343387	16	49	0.00415677	9606	Homo sapiens	AHCYL1;PPP2R1A;GNB4;PRKACA		R-HSA-111970;R-HSA-177284;R-HSA-8951727;R-HSA-167429;R-HSA-180073;R-HSA-167433;R-HSA-111919;R-HSA-112271;R-HSA-169683;R-HSA-167408;R-HSA-111925;R-HSA-111924;R-HSA-177275;R-HSA-167419;R-HSA-201790;R-HSA-111966
R-HSA-6791226	Major pathway of rRNA processing in the nucleolus and cytosol	10	189	0.0135164	0.276015	0.343387	2	7	0.000594	9606	Homo sapiens	LTV1;RPS25;NOB1;RPS18;RPS3;RPL38;RPS20;RPSA;RPS21;RPS12		R-HSA-6791223;R-HSA-6791218
R-HSA-1280218	Adaptive Immune System	46	997	0.0713009	0.278171	0.343387	51	261	0.0221412	9606	Homo sapiens	SEC23A;PSMD11;AHCYL1;DCTN2;DCTN1;UBR4;PTPRJ;KIF11;KLC1;PSMA7;PSMD8;PSMB5;PSMD5;PPP2R1A;KIF5B;PSMB1;FYN;PRKACA;PAK2;BTF3;VASP;DYNC1H1;SEC13;ANAPC7;LMO7;TUBB4B;TUBA4A;MTOR;DNM2;ENAH;PSMA6;PSMA4;KIF2A;PSMA2;UBE2N;TPP2;UBA1;UBE2V1;SEC24C;PPIA		R-HSA-389381;R-HSA-2025882;R-HSA-2130725;R-HSA-2130731;R-HSA-983426;R-HSA-983425;R-HSA-983424;R-HSA-1168640;R-HSA-983709;R-HSA-389532;R-HSA-389788;R-HSA-2130619;R-HSA-2213248;R-HSA-389158;R-HSA-202534;R-HSA-390329;R-HSA-913996;R-HSA-8951498;R-HSA-203979;R-HSA-388814;R-HSA-388809;R-HSA-169683;R-HSA-1236935;R-HSA-202453;R-HSA-388829;R-HSA-8851038;R-HSA-2213243;R-HSA-388831;R-HSA-983150;R-HSA-389348…
R-HSA-73886	Chromosome Maintenance	6	105	0.00750912	0.282309	0.343387	14	27	0.00229047	9606	Homo sapiens	PRIM2;FEN1;POLD1;POLE3;RPA1;TPP1		R-HSA-174438;R-HSA-181450;R-HSA-174441;R-HSA-174446;R-HSA-174444;R-HSA-174445;R-HSA-174451;R-HSA-174448;R-HSA-174452;R-HSA-174427;R-HSA-174456;R-HSA-174425;R-HSA-176702;R-HSA-176700
R-HSA-5218920	VEGFR2 mediated vascular permeability	3	44	0.00314668	0.282805	0.343387	11	15	0.00127248	9606	Homo sapiens	HSP90AA1;PAK2;MTOR		R-HSA-5357472;R-HSA-202129;R-HSA-202144;R-HSA-198640;R-HSA-5357445;R-HSA-5357477;R-HSA-202137;R-HSA-5357483;R-HSA-202111;R-HSA-202127;R-HSA-1497784
R-HSA-177243	Interactions of Rev with host cellular proteins	3	44	0.00314668	0.282805	0.343387	9	16	0.00135731	9606	Homo sapiens	RANBP1;XPO1;TPR		R-HSA-180739;R-HSA-165043;R-HSA-180710;R-HSA-165047;R-HSA-165028;R-HSA-180885;R-HSA-165034;R-HSA-165055;R-HSA-180732
R-HSA-389513	CTLA4 inhibitory signaling	2	25	0.00178788	0.283113	0.343387	5	5	0.000424	9606	Homo sapiens	PPP2R1A;FYN		R-HSA-388833;R-HSA-388829;R-HSA-389532;R-HSA-390329;R-HSA-388809
R-HSA-179409	APC-Cdc20 mediated degradation of Nek2A	2	25	0.00178788	0.283113	0.343387	3	3	0.000254	9606	Homo sapiens	ANAPC7;BUB3		R-HSA-179410;R-HSA-179417;R-HSA-179421
R-HSA-162594	Early Phase of HIV Life Cycle	2	25	0.00178788	0.283113	0.343387	26	38	0.00322362	9606	Homo sapiens	FEN1;PPIA		R-HSA-8951690;R-HSA-173642;R-HSA-173771;R-HSA-182795;R-HSA-182859;R-HSA-173769;R-HSA-164503;R-HSA-164500;R-HSA-164507;R-HSA-164504;R-HSA-164505;R-HSA-164510;R-HSA-182876;R-HSA-164508;R-HSA-164509;R-HSA-164515;R-HSA-164512;R-HSA-164513;R-HSA-164519;R-HSA-164520;R-HSA-164521;R-HSA-164527;R-HSA-164524;R-HSA-164528;R-HSA-173111;R-HSA-173115
R-HSA-111931	PKA-mediated phosphorylation of CREB	2	25	0.00178788	0.283113	0.343387	4	6	0.000509	9606	Homo sapiens	PRKACA		R-HSA-111925;R-HSA-111924;R-HSA-8951727;R-HSA-111919
R-HSA-373753	Nephrin family interactions	2	25	0.00178788	0.283113	0.343387	8	13	0.00110282	9606	Homo sapiens	FYN;ACTN4		R-HSA-532603;R-HSA-373734;R-HSA-373747;R-HSA-8981534;R-HSA-451758;R-HSA-373724;R-HSA-373727;R-HSA-451403
R-HSA-112040	G-protein mediated events	4	64	0.00457699	0.283827	0.343387	7	32	0.00271463	9606	Homo sapiens	AHCYL1;PRKACA		R-HSA-169683;R-HSA-111970;R-HSA-111925;R-HSA-111924;R-HSA-8951727;R-HSA-111919;R-HSA-111966
R-HSA-164525	Plus-strand DNA synthesis	1	8	0.000572	0.285738	0.343387	4	4	0.000339	9606	Homo sapiens	PPIA		R-HSA-164512;R-HSA-164513;R-HSA-164505;R-HSA-173769
R-HSA-3065676	SUMO is conjugated to E1 (UBA2:SAE1)	1	8	0.000572	0.285738	0.343387	3	3	0.000254	9606	Homo sapiens	UBA2		R-HSA-2993784;R-HSA-2993781;R-HSA-2990833
R-HSA-8849470	PTK6 Regulates Cell Cycle	1	8	0.000572	0.285738	0.343387	2	2	0.00017	9606	Homo sapiens	CDK2		R-HSA-8848436;R-HSA-8848414
R-HSA-8937144	Aryl hydrocarbon receptor signalling	1	8	0.000572	0.285738	0.343387	3	5	0.000424	9606	Homo sapiens	HSP90AA1		R-HSA-8937169;R-HSA-8936849;R-HSA-8937191
R-HSA-389397	Orexin and neuropeptides FF and QRFP bind to their respective receptors	1	8	0.000572	0.285738	0.343387	2	4	0.000339	9606	Homo sapiens	PPOX		R-HSA-389487;R-HSA-389481
R-HSA-6791465	Pentose phosphate pathway disease	1	8	0.000572	0.285738	0.343387	2	4	0.000339	9606	Homo sapiens	TALDO1		R-HSA-5659989;R-HSA-5659998
R-HSA-176417	Phosphorylation of Emi1	1	8	0.000572	0.285738	0.343387	1	2	0.00017	9606	Homo sapiens	CDK1		R-HSA-174122
R-HSA-446388	Regulation of cytoskeletal remodeling and cell spreading by IPP complex components	1	8	0.000572	0.285738	0.343387	2	5	0.000424	9606	Homo sapiens	PARVA		R-HSA-446372;R-HSA-446322
R-HSA-5674499	Negative feedback regulation of MAPK pathway	1	8	0.000572	0.285738	0.343387	1	3	0.000254	9606	Homo sapiens	MAP2K2		R-HSA-5674496
R-HSA-110328	Recognition and association of DNA glycosylase with site containing an affected pyrimidine	1	8	0.000572	0.285738	0.343387	4	17	0.00144214	9606	Homo sapiens	NTHL1		R-HSA-110208;R-HSA-110211;R-HSA-110213;R-HSA-110212
R-HSA-163765	ChREBP activates metabolic gene expression	1	8	0.000572	0.285738	0.343387	1	6	0.000509	9606	Homo sapiens	ACLY		R-HSA-163770
R-HSA-157118	Signaling by NOTCH	13	257	0.0183795	0.289198	0.343387	15	152	0.0128945	9606	Homo sapiens	PSMD11;PSMA7;NCOR2;PSMD8;PSMA6;NCOR1;PSMA4;PSMB5;TBL1XR1;PSMA2;PSMD5;AGO2;PSMB1		R-HSA-1912413;R-HSA-1912412;R-HSA-1606682;R-HSA-1912409;R-HSA-1912410;R-HSA-1912406;R-HSA-1912368;R-HSA-9604642;R-HSA-1912364;R-HSA-1912367;R-HSA-1912366;R-HSA-1912363;R-HSA-1912362;R-HSA-1912388;R-HSA-1606561
R-HSA-168249	Innate Immune System	59	1302	0.0931131	0.292587	0.343387	73	651	0.0552257	9606	Homo sapiens	GPI;AHCYL1;GDI2;PTPRJ;HMGB1;PSMD8;PSMD5;PPP2R1A;CFL1;CPNE1;PRKACA;PGM1;CBR1;CCT2;SERPINB1;HSP90AA1;PGAM1;NME2;MIF;SERPINB6;DNM2;ACLY;PSMA6;PKM;PSMA4;PSMA2;UBE2V1;ALDOA;PPIA;VCL;PAFAH1B2;PSMD11;UBR4;TXN;PSMA7;CAND1;PSMB5;COMMD9;PSMB1;FYN;CCT8;LTA4H;PAK2;CD55;DYNC1H1;TREX1;PA2G4;TUBB4B;EEF2;PRDX6;DIAPH1;IMPDH1;IMPDH2;UBE2N;HSPA1B		R-HSA-975118;R-HSA-2424484;R-HSA-741386;R-HSA-2424486;R-HSA-688137;R-HSA-2424487;R-HSA-2424480;R-HSA-2424482;R-HSA-2395439;R-HSA-3244605;R-HSA-2029459;R-HSA-879362;R-HSA-6799350;R-HSA-981535;R-HSA-199959;R-HSA-844440;R-HSA-2396594;R-HSA-5607757;R-HSA-5607756;R-HSA-975122;R-HSA-1834939;R-HSA-2730889;R-HSA-202534;R-HSA-450337;R-HSA-5432825;R-HSA-450346;R-HSA-2730887;R-HSA-2395412;R-HSA-2730904;R-HS…
R-HSA-5675221	Negative regulation of MAPK pathway	3	45	0.00321819	0.294154	0.343387	3	12	0.00101798	9606	Homo sapiens	MAP2K2;PPP2R1A;PEBP1		R-HSA-5675431;R-HSA-5674496;R-HSA-5675417
R-HSA-389357	CD28 dependent PI3K/Akt signaling	2	26	0.0018594	0.298559	0.343387	3	9	0.000763	9606	Homo sapiens	FYN;MTOR		R-HSA-389158;R-HSA-198640;R-HSA-388832
R-HSA-450321	JNK (c-Jun kinases) phosphorylation and activation mediated by activated human TAK1	2	26	0.0018594	0.298559	0.343387	1	3	0.000254	9606	Homo sapiens	UBE2N;UBE2V1		R-HSA-450337
R-HSA-977347	Serine biosynthesis	2	26	0.0018594	0.298559	0.343387	2	7	0.000594	9606	Homo sapiens	PSAT1;PHGDH		R-HSA-977348;R-HSA-977333
R-HSA-3322077	Glycogen synthesis	2	26	0.0018594	0.298559	0.343387	1	22	0.0018663	9606	Homo sapiens	PGM1		R-HSA-70272
R-HSA-8878171	Transcriptional regulation by RUNX1	13	261	0.0186655	0.307544	0.343387	8	132	0.0111978	9606	Homo sapiens	SMARCD1;SMARCC1;PSMD11;ARID1B;PSMA7;PSMD8;PSMA6;PSMA4;PSMB5;PSMA2;PSMD5;AGO2;PSMB1		R-HSA-8935864;R-HSA-8938217;R-HSA-8935785;R-HSA-8939129;R-HSA-8935930;R-HSA-8936058;R-HSA-8957265;R-HSA-8936068
R-HSA-5693538	Homology Directed Repair	7	130	0.009297	0.308338	0.343387	21	50	0.0042416	9606	Homo sapiens	FEN1;PARP1;POLD1;CDK2;POLE3;RPA1;UBE2N		R-HSA-5684887;R-HSA-5684052;R-HSA-5686642;R-HSA-5684882;R-HSA-5685011;R-HSA-5687664;R-HSA-5684081;R-HSA-5693564;R-HSA-5687484;R-HSA-5687640;R-HSA-5693593;R-HSA-5693561;R-HSA-5693542;R-HSA-5684071;R-HSA-5685156;R-HSA-5687653;R-HSA-5684096;R-HSA-5686657;R-HSA-5687758;R-HSA-5693580;R-HSA-5684875
R-HSA-1227986	Signaling by ERBB2	4	67	0.00479153	0.311843	0.343387	6	43	0.00364778	9606	Homo sapiens	DIAPH1;HSP90AA1;FYN;PRKACA		R-HSA-1918092;R-HSA-1918095;R-HSA-8934446;R-HSA-6785648;R-HSA-1963589;R-HSA-1963586
R-HSA-1989781	PPARA activates gene expression	9	174	0.0124437	0.312476	0.343387	41	41	0.00347811	9606	Homo sapiens	NCOR2;MED12;NCOR1;TBL1XR1;TXNRD1;FHL2;MED27		R-HSA-1655826;R-HSA-1989778;R-HSA-1989779;R-HSA-560517;R-HSA-1989776;R-HSA-1989777;R-HSA-1989774;R-HSA-560473;R-HSA-1989775;R-HSA-1989772;R-HSA-1989773;R-HSA-1989770;R-HSA-1368065;R-HSA-1989771;R-HSA-1989768;R-HSA-1989767;R-HSA-1989764;R-HSA-1989765;R-HSA-1989762;R-HSA-1989760;R-HSA-1989761;R-HSA-1989758;R-HSA-1989759;R-HSA-879724;R-HSA-1989756;R-HSA-1989757;R-HSA-1989754;R-HSA-1989755;R-HSA-1989…
R-HSA-450302	activated TAK1 mediates p38 MAPK activation	2	27	0.00193092	0.31395	0.343387	1	5	0.000424	9606	Homo sapiens	UBE2N;UBE2V1		R-HSA-450346
R-HSA-175474	Assembly Of The HIV Virion	2	27	0.00193092	0.31395	0.343387	2	16	0.00135731	9606	Homo sapiens	NMT1;PPIA		R-HSA-184392;R-HSA-3149454
R-HSA-70221	Glycogen breakdown (glycogenolysis)	2	27	0.00193092	0.31395	0.343387	1	15	0.00127248	9606	Homo sapiens	PGM1		R-HSA-70427
R-HSA-8869496	TFAP2A acts as a transcriptional repressor during retinoic acid induced cell differentiation	1	9	0.000644	0.315168	0.343387	7	7	0.000594	9606	Homo sapiens	TFAP2A		R-HSA-8869543;R-HSA-8869558;R-HSA-8869542;R-HSA-8869568;R-HSA-8869566;R-HSA-8869549;R-HSA-8869560
R-HSA-163767	PP2A-mediated dephosphorylation of key metabolic factors	1	9	0.000644	0.315168	0.343387	4	4	0.000339	9606	Homo sapiens	PPP2R1A		R-HSA-163750;R-HSA-163688;R-HSA-164056;R-HSA-163689
R-HSA-8951671	RUNX3 regulates YAP1-mediated transcription	1	9	0.000644	0.315168	0.343387	3	3	0.000254	9606	Homo sapiens	TEAD1		R-HSA-8951676;R-HSA-8951695;R-HSA-1989766
R-HSA-5263617	Metabolism of ingested MeSeO2H into MeSeH	1	9	0.000644	0.315168	0.343387	2	2	0.00017	9606	Homo sapiens	TXNRD1		R-HSA-5263616;R-HSA-5263614
R-HSA-162585	Uncoating of the HIV Virion	1	9	0.000644	0.315168	0.343387	2	2	0.00017	9606	Homo sapiens	PPIA		R-HSA-173111;R-HSA-173642
R-HSA-113507	E2F-enabled inhibition of pre-replication complex formation	1	9	0.000644	0.315168	0.343387	1	1	8.48e-05	9606	Homo sapiens	CDK1		R-HSA-113638
R-HSA-2980767	Activation of NIMA Kinases NEK9, NEK6, NEK7	1	9	0.000644	0.315168	0.343387	1	4	0.000339	9606	Homo sapiens	CDK1		R-HSA-2984220
R-HSA-8964011	HDL clearance	1	9	0.000644	0.315168	0.343387	1	5	0.000424	9606	Homo sapiens	HDLBP		R-HSA-8858252
R-HSA-447043	Neurofascin interactions	1	9	0.000644	0.315168	0.343387	1	7	0.000594	9606	Homo sapiens	CNTNAP1		R-HSA-373733
R-HSA-9018519	Estrogen-dependent gene expression	8	153	0.0109419	0.317133	0.343387	12	66	0.00559891	9606	Homo sapiens	CDK9;HSP90AA1;JUND;CCNT1;AGO2;GTF2F1;FKBP4		R-HSA-9011961;R-HSA-9012315;R-HSA-9012203;R-HSA-9012186;R-HSA-9011997;R-HSA-9012319;R-HSA-9038161;R-HSA-9012208;R-HSA-9011971;R-HSA-9012196;R-HSA-9011975;R-HSA-9011958
R-HSA-400206	Regulation of lipid metabolism by Peroxisome proliferator-activated receptor alpha (PPARalpha)	9	176	0.0125867	0.323963	0.343387	43	44	0.00373261	9606	Homo sapiens	NCOR2;MED12;NCOR1;TBL1XR1;TXNRD1;FHL2;MED27		R-HSA-400143;R-HSA-1655826;R-HSA-1989778;R-HSA-1989779;R-HSA-560517;R-HSA-1989776;R-HSA-1989777;R-HSA-1989774;R-HSA-560473;R-HSA-1989775;R-HSA-1989772;R-HSA-1989773;R-HSA-1989770;R-HSA-1368065;R-HSA-1989771;R-HSA-1989768;R-HSA-1989767;R-HSA-1989764;R-HSA-1989765;R-HSA-1989762;R-HSA-1989760;R-HSA-1989761;R-HSA-1989758;R-HSA-1989759;R-HSA-879724;R-HSA-1989756;R-HSA-1989757;R-HSA-1989754;R-HSA-19897…
R-HSA-112409	RAF-independent MAPK1/3 activation	2	28	0.00200243	0.329265	0.343387	4	12	0.00101798	9606	Homo sapiens	MAP2K2;CDK1		R-HSA-109858;R-HSA-112342;R-HSA-109862;R-HSA-109864
R-HSA-6803205	TP53 regulates transcription of several additional cell death genes whose specific roles in p53-dependent apoptosis remain uncertain	2	28	0.00200243	0.329265	0.343387	2	19	0.00161181	9606	Homo sapiens	DRG1		R-HSA-5633314;R-HSA-5633295
R-HSA-168643	Nucleotide-binding domain, leucine rich repeat containing receptor (NLR) signaling pathways	4	69	0.00493456	0.330662	0.343387	13	45	0.00381744	9606	Homo sapiens	HSP90AA1;UBE2N;TXN;UBE2V1		R-HSA-741386;R-HSA-688137;R-HSA-844612;R-HSA-874087;R-HSA-1250264;R-HSA-844610;R-HSA-1306876;R-HSA-873951;R-HSA-844440;R-HSA-1296421;R-HSA-168184;R-HSA-1250280;R-HSA-1250253
R-HSA-165159	mTOR signalling	3	49	0.00350425	0.339723	0.343387	12	28	0.0023753	9606	Homo sapiens	MTOR;EIF4B;EIF4G1		R-HSA-165680;R-HSA-165777;R-HSA-165766;R-HSA-165718;R-HSA-447074;R-HSA-5653968;R-HSA-380979;R-HSA-377186;R-HSA-5672828;R-HSA-5672843;R-HSA-165692;R-HSA-5672824
R-HSA-6782315	tRNA modification in the nucleus and cytosol	4	70	0.00500608	0.340096	0.343387	6	37	0.00313878	9606	Homo sapiens	TRMT112;QARS;NSUN2;EPRS;PUS7		R-HSA-6786583;R-HSA-6786501;R-HSA-6782388;R-HSA-6785409;R-HSA-6785438;R-HSA-6782296
R-HSA-162589	Reverse Transcription of HIV RNA	1	10	0.000715	0.343387	0.343387	11	11	0.000933	9606	Homo sapiens	PPIA		R-HSA-164528;R-HSA-164512;R-HSA-164513;R-HSA-164503;R-HSA-164519;R-HSA-182795;R-HSA-182859;R-HSA-164520;R-HSA-164504;R-HSA-164505;R-HSA-173769
R-HSA-164516	Minus-strand DNA synthesis	1	10	0.000715	0.343387	0.343387	7	7	0.000594	9606	Homo sapiens	PPIA		R-HSA-164528;R-HSA-164503;R-HSA-164519;R-HSA-182795;R-HSA-182859;R-HSA-164520;R-HSA-164504
R-HSA-2470946	Cohesin Loading onto Chromatin	1	10	0.000715	0.343387	0.343387	2	2	0.00017	9606	Homo sapiens	WAPAL		R-HSA-2470935;R-HSA-2468040
R-HSA-203641	NOSTRIN mediated eNOS trafficking	1	10	0.000715	0.343387	0.343387	3	4	0.000339	9606	Homo sapiens	DNM2		R-HSA-203625;R-HSA-203662;R-HSA-203565
R-HSA-112313	Neurotransmitter uptake and metabolism In glial cells	1	10	0.000715	0.343387	0.343387	1	3	0.000254	9606	Homo sapiens	SLC1A3		R-HSA-210439
R-HSA-210455	Astrocytic Glutamate-Glutamine Uptake And Metabolism	1	10	0.000715	0.343387	0.343387	1	3	0.000254	9606	Homo sapiens	SLC1A3		R-HSA-210439
R-HSA-1296052	Ca2+ activated K+ channels	1	10	0.000715	0.343387	0.343387	1	3	0.000254	9606	Homo sapiens	PBXIP1		R-HSA-1296039
R-HSA-3371599	Defective HLCS causes multiple carboxylase deficiency	1	10	0.000715	0.343387	0.343387	1	4	0.000339	9606	Homo sapiens	PC		R-HSA-9035988
R-HSA-167160	RNA Pol II CTD phosphorylation and interaction with CE during HIV infection	2	29	0.00207395	0.344484	0.344484	5	5	0.000424	9606	Homo sapiens	GTF2F1;SUPT5H		R-HSA-167153;R-HSA-167111;R-HSA-167098;R-HSA-167128;R-HSA-167133
R-HSA-77075	RNA Pol II CTD phosphorylation and interaction with CE	2	29	0.00207395	0.344484	0.344484	5	5	0.000424	9606	Homo sapiens	GTF2F1;SUPT5H		R-HSA-77073;R-HSA-113430;R-HSA-77069;R-HSA-77068;R-HSA-77071
R-HSA-164952	The role of Nef in HIV-1 replication and disease pathogenesis	2	29	0.00207395	0.344484	0.344484	2	20	0.00169664	9606	Homo sapiens	FYN;PAK2		R-HSA-164943;R-HSA-200908
R-HSA-73762	RNA Polymerase I Transcription Initiation	3	50	0.00357577	0.351107	0.351107	4	6	0.000509	9606	Homo sapiens	CAST;RPA1;CHD3		R-HSA-73865;R-HSA-73739;R-HSA-73757;R-HSA-73758
R-HSA-73772	RNA Polymerase I Promoter Escape	2	30	0.00214546	0.35959	0.35959	1	1	8.48e-05	9606	Homo sapiens	CAST;RPA1		R-HSA-73769
R-HSA-5218921	VEGFR2 mediated cell proliferation	2	30	0.00214546	0.35959	0.35959	5	12	0.00101798	9606	Homo sapiens	AHCYL1;PRKACA		R-HSA-169683;R-HSA-5218813;R-HSA-5218823;R-HSA-5218821;R-HSA-5218805
R-HSA-5673000	RAF activation	2	30	0.00214546	0.35959	0.35959	3	10	0.000848	9606	Homo sapiens	MAP2K2;PPP2R1A		R-HSA-5672961;R-HSA-5672957;R-HSA-5672969
R-HSA-201451	Signaling by BMP	2	30	0.00214546	0.35959	0.35959	2	17	0.00144214	9606	Homo sapiens	MIF;FSTL1		R-HSA-201810;R-HSA-8858346
R-HSA-8963898	Plasma lipoprotein assembly	2	30	0.00214546	0.35959	0.35959	1	19	0.00161181	9606	Homo sapiens	PRKACA		R-HSA-5682101
R-HSA-8939211	ESR-mediated signaling	8	160	0.0114425	0.360621	0.360621	15	72	0.00610791	9606	Homo sapiens	CDK9;HSP90AA1;JUND;CCNT1;AGO2;GTF2F1;FKBP4		R-HSA-9012203;R-HSA-9032751;R-HSA-9011971;R-HSA-8939203;R-HSA-8939204;R-HSA-9012196;R-HSA-9011975;R-HSA-9011961;R-HSA-9012315;R-HSA-9012186;R-HSA-9011997;R-HSA-9012319;R-HSA-9038161;R-HSA-9012208;R-HSA-9011958
R-HSA-3928662	EPHB-mediated forward signaling	3	51	0.00364729	0.362469	0.362469	21	26	0.00220563	9606	Homo sapiens	CFL1;FYN;EPHB4		R-HSA-3928601;R-HSA-3928600;R-HSA-3928632;R-HSA-4093339;R-HSA-4093336;R-HSA-3928627;R-HSA-3928595;R-HSA-4093332;R-HSA-3928592;R-HSA-4093330;R-HSA-4093331;R-HSA-3928598;R-HSA-3928617;R-HSA-3928623;R-HSA-3928588;R-HSA-3928610;R-HSA-3928608;R-HSA-3928583;R-HSA-3928645;R-HSA-3928644;R-HSA-3928612
R-HSA-9032500	Activated NTRK2 signals through FYN	1	11	0.000787	0.370446	0.370446	7	7	0.000594	9606	Homo sapiens	FYN		R-HSA-9032601;R-HSA-9032761;R-HSA-9032798;R-HSA-9037040;R-HSA-9032532;R-HSA-9032582;R-HSA-9032502
R-HSA-112126	ALKBH3 mediated reversal of alkylation damage	1	11	0.000787	0.370446	0.370446	6	6	0.000509	9606	Homo sapiens	ASCC3		R-HSA-5657637;R-HSA-5657617;R-HSA-112123;R-HSA-112125;R-HSA-5657642;R-HSA-112124
R-HSA-73843	5-Phosphoribose 1-diphosphate biosynthesis	1	11	0.000787	0.370446	0.370446	2	2	0.00017	9606	Homo sapiens	PRPS1		R-HSA-73580;R-HSA-111215
R-HSA-444473	Formyl peptide receptors bind formyl peptides and many other ligands	1	11	0.000787	0.370446	0.370446	2	3	0.000254	9606	Homo sapiens	ANXA1		R-HSA-444476;R-HSA-391913
R-HSA-446107	Type I hemidesmosome assembly	1	11	0.000787	0.370446	0.370446	3	6	0.000509	9606	Homo sapiens	DST		R-HSA-446083;R-HSA-432956;R-HSA-446077
R-HSA-5652227	Fructose biosynthesis	1	11	0.000787	0.370446	0.370446	1	2	0.00017	9606	Homo sapiens	SORD		R-HSA-5652195
R-HSA-196025	Formation of annular gap junctions	1	11	0.000787	0.370446	0.370446	1	2	0.00017	9606	Homo sapiens	DNM2		R-HSA-196017
R-HSA-193634	Axonal growth inhibition (RHOA activation)	1	11	0.000787	0.370446	0.370446	2	6	0.000509	9606	Homo sapiens	ARHGDIA		R-HSA-9012761;R-HSA-193696
R-HSA-442380	Zinc influx into cells by the SLC39 gene family	1	11	0.000787	0.370446	0.370446	1	6	0.000509	9606	Homo sapiens	SLC39A10		R-HSA-442345
R-HSA-168274	Export of Viral Ribonucleoproteins from Nucleus	3	52	0.0037188	0.373799	0.373799	3	5	0.000424	9606	Homo sapiens	XPO1;TPR;HSPA1B		R-HSA-168880;R-HSA-192746;R-HSA-168857
R-HSA-3000157	Laminin interactions	2	31	0.00221698	0.374565	0.374565	12	15	0.00127248	9606	Homo sapiens	LAMA5;LAMC1		R-HSA-216051;R-HSA-2426676;R-HSA-2328145;R-HSA-216048;R-HSA-4084507;R-HSA-2426450;R-HSA-2396083;R-HSA-2426530;R-HSA-4084505;R-HSA-3907292;R-HSA-2327803;R-HSA-216058
R-HSA-203927	MicroRNA (miRNA) biogenesis	2	31	0.00221698	0.374565	0.374565	4	8	0.000679	9606	Homo sapiens	AGO2;DROSHA		R-HSA-203862;R-HSA-203893;R-HSA-210805;R-HSA-2106614
R-HSA-1236975	Antigen processing-Cross presentation	9	186	0.0133019	0.382384	0.382384	2	23	0.00195114	9606	Homo sapiens	PSMD8;PSMA6;PSMD11;PSMA4;PSMB5;PSMA2;PSMD5;PSMB1;PSMA7		R-HSA-1236935;R-HSA-1236970
R-HSA-2990846	SUMOylation	9	187	0.0133734	0.388283	0.388283	26	139	0.0117917	9606	Homo sapiens	TFAP2A;NCOR2;CBX5;PARP1;TRIM28;TPR;RPA1;UBA2;CHD3		R-HSA-2993769;R-HSA-4551616;R-HSA-8956365;R-HSA-4615872;R-HSA-3234081;R-HSA-5228508;R-HSA-2993790;R-HSA-2993784;R-HSA-2993781;R-HSA-2993780;R-HSA-2990833;R-HSA-4551768;R-HSA-5228525;R-HSA-3000399;R-HSA-4551649;R-HSA-5228523;R-HSA-3000348;R-HSA-4551604;R-HSA-4615987;R-HSA-3927886;R-HSA-3000411;R-HSA-4570493;R-HSA-4551679;R-HSA-4615933;R-HSA-4655355;R-HSA-3782535
R-HSA-8874081	MET activates PTK2 signaling	2	32	0.00228849	0.389395	0.389395	1	5	0.000424	9606	Homo sapiens	LAMA5;LAMC1		R-HSA-8874079
R-HSA-71406	Pyruvate metabolism and Citric Acid (TCA) cycle	5	98	0.00700851	0.394871	0.394871	5	36	0.00305395	9606	Homo sapiens	LDHB;LDHA;NNT;GLO1		R-HSA-5694071;R-HSA-6807826;R-HSA-71849;R-HSA-450971;R-HSA-70510
R-HSA-170984	ARMS-mediated activation	1	12	0.000858	0.396391	0.396391	6	6	0.000509	9606	Homo sapiens	KIDINS220		R-HSA-169891;R-HSA-169904;R-HSA-169905;R-HSA-169895;R-HSA-9612980;R-HSA-169901
R-HSA-112411	MAPK1 (ERK2) activation	1	12	0.000858	0.396391	0.396391	3	3	0.000254	9606	Homo sapiens	MAP2K2		R-HSA-109858;R-HSA-109862;R-HSA-109864
R-HSA-190873	Gap junction degradation	1	12	0.000858	0.396391	0.396391	3	4	0.000339	9606	Homo sapiens	DNM2		R-HSA-196017;R-HSA-190519;R-HSA-190829
R-HSA-193697	p75NTR regulates axonogenesis	1	12	0.000858	0.396391	0.396391	4	8	0.000679	9606	Homo sapiens	ARHGDIA		R-HSA-9012761;R-HSA-193696;R-HSA-193668;R-HSA-193646
R-HSA-8866907	Activation of the TFAP2 (AP-2) family of transcription factors	1	12	0.000858	0.396391	0.396391	2	4	0.000339	9606	Homo sapiens	TFAP2A		R-HSA-8864278;R-HSA-8864307
R-HSA-2179392	EGFR Transactivation by Gastrin	1	12	0.000858	0.396391	0.396391	2	6	0.000509	9606	Homo sapiens	PRKACA		R-HSA-2179413;R-HSA-400015
R-HSA-3323169	Defects in biotin (Btn) metabolism	1	12	0.000858	0.396391	0.396391	1	6	0.000509	9606	Homo sapiens	PC		R-HSA-9035988
R-HSA-73863	RNA Polymerase I Transcription Termination	2	33	0.00236001	0.404067	0.404067	3	4	0.000339	9606	Homo sapiens	CAST;RPA1		R-HSA-74993;R-HSA-74992;R-HSA-74994
R-HSA-622312	Inflammasomes	2	33	0.00236001	0.404067	0.404067	10	28	0.0023753	9606	Homo sapiens	HSP90AA1;TXN		R-HSA-873951;R-HSA-844440;R-HSA-1296421;R-HSA-844612;R-HSA-874087;R-HSA-1250280;R-HSA-1250264;R-HSA-1250253;R-HSA-844610;R-HSA-1306876
R-HSA-446203	Asparagine N-linked glycosylation	19	421	0.030108	0.409592	0.409592	23	143	0.012131	9606	Homo sapiens	DYNC1H1;SEC13;SEC23A;COPA;DCTN2;DCTN1;SEC16A;TUBB4B;TUBA4A;ARCN1;TFG;PPP6R3;COPG1;ANP32B;SEC24C;COPE;CD55		R-HSA-6807877;R-HSA-5694421;R-HSA-5694418;R-HSA-6807875;R-HSA-203973;R-HSA-6807872;R-HSA-5694417;R-HSA-6809006;R-HSA-5694527;R-HSA-204008;R-HSA-6809003;R-HSA-5694522;R-HSA-4084976;R-HSA-5694439;R-HSA-5694436;R-HSA-6809011;R-HSA-6809010;R-HSA-5694435;R-HSA-5694446;R-HSA-5694415;R-HSA-5694413;R-HSA-5694441;R-HSA-5694409
R-HSA-8986944	Transcriptional Regulation by MECP2	5	100	0.00715154	0.411308	0.411308	8	77	0.00653207	9606	Homo sapiens	NCOR2;NCOR1;TBL1XR1;AGO2;PRKACA		R-HSA-8986937;R-HSA-9615570;R-HSA-9615554;R-HSA-9615571;R-HSA-8986939;R-HSA-9021183;R-HSA-9021182;R-HSA-9615501
R-HSA-2122947	NOTCH1 Intracellular Domain Regulates Transcription	3	56	0.00400486	0.418642	0.418642	1	16	0.00135731	9606	Homo sapiens	NCOR2;NCOR1;TBL1XR1		R-HSA-1912388
R-HSA-173107	Binding and entry of HIV virion	1	13	0.00093	0.421269	0.421269	8	8	0.000679	9606	Homo sapiens	PPIA		R-HSA-164515;R-HSA-164500;R-HSA-164507;R-HSA-164521;R-HSA-164510;R-HSA-164524;R-HSA-164508;R-HSA-164509
R-HSA-2468052	Establishment of Sister Chromatid Cohesion	1	13	0.00093	0.421269	0.421269	4	4	0.000339	9606	Homo sapiens	WAPAL		R-HSA-2468039;R-HSA-2473152;R-HSA-2473151;R-HSA-2468041
R-HSA-3215018	Processing and activation of SUMO	1	13	0.00093	0.421269	0.421269	6	9	0.000763	9606	Homo sapiens	UBA2		R-HSA-2993790;R-HSA-2993769;R-HSA-2993784;R-HSA-2993781;R-HSA-2993780;R-HSA-2990833
R-HSA-110056	MAPK3 (ERK1) activation	1	13	0.00093	0.421269	0.421269	1	4	0.000339	9606	Homo sapiens	CDK1		R-HSA-112342
R-HSA-1445148	Translocation of SLC2A4 (GLUT4) to the plasma membrane	4	79	0.00564972	0.424725	0.424725	1	15	0.00127248	9606	Homo sapiens	TUBB4B;TUBA4A		R-HSA-2316347
R-HSA-72086	mRNA Capping	2	35	0.00250304	0.432888	0.432888	10	11	0.000933	9606	Homo sapiens	GTF2F1;SUPT5H		R-HSA-77073;R-HSA-77090;R-HSA-77077;R-HSA-77095;R-HSA-77078;R-HSA-77081;R-HSA-77083;R-HSA-77085;R-HSA-77069;R-HSA-77068
R-HSA-421837	Clathrin derived vesicle budding	4	80	0.00572123	0.434004	0.434004	7	19	0.00161181	9606	Homo sapiens	TPD52;SNX9;PUM1;DNM2		R-HSA-421831;R-HSA-432706;R-HSA-432707;R-HSA-421836;R-HSA-434362;R-HSA-421835;R-HSA-421833
R-HSA-199992	trans-Golgi Network Vesicle Budding	4	80	0.00572123	0.434004	0.434004	7	19	0.00161181	9606	Homo sapiens	TPD52;SNX9;PUM1;DNM2		R-HSA-421831;R-HSA-432706;R-HSA-432707;R-HSA-421836;R-HSA-434362;R-HSA-421835;R-HSA-421833
R-HSA-1257604	PIP3 activates AKT signaling	14	312	0.0223128	0.440283	0.440283	33	86	0.00729555	9606	Homo sapiens	PSMD11;CHD3;PSMA7;MTOR;PSMD8;PSMA6;PSMA4;PSMB5;PSMA2;PSMD5;PPP2R1A;AGO2;PSMB1;FYN		R-HSA-8944457;R-HSA-8857925;R-HSA-8944522;R-HSA-2318752;R-HSA-8948621;R-HSA-8948623;R-HSA-8948612;R-HSA-8944454;R-HSA-8948569;R-HSA-8944538;R-HSA-6811504;R-HSA-6811454;R-HSA-8944599;R-HSA-8944104;R-HSA-8948651;R-HSA-8944684;R-HSA-8948524;R-HSA-8945709;R-HSA-8948641;R-HSA-8944483;R-HSA-8943780;R-HSA-8948582;R-HSA-8948583;R-HSA-8944632;R-HSA-8948536;R-HSA-2316434;R-HSA-8944569;R-HSA-8948602;R-HSA-1…
R-HSA-72187	mRNA 3'-end processing	3	58	0.00414789	0.440673	0.440673	3	3	0.000254	9606	Homo sapiens	SRSF2;UPF3B;SRSF11		R-HSA-8849157;R-HSA-72180;R-HSA-72185
R-HSA-202433	Generation of second messenger molecules	3	58	0.00414789	0.440673	0.440673	2	17	0.00144214	9606	Homo sapiens	VASP;ENAH;PAK2		R-HSA-430183;R-HSA-430201
R-HSA-159236	Transport of Mature mRNA derived from an Intron-Containing Transcript	4	81	0.00579275	0.443241	0.443241	4	4	0.000339	9606	Homo sapiens	TPR;SRSF2;UPF3B;SRSF11		R-HSA-75097;R-HSA-75096;R-HSA-75098;R-HSA-159101
R-HSA-5619115	Disorders of transmembrane transporters	11	243	0.0173782	0.444501	0.444501	3	88	0.00746522	9606	Homo sapiens	PSMD8;PSMA6;PSMD11;PSMA4;PSMB5;PSMA2;PSMD5;TPR;PSMB1;SLC1A3;PSMA7		R-HSA-5625015;R-HSA-5661474;R-HSA-8866858
R-HSA-5467337	APC truncation mutants have impaired AXIN binding	1	14	0.00100122	0.445124	0.445124	1	1	8.48e-05	9606	Homo sapiens	PPP2R1A		R-HSA-4791278
R-HSA-5467340	AXIN missense mutants destabilize the destruction complex	1	14	0.00100122	0.445124	0.445124	1	1	8.48e-05	9606	Homo sapiens	PPP2R1A		R-HSA-4839734
R-HSA-5467348	Truncations of AMER1 destabilize the destruction complex	1	14	0.00100122	0.445124	0.445124	1	1	8.48e-05	9606	Homo sapiens	PPP2R1A		R-HSA-4839746
R-HSA-4839744	truncated APC mutants destabilize the destruction complex	1	14	0.00100122	0.445124	0.445124	1	2	0.00017	9606	Homo sapiens	PPP2R1A		R-HSA-4791278
R-HSA-2025928	Calcineurin activates NFAT	1	14	0.00100122	0.445124	0.445124	1	2	0.00017	9606	Homo sapiens	PPIA		R-HSA-2025882
R-HSA-210990	PECAM1 interactions	1	14	0.00100122	0.445124	0.445124	1	7	0.000594	9606	Homo sapiens	FYN		R-HSA-210291
R-HSA-75205	Dissolution of Fibrin Clot	1	14	0.00100122	0.445124	0.445124	1	19	0.00161181	9606	Homo sapiens	SERPINB6		R-HSA-159001
R-HSA-72312	rRNA processing	11	245	0.0175213	0.455082	0.455082	3	21	0.00178147	9606	Homo sapiens	LTV1;TRMT112;RPS25;NOB1;RPS18;RPS3;RPL38;RPS20;RPSA;RPS21;RPS12		R-HSA-6791223;R-HSA-6790982;R-HSA-6791218
R-HSA-162588	Budding and maturation of HIV virion	2	37	0.00264607	0.460945	0.460945	3	3	0.000254	9606	Homo sapiens	PDCD6IP;PPIA		R-HSA-3159232;R-HSA-3159227;R-HSA-3139027
R-HSA-5694530	Cargo concentration in the ER	2	37	0.00264607	0.460945	0.460945	5	12	0.00101798	9606	Homo sapiens	SEC23A;SEC24C		R-HSA-5694436;R-HSA-5694435;R-HSA-5694415;R-HSA-5694413;R-HSA-5694522
R-HSA-4551638	SUMOylation of chromatin organization proteins	3	60	0.00429093	0.462376	0.462376	4	15	0.00127248	9606	Homo sapiens	CBX5;TPR;CHD3		R-HSA-4615987;R-HSA-8956365;R-HSA-4615872;R-HSA-4615933
R-HSA-5358493	Synthesis of diphthamide-EEF2	1	15	0.00107273	0.467996	0.467996	4	4	0.000339	9606	Homo sapiens	EEF2		R-HSA-5358484;R-HSA-5358475;R-HSA-5358494;R-HSA-5367022
R-HSA-5339716	Misspliced GSK3beta mutants stabilize beta-catenin	1	15	0.00107273	0.467996	0.467996	1	1	8.48e-05	9606	Homo sapiens	PPP2R1A		R-HSA-5339713
R-HSA-180689	APOBEC3G mediated resistance to HIV-1 infection	1	15	0.00107273	0.467996	0.467996	2	3	0.000254	9606	Homo sapiens	PPIA		R-HSA-180634;R-HSA-180632
R-HSA-2428933	SHC-related events triggered by IGF1R	1	15	0.00107273	0.467996	0.467996	3	5	0.000424	9606	Homo sapiens	IGF1R		R-HSA-2404193;R-HSA-2404195;R-HSA-5686072
R-HSA-202670	ERKs are inactivated	1	15	0.00107273	0.467996	0.467996	1	2	0.00017	9606	Homo sapiens	PPP2R1A		R-HSA-199959
R-HSA-4839748	AMER1 mutants destabilize the destruction complex	1	15	0.00107273	0.467996	0.467996	1	2	0.00017	9606	Homo sapiens	PPP2R1A		R-HSA-4839746
R-HSA-4839735	AXIN mutants destabilize the destruction complex, activating WNT signaling	1	15	0.00107273	0.467996	0.467996	1	2	0.00017	9606	Homo sapiens	PPP2R1A		R-HSA-4839734
R-HSA-418359	Reduction of cytosolic Ca++ levels	1	15	0.00107273	0.467996	0.467996	1	3	0.000254	9606	Homo sapiens	SRI		R-HSA-425661
R-HSA-168330	Viral RNP Complexes in the Host Cell Nucleus	1	15	0.00107273	0.467996	0.467996	1	3	0.000254	9606	Homo sapiens	HSPA1B		R-HSA-192746
R-HSA-428540	Activation of RAC1	1	15	0.00107273	0.467996	0.467996	1	4	0.000339	9606	Homo sapiens	PAK2		R-HSA-428531
R-HSA-425561	Sodium/Calcium exchangers	1	15	0.00107273	0.467996	0.467996	1	4	0.000339	9606	Homo sapiens	SRI		R-HSA-425661
R-HSA-75035	Chk1/Chk2(Cds1) mediated inactivation of Cyclin B:Cdk1 complex	1	15	0.00107273	0.467996	0.467996	1	5	0.000424	9606	Homo sapiens	CDK1		R-HSA-170070
R-HSA-162592	Integration of provirus	1	15	0.00107273	0.467996	0.467996	2	14	0.00118765	9606	Homo sapiens	PPIA		R-HSA-8951690;R-HSA-173115
R-HSA-8983711	OAS antiviral response	1	15	0.00107273	0.467996	0.467996	2	15	0.00127248	9606	Homo sapiens	ABCE1		R-HSA-8985201;R-HSA-8985123
R-HSA-3108232	SUMO E3 ligases SUMOylate target proteins	8	178	0.0127297	0.473631	0.473631	20	130	0.0110282	9606	Homo sapiens	TFAP2A;NCOR2;CBX5;PARP1;TRIM28;TPR;RPA1;CHD3		R-HSA-5228525;R-HSA-3000399;R-HSA-4551649;R-HSA-5228523;R-HSA-4551616;R-HSA-8956365;R-HSA-4615872;R-HSA-3234081;R-HSA-3000348;R-HSA-4551604;R-HSA-5228508;R-HSA-4615987;R-HSA-3927886;R-HSA-3000411;R-HSA-4570493;R-HSA-4551679;R-HSA-4615933;R-HSA-4655355;R-HSA-4551768;R-HSA-3782535
R-HSA-111465	Apoptotic cleavage of cellular proteins	2	38	0.00271759	0.474666	0.474666	2	38	0.00322362	9606	Homo sapiens	STK26;LMNA		R-HSA-264865;R-HSA-350651
R-HSA-381340	Transcriptional regulation of white adipocyte differentiation	5	108	0.00772366	0.476154	0.476154	12	18	0.00152698	9606	Homo sapiens	NCOR2;MED12;NCOR1;TBL1XR1;MED27		R-HSA-1183058;R-HSA-560472;R-HSA-560473;R-HSA-560491;R-HSA-560493;R-HSA-560510;R-HSA-381309;R-HSA-1183003;R-HSA-560498;R-HSA-1183032;R-HSA-560517;R-HSA-381290
R-HSA-983169	Class I MHC mediated antigen processing & presentation	20	464	0.0331832	0.486694	0.486694	15	48	0.00407194	9606	Homo sapiens	SEC13;SEC23A;PSMD11;ANAPC7;UBR4;LMO7;PSMA7;PSMD8;PSMA6;PSMA4;PSMB5;PSMA2;PSMD5;PSMB1;UBE2N;TPP2;UBA1;UBE2V1;SEC24C		R-HSA-983150;R-HSA-983147;R-HSA-203979;R-HSA-983140;R-HSA-983426;R-HSA-983425;R-HSA-983424;R-HSA-983422;R-HSA-1236935;R-HSA-983162;R-HSA-1236970;R-HSA-983157;R-HSA-983156;R-HSA-983153;R-HSA-983152
R-HSA-1500931	Cell-Cell communication	6	133	0.00951155	0.487396	0.487396	16	60	0.00508992	9606	Homo sapiens	VASP;DST;ILK;FYN;PARVA;ACTN4		R-HSA-446372;R-HSA-373734;R-HSA-446083;R-HSA-432897;R-HSA-451758;R-HSA-451403;R-HSA-446391;R-HSA-532603;R-HSA-446322;R-HSA-373747;R-HSA-8981534;R-HSA-373724;R-HSA-373727;R-HSA-432956;R-HSA-446364;R-HSA-446077
R-HSA-176187	Activation of ATR in response to replication stress	2	39	0.0027891	0.488174	0.488174	6	9	0.000763	9606	Homo sapiens	CDK2;RPA1		R-HSA-176101;R-HSA-176250;R-HSA-176298;R-HSA-176264;R-HSA-176318;R-HSA-176175
R-HSA-4791275	Signaling by WNT in cancer	2	39	0.0027891	0.488174	0.488174	9	16	0.00135731	9606	Homo sapiens	CTBP2;PPP2R1A		R-HSA-5339713;R-HSA-4827388;R-HSA-5334052;R-HSA-4791278;R-HSA-4839635;R-HSA-4839746;R-HSA-4839634;R-HSA-4839734;R-HSA-4839638
R-HSA-6804758	Regulation of TP53 Activity through Acetylation	2	39	0.0027891	0.488174	0.488174	4	14	0.00118765	9606	Homo sapiens	BRPF1;CHD3		R-HSA-6805638;R-HSA-6805620;R-HSA-6805650;R-HSA-6805640
R-HSA-168638	NOD1/2 Signaling Pathway	2	39	0.0027891	0.488174	0.488174	3	17	0.00144214	9606	Homo sapiens	UBE2N;UBE2V1		R-HSA-741386;R-HSA-688137;R-HSA-168184
R-HSA-2173796	SMAD2/SMAD3:SMAD4 heterotrimer regulates transcription	2	39	0.0027891	0.488174	0.488174	1	17	0.00144214	9606	Homo sapiens	CDK9;CCNT1		R-HSA-2176475
R-HSA-1655829	Regulation of cholesterol biosynthesis by SREBP (SREBF)	4	86	0.00615032	0.488665	0.488665	6	52	0.00441127	9606	Homo sapiens	SEC23A;FEN1;TBL1XR1;SEC24C		R-HSA-1655848;R-HSA-1655835;R-HSA-1655850;R-HSA-1655834;R-HSA-1655825;R-HSA-1655826
R-HSA-4839743	phosphorylation site mutants of CTNNB1 are not targeted to the proteasome by the destruction complex	1	16	0.00114425	0.489927	0.489927	4	4	0.000339	9606	Homo sapiens	PPP2R1A		R-HSA-4827388;R-HSA-4839635;R-HSA-4839634;R-HSA-4839638
R-HSA-3000484	Scavenging by Class F Receptors	1	16	0.00114425	0.489927	0.489927	2	2	0.00017	9606	Homo sapiens	HSP90AA1		R-HSA-2247514;R-HSA-2197645
R-HSA-5358752	T41 mutants of beta-catenin aren't phosphorylated	1	16	0.00114425	0.489927	0.489927	1	1	8.48e-05	9606	Homo sapiens	PPP2R1A		R-HSA-4839638
R-HSA-5358747	S33 mutants of beta-catenin aren't phosphorylated	1	16	0.00114425	0.489927	0.489927	1	1	8.48e-05	9606	Homo sapiens	PPP2R1A		R-HSA-4839634
R-HSA-5358751	S45 mutants of beta-catenin aren't phosphorylated	1	16	0.00114425	0.489927	0.489927	1	1	8.48e-05	9606	Homo sapiens	PPP2R1A		R-HSA-4827388
R-HSA-5358749	S37 mutants of beta-catenin aren't phosphorylated	1	16	0.00114425	0.489927	0.489927	1	1	8.48e-05	9606	Homo sapiens	PPP2R1A		R-HSA-4839635
R-HSA-169893	Prolonged ERK activation events	1	16	0.00114425	0.489927	0.489927	6	12	0.00101798	9606	Homo sapiens	KIDINS220		R-HSA-169891;R-HSA-169904;R-HSA-169905;R-HSA-169895;R-HSA-9612980;R-HSA-169901
R-HSA-879415	Advanced glycosylation endproduct receptor signaling	1	16	0.00114425	0.489927	0.489927	2	4	0.000339	9606	Homo sapiens	HMGB1		R-HSA-879411;R-HSA-879362
R-HSA-75892	Platelet Adhesion to exposed collagen	1	16	0.00114425	0.489927	0.489927	2	6	0.000509	9606	Homo sapiens	FYN		R-HSA-114577;R-HSA-432295
R-HSA-4641265	Repression of WNT target genes	1	16	0.00114425	0.489927	0.489927	2	7	0.000594	9606	Homo sapiens	CTBP2		R-HSA-5334050;R-HSA-5229348
R-HSA-3214847	HATs acetylate histones	5	110	0.00786669	0.492023	0.492023	4	15	0.00127248	9606	Homo sapiens	MORF4L1;BRPF1;MORF4L2;HAT1;OGT		R-HSA-3318486;R-HSA-3321975;R-HSA-3662318;R-HSA-3321805
R-HSA-5654738	Signaling by FGFR2	4	87	0.00622184	0.497571	0.497571	11	46	0.00390227	9606	Homo sapiens	TIA1;PPP2R1A;GTF2F1		R-HSA-6803527;R-HSA-934559;R-HSA-1295632;R-HSA-6803523;R-HSA-1295622;R-HSA-6803838;R-HSA-1295609;R-HSA-1549564;R-HSA-6803836;R-HSA-1295599;R-HSA-1295613
R-HSA-74160	Gene expression (Transcription)	74	1751	0.125223	0.50031	0.50031	195	898	0.0761792	9606	Homo sapiens	GPI;CCNT1;ICE1;ICE2;GTF2B;ARID4B;PHAX;CHD3;CDC73;PSMD8;MED12;TRIM28;PSMD5;PPP2R1A;TNKS1BP1;NELFCD;PRKACA;TEAD1;CAST;PRMT5;SMARCC1;SUPT16H;HSP90AA1;PARP1;GTF2F1;MED27;ARID1B;TSN;DDB2;NCOR2;PSMA6;NCOR1;PSMA4;TBL1XR1;PSMA2;SRSF2;SMARCD1;PSMD11;TXN;PSMA7;PRDX2;PSMB5;ASUN;PRDX1;TPR;PSMB1;DROSHA;RPRD1A;ZKSCAN1;SRSF11;TFAP2A;SURF1;CBX5;SSB;BRPF1;TXNRD1;RPA1;UPF3B;SSRP1;SUPT5H;MTOR;CDK9;CDK2;AGO2;DRG1;CD…		R-HSA-73739;R-HSA-9009282;R-HSA-8864395;R-HSA-8936068;R-HSA-5601883;R-HSA-433672;R-HSA-6805109;R-HSA-6805620;R-HSA-6810238;R-HSA-8864412;R-HSA-73757;R-HSA-6810235;R-HSA-2187325;R-HSA-187934;R-HSA-6810234;R-HSA-6810233;R-HSA-426520;R-HSA-73758;R-HSA-9615501;R-HSA-8869543;R-HSA-8869542;R-HSA-6805061;R-HSA-9613494;R-HSA-6805059;R-HSA-73769;R-HSA-8864431;R-HSA-8869549;R-HSA-9613497;R-HSA-3341343;R-HS…
R-HSA-390522	Striated Muscle Contraction	2	40	0.00286062	0.501463	0.501463	4	4	0.000339	9606	Homo sapiens	ACTC1;TPM4		R-HSA-390597;R-HSA-390598;R-HSA-390593;R-HSA-390595
R-HSA-3301854	Nuclear Pore Complex (NPC) Disassembly	2	40	0.00286062	0.501463	0.501463	2	2	0.00017	9606	Homo sapiens	TPR;CDK1		R-HSA-2990880;R-HSA-2990882
R-HSA-5578775	Ion homeostasis	3	64	0.00457699	0.504623	0.504623	7	15	0.00127248	9606	Homo sapiens	AHCYL1;SRI;PRKACA		R-HSA-427910;R-HSA-169683;R-HSA-5226904;R-HSA-2855020;R-HSA-425661;R-HSA-5617182;R-HSA-5617179
R-HSA-174490	Membrane binding and targetting of GAG proteins	1	17	0.00121576	0.510956	0.510956	1	4	0.000339	9606	Homo sapiens	NMT1		R-HSA-184392
R-HSA-73928	Depyrimidination	1	17	0.00121576	0.510956	0.510956	8	34	0.00288429	9606	Homo sapiens	NTHL1		R-HSA-110224;R-HSA-110208;R-HSA-110227;R-HSA-110211;R-HSA-110226;R-HSA-110229;R-HSA-110213;R-HSA-110212
R-HSA-110329	Cleavage of the damaged pyrimidine	1	17	0.00121576	0.510956	0.510956	4	17	0.00144214	9606	Homo sapiens	NTHL1		R-HSA-110224;R-HSA-110227;R-HSA-110226;R-HSA-110229
R-HSA-162658	Golgi Cisternae Pericentriolar Stack Reorganization	1	17	0.00121576	0.510956	0.510956	1	6	0.000509	9606	Homo sapiens	CDK1		R-HSA-2172183
R-HSA-203765	eNOS activation and regulation	2	41	0.00293213	0.514527	0.514527	11	26	0.00220563	9606	Homo sapiens	HSP90AA1;DNM2		R-HSA-202129;R-HSA-1497796;R-HSA-202144;R-HSA-1497810;R-HSA-203625;R-HSA-202137;R-HSA-202111;R-HSA-202127;R-HSA-203662;R-HSA-203565;R-HSA-1497784
R-HSA-202131	Metabolism of nitric oxide	2	41	0.00293213	0.514527	0.514527	11	26	0.00220563	9606	Homo sapiens	HSP90AA1;DNM2		R-HSA-202129;R-HSA-1497796;R-HSA-202144;R-HSA-1497810;R-HSA-203625;R-HSA-202137;R-HSA-202111;R-HSA-202127;R-HSA-203662;R-HSA-203565;R-HSA-1497784
R-HSA-6791312	TP53 Regulates Transcription of Cell Cycle Genes	3	65	0.0046485	0.514917	0.514917	4	42	0.00356295	9606	Homo sapiens	CDK2;CDK1;TNKS1BP1		R-HSA-6803875;R-HSA-6798044;R-HSA-69562;R-HSA-187934
R-HSA-72202	Transport of Mature Transcript to Cytoplasm	4	90	0.00643639	0.523879	0.523879	13	13	0.00110282	9606	Homo sapiens	TPR;SRSF2;UPF3B;SRSF11		R-HSA-159046;R-HSA-159050;R-HSA-158441;R-HSA-158447;R-HSA-111439;R-HSA-77587;R-HSA-158481;R-HSA-158484;R-HSA-75097;R-HSA-75096;R-HSA-75098;R-HSA-77594;R-HSA-159101
R-HSA-163560	Triglyceride catabolism	2	42	0.00300365	0.527362	0.527362	2	17	0.00144214	9606	Homo sapiens	PRKACA		R-HSA-163418;R-HSA-163416
R-HSA-211000	Gene Silencing by RNA	5	115	0.00822427	0.530876	0.530876	17	36	0.00305395	9606	Homo sapiens	HSP90AA1;AGO2;TPR;DROSHA;TSN		R-HSA-5578965;R-HSA-9023912;R-HSA-2106625;R-HSA-5578966;R-HSA-5578742;R-HSA-426464;R-HSA-9023909;R-HSA-5578744;R-HSA-5578712;R-HSA-5601883;R-HSA-203862;R-HSA-203893;R-HSA-210805;R-HSA-2106614;R-HSA-2106615;R-HSA-426520;R-HSA-426489
R-HSA-399956	CRMPs in Sema3A signaling	1	18	0.00128728	0.531119	0.531119	5	5	0.000424	9606	Homo sapiens	FYN		R-HSA-399951;R-HSA-399946;R-HSA-399947;R-HSA-399931;R-HSA-399944
R-HSA-2032785	YAP1- and WWTR1 (TAZ)-stimulated gene expression	1	18	0.00128728	0.531119	0.531119	3	9	0.000763	9606	Homo sapiens	TEAD1		R-HSA-2032781;R-HSA-1989766;R-HSA-2032775
R-HSA-9018681	Biosynthesis of protectins	1	18	0.00128728	0.531119	0.531119	2	6	0.000509	9606	Homo sapiens	LTA4H		R-HSA-9024890;R-HSA-9020257
R-HSA-177504	Retrograde neurotrophin signalling	1	18	0.00128728	0.531119	0.531119	1	3	0.000254	9606	Homo sapiens	DNM2		R-HSA-177501
R-HSA-174495	Synthesis And Processing Of GAG, GAGPOL Polyproteins	1	18	0.00128728	0.531119	0.531119	1	5	0.000424	9606	Homo sapiens	NMT1		R-HSA-184392
R-HSA-5607763	CLEC7A (Dectin-1) induces NFAT activation	1	18	0.00128728	0.531119	0.531119	1	6	0.000509	9606	Homo sapiens	AHCYL1		R-HSA-169683
R-HSA-9023661	Biosynthesis of E-series 18(R)-resolvins	1	18	0.00128728	0.531119	0.531119	1	7	0.000594	9606	Homo sapiens	LTA4H		R-HSA-9018877
R-HSA-435354	Zinc transporters	1	18	0.00128728	0.531119	0.531119	1	13	0.00110282	9606	Homo sapiens	SLC39A10		R-HSA-442345
R-HSA-73856	RNA Polymerase II Transcription Termination	3	67	0.00479153	0.535154	0.535154	1	4	0.000339	9606	Homo sapiens	SRSF2;UPF3B;SRSF11		R-HSA-72180
R-HSA-109688	Cleavage of Growing Transcript in the Termination Region	3	67	0.00479153	0.535154	0.535154	1	4	0.000339	9606	Homo sapiens	SRSF2;UPF3B;SRSF11		R-HSA-72180
R-HSA-8982491	Glycogen metabolism	2	43	0.00307516	0.539966	0.539966	2	37	0.00313878	9606	Homo sapiens	PGM1		R-HSA-70272;R-HSA-70427
R-HSA-1500620	Meiosis	4	92	0.00657942	0.541045	0.541045	5	15	0.00127248	9606	Homo sapiens	CDK2;LMNA;RPA1;TPP1		R-HSA-912429;R-HSA-912408;R-HSA-912458;R-HSA-912503;R-HSA-912496
R-HSA-1280215	Cytokine Signaling in Immune system	44	1055	0.0754488	0.545003	0.545003	36	639	0.0542077	9606	Homo sapiens	LAMA5;EIF4A1;PSMD11;HMGB1;PSMA7;PSMD8;PSMB5;PSMD5;PPP2R1A;TPR;CFL1;PSMB1;FYN;PRKACA;PAK2;HSP90AA1;ANXA1;GSTO1;TALDO1;MSN;MIF;PSMA6;PSMA4;PSMA2;TCP1;FSCN1;UBE2N;UBE2V1;ABCE1;PPIA;EIF4G2;EIF4G1		R-HSA-6785895;R-HSA-8950218;R-HSA-8950732;R-HSA-5223305;R-HSA-450187;R-HSA-199959;R-HSA-5668481;R-HSA-8948063;R-HSA-8950367;R-HSA-8950175;R-HSA-446877;R-HSA-451418;R-HSA-879917;R-HSA-1678842;R-HSA-168166;R-HSA-209061;R-HSA-5607731;R-HSA-913451;R-HSA-8950190;R-HSA-8948015;R-HSA-450337;R-HSA-8948066;R-HSA-8985123;R-HSA-1176059;R-HSA-1169402;R-HSA-450346;R-HSA-8950328;R-HSA-8950718;R-HSA-912629;R-HS…
R-HSA-6784531	tRNA processing in the nucleus	3	68	0.00486305	0.545092	0.545092	3	7	0.000594	9606	Homo sapiens	TPR;FAM98B;TRNT1		R-HSA-5696807;R-HSA-5696816;R-HSA-6783483
R-HSA-2644606	Constitutive Signaling by NOTCH1 PEST Domain Mutants	3	68	0.00486305	0.545092	0.545092	1	21	0.00178147	9606	Homo sapiens	NCOR2;NCOR1;TBL1XR1		R-HSA-2220982
R-HSA-2894858	Signaling by NOTCH1 HD+PEST Domain Mutants in Cancer	3	68	0.00486305	0.545092	0.545092	1	21	0.00178147	9606	Homo sapiens	NCOR2;NCOR1;TBL1XR1		R-HSA-2220982
R-HSA-2644602	Signaling by NOTCH1 PEST Domain Mutants in Cancer	3	68	0.00486305	0.545092	0.545092	1	21	0.00178147	9606	Homo sapiens	NCOR2;NCOR1;TBL1XR1		R-HSA-2220982
R-HSA-2894862	Constitutive Signaling by NOTCH1 HD+PEST Domain Mutants	3	68	0.00486305	0.545092	0.545092	1	21	0.00178147	9606	Homo sapiens	NCOR2;NCOR1;TBL1XR1		R-HSA-2220982
R-HSA-2644603	Signaling by NOTCH1 in Cancer	3	68	0.00486305	0.545092	0.545092	1	39	0.00330845	9606	Homo sapiens	NCOR2;NCOR1;TBL1XR1		R-HSA-2220982
R-HSA-8948700	Competing endogenous RNAs (ceRNAs) regulate PTEN translation	1	19	0.00135879	0.550452	0.550452	11	11	0.000933	9606	Homo sapiens	AGO2		R-HSA-8948536;R-HSA-8948602;R-HSA-8948651;R-HSA-8948524;R-HSA-8948621;R-HSA-8948623;R-HSA-8948641;R-HSA-8948594;R-HSA-8948612;R-HSA-8948582;R-HSA-8948583
R-HSA-196299	Beta-catenin phosphorylation cascade	1	19	0.00135879	0.550452	0.550452	4	4	0.000339	9606	Homo sapiens	PPP2R1A		R-HSA-195283;R-HSA-195318;R-HSA-195287;R-HSA-195300
R-HSA-110312	Translesion synthesis by REV1	1	19	0.00135879	0.550452	0.550452	4	5	0.000424	9606	Homo sapiens	RPA1		R-HSA-5652151;R-HSA-110307;R-HSA-110308;R-HSA-110311
R-HSA-1295596	Spry regulation of FGF signaling	1	19	0.00135879	0.550452	0.550452	7	11	0.000933	9606	Homo sapiens	PPP2R1A		R-HSA-934559;R-HSA-1295632;R-HSA-1295622;R-HSA-1295609;R-HSA-1549564;R-HSA-1295599;R-HSA-1295613
R-HSA-6785631	ERBB2 Regulates Cell Motility	1	19	0.00135879	0.550452	0.550452	1	2	0.00017	9606	Homo sapiens	DIAPH1		R-HSA-6785648
R-HSA-5676934	Protein repair	1	19	0.00135879	0.550452	0.550452	2	7	0.000594	9606	Homo sapiens	TXN		R-HSA-5676917;R-HSA-5676940
R-HSA-399997	Acetylcholine regulates insulin secretion	1	19	0.00135879	0.550452	0.550452	2	7	0.000594	9606	Homo sapiens	PRKACA		R-HSA-400015;R-HSA-399978
R-HSA-196780	Biotin transport and metabolism	1	19	0.00135879	0.550452	0.550452	3	13	0.00110282	9606	Homo sapiens	PC		R-HSA-3323111;R-HSA-2993802;R-HSA-3065959
R-HSA-3270619	IRF3-mediated induction of type I IFN	1	19	0.00135879	0.550452	0.550452	1	5	0.000424	9606	Homo sapiens	TREX1		R-HSA-1834939
R-HSA-450385	Butyrate Response Factor 1 (BRF1) binds and destabilizes mRNA	1	19	0.00135879	0.550452	0.550452	1	6	0.000509	9606	Homo sapiens	DCP1A		R-HSA-450488
R-HSA-8876725	Protein methylation	1	19	0.00135879	0.550452	0.550452	1	9	0.000763	9606	Homo sapiens	EEF2		R-HSA-8932243
R-HSA-3899300	SUMOylation of transcription cofactors	2	44	0.00314668	0.552336	0.552336	2	27	0.00229047	9606	Homo sapiens	NCOR2;TRIM28		R-HSA-3927886;R-HSA-3782535
R-HSA-418346	Platelet homeostasis	5	118	0.00843882	0.553539	0.553539	5	30	0.00254496	9606	Homo sapiens	PPP2R1A;GNAS;GNB4;SRI		R-HSA-392852;R-HSA-392870;R-HSA-432143;R-HSA-425661;R-HSA-392874
R-HSA-5693532	DNA Double-Strand Break Repair	7	167	0.0119431	0.554553	0.554553	38	107	0.00907703	9606	Homo sapiens	FEN1;PARP1;POLD1;CDK2;POLE3;RPA1;UBE2N		R-HSA-5684887;R-HSA-5683735;R-HSA-69891;R-HSA-5684052;R-HSA-5684882;R-HSA-5685011;R-HSA-5693599;R-HSA-5686685;R-HSA-5687640;R-HSA-5693593;R-HSA-5683801;R-HSA-5682629;R-HSA-5683077;R-HSA-5684096;R-HSA-5686657;R-HSA-5687758;R-HSA-5693580;R-HSA-5683405;R-HSA-5684875;R-HSA-5686900;R-HSA-5686642;R-HSA-5686704;R-HSA-5687664;R-HSA-5684081;R-HSA-5693566;R-HSA-5693564;R-HSA-5687484;R-HSA-5683384;R-HSA-569…
R-HSA-397014	Muscle contraction	10	240	0.0171637	0.554731	0.554731	17	39	0.00330845	9606	Homo sapiens	ACTC1;AHCYL1;ANXA1;TPM4;CALD1;CAD;SRI;TLN1;PRKACA;PAK2;VCL		R-HSA-390597;R-HSA-427910;R-HSA-445700;R-HSA-390598;R-HSA-445797;R-HSA-390593;R-HSA-445699;R-HSA-390595;R-HSA-2855020;R-HSA-5617182;R-HSA-445704;R-HSA-5617179;R-HSA-445705;R-HSA-169683;R-HSA-5226904;R-HSA-425661;R-HSA-5263628
R-HSA-163841	Gamma carboxylation, hypusine formation and arylsulfatase activation	3	69	0.00493456	0.554905	0.554905	7	39	0.00330845	9606	Homo sapiens	EIF5A;EEF2		R-HSA-204647;R-HSA-5358484;R-HSA-204662;R-HSA-5358475;R-HSA-204617;R-HSA-5358494;R-HSA-5367022
R-HSA-450294	MAP kinase activation	3	69	0.00493456	0.554905	0.554905	3	32	0.00271463	9606	Homo sapiens	PPP2R1A;UBE2N;UBE2V1		R-HSA-199959;R-HSA-450337;R-HSA-450346
R-HSA-446728	Cell junction organization	4	94	0.00672245	0.55789	0.55789	8	37	0.00313878	9606	Homo sapiens	VASP;DST;ILK;PARVA		R-HSA-446391;R-HSA-446372;R-HSA-446322;R-HSA-446083;R-HSA-432897;R-HSA-432956;R-HSA-446364;R-HSA-446077
R-HSA-975871	MyD88 cascade initiated on plasma membrane	4	94	0.00672245	0.55789	0.55789	6	57	0.00483543	9606	Homo sapiens	PPP2R1A;UBE2N;HMGB1;UBE2V1		R-HSA-199959;R-HSA-937050;R-HSA-168166;R-HSA-450337;R-HSA-168184;R-HSA-450346
R-HSA-168176	Toll Like Receptor 5 (TLR5) Cascade	4	94	0.00672245	0.55789	0.55789	6	58	0.00492026	9606	Homo sapiens	PPP2R1A;UBE2N;HMGB1;UBE2V1		R-HSA-199959;R-HSA-937050;R-HSA-168166;R-HSA-450337;R-HSA-168184;R-HSA-450346
R-HSA-168142	Toll Like Receptor 10 (TLR10) Cascade	4	94	0.00672245	0.55789	0.55789	6	58	0.00492026	9606	Homo sapiens	PPP2R1A;UBE2N;HMGB1;UBE2V1		R-HSA-199959;R-HSA-937050;R-HSA-168166;R-HSA-450337;R-HSA-168184;R-HSA-450346
R-HSA-8875878	MET promotes cell motility	2	45	0.00321819	0.564468	0.564468	1	12	0.00101798	9606	Homo sapiens	LAMA5;LAMC1		R-HSA-8874079
R-HSA-597592	Post-translational protein modification	66	1591	0.113781	0.565909	0.565909	138	521	0.0441975	9606	Homo sapiens	LAMC1;CHD3;CDC73;PSMD8;TFG;TRIM28;PSMD5;PPP6R3;DAG1;EIF5A;SEC13;PARP1;USP5;LMO7;UCHL5;TUBA4A;RNF40;DDB2;NCOR2;PTP4A2;PSMA6;PSMA4;PSMA2;TTLL12;COPA;SEC23A;PSMD11;DCTN2;DCTN1;USP10;NEDD8;FSTL1;PSMA7;CAND1;PSMB5;COMMD9;TPR;PSMB1;CD55;TFAP2A;DYNC1H1;CBX5;GALNT1;SEC16A;RPA1;TUBB4B;EEF2;KTN1;ARCN1;COPS4;CUL4A;COPS2;UBE2N;CDK1;UBA2;UBA1;ANP32B;COPG1;OGT;SEC24C;COPE;RAD18		R-HSA-8956040;R-HSA-8956045;R-HSA-913675;R-HSA-3234081;R-HSA-8955289;R-HSA-8943003;R-HSA-8943007;R-HSA-8852127;R-HSA-5665871;R-HSA-8956050;R-HSA-8932243;R-HSA-8955285;R-HSA-4551768;R-HSA-8852134;R-HSA-6807877;R-HSA-8852133;R-HSA-5689973;R-HSA-8852132;R-HSA-6807875;R-HSA-8852131;R-HSA-8852130;R-HSA-8852129;R-HSA-6807872;R-HSA-8852128;R-HSA-8852136;R-HSA-3000348;R-HSA-6781779;R-HSA-4570493;R-HSA-56…
R-HSA-6804756	Regulation of TP53 Activity through Phosphorylation	4	95	0.00679396	0.566187	0.566187	4	26	0.00220563	9606	Homo sapiens	SUPT16H;CDK2;RPA1;SSRP1		R-HSA-6805061;R-HSA-6805109;R-HSA-6799332;R-HSA-6805059
R-HSA-450604	KSRP (KHSRP) binds and destabilizes mRNA	1	20	0.00143031	0.56899	0.56899	5	5	0.000424	9606	Homo sapiens	KHSRP		R-HSA-450422;R-HSA-450499;R-HSA-451152;R-HSA-450592;R-HSA-450620
R-HSA-5656121	Translesion synthesis by POLI	1	20	0.00143031	0.56899	0.56899	3	3	0.000254	9606	Homo sapiens	RPA1		R-HSA-5656148;R-HSA-5656158;R-HSA-5656105
R-HSA-354194	GRB2:SOS provides linkage to MAPK signaling for Integrins	1	20	0.00143031	0.56899	0.56899	2	2	0.00017	9606	Homo sapiens	TLN1		R-HSA-354165;R-HSA-354087
R-HSA-5099900	WNT5A-dependent internalization of FZD4	1	20	0.00143031	0.56899	0.56899	1	5	0.000424	9606	Homo sapiens	PRKACA		R-HSA-5138432
R-HSA-196836	Vitamin C (ascorbate) metabolism	1	20	0.00143031	0.56899	0.56899	1	5	0.000424	9606	Homo sapiens	GSTO1		R-HSA-198813
R-HSA-388844	Receptor-type tyrosine-protein phosphatases	1	20	0.00143031	0.56899	0.56899	1	6	0.000509	9606	Homo sapiens	PPFIBP1		R-HSA-388824
R-HSA-6804116	TP53 Regulates Transcription of Genes Involved in G1 Cell Cycle Arrest	1	20	0.00143031	0.56899	0.56899	2	17	0.00144214	9606	Homo sapiens	CDK2		R-HSA-69562;R-HSA-187934
R-HSA-3232118	SUMOylation of transcription factors	1	20	0.00143031	0.56899	0.56899	1	11	0.000933	9606	Homo sapiens	TFAP2A		R-HSA-3234081
R-HSA-73857	RNA Polymerase II Transcription	66	1593	0.113924	0.570192	0.570192	159	787	0.0667628	9606	Homo sapiens	GPI;CCNT1;ICE1;ICE2;GTF2B;PHAX;CHD3;CDC73;PSMD8;MED12;TRIM28;PSMD5;PPP2R1A;TNKS1BP1;NELFCD;PRKACA;TEAD1;PRMT5;SMARCC1;SUPT16H;PARP1;GTF2F1;MED27;ARID1B;DDB2;NCOR2;PSMA6;NCOR1;PSMA4;TBL1XR1;PSMA2;SRSF2;SMARCD1;PSMD11;TXN;PSMA7;PRDX2;PSMB5;ASUN;PRDX1;PSMB1;RPRD1A;ZKSCAN1;SRSF11;TFAP2A;SURF1;CBX5;BRPF1;TXNRD1;RPA1;UPF3B;SSRP1;SUPT5H;MTOR;CDK9;CDK2;AGO2;DRG1;CDK1;TCEA1		R-HSA-112385;R-HSA-113409;R-HSA-113411;R-HSA-113413;R-HSA-113412;R-HSA-113414;R-HSA-8951695;R-HSA-112392;R-HSA-112395;R-HSA-9009282;R-HSA-8864395;R-HSA-77069;R-HSA-8936068;R-HSA-112396;R-HSA-77068;R-HSA-77071;R-HSA-3234081;R-HSA-77073;R-HSA-6805109;R-HSA-6805620;R-HSA-113429;R-HSA-113430;R-HSA-6810238;R-HSA-8864412;R-HSA-6810235;R-HSA-2187325;R-HSA-187934;R-HSA-6810234;R-HSA-6810233;R-HSA-9615501…
R-HSA-8953750	Transcriptional Regulation by E2F6	2	46	0.00328971	0.576363	0.576363	2	33	0.00279946	9606	Homo sapiens	CBX5		R-HSA-9007647;R-HSA-9007646
R-HSA-388841	Costimulation by the CD28 family	4	97	0.00693699	0.58252	0.58252	16	34	0.00288429	9606	Homo sapiens	PPP2R1A;FYN;PAK2;MTOR		R-HSA-389381;R-HSA-389348;R-HSA-389158;R-HSA-389350;R-HSA-388833;R-HSA-388832;R-HSA-388814;R-HSA-388809;R-HSA-389352;R-HSA-389354;R-HSA-198640;R-HSA-388829;R-HSA-389532;R-HSA-389788;R-HSA-388831;R-HSA-390329
R-HSA-5685942	HDR through Homologous Recombination (HRR)	3	72	0.00514911	0.583571	0.583571	2	19	0.00161181	9606	Homo sapiens	POLD1;POLE3;RPA1		R-HSA-5693593;R-HSA-5693561
R-HSA-5655862	Translesion synthesis by POLK	1	21	0.00150182	0.586764	0.586764	3	3	0.000254	9606	Homo sapiens	RPA1		R-HSA-5655892;R-HSA-5655965;R-HSA-5655835
R-HSA-8866910	TFAP2 (AP-2) family regulates transcription of growth factors and their receptors	1	21	0.00150182	0.586764	0.586764	14	18	0.00152698	9606	Homo sapiens	TFAP2A		R-HSA-8864999;R-HSA-8864453;R-HSA-8864737;R-HSA-8864431;R-HSA-8864395;R-HSA-8864426;R-HSA-8864936;R-HSA-8864466;R-HSA-8864690;R-HSA-8864433;R-HSA-8864381;R-HSA-8864989;R-HSA-8864412;R-HSA-8864698
R-HSA-176407	Conversion from APC/C:Cdc20 to APC/C:Cdh1 in late anaphase	1	21	0.00150182	0.586764	0.586764	2	3	0.000254	9606	Homo sapiens	ANAPC7		R-HSA-174224;R-HSA-174070
R-HSA-3134975	Regulation of innate immune responses to cytosolic DNA	1	21	0.00150182	0.586764	0.586764	2	9	0.000763	9606	Homo sapiens	TREX1		R-HSA-3245943;R-HSA-3244605
R-HSA-5661270	Formation of xylulose-5-phosphate	1	21	0.00150182	0.586764	0.586764	1	6	0.000509	9606	Homo sapiens	SORD		R-HSA-5662471
R-HSA-6804114	TP53 Regulates Transcription of Genes Involved in G2 Cell Cycle Arrest	1	21	0.00150182	0.586764	0.586764	1	11	0.000933	9606	Homo sapiens	CDK1		R-HSA-6803875
R-HSA-73779	RNA Polymerase II Transcription Pre-Initiation And Promoter Opening	2	47	0.00336122	0.588019	0.588019	4	5	0.000424	9606	Homo sapiens	GTF2B;GTF2F1		R-HSA-109637;R-HSA-109639;R-HSA-75095;R-HSA-109638
R-HSA-379726	Mitochondrial tRNA aminoacylation	2	47	0.00336122	0.588019	0.588019	2	21	0.00178147	9606	Homo sapiens	KARS;QARS		R-HSA-380241;R-HSA-380233
R-HSA-5693567	HDR through Homologous Recombination (HRR) or Single Strand Annealing (SSA)	5	124	0.00886791	0.597183	0.597183	17	42	0.00356295	9606	Homo sapiens	POLD1;CDK2;POLE3;RPA1;UBE2N		R-HSA-5684887;R-HSA-5684052;R-HSA-5686642;R-HSA-5684882;R-HSA-5685011;R-HSA-5684081;R-HSA-5693564;R-HSA-5693593;R-HSA-5693561;R-HSA-5693542;R-HSA-5684071;R-HSA-5685156;R-HSA-5684096;R-HSA-5686657;R-HSA-5687758;R-HSA-5693580;R-HSA-5684875
R-HSA-9006934	Signaling by Receptor Tyrosine Kinases	21	518	0.037045	0.598112	0.598112	103	631	0.053529	9606	Homo sapiens	LAMA5;TIA1;HSP90AA1;AHCYL1;KIDINS220;PTPRJ;LAMC1;GTF2F1;MTOR;DNM2;IGF1R;DIAPH1;NCOR1;PPP2R1A;FYN;PRKACA;PAK2		R-HSA-1295632;R-HSA-205319;R-HSA-1562641;R-HSA-9032582;R-HSA-9032601;R-HSA-199959;R-HSA-1295622;R-HSA-6785648;R-HSA-6803838;R-HSA-6803836;R-HSA-5218643;R-HSA-6803527;R-HSA-6803523;R-HSA-9612980;R-HSA-2428930;R-HSA-1470012;R-HSA-1470010;R-HSA-1470009;R-HSA-1433428;R-HSA-5218828;R-HSA-2404199;R-HSA-5218826;R-HSA-2404193;R-HSA-5218824;R-HSA-2404195;R-HSA-5218823;R-HSA-5218822;R-HSA-5218821;R-HSA-240…
R-HSA-373080	Class B/2 (Secretin family receptors)	4	99	0.00708003	0.598493	0.598493	2	20	0.00169664	9606	Homo sapiens	GNAS;GNB4;CD55		R-HSA-879674;R-HSA-381612
R-HSA-6811438	Intra-Golgi traffic	2	48	0.00343274	0.599435	0.599435	3	10	0.000848	9606	Homo sapiens	ALPP;GOLIM4		R-HSA-8847635;R-HSA-8847875;R-HSA-8847544
R-HSA-438064	Post NMDA receptor activation events	2	48	0.00343274	0.599435	0.599435	1	19	0.00161181	9606	Homo sapiens	PRKACA		R-HSA-111919
R-HSA-372708	p130Cas linkage to MAPK signaling for integrins	1	22	0.00157334	0.603806	0.603806	3	3	0.000254	9606	Homo sapiens	TLN1		R-HSA-372693;R-HSA-372705;R-HSA-372697
R-HSA-9020265	Biosynthesis of aspirin-triggered D-series resolvins	1	22	0.00157334	0.603806	0.603806	2	10	0.000848	9606	Homo sapiens	LTA4H		R-HSA-9020252;R-HSA-9020270
R-HSA-2408550	Metabolism of ingested H2SeO4 and H2SeO3 into H2Se	1	22	0.00157334	0.603806	0.603806	1	7	0.000594	9606	Homo sapiens	TXNRD1		R-HSA-2408558
R-HSA-109582	Hemostasis	33	812	0.0580705	0.604903	0.604903	69	327	0.0277401	9606	Homo sapiens	WDR1;SRI;KIF11;KLC1;PPP2R1A;KIF5B;CFL1;FYN;PRKACA;PRPF38B;CBX5;ANXA5;MIF;ACTN4;TUBB4B;TUBA4A;SERPINB6;KIF2A;CDK2;GNAS;GNB4;TAGLN2;ALDOA;TLN1;PFN1;PPIA;VCL		R-HSA-443910;R-HSA-392195;R-HSA-443905;R-HSA-429441;R-HSA-432143;R-HSA-396941;R-HSA-397835;R-HSA-392202;R-HSA-114577;R-HSA-392852;R-HSA-984606;R-HSA-984733;R-HSA-418581;R-HSA-983194;R-HSA-418579;R-HSA-990489;R-HSA-418576;R-HSA-354066;R-HSA-354077;R-HSA-159001;R-HSA-354073;R-HSA-432295;R-HSA-354087;R-HSA-392870;R-HSA-377644;R-HSA-114600;R-HSA-377641;R-HSA-377640;R-HSA-377643;R-HSA-392874;R-HSA-567…
R-HSA-5423646	Aflatoxin activation and detoxification	2	49	0.00350425	0.610611	0.610611	2	17	0.00144214	9606	Homo sapiens	CPS1;MGST3		R-HSA-5433074;R-HSA-5423653
R-HSA-2682334	EPH-Ephrin signaling	4	101	0.00722306	0.614095	0.614095	48	56	0.00475059	9606	Homo sapiens	CFL1;FYN;PAK2;EPHB4		R-HSA-3928633;R-HSA-3928632;R-HSA-3928639;R-HSA-3928627;R-HSA-3928625;R-HSA-3928624;R-HSA-3928631;R-HSA-3928628;R-HSA-3928617;R-HSA-3928623;R-HSA-3928610;R-HSA-3928608;R-HSA-3928615;R-HSA-3928614;R-HSA-3928612;R-HSA-3928602;R-HSA-3928601;R-HSA-3928600;R-HSA-3928607;R-HSA-4093339;R-HSA-4093336;R-HSA-3928604;R-HSA-3928595;R-HSA-3928594;R-HSA-3928657;R-HSA-4093332;R-HSA-3928656;R-HSA-3928592;R-HSA-4…
R-HSA-418217	G beta:gamma signalling through PLC beta	1	23	0.00164485	0.620147	0.620147	2	2	0.00017	9606	Homo sapiens	GNB4		R-HSA-398193;R-HSA-398040
R-HSA-416993	Trafficking of GluR2-containing AMPA receptors	1	23	0.00164485	0.620147	0.620147	2	3	0.000254	9606	Homo sapiens	PRKACA		R-HSA-421007;R-HSA-416639
R-HSA-500657	Presynaptic function of Kainate receptors	1	23	0.00164485	0.620147	0.620147	1	2	0.00017	9606	Homo sapiens	GNB4		R-HSA-500717
R-HSA-73980	RNA Polymerase III Transcription Termination	1	23	0.00164485	0.620147	0.620147	1	2	0.00017	9606	Homo sapiens	SSB		R-HSA-113454
R-HSA-881907	Gastrin-CREB signalling pathway via PKC and MAPK	1	23	0.00164485	0.620147	0.620147	2	9	0.000763	9606	Homo sapiens	PRKACA		R-HSA-2179413;R-HSA-400015
R-HSA-6804760	Regulation of TP53 Activity through Methylation	1	23	0.00164485	0.620147	0.620147	2	12	0.00101798	9606	Homo sapiens	PRMT5		R-HSA-6804383;R-HSA-6804379
R-HSA-432142	Platelet sensitization by LDL	1	23	0.00164485	0.620147	0.620147	1	9	0.000763	9606	Homo sapiens	PPP2R1A		R-HSA-432143
R-HSA-1433557	Signaling by SCF-KIT	2	50	0.00357577	0.621548	0.621548	21	36	0.00305395	9606	Homo sapiens	FYN;PRKACA		R-HSA-1433428;R-HSA-205319;R-HSA-1433488;R-HSA-1433456;R-HSA-1562641;R-HSA-1470012;R-HSA-205289;R-HSA-1470010;R-HSA-1472121;R-HSA-1470009;R-HSA-205234;R-HSA-1433508;R-HSA-1433542;R-HSA-205238;R-HSA-205205;R-HSA-1433506;R-HSA-1433454;R-HSA-1433451;R-HSA-1433418;R-HSA-1433514;R-HSA-205244
R-HSA-512988	Interleukin-3, Interleukin-5 and GM-CSF signaling	2	50	0.00357577	0.621548	0.621548	4	38	0.00322362	9606	Homo sapiens	FYN;PRKACA		R-HSA-879917;R-HSA-913451;R-HSA-912629;R-HSA-912627
R-HSA-448424	Interleukin-17 signaling	3	77	0.00550669	0.62866	0.62866	3	35	0.00296912	9606	Homo sapiens	PPP2R1A;UBE2N;UBE2V1		R-HSA-199959;R-HSA-450337;R-HSA-450346
R-HSA-975138	TRAF6 mediated induction of NFkB and MAP kinases upon TLR7/8 or 9 activation	4	103	0.00736609	0.629317	0.629317	6	47	0.00398711	9606	Homo sapiens	PPP2R1A;UBE2N;HMGB1;UBE2V1		R-HSA-199959;R-HSA-168166;R-HSA-450337;R-HSA-168184;R-HSA-975122;R-HSA-450346
R-HSA-168333	NEP/NS2 Interacts with the Cellular Export Machinery	2	51	0.00364729	0.632247	0.632247	2	2	0.00017	9606	Homo sapiens	XPO1;TPR		R-HSA-168880;R-HSA-168857
R-HSA-72306	tRNA processing	7	180	0.0128728	0.632611	0.632611	10	54	0.00458093	9606	Homo sapiens	TRMT112;QARS;NSUN2;TPR;FAM98B;TRNT1;EPRS;PUS7		R-HSA-6786583;R-HSA-5696807;R-HSA-6786501;R-HSA-6782388;R-HSA-5696816;R-HSA-6786881;R-HSA-6785409;R-HSA-6785438;R-HSA-6783483;R-HSA-6782296
R-HSA-8856828	Clathrin-mediated endocytosis	6	155	0.0110849	0.634784	0.634784	15	34	0.00288429	9606	Homo sapiens	COPS4;COPS2;PACSIN2;SNX9;NEDD8;DNM2		R-HSA-8868230;R-HSA-8863727;R-HSA-8868236;R-HSA-8868651;R-HSA-8863723;R-HSA-8867754;R-HSA-8863721;R-HSA-8868648;R-HSA-8868661;R-HSA-8868660;R-HSA-8868659;R-HSA-8868658;R-HSA-8869438;R-HSA-8871194;R-HSA-8871193
R-HSA-110320	Translesion Synthesis by POLH	1	24	0.00171637	0.635815	0.635815	6	8	0.000679	9606	Homo sapiens	RPA1		R-HSA-5654989;R-HSA-5654986;R-HSA-110317;R-HSA-110316;R-HSA-110319;R-HSA-5654985
R-HSA-500753	Pyrimidine biosynthesis	1	24	0.00171637	0.635815	0.635815	3	6	0.000509	9606	Homo sapiens	CAD		R-HSA-73571;R-HSA-73573;R-HSA-73577
R-HSA-8851708	Signaling by FGFR2 IIIa TM	1	24	0.00171637	0.635815	0.635815	1	2	0.00017	9606	Homo sapiens	GTF2F1		R-HSA-8851710
R-HSA-912631	Regulation of signaling by CBL	1	24	0.00171637	0.635815	0.635815	3	7	0.000594	9606	Homo sapiens	FYN		R-HSA-879917;R-HSA-912629;R-HSA-912627
R-HSA-429958	mRNA decay by 3' to 5' exoribonuclease	1	24	0.00171637	0.635815	0.635815	1	3	0.000254	9606	Homo sapiens	HBS1L		R-HSA-430028
R-HSA-5627117	RHO GTPases Activate ROCKs	1	24	0.00171637	0.635815	0.635815	1	6	0.000509	9606	Homo sapiens	CFL1		R-HSA-3928608
R-HSA-9018896	Biosynthesis of E-series 18(S)-resolvins	1	24	0.00171637	0.635815	0.635815	1	9	0.000763	9606	Homo sapiens	LTA4H		R-HSA-9018862
R-HSA-1834941	STING mediated induction of host immune responses	1	24	0.00171637	0.635815	0.635815	1	19	0.00161181	9606	Homo sapiens	TREX1		R-HSA-1834939
R-HSA-975155	MyD88 dependent cascade initiated on endosome	4	104	0.0074376	0.636782	0.636782	7	62	0.00525959	9606	Homo sapiens	PPP2R1A;UBE2N;HMGB1;UBE2V1		R-HSA-975118;R-HSA-199959;R-HSA-168166;R-HSA-450337;R-HSA-168184;R-HSA-975122;R-HSA-450346
R-HSA-168181	Toll Like Receptor 7/8 (TLR7/8) Cascade	4	104	0.0074376	0.636782	0.636782	7	63	0.00534442	9606	Homo sapiens	PPP2R1A;UBE2N;HMGB1;UBE2V1		R-HSA-975118;R-HSA-199959;R-HSA-168166;R-HSA-450337;R-HSA-168184;R-HSA-975122;R-HSA-450346
R-HSA-167162	RNA Polymerase II HIV Promoter Escape	2	52	0.0037188	0.642708	0.642708	9	9	0.000763	9606	Homo sapiens	GTF2B;GTF2F1		R-HSA-167474;R-HSA-9613490;R-HSA-167136;R-HSA-167121;R-HSA-9613498;R-HSA-167115;R-HSA-167113;R-HSA-167468;R-HSA-167117
R-HSA-167161	HIV Transcription Initiation	2	52	0.0037188	0.642708	0.642708	4	4	0.000339	9606	Homo sapiens	GTF2B;GTF2F1		R-HSA-167477;R-HSA-167130;R-HSA-167134;R-HSA-167118
R-HSA-75953	RNA Polymerase II Transcription Initiation	2	52	0.0037188	0.642708	0.642708	3	3	0.000254	9606	Homo sapiens	GTF2B;GTF2F1		R-HSA-75861;R-HSA-75864;R-HSA-75866
R-HSA-8864260	Transcriptional regulation by the AP-2 (TFAP2) family of transcription factors	2	52	0.0037188	0.642708	0.642708	33	44	0.00373261	9606	Homo sapiens	TFAP2A		R-HSA-8869575;R-HSA-8864453;R-HSA-8869568;R-HSA-8864718;R-HSA-8869580;R-HSA-8864395;R-HSA-8864343;R-HSA-3234081;R-HSA-8869590;R-HSA-8864278;R-HSA-8864466;R-HSA-8864989;R-HSA-8865244;R-HSA-8864412;R-HSA-8864729;R-HSA-8864999;R-HSA-8869543;R-HSA-8869542;R-HSA-8864737;R-HSA-8864431;R-HSA-8869549;R-HSA-8864426;R-HSA-8864361;R-HSA-8865256;R-HSA-8864936;R-HSA-8869558;R-HSA-8864307;R-HSA-8864690;R-HSA-8…
R-HSA-3108214	SUMOylation of DNA damage response and repair proteins	3	79	0.00564972	0.645725	0.645725	7	24	0.00203597	9606	Homo sapiens	PARP1;TPR;RPA1		R-HSA-3000348;R-HSA-4551604;R-HSA-3000399;R-HSA-5228508;R-HSA-4551616;R-HSA-3000411;R-HSA-4551768
R-HSA-3000178	ECM proteoglycans	3	79	0.00564972	0.645725	0.645725	3	23	0.00195114	9606	Homo sapiens	LAMA5;DAG1;LAMC1		R-HSA-2467716;R-HSA-2396124;R-HSA-2396395
R-HSA-1839117	Signaling by cytosolic FGFR1 fusion mutants	1	25	0.00178788	0.650837	0.650837	7	14	0.00118765	9606	Homo sapiens	TRIM24		R-HSA-1839039;R-HSA-1839112;R-HSA-1839080;R-HSA-1839065;R-HSA-1839078;R-HSA-1839031;R-HSA-1839091
R-HSA-1368082	RORA activates gene expression	1	25	0.00178788	0.650837	0.650837	1	4	0.000339	9606	Homo sapiens	TBL1XR1		R-HSA-1801587
R-HSA-73929	Base-Excision Repair, AP Site Formation	1	25	0.00178788	0.650837	0.650837	8	44	0.00373261	9606	Homo sapiens	NTHL1		R-HSA-110224;R-HSA-110208;R-HSA-110227;R-HSA-110211;R-HSA-110226;R-HSA-110229;R-HSA-110213;R-HSA-110212
R-HSA-1237112	Methionine salvage pathway	1	25	0.00178788	0.650837	0.650837	1	7	0.000594	9606	Homo sapiens	GOT1		R-HSA-1237102
R-HSA-6807004	Negative regulation of MET activity	1	25	0.00178788	0.650837	0.650837	1	10	0.000848	9606	Homo sapiens	PTPRJ		R-HSA-6807008
R-HSA-445144	Signal transduction by L1	1	25	0.00178788	0.650837	0.650837	1	11	0.000933	9606	Homo sapiens	MAP2K2		R-HSA-109862
R-HSA-190236	Signaling by FGFR	4	106	0.00758063	0.651417	0.651417	11	142	0.0120461	9606	Homo sapiens	TIA1;PPP2R1A;GTF2F1		R-HSA-6803527;R-HSA-934559;R-HSA-1295632;R-HSA-6803523;R-HSA-1295622;R-HSA-6803838;R-HSA-1295609;R-HSA-1549564;R-HSA-6803836;R-HSA-1295599;R-HSA-1295613
R-HSA-73776	RNA Polymerase II Promoter Escape	2	53	0.00379032	0.652933	0.652933	7	7	0.000594	9606	Homo sapiens	GTF2B;GTF2F1		R-HSA-75873;R-HSA-111264;R-HSA-76576;R-HSA-9613494;R-HSA-75850;R-HSA-9613497;R-HSA-75869
R-HSA-5250913	Positive epigenetic regulation of rRNA expression	3	80	0.00572123	0.654047	0.654047	5	7	0.000594	9606	Homo sapiens	CAST;RPA1;CHD3		R-HSA-5250930;R-HSA-5250947;R-HSA-5250938;R-HSA-427404;R-HSA-427336
R-HSA-4086398	Ca2+ pathway	3	80	0.00572123	0.654047	0.654047	8	27	0.00229047	9606	Homo sapiens	AGO2;GNB4;PRKACA		R-HSA-4332390;R-HSA-398193;R-HSA-3965444;R-HSA-4518575;R-HSA-3965447;R-HSA-4518585;R-HSA-3965441;R-HSA-398040
R-HSA-168164	Toll Like Receptor 3 (TLR3) Cascade	4	107	0.00765215	0.658586	0.658586	6	60	0.00508992	9606	Homo sapiens	PPP2R1A;UBE2N;HMGB1;UBE2V1		R-HSA-199959;R-HSA-168166;R-HSA-450337;R-HSA-168184;R-HSA-450346;R-HSA-9014342
R-HSA-72163	mRNA Splicing - Major Pathway	7	185	0.0132304	0.66048	0.66048	8	9	0.000763	9606	Homo sapiens	GPKOW;DDX46;PRCC;SRSF2;UPF3B;GTF2F1;SRSF11		R-HSA-72160;R-HSA-72130;R-HSA-156661;R-HSA-72139;R-HSA-72107;R-HSA-72124;R-HSA-72143;R-HSA-72127
R-HSA-69473	G2/M DNA damage checkpoint	3	81	0.00579275	0.662228	0.662228	4	12	0.00101798	9606	Homo sapiens	RPA1;UBE2N;CDK1		R-HSA-5683735;R-HSA-69891;R-HSA-6799332;R-HSA-170070
R-HSA-6785807	Interleukin-4 and Interleukin-13 signaling	8	211	0.0150898	0.662709	0.662709	2	46	0.00390227	9606	Homo sapiens	LAMA5;HSP90AA1;ANXA1;FSCN1		R-HSA-6785895;R-HSA-6790041
R-HSA-442755	Activation of NMDA receptors and postsynaptic events	2	54	0.00386183	0.662923	0.662923	1	25	0.0021208	9606	Homo sapiens	PRKACA		R-HSA-111919
R-HSA-5637812	Signaling by EGFRvIII in Cancer	1	26	0.0018594	0.665241	0.665241	18	18	0.00152698	9606	Homo sapiens	HSP90AA1		R-HSA-5637808;R-HSA-1247999;R-HSA-5638137;R-HSA-5637798;R-HSA-5637766;R-HSA-1248002;R-HSA-5637764;R-HSA-5637796;R-HSA-5637765;R-HSA-5637794;R-HSA-5637795;R-HSA-5637792;R-HSA-5637806;R-HSA-1218824;R-HSA-5637770;R-HSA-1248655;R-HSA-5637800;R-HSA-5637801
R-HSA-5637810	Constitutive Signaling by EGFRvIII	1	26	0.0018594	0.665241	0.665241	18	18	0.00152698	9606	Homo sapiens	HSP90AA1		R-HSA-5637808;R-HSA-1247999;R-HSA-5638137;R-HSA-5637798;R-HSA-5637766;R-HSA-1248002;R-HSA-5637764;R-HSA-5637796;R-HSA-5637765;R-HSA-5637794;R-HSA-5637795;R-HSA-5637792;R-HSA-5637806;R-HSA-1218824;R-HSA-5637770;R-HSA-1248655;R-HSA-5637800;R-HSA-5637801
R-HSA-428930	Thromboxane signalling through TP receptor	1	26	0.0018594	0.665241	0.665241	6	7	0.000594	9606	Homo sapiens	GNB4		R-HSA-428918;R-HSA-428917;R-HSA-428752;R-HSA-428750;R-HSA-428909;R-HSA-428749
R-HSA-198753	ERK/MAPK targets	1	26	0.0018594	0.665241	0.665241	1	7	0.000594	9606	Homo sapiens	PPP2R1A		R-HSA-199959
R-HSA-210991	Basigin interactions	1	26	0.0018594	0.665241	0.665241	1	10	0.000848	9606	Homo sapiens	PPIA		R-HSA-204485
R-HSA-168138	Toll Like Receptor 9 (TLR9) Cascade	4	108	0.00772366	0.665654	0.665654	7	66	0.00559891	9606	Homo sapiens	PPP2R1A;UBE2N;HMGB1;UBE2V1		R-HSA-975118;R-HSA-199959;R-HSA-168166;R-HSA-450337;R-HSA-168184;R-HSA-975122;R-HSA-450346
R-HSA-937061	TRIF(TICAM1)-mediated TLR4 signaling	4	108	0.00772366	0.665654	0.665654	6	57	0.00483543	9606	Homo sapiens	PPP2R1A;UBE2N;HMGB1;UBE2V1		R-HSA-168915;R-HSA-199959;R-HSA-168166;R-HSA-450337;R-HSA-168184;R-HSA-450346
R-HSA-166166	MyD88-independent TLR4 cascade	4	108	0.00772366	0.665654	0.665654	6	59	0.00500509	9606	Homo sapiens	PPP2R1A;UBE2N;HMGB1;UBE2V1		R-HSA-168915;R-HSA-199959;R-HSA-168166;R-HSA-450337;R-HSA-168184;R-HSA-450346
R-HSA-76042	RNA Polymerase II Transcription Initiation And Promoter Clearance	2	55	0.00393335	0.672681	0.672681	11	11	0.000933	9606	Homo sapiens	GTF2B;GTF2F1		R-HSA-75873;R-HSA-111264;R-HSA-76576;R-HSA-75861;R-HSA-9613494;R-HSA-75864;R-HSA-75866;R-HSA-75850;R-HSA-9613497;R-HSA-75869;R-HSA-75949
R-HSA-3928665	EPH-ephrin mediated repulsion of cells	2	55	0.00393335	0.672681	0.672681	8	9	0.000763	9606	Homo sapiens	FYN;EPHB4		R-HSA-4093327;R-HSA-3928607;R-HSA-3928654;R-HSA-3928604;R-HSA-3928642;R-HSA-3928657;R-HSA-3928656;R-HSA-3928628
R-HSA-2299718	Condensation of Prophase Chromosomes	2	55	0.00393335	0.672681	0.672681	3	10	0.000848	9606	Homo sapiens	SET;CDK1		R-HSA-2245218;R-HSA-2429719;R-HSA-2294600
R-HSA-73854	RNA Polymerase I Promoter Clearance	3	83	0.00593578	0.678167	0.678167	5	9	0.000763	9606	Homo sapiens	CAST;RPA1;CHD3		R-HSA-73865;R-HSA-73769;R-HSA-73739;R-HSA-73757;R-HSA-73758
R-HSA-1980143	Signaling by NOTCH1	3	83	0.00593578	0.678167	0.678167	1	37	0.00313878	9606	Homo sapiens	NCOR2;NCOR1;TBL1XR1		R-HSA-1912388
R-HSA-5627123	RHO GTPases activate PAKs	1	27	0.00193092	0.679052	0.679052	6	15	0.00127248	9606	Homo sapiens	PAK2		R-HSA-8981931;R-HSA-5668932;R-HSA-445797;R-HSA-442832;R-HSA-5627775;R-HSA-5668984
R-HSA-9018676	Biosynthesis of D-series resolvins	1	27	0.00193092	0.679052	0.679052	2	11	0.000933	9606	Homo sapiens	LTA4H		R-HSA-9020253;R-HSA-9020258
R-HSA-5652084	Fructose metabolism	1	27	0.00193092	0.679052	0.679052	1	7	0.000594	9606	Homo sapiens	SORD		R-HSA-5652195
R-HSA-166058	MyD88:MAL(TIRAP) cascade initiated on plasma membrane	4	110	0.00786669	0.67949	0.67949	6	63	0.00534442	9606	Homo sapiens	PPP2R1A;UBE2N;HMGB1;UBE2V1		R-HSA-199959;R-HSA-937050;R-HSA-168166;R-HSA-450337;R-HSA-168184;R-HSA-450346
R-HSA-168188	Toll Like Receptor TLR6:TLR2 Cascade	4	110	0.00786669	0.67949	0.67949	6	65	0.00551408	9606	Homo sapiens	PPP2R1A;UBE2N;HMGB1;UBE2V1		R-HSA-199959;R-HSA-937050;R-HSA-168166;R-HSA-450337;R-HSA-168184;R-HSA-450346
R-HSA-72165	mRNA Splicing - Minor Pathway	2	56	0.00400486	0.682208	0.682208	5	5	0.000424	9606	Homo sapiens	SRSF2;GTF2F1		R-HSA-75079;R-HSA-75081;R-HSA-75080;R-HSA-75083;R-HSA-75082
R-HSA-427413	NoRC negatively regulates rRNA expression	3	84	0.0060073	0.685926	0.685926	4	7	0.000594	9606	Homo sapiens	CAST;RPA1;ARID4B		R-HSA-427366;R-HSA-427409;R-HSA-5227490;R-HSA-433672
R-HSA-416482	G alpha (12/13) signalling events	3	84	0.0060073	0.685926	0.685926	5	11	0.000933	9606	Homo sapiens	TRIO;GNB4;ARHGEF2		R-HSA-751019;R-HSA-751039;R-HSA-419166;R-HSA-751027;R-HSA-751029
R-HSA-3238698	WNT ligand biogenesis and trafficking	1	28	0.00200243	0.692294	0.692294	9	12	0.00101798	9606	Homo sapiens	WLS		R-HSA-3247840;R-HSA-3247843;R-HSA-3247844;R-HSA-3247847;R-HSA-3247849;R-HSA-3781941;R-HSA-3247836;R-HSA-3781943;R-HSA-3247839
R-HSA-6804115	TP53 regulates transcription of additional cell cycle genes whose exact role in the p53 pathway remain uncertain	1	28	0.00200243	0.692294	0.692294	1	14	0.00118765	9606	Homo sapiens	TNKS1BP1		R-HSA-6798044
R-HSA-168179	Toll Like Receptor TLR1:TLR2 Cascade	4	113	0.00808124	0.699485	0.699485	6	65	0.00551408	9606	Homo sapiens	PPP2R1A;UBE2N;HMGB1;UBE2V1		R-HSA-199959;R-HSA-937050;R-HSA-168166;R-HSA-450337;R-HSA-168184;R-HSA-450346
R-HSA-181438	Toll Like Receptor 2 (TLR2) Cascade	4	113	0.00808124	0.699485	0.699485	6	67	0.00568375	9606	Homo sapiens	PPP2R1A;UBE2N;HMGB1;UBE2V1		R-HSA-199959;R-HSA-937050;R-HSA-168166;R-HSA-450337;R-HSA-168184;R-HSA-450346
R-HSA-912446	Meiotic recombination	2	58	0.00414789	0.700582	0.700582	4	9	0.000763	9606	Homo sapiens	CDK2;RPA1		R-HSA-912429;R-HSA-912458;R-HSA-912503;R-HSA-912496
R-HSA-8943723	Regulation of PTEN mRNA translation	1	29	0.00207395	0.70499	0.70499	22	24	0.00203597	9606	Homo sapiens	AGO2		R-HSA-8944522;R-HSA-2318752;R-HSA-8948651;R-HSA-8944684;R-HSA-8948524;R-HSA-8945709;R-HSA-8948621;R-HSA-8948623;R-HSA-8948641;R-HSA-8944483;R-HSA-8948612;R-HSA-8948582;R-HSA-8948583;R-HSA-8944632;R-HSA-8948536;R-HSA-8944569;R-HSA-8948569;R-HSA-8944538;R-HSA-8948602;R-HSA-8944497;R-HSA-8948594;R-HSA-8944599
R-HSA-392451	G beta:gamma signalling through PI3Kgamma	1	29	0.00207395	0.70499	0.70499	2	4	0.000339	9606	Homo sapiens	GNB4		R-HSA-392295;R-HSA-392300
R-HSA-418592	ADP signalling through P2Y purinoceptor 1	1	29	0.00207395	0.70499	0.70499	3	7	0.000594	9606	Homo sapiens	GNB4		R-HSA-418581;R-HSA-418579;R-HSA-418576
R-HSA-933542	TRAF6 mediated NF-kB activation	1	29	0.00207395	0.70499	0.70499	1	4	0.000339	9606	Homo sapiens	HMGB1		R-HSA-168166
R-HSA-198725	Nuclear Events (kinase and transcription factor activation)	1	29	0.00207395	0.70499	0.70499	1	11	0.000933	9606	Homo sapiens	PPP2R1A		R-HSA-199959
R-HSA-3000170	Syndecan interactions	1	29	0.00207395	0.70499	0.70499	1	15	0.00127248	9606	Homo sapiens	PRKACA		R-HSA-2750187
R-HSA-6806834	Signaling by MET	3	87	0.00622184	0.708359	0.708359	2	49	0.00415677	9606	Homo sapiens	LAMA5;PTPRJ;LAMC1		R-HSA-6807008;R-HSA-8874079
R-HSA-373752	Netrin-1 signaling	2	59	0.00421941	0.709434	0.709434	8	37	0.00313878	9606	Homo sapiens	TRIO;FYN		R-HSA-373716;R-HSA-418868;R-HSA-418850;R-HSA-418865;R-HSA-374701;R-HSA-418874;R-HSA-418858;R-HSA-418856
R-HSA-166520	Signaling by NTRKs	4	115	0.00822427	0.712309	0.712309	15	120	0.0101798	9606	Homo sapiens	PPP2R1A;KIDINS220;FYN;DNM2		R-HSA-169891;R-HSA-169895;R-HSA-9612980;R-HSA-9032582;R-HSA-169901;R-HSA-9032601;R-HSA-9032761;R-HSA-169904;R-HSA-169905;R-HSA-199959;R-HSA-9032798;R-HSA-9037040;R-HSA-9032532;R-HSA-177501;R-HSA-9032502
R-HSA-72172	mRNA Splicing	7	196	0.014017	0.717097	0.717097	13	14	0.00118765	9606	Homo sapiens	GPKOW;DDX46;PRCC;SRSF2;UPF3B;GTF2F1;SRSF11		R-HSA-72160;R-HSA-72130;R-HSA-75079;R-HSA-75081;R-HSA-75080;R-HSA-72139;R-HSA-72107;R-HSA-75083;R-HSA-75082;R-HSA-72143;R-HSA-156661;R-HSA-72124;R-HSA-72127
R-HSA-202040	G-protein activation	1	30	0.00214546	0.717164	0.717164	5	6	0.000509	9606	Homo sapiens	GNB4		R-HSA-167408;R-HSA-167429;R-HSA-167419;R-HSA-167433;R-HSA-112271
R-HSA-392170	ADP signalling through P2Y purinoceptor 12	1	30	0.00214546	0.717164	0.717164	3	4	0.000339	9606	Homo sapiens	GNB4		R-HSA-392195;R-HSA-392187;R-HSA-392202
R-HSA-5357956	TNFR1-induced NFkappaB signaling pathway	1	30	0.00214546	0.717164	0.717164	1	5	0.000424	9606	Homo sapiens	GNB2L1		R-HSA-5357776
R-HSA-264876	Insulin processing	1	30	0.00214546	0.717164	0.717164	1	16	0.00135731	9606	Homo sapiens	KIF5B		R-HSA-265160
R-HSA-168256	Immune System	106	2641	0.188872	0.718442	0.718442	151	1493	0.126654	9606	Homo sapiens	GPI;EIF4A1;AHCYL1;GDI2;PTPRJ;HMGB1;KIF11;PSMD8;PSMD5;PPP2R1A;KIF5B;CFL1;CPNE1;PRKACA;PGM1;CBR1;CCT2;SERPINB1;HSP90AA1;SEC13;ANXA1;ANAPC7;GSTO1;PGAM1;NME2;TALDO1;LMO7;MIF;TUBA4A;SERPINB6;DNM2;ENAH;ACLY;PSMA6;PKM;PSMA4;KIF2A;PSMA2;TCP1;FSCN1;UBE2V1;ALDOA;PPIA;VCL;PAFAH1B2;LAMA5;SEC23A;PSMD11;DCTN2;DCTN1;UBR4;TXN;KLC1;PSMA7;COMMD9;CAND1;PSMB5;TPR;PSMB1;FYN;CCT8;LTA4H;PAK2;CD55;VASP;BTF3;DYNC1H1;TREX…		R-HSA-975118;R-HSA-389381;R-HSA-6785895;R-HSA-741386;R-HSA-688137;R-HSA-2130725;R-HSA-2130731;R-HSA-2395439;R-HSA-3244605;R-HSA-879362;R-HSA-1168640;R-HSA-981535;R-HSA-199959;R-HSA-8950175;R-HSA-5607757;R-HSA-5607756;R-HSA-975122;R-HSA-879917;R-HSA-389158;R-HSA-202534;R-HSA-913451;R-HSA-8950190;R-HSA-450337;R-HSA-450346;R-HSA-2395412;R-HSA-1296421;R-HSA-8950718;R-HSA-419644;R-HSA-419645;R-HSA-562…
R-HSA-73864	RNA Polymerase I Transcription	3	89	0.00636487	0.722619	0.722619	9	14	0.00118765	9606	Homo sapiens	CAST;RPA1;CHD3		R-HSA-74993;R-HSA-74992;R-HSA-74994;R-HSA-73865;R-HSA-73769;R-HSA-73739;R-HSA-74986;R-HSA-73757;R-HSA-73758
R-HSA-166016	Toll Like Receptor 4 (TLR4) Cascade	5	144	0.0102982	0.723682	0.723682	8	94	0.00797421	9606	Homo sapiens	PPP2R1A;UBE2N;HMGB1;UBE2V1;DNM2		R-HSA-168915;R-HSA-199959;R-HSA-937050;R-HSA-168166;R-HSA-450337;R-HSA-168184;R-HSA-2201293;R-HSA-450346
R-HSA-5686938	Regulation of TLR by endogenous ligand	1	31	0.00221698	0.728836	0.728836	4	12	0.00101798	9606	Homo sapiens	HMGB1		R-HSA-6804100;R-HSA-6804099;R-HSA-6805981;R-HSA-5432825
R-HSA-389887	Beta-oxidation of pristanoyl-CoA	1	31	0.00221698	0.728836	0.728836	1	11	0.000933	9606	Homo sapiens	AMACR		R-HSA-389897
R-HSA-5601884	PIWI-interacting RNA (piRNA) biogenesis	1	31	0.00221698	0.728836	0.728836	1	15	0.00127248	9606	Homo sapiens	HSP90AA1		R-HSA-5601883
R-HSA-5693607	Processing of DNA double-strand break ends	3	90	0.00643639	0.729543	0.729543	11	17	0.00144214	9606	Homo sapiens	CDK2;RPA1;UBE2N		R-HSA-5693542;R-HSA-5684887;R-HSA-5684071;R-HSA-5685156;R-HSA-5684052;R-HSA-5684882;R-HSA-5685011;R-HSA-5684096;R-HSA-5684081;R-HSA-5687758;R-HSA-5684875
R-HSA-187037	Signaling by NTRK1 (TRKA)	3	90	0.00643639	0.729543	0.729543	8	58	0.00492026	9606	Homo sapiens	PPP2R1A;KIDINS220;DNM2		R-HSA-169891;R-HSA-169904;R-HSA-169905;R-HSA-199959;R-HSA-169895;R-HSA-9612980;R-HSA-177501;R-HSA-169901
R-HSA-5250924	B-WICH complex positively regulates rRNA expression	2	62	0.00443396	0.734682	0.734682	3	3	0.000254	9606	Homo sapiens	CAST;RPA1		R-HSA-5250930;R-HSA-5250947;R-HSA-5250938
R-HSA-1221632	Meiotic synapsis	2	62	0.00443396	0.734682	0.734682	1	6	0.000509	9606	Homo sapiens	LMNA;TPP1		R-HSA-912408
R-HSA-400042	Adrenaline,noradrenaline inhibits insulin secretion	1	32	0.00228849	0.740027	0.740027	4	6	0.000509	9606	Homo sapiens	GNB4		R-HSA-400037;R-HSA-400097;R-HSA-400046;R-HSA-400092
R-HSA-8934593	Regulation of RUNX1 Expression and Activity	1	32	0.00228849	0.740027	0.740027	6	19	0.00161181	9606	Homo sapiens	AGO2		R-HSA-8935864;R-HSA-8935785;R-HSA-8939129;R-HSA-8935930;R-HSA-8936058;R-HSA-8936068
R-HSA-9006115	Signaling by NTRK2 (TRKB)	1	32	0.00228849	0.740027	0.740027	7	38	0.00322362	9606	Homo sapiens	FYN		R-HSA-9032601;R-HSA-9032761;R-HSA-9032798;R-HSA-9037040;R-HSA-9032532;R-HSA-9032582;R-HSA-9032502
R-HSA-70635	Urea cycle	1	32	0.00228849	0.740027	0.740027	1	8	0.000679	9606	Homo sapiens	CPS1		R-HSA-70555
R-HSA-210500	Glutamate Neurotransmitter Release Cycle	1	32	0.00228849	0.740027	0.740027	1	8	0.000679	9606	Homo sapiens	SLC1A3		R-HSA-210404
R-HSA-5674400	Constitutive Signaling by AKT1 E17K in Cancer	1	32	0.00228849	0.740027	0.740027	1	18	0.00152698	9606	Homo sapiens	MTOR		R-HSA-2243938
R-HSA-73777	RNA Polymerase I Chain Elongation	2	63	0.00450547	0.742674	0.742674	1	1	8.48e-05	9606	Homo sapiens	CAST;RPA1		R-HSA-74986
R-HSA-193648	NRAGE signals death through JNK	2	63	0.00450547	0.742674	0.742674	1	7	0.000594	9606	Homo sapiens	TRIO;ARHGEF2		R-HSA-205039
R-HSA-5250941	Negative epigenetic regulation of rRNA expression	3	93	0.00665093	0.749501	0.749501	4	12	0.00101798	9606	Homo sapiens	CAST;RPA1;ARID4B		R-HSA-427366;R-HSA-427409;R-HSA-5227490;R-HSA-433672
R-HSA-3928663	EPHA-mediated growth cone collapse	1	33	0.00236001	0.750757	0.750757	3	4	0.000339	9606	Homo sapiens	FYN		R-HSA-3928651;R-HSA-3928602;R-HSA-3928648
R-HSA-4641262	Disassembly of the destruction complex and recruitment of AXIN to the membrane	1	33	0.00236001	0.750757	0.750757	2	7	0.000594	9606	Homo sapiens	PPP2R1A		R-HSA-201685;R-HSA-3601585
R-HSA-9018679	Biosynthesis of EPA-derived SPMs	1	33	0.00236001	0.750757	0.750757	2	17	0.00144214	9606	Homo sapiens	LTA4H		R-HSA-9018877;R-HSA-9018862
R-HSA-425410	Metal ion SLC transporters	1	33	0.00236001	0.750757	0.750757	1	20	0.00169664	9606	Homo sapiens	SLC39A10		R-HSA-442345
R-HSA-9006931	Signaling by Nuclear Receptors	8	230	0.0164485	0.75094	0.75094	15	93	0.00788938	9606	Homo sapiens	CDK9;HSP90AA1;JUND;CCNT1;AGO2;GTF2F1;FKBP4		R-HSA-9012203;R-HSA-9032751;R-HSA-9011971;R-HSA-8939203;R-HSA-8939204;R-HSA-9012196;R-HSA-9011975;R-HSA-9011961;R-HSA-9012315;R-HSA-9012186;R-HSA-9011997;R-HSA-9012319;R-HSA-9038161;R-HSA-9012208;R-HSA-9011958
R-HSA-1474165	Reproduction	4	123	0.0087964	0.759584	0.759584	5	24	0.00203597	9606	Homo sapiens	CDK2;LMNA;RPA1;TPP1		R-HSA-912429;R-HSA-912408;R-HSA-912458;R-HSA-912503;R-HSA-912496
R-HSA-171306	Packaging Of Telomere Ends	1	34	0.00243152	0.761044	0.761044	2	2	0.00017	9606	Homo sapiens	TPP1		R-HSA-181450;R-HSA-176700
R-HSA-397795	G-protein beta:gamma signalling	1	34	0.00243152	0.761044	0.761044	4	6	0.000509	9606	Homo sapiens	GNB4		R-HSA-392295;R-HSA-398193;R-HSA-392300;R-HSA-398040
R-HSA-5654732	Negative regulation of FGFR3 signaling	1	34	0.00243152	0.761044	0.761044	7	14	0.00118765	9606	Homo sapiens	PPP2R1A		R-HSA-934559;R-HSA-1295632;R-HSA-1295622;R-HSA-1295609;R-HSA-1549564;R-HSA-1295599;R-HSA-1295613
R-HSA-451326	Activation of kainate receptors upon glutamate binding	1	34	0.00243152	0.761044	0.761044	1	6	0.000509	9606	Homo sapiens	GNB4		R-HSA-500717
R-HSA-8979227	Triglyceride metabolism	2	66	0.00472002	0.765421	0.765421	2	24	0.00203597	9606	Homo sapiens	PRKACA		R-HSA-163418;R-HSA-163416
R-HSA-2424491	DAP12 signaling	1	35	0.00250304	0.770908	0.770908	10	17	0.00144214	9606	Homo sapiens	FYN		R-HSA-2395412;R-HSA-2424484;R-HSA-210289;R-HSA-2424486;R-HSA-2424487;R-HSA-2424480;R-HSA-2396594;R-HSA-2424482;R-HSA-2395439;R-HSA-2395801
R-HSA-5654733	Negative regulation of FGFR4 signaling	1	35	0.00250304	0.770908	0.770908	7	14	0.00118765	9606	Homo sapiens	PPP2R1A		R-HSA-934559;R-HSA-1295632;R-HSA-1295622;R-HSA-1295609;R-HSA-1549564;R-HSA-1295599;R-HSA-1295613
R-HSA-456926	Thrombin signalling through proteinase activated receptors (PARs)	1	35	0.00250304	0.770908	0.770908	6	14	0.00118765	9606	Homo sapiens	GNB4		R-HSA-396996;R-HSA-397891;R-HSA-114552;R-HSA-396941;R-HSA-397835;R-HSA-114558
R-HSA-1251985	Nuclear signaling by ERBB4	1	35	0.00250304	0.770908	0.770908	6	22	0.0018663	9606	Homo sapiens	NCOR1		R-HSA-8954185;R-HSA-1253319;R-HSA-1253321;R-HSA-8954179;R-HSA-8954182;R-HSA-1253325
R-HSA-1250196	SHC1 events in ERBB2 signaling	1	35	0.00250304	0.770908	0.770908	1	6	0.000509	9606	Homo sapiens	PRKACA		R-HSA-8934446
R-HSA-418360	Platelet calcium homeostasis	1	35	0.00250304	0.770908	0.770908	1	8	0.000679	9606	Homo sapiens	SRI		R-HSA-425661
R-HSA-450282	MAPK targets/ Nuclear events mediated by MAP kinases	1	35	0.00250304	0.770908	0.770908	1	16	0.00135731	9606	Homo sapiens	PPP2R1A		R-HSA-199959
R-HSA-156590	Glutathione conjugation	2	67	0.00479153	0.772606	0.772606	2	14	0.00118765	9606	Homo sapiens	GSTO1;MGST3		R-HSA-176054;R-HSA-176059
R-HSA-174824	Plasma lipoprotein assembly, remodeling, and clearance	3	98	0.00700851	0.780123	0.780123	2	84	0.00712589	9606	Homo sapiens	HDLBP;PRKACA		R-HSA-5682101;R-HSA-8858252
R-HSA-380972	Energy dependent regulation of mTOR by LKB1-AMPK	1	36	0.00257456	0.780365	0.780365	2	7	0.000594	9606	Homo sapiens	MTOR		R-HSA-447074;R-HSA-380979
R-HSA-8863795	Downregulation of ERBB2 signaling	1	36	0.00257456	0.780365	0.780365	2	14	0.00118765	9606	Homo sapiens	HSP90AA1		R-HSA-1918092;R-HSA-1918095
R-HSA-159227	Transport of the SLBP independent Mature mRNA	1	37	0.00264607	0.789433	0.789433	3	3	0.000254	9606	Homo sapiens	TPR		R-HSA-158481;R-HSA-158484;R-HSA-111439
R-HSA-399719	Trafficking of AMPA receptors	1	37	0.00264607	0.789433	0.789433	2	4	0.000339	9606	Homo sapiens	PRKACA		R-HSA-421007;R-HSA-416639
R-HSA-203615	eNOS activation	1	37	0.00264607	0.789433	0.789433	8	20	0.00169664	9606	Homo sapiens	HSP90AA1		R-HSA-202129;R-HSA-1497796;R-HSA-202144;R-HSA-1497810;R-HSA-202137;R-HSA-202111;R-HSA-202127;R-HSA-1497784
R-HSA-4085377	SUMOylation of SUMOylation proteins	1	37	0.00264607	0.789433	0.789433	2	5	0.000424	9606	Homo sapiens	TPR		R-HSA-4551649;R-HSA-4551679
R-HSA-187687	Signalling to ERKs	1	37	0.00264607	0.789433	0.789433	6	25	0.0021208	9606	Homo sapiens	KIDINS220		R-HSA-169891;R-HSA-169904;R-HSA-169905;R-HSA-169895;R-HSA-9612980;R-HSA-169901
R-HSA-1474151	Tetrahydrobiopterin (BH4) synthesis, recycling, salvage and regulation	1	37	0.00264607	0.789433	0.789433	2	15	0.00127248	9606	Homo sapiens	HSP90AA1		R-HSA-1497796;R-HSA-1497784
R-HSA-168325	Viral Messenger RNA Synthesis	2	70	0.00500608	0.79302	0.79302	3	7	0.000594	9606	Homo sapiens	TPR;GTF2F1		R-HSA-192627;R-HSA-168326;R-HSA-192925
R-HSA-8943724	Regulation of PTEN gene transcription	2	70	0.00500608	0.79302	0.79302	4	15	0.00127248	9606	Homo sapiens	CHD3;MTOR		R-HSA-8944104;R-HSA-8944457;R-HSA-8943780;R-HSA-8944454
R-HSA-2426168	Activation of gene expression by SREBF (SREBP)	2	70	0.00500608	0.79302	0.79302	4	42	0.00356295	9606	Homo sapiens	FEN1;TBL1XR1		R-HSA-1655848;R-HSA-1655835;R-HSA-1655850;R-HSA-1655826
R-HSA-1236382	Constitutive Signaling by Ligand-Responsive EGFR Cancer Variants	1	38	0.00271759	0.798127	0.798127	23	23	0.00195114	9606	Homo sapiens	HSP90AA1		R-HSA-1218833;R-HSA-1225947;R-HSA-1226014;R-HSA-1225950;R-HSA-1225951;R-HSA-1226012;R-HSA-1225949;R-HSA-1220610;R-HSA-1220611;R-HSA-1247842;R-HSA-1247841;R-HSA-1226016;R-HSA-1225952;R-HSA-1220614;R-HSA-1225956;R-HSA-1220612;R-HSA-1247844;R-HSA-1225957;R-HSA-1220613;R-HSA-1218824;R-HSA-1225960;R-HSA-1225961;R-HSA-1169421
R-HSA-5637815	Signaling by Ligand-Responsive EGFR Variants in Cancer	1	38	0.00271759	0.798127	0.798127	23	23	0.00195114	9606	Homo sapiens	HSP90AA1		R-HSA-1218833;R-HSA-1225947;R-HSA-1226014;R-HSA-1225950;R-HSA-1225951;R-HSA-1226012;R-HSA-1225949;R-HSA-1220610;R-HSA-1220611;R-HSA-1247842;R-HSA-1247841;R-HSA-1226016;R-HSA-1225952;R-HSA-1220614;R-HSA-1225956;R-HSA-1220612;R-HSA-1247844;R-HSA-1225957;R-HSA-1220613;R-HSA-1218824;R-HSA-1225960;R-HSA-1225961;R-HSA-1169421
R-HSA-159230	Transport of the SLBP Dependant Mature mRNA	1	38	0.00271759	0.798127	0.798127	3	3	0.000254	9606	Homo sapiens	TPR		R-HSA-77587;R-HSA-159046;R-HSA-159050
R-HSA-1643713	Signaling by EGFR in Cancer	1	38	0.00271759	0.798127	0.798127	40	42	0.00356295	9606	Homo sapiens	HSP90AA1		R-HSA-1218833;R-HSA-1225947;R-HSA-1226014;R-HSA-1225950;R-HSA-1225951;R-HSA-1226012;R-HSA-1225949;R-HSA-1220610;R-HSA-5637766;R-HSA-1220611;R-HSA-1248002;R-HSA-5637764;R-HSA-5637765;R-HSA-1220614;R-HSA-1220612;R-HSA-1220613;R-HSA-1218824;R-HSA-1169421;R-HSA-5637770;R-HSA-1248655;R-HSA-5637808;R-HSA-1247999;R-HSA-5638137;R-HSA-5637798;R-HSA-1247842;R-HSA-1247841;R-HSA-1226016;R-HSA-1225952;R-HSA-5…
R-HSA-170822	Regulation of Glucokinase by Glucokinase Regulatory Protein	1	38	0.00271759	0.798127	0.798127	1	5	0.000424	9606	Homo sapiens	TPR		R-HSA-170796
R-HSA-936837	Ion transport by P-type ATPases	2	71	0.00507759	0.799456	0.799456	3	14	0.00118765	9606	Homo sapiens	SRI;ATP9A		R-HSA-427910;R-HSA-947591;R-HSA-939763
R-HSA-2559586	DNA Damage/Telomere Stress Induced Senescence	2	71	0.00507759	0.799456	0.799456	3	18	0.00152698	9606	Homo sapiens	CDK2;TPP1		R-HSA-3785711;R-HSA-69562;R-HSA-187934
R-HSA-983170	Antigen Presentation: Folding, assembly and peptide loading of class I MHC	3	102	0.00729457	0.802344	0.802344	5	16	0.00135731	9606	Homo sapiens	SEC13;SEC23A;SEC24C		R-HSA-983422;R-HSA-203979;R-HSA-983426;R-HSA-983425;R-HSA-983424
R-HSA-354192	Integrin alphaIIb beta3 signaling	1	39	0.0027891	0.806462	0.806462	20	24	0.00203597	9606	Homo sapiens	TLN1		R-HSA-354149;R-HSA-443910;R-HSA-429415;R-HSA-354087;R-HSA-372705;R-HSA-432096;R-HSA-443905;R-HSA-429441;R-HSA-377644;R-HSA-354124;R-HSA-377641;R-HSA-377640;R-HSA-377643;R-HSA-372693;R-HSA-354165;R-HSA-354097;R-HSA-354066;R-HSA-354077;R-HSA-372697;R-HSA-354073
R-HSA-9006921	Integrin signaling	1	39	0.0027891	0.806462	0.806462	20	24	0.00203597	9606	Homo sapiens	TLN1		R-HSA-354149;R-HSA-443910;R-HSA-429415;R-HSA-354087;R-HSA-372705;R-HSA-432096;R-HSA-443905;R-HSA-429441;R-HSA-377644;R-HSA-354124;R-HSA-377641;R-HSA-377640;R-HSA-377643;R-HSA-372693;R-HSA-354165;R-HSA-354097;R-HSA-354066;R-HSA-354077;R-HSA-372697;R-HSA-354073
R-HSA-5685938	HDR through Single Strand Annealing (SSA)	1	39	0.0027891	0.806462	0.806462	4	6	0.000509	9606	Homo sapiens	RPA1		R-HSA-5686642;R-HSA-5686657;R-HSA-5693564;R-HSA-5693580
R-HSA-5654726	Negative regulation of FGFR1 signaling	1	39	0.0027891	0.806462	0.806462	7	15	0.00127248	9606	Homo sapiens	PPP2R1A		R-HSA-934559;R-HSA-1295632;R-HSA-1295622;R-HSA-1295609;R-HSA-1549564;R-HSA-1295599;R-HSA-1295613
R-HSA-180746	Nuclear import of Rev protein	1	39	0.0027891	0.806462	0.806462	2	7	0.000594	9606	Homo sapiens	TPR		R-HSA-180710;R-HSA-180732
R-HSA-399721	Glutamate binding, activation of AMPA receptors and synaptic plasticity	1	39	0.0027891	0.806462	0.806462	2	9	0.000763	9606	Homo sapiens	PRKACA		R-HSA-421007;R-HSA-416639
R-HSA-5357905	Regulation of TNFR1 signaling	1	39	0.0027891	0.806462	0.806462	1	14	0.00118765	9606	Homo sapiens	GNB2L1		R-HSA-5626962
R-HSA-189451	Heme biosynthesis	1	39	0.0027891	0.806462	0.806462	1	16	0.00135731	9606	Homo sapiens	PPOX		R-HSA-189423
R-HSA-5609975	Diseases associated with glycosylation precursor biosynthesis	1	39	0.0027891	0.806462	0.806462	1	16	0.00135731	9606	Homo sapiens	PGM1		R-HSA-5609939
R-HSA-212436	Generic Transcription Pathway	55	1454	0.103983	0.814385	0.814385	106	726	0.0615881	9606	Homo sapiens	GPI;CCNT1;CHD3;PSMD8;MED12;TRIM28;PSMD5;PPP2R1A;TNKS1BP1;NELFCD;PRKACA;TEAD1;PRMT5;SMARCC1;SUPT16H;PARP1;GTF2F1;MED27;ARID1B;DDB2;NCOR2;PSMA6;NCOR1;PSMA4;TBL1XR1;PSMA2;SMARCD1;PSMD11;TXN;PSMA7;PRDX2;PSMB5;PRDX1;PSMB1;ZKSCAN1;TFAP2A;SURF1;CBX5;BRPF1;TXNRD1;RPA1;SSRP1;SUPT5H;MTOR;CDK9;CDK2;AGO2;DRG1;CDK1;TCEA1		R-HSA-8951695;R-HSA-9009282;R-HSA-8864395;R-HSA-8936068;R-HSA-3234081;R-HSA-6805109;R-HSA-6805620;R-HSA-8864412;R-HSA-2187325;R-HSA-187934;R-HSA-9615501;R-HSA-8869543;R-HSA-8869542;R-HSA-6805061;R-HSA-6805059;R-HSA-8864431;R-HSA-8869549;R-HSA-3341343;R-HSA-8864426;R-HSA-8864936;R-HSA-8935864;R-HSA-8869558;R-HSA-8864690;R-HSA-8864433;R-HSA-380979;R-HSA-8869566;R-HSA-8864698;R-HSA-8869560;R-HSA-886…
R-HSA-2408508	Metabolism of ingested SeMet, Sec, MeSec into H2Se	1	40	0.00286062	0.814454	0.814454	1	10	0.000848	9606	Homo sapiens	AHCY		R-HSA-2408532
R-HSA-5654727	Negative regulation of FGFR2 signaling	1	41	0.00293213	0.822116	0.822116	7	14	0.00118765	9606	Homo sapiens	PPP2R1A		R-HSA-934559;R-HSA-1295632;R-HSA-1295622;R-HSA-1295609;R-HSA-1549564;R-HSA-1295599;R-HSA-1295613
R-HSA-3232142	SUMOylation of ubiquitinylation proteins	1	41	0.00293213	0.822116	0.822116	1	3	0.000254	9606	Homo sapiens	TPR		R-HSA-5228523
R-HSA-5693616	Presynaptic phase of homologous DNA pairing and strand exchange	1	41	0.00293213	0.822116	0.822116	1	5	0.000424	9606	Homo sapiens	RPA1		R-HSA-5693561
R-HSA-392518	Signal amplification	1	42	0.00300365	0.829463	0.829463	12	18	0.00152698	9606	Homo sapiens	GNB4		R-HSA-428918;R-HSA-428917;R-HSA-418581;R-HSA-418579;R-HSA-428752;R-HSA-418576;R-HSA-392195;R-HSA-428750;R-HSA-428909;R-HSA-428749;R-HSA-392187;R-HSA-392202
R-HSA-180910	Vpr-mediated nuclear import of PICs	1	42	0.00300365	0.829463	0.829463	1	2	0.00017	9606	Homo sapiens	TPR		R-HSA-180622
R-HSA-6783310	Fanconi Anemia Pathway	1	42	0.00300365	0.829463	0.829463	2	13	0.00110282	9606	Homo sapiens	RPA1		R-HSA-6788385;R-HSA-6788392
R-HSA-1368108	BMAL1:CLOCK,NPAS2 activates circadian gene expression	1	42	0.00300365	0.829463	0.829463	1	20	0.00169664	9606	Homo sapiens	TBL1XR1		R-HSA-879724
R-HSA-3296482	Defects in vitamin and cofactor metabolism	1	42	0.00300365	0.829463	0.829463	1	22	0.0018663	9606	Homo sapiens	PC		R-HSA-9035988
R-HSA-8964043	Plasma lipoprotein clearance	1	42	0.00300365	0.829463	0.829463	1	35	0.00296912	9606	Homo sapiens	HDLBP		R-HSA-8858252
R-HSA-193704	p75 NTR receptor-mediated signalling	3	108	0.00772366	0.832119	0.832119	5	50	0.0042416	9606	Homo sapiens	TRIO;ARHGDIA;ARHGEF2		R-HSA-9012761;R-HSA-193696;R-HSA-193668;R-HSA-205039;R-HSA-193646
R-HSA-432720	Lysosome Vesicle Biogenesis	1	43	0.00307516	0.836506	0.836506	2	8	0.000679	9606	Homo sapiens	DNM2		R-HSA-432706;R-HSA-432707
R-HSA-114604	GPVI-mediated activation cascade	1	43	0.00307516	0.836506	0.836506	5	25	0.0021208	9606	Homo sapiens	FYN		R-HSA-139842;R-HSA-453200;R-HSA-437118;R-HSA-114600;R-HSA-453183
R-HSA-193775	Synthesis of bile acids and bile salts via 24-hydroxycholesterol	1	43	0.00307516	0.836506	0.836506	2	28	0.0023753	9606	Homo sapiens	AMACR		R-HSA-193763;R-HSA-193736
R-HSA-5689896	Ovarian tumor domain proteases	1	43	0.00307516	0.836506	0.836506	1	14	0.00118765	9606	Homo sapiens	CDK1		R-HSA-8940100
R-HSA-8957275	Post-translational protein phosphorylation	3	109	0.00779518	0.836689	0.836689	1	1	8.48e-05	9606	Homo sapiens	LAMC1;FSTL1;KTN1		R-HSA-8952289
R-HSA-8856825	Cargo recognition for clathrin-mediated endocytosis	3	109	0.00779518	0.836689	0.836689	3	14	0.00118765	9606	Homo sapiens	COPS4;COPS2;NEDD8		R-HSA-8863727;R-HSA-8863723;R-HSA-8863721
R-HSA-159231	Transport of Mature mRNA Derived from an Intronless Transcript	1	44	0.00314668	0.84326	0.84326	3	3	0.000254	9606	Homo sapiens	TPR		R-HSA-158441;R-HSA-77594;R-HSA-158447
R-HSA-1839124	FGFR1 mutant receptor activation	1	44	0.00314668	0.84326	0.84326	7	25	0.0021208	9606	Homo sapiens	TRIM24		R-HSA-1839039;R-HSA-1839112;R-HSA-1839080;R-HSA-1839065;R-HSA-1839078;R-HSA-1839031;R-HSA-1839091
R-HSA-196757	Metabolism of folate and pterines	1	44	0.00314668	0.84326	0.84326	5	29	0.00246013	9606	Homo sapiens	MTHFD1		R-HSA-200711;R-HSA-200661;R-HSA-200644;R-HSA-200740;R-HSA-200718
R-HSA-168276	NS1 Mediated Effects on Host Pathways	1	44	0.00314668	0.84326	0.84326	1	6	0.000509	9606	Homo sapiens	TPR		R-HSA-1176059
R-HSA-3769402	Deactivation of the beta-catenin transactivating complex	1	44	0.00314668	0.84326	0.84326	2	14	0.00118765	9606	Homo sapiens	XPO1		R-HSA-3769391;R-HSA-3769392
R-HSA-5693579	Homologous DNA Pairing and Strand Exchange	1	44	0.00314668	0.84326	0.84326	1	8	0.000679	9606	Homo sapiens	RPA1		R-HSA-5693561
R-HSA-74217	Purine salvage	1	44	0.00314668	0.84326	0.84326	1	11	0.000933	9606	Homo sapiens	HPRT1		R-HSA-74215
R-HSA-72203	Processing of Capped Intron-Containing Pre-mRNA	8	256	0.0183079	0.843416	0.843416	31	32	0.00271463	9606	Homo sapiens	GPKOW;DDX46;PRCC;TPR;SRSF2;UPF3B;GTF2F1;SRSF11		R-HSA-8849157;R-HSA-72130;R-HSA-159046;R-HSA-75079;R-HSA-75081;R-HSA-159050;R-HSA-75080;R-HSA-72139;R-HSA-75083;R-HSA-75082;R-HSA-72143;R-HSA-111439;R-HSA-77587;R-HSA-158481;R-HSA-158484;R-HSA-75097;R-HSA-75096;R-HSA-75098;R-HSA-77594;R-HSA-72095;R-HSA-72160;R-HSA-72103;R-HSA-72107;R-HSA-158441;R-HSA-158447;R-HSA-72180;R-HSA-156661;R-HSA-72185;R-HSA-72124;R-HSA-72127;R-HSA-159101
R-HSA-5578749	Transcriptional regulation by small RNAs	2	79	0.00564972	0.844851	0.844851	5	5	0.000424	9606	Homo sapiens	AGO2;TPR		R-HSA-5578965;R-HSA-5578966;R-HSA-5578742;R-HSA-5578744;R-HSA-5578712
R-HSA-1632852	Macroautophagy	2	79	0.00564972	0.844851	0.844851	6	39	0.00330845	9606	Homo sapiens	ATG9A;MTOR		R-HSA-5682385;R-HSA-5672017;R-HSA-5672817;R-HSA-5675790;R-HSA-5672010;R-HSA-5673768
R-HSA-75105	Fatty acyl-CoA biosynthesis	2	79	0.00564972	0.844851	0.844851	2	24	0.00203597	9606	Homo sapiens	ACLY;FEN1		R-HSA-548814;R-HSA-75848
R-HSA-159234	Transport of Mature mRNAs Derived from Intronless Transcripts	1	45	0.00321819	0.849734	0.849734	9	9	0.000763	9606	Homo sapiens	TPR		R-HSA-77587;R-HSA-158481;R-HSA-159046;R-HSA-158484;R-HSA-159050;R-HSA-158441;R-HSA-77594;R-HSA-158447;R-HSA-111439
R-HSA-6785470	tRNA processing in the mitochondrion	1	45	0.00321819	0.849734	0.849734	1	3	0.000254	9606	Homo sapiens	TRNT1		R-HSA-6786881
R-HSA-202427	Phosphorylation of CD3 and TCR zeta chains	1	45	0.00321819	0.849734	0.849734	2	7	0.000594	9606	Homo sapiens	PTPRJ		R-HSA-202214;R-HSA-202233
R-HSA-176033	Interactions of Vpr with host cellular proteins	1	45	0.00321819	0.849734	0.849734	1	4	0.000339	9606	Homo sapiens	TPR		R-HSA-180622
R-HSA-5625740	RHO GTPases activate PKNs	2	80	0.00572123	0.849819	0.849819	3	20	0.00169664	9606	Homo sapiens	SET;PKN2		R-HSA-5623622;R-HSA-5623632;R-HSA-5623667
R-HSA-204998	Cell death signalling via NRAGE, NRIF and NADE	2	80	0.00572123	0.849819	0.849819	1	17	0.00144214	9606	Homo sapiens	TRIO;ARHGEF2		R-HSA-205039
R-HSA-212165	Epigenetic regulation of gene expression	4	143	0.0102267	0.851349	0.851349	9	34	0.00288429	9606	Homo sapiens	CAST;RPA1;ARID4B;CHD3		R-HSA-427366;R-HSA-5250930;R-HSA-5250947;R-HSA-427409;R-HSA-5250938;R-HSA-427404;R-HSA-5227490;R-HSA-433672;R-HSA-427336
R-HSA-194840	Rho GTPase cycle	4	144	0.0102982	0.855037	0.855037	3	5	0.000424	9606	Homo sapiens	TRIO;ARHGDIA;GDI2;ARHGEF2		R-HSA-194913;R-HSA-194854;R-HSA-195146
R-HSA-168271	Transport of Ribonucleoproteins into the Host Nucleus	1	46	0.00328971	0.855942	0.855942	1	4	0.000339	9606	Homo sapiens	TPR		R-HSA-168337
R-HSA-749476	RNA Polymerase III Abortive And Retractive Initiation	1	46	0.00328971	0.855942	0.855942	1	13	0.00110282	9606	Homo sapiens	SSB		R-HSA-113454
R-HSA-74158	RNA Polymerase III Transcription	1	46	0.00328971	0.855942	0.855942	1	25	0.0021208	9606	Homo sapiens	SSB		R-HSA-113454
R-HSA-5579029	Metabolic disorders of biological oxidation enzymes	2	82	0.00586426	0.859322	0.859322	2	39	0.00330845	9606	Homo sapiens	AHCY;CPS1		R-HSA-5579084;R-HSA-5579081
R-HSA-917937	Iron uptake and transport	2	83	0.00593578	0.863864	0.863864	3	34	0.00288429	9606	Homo sapiens	CAND1;NEDD8		R-HSA-5691108;R-HSA-5691131;R-HSA-5691176
R-HSA-5633008	TP53 Regulates Transcription of Cell Death Genes	2	83	0.00593578	0.863864	0.863864	2	68	0.00576858	9606	Homo sapiens	DRG1		R-HSA-5633314;R-HSA-5633295
R-HSA-427389	ERCC6 (CSB) and EHMT2 (G9a) positively regulate rRNA expression	1	48	0.00343274	0.867599	0.867599	2	4	0.000339	9606	Homo sapiens	CHD3		R-HSA-427404;R-HSA-427336
R-HSA-4615885	SUMOylation of DNA replication proteins	1	48	0.00343274	0.867599	0.867599	2	8	0.000679	9606	Homo sapiens	TPR		R-HSA-5228525;R-HSA-4655355
R-HSA-69236	G1 Phase	1	48	0.00343274	0.867599	0.867599	2	14	0.00118765	9606	Homo sapiens	PPP2R1A		R-HSA-1363276;R-HSA-1363274
R-HSA-69231	Cyclin D associated events in G1	1	48	0.00343274	0.867599	0.867599	2	14	0.00118765	9606	Homo sapiens	PPP2R1A		R-HSA-1363276;R-HSA-1363274
R-HSA-168253	Host Interactions with Influenza Factors	1	48	0.00343274	0.867599	0.867599	1	8	0.000679	9606	Homo sapiens	TPR		R-HSA-1176059
R-HSA-1839126	FGFR2 mutant receptor activation	1	48	0.00343274	0.867599	0.867599	1	18	0.00152698	9606	Homo sapiens	GTF2F1		R-HSA-8851710
R-HSA-4570464	SUMOylation of RNA binding proteins	1	49	0.00350425	0.87307	0.87307	1	4	0.000339	9606	Homo sapiens	TPR		R-HSA-4570493
R-HSA-5654743	Signaling by FGFR4	1	50	0.00357577	0.878315	0.878315	7	41	0.00347811	9606	Homo sapiens	PPP2R1A		R-HSA-934559;R-HSA-1295632;R-HSA-1295622;R-HSA-1295609;R-HSA-1549564;R-HSA-1295599;R-HSA-1295613
R-HSA-75893	TNF signaling	1	50	0.00357577	0.878315	0.878315	4	29	0.00246013	9606	Homo sapiens	GNB2L1		R-HSA-5626981;R-HSA-5357776;R-HSA-5626982;R-HSA-5626962
R-HSA-71403	Citric acid cycle (TCA cycle)	1	50	0.00357577	0.878315	0.878315	1	17	0.00144214	9606	Homo sapiens	NNT		R-HSA-450971
R-HSA-2151201	Transcriptional activation of mitochondrial biogenesis	2	87	0.00622184	0.88072	0.88072	2	32	0.00271463	9606	Homo sapiens	NCOR1;TBL1XR1		R-HSA-1592238;R-HSA-1368140
R-HSA-168898	Toll-like Receptor Cascades	5	183	0.0130873	0.883159	0.883159	15	180	0.0152698	9606	Homo sapiens	PPP2R1A;UBE2N;HMGB1;UBE2V1;DNM2		R-HSA-975118;R-HSA-6804100;R-HSA-168166;R-HSA-6804099;R-HSA-450337;R-HSA-5432825;R-HSA-2201293;R-HSA-450346;R-HSA-9014342;R-HSA-168915;R-HSA-199959;R-HSA-937050;R-HSA-168184;R-HSA-6805981;R-HSA-975122
R-HSA-75876	Synthesis of very long-chain fatty acyl-CoAs	1	51	0.00364729	0.883344	0.883344	1	12	0.00101798	9606	Homo sapiens	FEN1		R-HSA-548814
R-HSA-2172127	DAP12 interactions	1	52	0.0037188	0.888165	0.888165	10	33	0.00279946	9606	Homo sapiens	FYN		R-HSA-2395412;R-HSA-2424484;R-HSA-210289;R-HSA-2424486;R-HSA-2424487;R-HSA-2424480;R-HSA-2396594;R-HSA-2424482;R-HSA-2395439;R-HSA-2395801
R-HSA-5654741	Signaling by FGFR3	1	52	0.0037188	0.888165	0.888165	7	43	0.00364778	9606	Homo sapiens	PPP2R1A		R-HSA-934559;R-HSA-1295632;R-HSA-1295622;R-HSA-1295609;R-HSA-1549564;R-HSA-1295599;R-HSA-1295613
R-HSA-2142691	Synthesis of Leukotrienes (LT) and Eoxins (EX)	1	52	0.0037188	0.888165	0.888165	1	19	0.00161181	9606	Homo sapiens	LTA4H		R-HSA-266072
R-HSA-109606	Intrinsic Pathway for Apoptosis	1	52	0.0037188	0.888165	0.888165	1	47	0.00398711	9606	Homo sapiens	NMT1		R-HSA-141367
R-HSA-2559582	Senescence-Associated Secretory Phenotype (SASP)	2	89	0.00636487	0.888406	0.888406	6	22	0.0018663	9606	Homo sapiens	ANAPC7;CDK2		R-HSA-3790137;R-HSA-3788705;R-HSA-3790130;R-HSA-3788725;R-HSA-3788724;R-HSA-3788708
R-HSA-1226099	Signaling by FGFR in disease	2	89	0.00636487	0.888406	0.888406	11	106	0.00899219	9606	Homo sapiens	TRIM24;GTF2F1		R-HSA-1839100;R-HSA-1839039;R-HSA-1839112;R-HSA-1839080;R-HSA-1839065;R-HSA-1839098;R-HSA-8851710;R-HSA-1839094;R-HSA-1839078;R-HSA-1839031;R-HSA-1839091
R-HSA-76009	Platelet Aggregation (Plug Formation)	1	53	0.00379032	0.892787	0.892787	20	27	0.00229047	9606	Homo sapiens	TLN1		R-HSA-354149;R-HSA-443910;R-HSA-429415;R-HSA-354087;R-HSA-372705;R-HSA-432096;R-HSA-443905;R-HSA-429441;R-HSA-377644;R-HSA-354124;R-HSA-377641;R-HSA-377640;R-HSA-377643;R-HSA-372693;R-HSA-354165;R-HSA-354097;R-HSA-354066;R-HSA-354077;R-HSA-372697;R-HSA-354073
R-HSA-5655302	Signaling by FGFR1 in disease	1	53	0.00379032	0.892787	0.892787	10	35	0.00296912	9606	Homo sapiens	TRIM24		R-HSA-1839100;R-HSA-1839039;R-HSA-1839112;R-HSA-1839080;R-HSA-1839065;R-HSA-1839098;R-HSA-1839094;R-HSA-1839078;R-HSA-1839031;R-HSA-1839091
R-HSA-73887	Death Receptor Signalling	4	157	0.0112279	0.8963	0.8963	9	90	0.00763488	9606	Homo sapiens	TRIO;ARHGDIA;ARHGEF2;GNB2L1		R-HSA-5626981;R-HSA-9012761;R-HSA-5357776;R-HSA-193696;R-HSA-5626982;R-HSA-193668;R-HSA-5626962;R-HSA-205039;R-HSA-193646
R-HSA-189445	Metabolism of porphyrins	1	54	0.00386183	0.897219	0.897219	1	21	0.00178147	9606	Homo sapiens	PPOX		R-HSA-189423
R-HSA-381426	Regulation of Insulin-like Growth Factor (IGF) transport and uptake by Insulin-like Growth Factor Binding Proteins (IGFBPs)	3	127	0.00908246	0.902287	0.902287	1	14	0.00118765	9606	Homo sapiens	LAMC1;FSTL1;KTN1		R-HSA-8952289
R-HSA-6794362	Protein-protein interactions at synapses	2	93	0.00665093	0.902419	0.902419	2	33	0.00279946	9606	Homo sapiens	PPFIBP1;PDLIM5		R-HSA-6794354;R-HSA-388824
R-HSA-1614635	Sulfur amino acid metabolism	2	94	0.00672245	0.905656	0.905656	2	37	0.00313878	9606	Homo sapiens	AHCY;GOT1		R-HSA-174401;R-HSA-1237102
R-HSA-2029480	Fcgamma receptor (FCGR) dependent phagocytosis	5	193	0.0138025	0.908349	0.908349	5	42	0.00356295	9606	Homo sapiens	HSP90AA1;AHCYL1;CFL1;FYN		R-HSA-169683;R-HSA-399950;R-HSA-419644;R-HSA-419645;R-HSA-2029459
R-HSA-5693571	Nonhomologous End-Joining (NHEJ)	1	57	0.00407638	0.909446	0.909446	4	13	0.00110282	9606	Homo sapiens	UBE2N		R-HSA-5686900;R-HSA-5686704;R-HSA-5693599;R-HSA-5686685
R-HSA-2162123	Synthesis of Prostaglandins (PG) and Thromboxanes (TX)	1	58	0.00414789	0.91319	0.91319	1	32	0.00271463	9606	Homo sapiens	CBR1		R-HSA-2161651
R-HSA-197264	Nicotinamide salvaging	1	59	0.00421941	0.91678	0.91678	1	12	0.00101798	9606	Homo sapiens	PKM		R-HSA-8938073
R-HSA-1428517	The citric acid (TCA) cycle and respiratory electron transport	6	229	0.016377	0.919266	0.919266	6	65	0.00551408	9606	Homo sapiens	LDHB;LDHA;SURF1;NNT;GLO1		R-HSA-5694071;R-HSA-6807826;R-HSA-71849;R-HSA-163214;R-HSA-450971;R-HSA-70510
R-HSA-6794361	Neurexins and neuroligins	1	60	0.00429093	0.920221	0.920221	1	19	0.00161181	9606	Homo sapiens	PDLIM5		R-HSA-6794354
R-HSA-4085001	Sialic acid metabolism	1	60	0.00429093	0.920221	0.920221	1	20	0.00169664	9606	Homo sapiens	ANP32B		R-HSA-4084976
R-HSA-2187338	Visual phototransduction	4	168	0.0120146	0.922768	0.922768	3	90	0.00763488	9606	Homo sapiens	NMT1;PRKACA;METAP2		R-HSA-2534087;R-HSA-2534096;R-HSA-74615
R-HSA-1236394	Signaling by ERBB4	1	61	0.00436244	0.92352	0.92352	6	37	0.00313878	9606	Homo sapiens	NCOR1		R-HSA-8954185;R-HSA-1253319;R-HSA-1253321;R-HSA-8954179;R-HSA-8954182;R-HSA-1253325
R-HSA-5654736	Signaling by FGFR1	1	61	0.00436244	0.92352	0.92352	7	48	0.00407194	9606	Homo sapiens	PPP2R1A		R-HSA-934559;R-HSA-1295632;R-HSA-1295622;R-HSA-1295609;R-HSA-1549564;R-HSA-1295599;R-HSA-1295613
R-HSA-400253	Circadian Clock	2	101	0.00722306	0.925653	0.925653	13	59	0.00500509	9606	Homo sapiens	NCOR1;TBL1XR1		R-HSA-879724;R-HSA-5663252;R-HSA-1368119;R-HSA-1801587;R-HSA-549475;R-HSA-5663258;R-HSA-400342;R-HSA-1368069;R-HSA-5663271;R-HSA-1368065;R-HSA-5663265;R-HSA-1368140;R-HSA-5663245
R-HSA-5655253	Signaling by FGFR2 in disease	1	62	0.00443396	0.926683	0.926683	1	28	0.0023753	9606	Homo sapiens	GTF2F1		R-HSA-8851710
R-HSA-8935690	Digestion	1	63	0.00450547	0.929715	0.929715	1	24	0.00203597	9606	Homo sapiens	ALPP		R-HSA-8878787
R-HSA-983695	Antigen activates B Cell Receptor (BCR) leading to generation of second messengers	2	103	0.00736609	0.930588	0.930588	2	25	0.0021208	9606	Homo sapiens	AHCYL1;FYN		R-HSA-169683;R-HSA-983709
R-HSA-112314	Neurotransmitter receptors and postsynaptic signal transmission	4	173	0.0123722	0.93266	0.93266	4	58	0.00492026	9606	Homo sapiens	GNB4;PRKACA		R-HSA-421007;R-HSA-416639;R-HSA-500717;R-HSA-111919
R-HSA-5621480	Dectin-2 family	1	65	0.0046485	0.93541	0.93541	1	12	0.00101798	9606	Homo sapiens	FYN		R-HSA-5621355
R-HSA-1483166	Synthesis of PA	1	65	0.0046485	0.93541	0.93541	1	17	0.00144214	9606	Homo sapiens	ALPP		R-HSA-8878787
R-HSA-5693565	Recruitment and ATM-mediated phosphorylation of repair and signaling proteins at DNA double strand breaks	1	66	0.00472002	0.938082	0.938082	13	35	0.00296912	9606	Homo sapiens	UBE2N		R-HSA-5683735;R-HSA-69891;R-HSA-5693566;R-HSA-5683384;R-HSA-5683801;R-HSA-5683385;R-HSA-5682629;R-HSA-5683077;R-HSA-5683425;R-HSA-5682863;R-HSA-5693551;R-HSA-5683405;R-HSA-5682858
R-HSA-8978934	Metabolism of cofactors	1	66	0.00472002	0.938082	0.938082	2	27	0.00229047	9606	Homo sapiens	HSP90AA1		R-HSA-1497796;R-HSA-1497784
R-HSA-9033241	Peroxisomal protein import	1	67	0.00479153	0.940643	0.940643	3	26	0.00220563	9606	Homo sapiens	AMACR		R-HSA-9033233;R-HSA-9033235;R-HSA-9033236
R-HSA-201722	Formation of the beta-catenin:TCF transactivating complex	1	67	0.00479153	0.940643	0.940643	1	13	0.00110282	9606	Homo sapiens	CDC73		R-HSA-3322424
R-HSA-9006927	Signaling by Non-Receptor Tyrosine Kinases	1	67	0.00479153	0.940643	0.940643	2	52	0.00441127	9606	Homo sapiens	CDK2		R-HSA-8848436;R-HSA-8848414
R-HSA-8848021	Signaling by PTK6	1	67	0.00479153	0.940643	0.940643	2	52	0.00441127	9606	Homo sapiens	CDK2		R-HSA-8848436;R-HSA-8848414
R-HSA-2022090	Assembly of collagen fibrils and other multimeric structures	1	67	0.00479153	0.940643	0.940643	1	26	0.00220563	9606	Homo sapiens	DST		R-HSA-2213192
R-HSA-8873719	RAB geranylgeranylation	1	68	0.00486305	0.943099	0.943099	2	5	0.000424	9606	Homo sapiens	PTP4A2		R-HSA-8870461;R-HSA-8870457
R-HSA-2428928	IRS-related events triggered by IGF1R	1	68	0.00486305	0.943099	0.943099	2	11	0.000933	9606	Homo sapiens	IGF1R		R-HSA-2428930;R-HSA-2428922
R-HSA-8956321	Nucleotide salvage	1	68	0.00486305	0.943099	0.943099	1	21	0.00178147	9606	Homo sapiens	HPRT1		R-HSA-74215
R-HSA-375165	NCAM signaling for neurite out-growth	1	69	0.00493456	0.945454	0.945454	8	23	0.00195114	9606	Homo sapiens	FYN		R-HSA-392053;R-HSA-392054;R-HSA-392051;R-HSA-391868;R-HSA-391871;R-HSA-391865;R-HSA-391867;R-HSA-391866
R-HSA-1474228	Degradation of the extracellular matrix	3	148	0.0105843	0.948152	0.948152	2	105	0.00890736	9606	Homo sapiens	CAST;LAMA5;LAMC1		R-HSA-2533874;R-HSA-8848658
R-HSA-2428924	IGF1R signaling cascade	1	71	0.00507759	0.949875	0.949875	5	16	0.00135731	9606	Homo sapiens	IGF1R		R-HSA-2404193;R-HSA-2404195;R-HSA-2428930;R-HSA-5686072;R-HSA-2428922
R-HSA-6790901	rRNA modification in the nucleus and cytosol	1	71	0.00507759	0.949875	0.949875	1	8	0.000679	9606	Homo sapiens	TRMT112		R-HSA-6790982
R-HSA-8963743	Digestion and absorption	1	71	0.00507759	0.949875	0.949875	1	30	0.00254496	9606	Homo sapiens	ALPP		R-HSA-8878787
R-HSA-2404192	Signaling by Type 1 Insulin-like Growth Factor 1 Receptor (IGF1R)	1	72	0.00514911	0.951949	0.951949	7	18	0.00152698	9606	Homo sapiens	IGF1R		R-HSA-2404199;R-HSA-2404193;R-HSA-2404195;R-HSA-2428930;R-HSA-2404200;R-HSA-5686072;R-HSA-2428922
R-HSA-5693606	DNA Double Strand Break Response	1	74	0.00529214	0.955845	0.955845	13	44	0.00373261	9606	Homo sapiens	UBE2N		R-HSA-5683735;R-HSA-69891;R-HSA-5693566;R-HSA-5683384;R-HSA-5683801;R-HSA-5683385;R-HSA-5682629;R-HSA-5683077;R-HSA-5683425;R-HSA-5682863;R-HSA-5693551;R-HSA-5683405;R-HSA-5682858
R-HSA-74259	Purine catabolism	1	74	0.00529214	0.955845	0.955845	3	28	0.0023753	9606	Homo sapiens	ITPA		R-HSA-2509831;R-HSA-2509827;R-HSA-2509838
R-HSA-913709	O-linked glycosylation of mucins	1	74	0.00529214	0.955845	0.955845	1	17	0.00144214	9606	Homo sapiens	GALNT1		R-HSA-913675
R-HSA-3906995	Diseases associated with O-glycosylation of proteins	1	76	0.00543517	0.959425	0.959425	3	9	0.000763	9606	Homo sapiens	DAG1		R-HSA-5615556;R-HSA-5615604;R-HSA-5617096
R-HSA-193368	Synthesis of bile acids and bile salts via 7alpha-hydroxycholesterol	1	76	0.00543517	0.959425	0.959425	2	39	0.00330845	9606	Homo sapiens	AMACR		R-HSA-192056;R-HSA-193452
R-HSA-1834949	Cytosolic sensors of pathogen-associated DNA	1	77	0.00550669	0.961105	0.961105	3	48	0.00407194	9606	Homo sapiens	TREX1		R-HSA-1834939;R-HSA-3245943;R-HSA-3244605
R-HSA-2029482	Regulation of actin dynamics for phagocytic cup formation	3	158	0.0112994	0.962071	0.962071	3	24	0.00203597	9606	Homo sapiens	HSP90AA1;CFL1		R-HSA-399950;R-HSA-419644;R-HSA-419645
R-HSA-6811558	PI5P, PP2A and IER3 Regulate PI3K/AKT Signaling	2	122	0.00872488	0.964284	0.964284	5	7	0.000594	9606	Homo sapiens	PPP2R1A;FYN		R-HSA-2316434;R-HSA-8857925;R-HSA-6811472;R-HSA-6811504;R-HSA-6811454
R-HSA-5663084	Diseases of carbohydrate metabolism	1	80	0.00572123	0.965739	0.965739	2	44	0.00373261	9606	Homo sapiens	TALDO1		R-HSA-5659989;R-HSA-5659998
R-HSA-2559583	Cellular Senescence	4	198	0.0141601	0.966935	0.966935	10	89	0.00755005	9606	Homo sapiens	ANAPC7;CDK2;TPP1;TXN		R-HSA-3790137;R-HSA-3785711;R-HSA-3788705;R-HSA-3225851;R-HSA-3790130;R-HSA-69562;R-HSA-3788725;R-HSA-187934;R-HSA-3788724;R-HSA-3788708
R-HSA-1592230	Mitochondrial biogenesis	2	127	0.00908246	0.97011	0.97011	2	36	0.00305395	9606	Homo sapiens	NCOR1;TBL1XR1		R-HSA-1592238;R-HSA-1368140
R-HSA-199418	Negative regulation of the PI3K/AKT network	2	130	0.009297	0.973154	0.973154	5	10	0.000848	9606	Homo sapiens	PPP2R1A;FYN		R-HSA-2316434;R-HSA-8857925;R-HSA-6811472;R-HSA-6811504;R-HSA-6811454
R-HSA-2219528	PI3K/AKT Signaling in Cancer	2	130	0.009297	0.973154	0.973154	2	21	0.00178147	9606	Homo sapiens	FYN;MTOR		R-HSA-2243938;R-HSA-2400009
R-HSA-196807	Nicotinate metabolism	1	86	0.00615032	0.973419	0.973419	1	29	0.00246013	9606	Homo sapiens	PKM		R-HSA-8938073
R-HSA-5173105	O-linked glycosylation	2	133	0.00951155	0.975898	0.975898	6	26	0.00220563	9606	Homo sapiens	GALNT1;DAG1		R-HSA-5615637;R-HSA-913675;R-HSA-5617037;R-HSA-8931648;R-HSA-8879117;R-HSA-8931653
R-HSA-1912408	Pre-NOTCH Transcription and Translation	1	89	0.00636487	0.976588	0.976588	13	28	0.0023753	9606	Homo sapiens	AGO2		R-HSA-1912413;R-HSA-1912412;R-HSA-1606682;R-HSA-1912409;R-HSA-1912410;R-HSA-1912406;R-HSA-1912368;R-HSA-1912364;R-HSA-1912367;R-HSA-1912366;R-HSA-1912363;R-HSA-1912362;R-HSA-1606561
R-HSA-9018677	Biosynthesis of DHA-derived SPMs	1	89	0.00636487	0.976588	0.976588	6	58	0.00492026	9606	Homo sapiens	LTA4H		R-HSA-9024890;R-HSA-9020253;R-HSA-9020252;R-HSA-9020270;R-HSA-9020257;R-HSA-9020258
R-HSA-390918	Peroxisomal lipid metabolism	1	90	0.00643639	0.977558	0.977558	1	35	0.00296912	9606	Homo sapiens	AMACR		R-HSA-389897
R-HSA-5576891	Cardiac conduction	3	175	0.0125152	0.978008	0.978008	7	26	0.00220563	9606	Homo sapiens	AHCYL1;SRI;PRKACA		R-HSA-427910;R-HSA-169683;R-HSA-5226904;R-HSA-2855020;R-HSA-425661;R-HSA-5617182;R-HSA-5617179
R-HSA-8876198	RAB GEFs exchange GTP for GDP on RABs	1	94	0.00672245	0.981054	0.981054	18	21	0.00178147	9606	Homo sapiens	GDI2		R-HSA-8876615;R-HSA-8876454;R-HSA-8876837;R-HSA-8877475;R-HSA-8876193;R-HSA-8877760;R-HSA-8877998;R-HSA-8877612;R-HSA-8877451;R-HSA-8876616;R-HSA-8875318;R-HSA-8877813;R-HSA-8876191;R-HSA-8877311;R-HSA-8876190;R-HSA-8876188;R-HSA-8877308;R-HSA-8875320
R-HSA-6806667	Metabolism of fat-soluble vitamins	1	94	0.00672245	0.981054	0.981054	2	34	0.00288429	9606	Homo sapiens	TPP1		R-HSA-8874705;R-HSA-8874718
R-HSA-5668914	Diseases of metabolism	4	217	0.0155188	0.981225	0.981225	5	114	0.00967085	9606	Homo sapiens	AHCY;PC;CPS1;TALDO1		R-HSA-5659989;R-HSA-5659998;R-HSA-5579084;R-HSA-5579081;R-HSA-9035988
R-HSA-168928	DDX58/IFIH1-mediated induction of interferon-alpha/beta	1	96	0.00686548	0.982592	0.982592	1	46	0.00390227	9606	Homo sapiens	HMGB1		R-HSA-168166
R-HSA-156580	Phase II - Conjugation of compounds	5	258	0.018451	0.983986	0.983986	6	70	0.00593824	9606	Homo sapiens	TRMT112;AHCY;MAT2A;GSTO1;MGST3		R-HSA-5696230;R-HSA-6800149;R-HSA-174401;R-HSA-176054;R-HSA-176059;R-HSA-5603114
R-HSA-2219530	Constitutive Signaling by Aberrant PI3K in Cancer	1	99	0.00708003	0.984669	0.984669	1	2	0.00017	9606	Homo sapiens	FYN		R-HSA-2400009
R-HSA-112310	Neurotransmitter release cycle	1	99	0.00708003	0.984669	0.984669	1	36	0.00305395	9606	Homo sapiens	SLC1A3		R-HSA-210404
R-HSA-1474244	Extracellular matrix organization	7	329	0.0235286	0.985137	0.985137	24	318	0.0269766	9606	Homo sapiens	CAST;LAMA5;DST;DAG1;LAMC1;TKT;PRKACA		R-HSA-2467716;R-HSA-2328129;R-HSA-2750187;R-HSA-4084507;R-HSA-2426530;R-HSA-4084505;R-HSA-3907292;R-HSA-2465890;R-HSA-2213192;R-HSA-2396395;R-HSA-216051;R-HSA-2426676;R-HSA-2328145;R-HSA-2426263;R-HSA-216048;R-HSA-2533874;R-HSA-8848658;R-HSA-2396113;R-HSA-2426355;R-HSA-2426450;R-HSA-2396083;R-HSA-2327803;R-HSA-2396124;R-HSA-216058
R-HSA-2029481	FCGR activation	1	103	0.00736609	0.987058	0.987058	1	6	0.000509	9606	Homo sapiens	FYN		R-HSA-2029459
R-HSA-1296071	Potassium Channels	1	103	0.00736609	0.987058	0.987058	1	17	0.00144214	9606	Homo sapiens	PBXIP1		R-HSA-1296039
R-HSA-5619102	SLC transporter disorders	2	151	0.0107988	0.987477	0.987477	2	66	0.00559891	9606	Homo sapiens	TPR;SLC1A3		R-HSA-5625015;R-HSA-5661474
R-HSA-1474290	Collagen formation	1	104	0.0074376	0.987595	0.987595	1	77	0.00653207	9606	Homo sapiens	DST		R-HSA-2213192
R-HSA-77289	Mitochondrial Fatty Acid Beta-Oxidation	1	105	0.00750912	0.98811	0.98811	1	47	0.00398711	9606	Homo sapiens	ACAA2		R-HSA-8874745
R-HSA-2730905	Role of LAT2/NTAL/LAB on calcium mobilization	1	107	0.00765215	0.989076	0.989076	1	7	0.000594	9606	Homo sapiens	FYN		R-HSA-2730860
R-HSA-416476	G alpha (q) signalling events	5	274	0.0195952	0.989945	0.989945	7	29	0.00246013	9606	Homo sapiens	ANXA1;TRIO;GNB4;PRKACA;PPOX		R-HSA-749448;R-HSA-2179413;R-HSA-749452;R-HSA-400015;R-HSA-750993;R-HSA-400586;R-HSA-379048
R-HSA-192105	Synthesis of bile acids and bile salts	1	111	0.00793821	0.990779	0.990779	4	83	0.00704106	9606	Homo sapiens	AMACR		R-HSA-193763;R-HSA-192056;R-HSA-193736;R-HSA-193452
R-HSA-1912422	Pre-NOTCH Expression and Processing	1	113	0.00808124	0.991529	0.991529	13	38	0.00322362	9606	Homo sapiens	AGO2		R-HSA-1912413;R-HSA-1912412;R-HSA-1606682;R-HSA-1912409;R-HSA-1912410;R-HSA-1912406;R-HSA-1912368;R-HSA-1912364;R-HSA-1912367;R-HSA-1912366;R-HSA-1912363;R-HSA-1912362;R-HSA-1606561
R-HSA-2559580	Oxidative Stress Induced Senescence	1	114	0.00815276	0.99188	0.99188	1	39	0.00330845	9606	Homo sapiens	TXN		R-HSA-3225851
R-HSA-611105	Respiratory electron transport	1	115	0.00822427	0.992217	0.992217	1	19	0.00161181	9606	Homo sapiens	SURF1		R-HSA-163214
R-HSA-425393	Transport of inorganic cations/anions and amino acids/oligopeptides	2	165	0.0118	0.992535	0.992535	2	75	0.0063624	9606	Homo sapiens	SLC1A3;SRI		R-HSA-428015;R-HSA-425661
R-HSA-5617472	Activation of anterior HOX genes in hindbrain development during early embryogenesis	1	116	0.00829579	0.992541	0.992541	5	43	0.00364778	9606	Homo sapiens	NCOR1		R-HSA-5617431;R-HSA-5617862;R-HSA-5617859;R-HSA-5617452;R-HSA-5617896
R-HSA-5619507	Activation of HOX genes during differentiation	1	116	0.00829579	0.992541	0.992541	5	43	0.00364778	9606	Homo sapiens	NCOR1		R-HSA-5617431;R-HSA-5617862;R-HSA-5617859;R-HSA-5617452;R-HSA-5617896
R-HSA-2142753	Arachidonic acid metabolism	2	166	0.0118716	0.992808	0.992808	2	77	0.00653207	9606	Homo sapiens	CBR1;LTA4H		R-HSA-2161651;R-HSA-266072
R-HSA-196849	Metabolism of water-soluble vitamins and cofactors	4	252	0.0180219	0.993685	0.993685	10	140	0.0118765	9606	Homo sapiens	PC;PKM;MTHFD1;GSTO1		R-HSA-8938073;R-HSA-200711;R-HSA-3323111;R-HSA-200661;R-HSA-2993802;R-HSA-200644;R-HSA-200740;R-HSA-3065959;R-HSA-200718;R-HSA-198813
R-HSA-2672351	Stimuli-sensing channels	1	120	0.00858185	0.993704	0.993704	1	24	0.00203597	9606	Homo sapiens	SRI		R-HSA-2855020
R-HSA-112315	Transmission across Chemical Synapses	5	290	0.0207395	0.99376	0.99376	6	110	0.00933152	9606	Homo sapiens	GNB4;SLC1A3;PRKACA		R-HSA-210439;R-HSA-210404;R-HSA-421007;R-HSA-416639;R-HSA-500717;R-HSA-111919
R-HSA-194068	Bile acid and bile salt metabolism	1	121	0.00865336	0.993966	0.993966	4	94	0.00797421	9606	Homo sapiens	AMACR		R-HSA-193763;R-HSA-192056;R-HSA-193736;R-HSA-193452
R-HSA-2871796	FCERI mediated MAPK activation	1	123	0.0087964	0.994457	0.994457	3	20	0.00169664	9606	Homo sapiens	PAK2		R-HSA-2730889;R-HSA-2730856;R-HSA-2730887
R-HSA-9007101	Rab regulation of trafficking	1	129	0.00922549	0.995703	0.995703	18	35	0.00296912	9606	Homo sapiens	GDI2		R-HSA-8876615;R-HSA-8876454;R-HSA-8876837;R-HSA-8877475;R-HSA-8876193;R-HSA-8877760;R-HSA-8877998;R-HSA-8877612;R-HSA-8877451;R-HSA-8876616;R-HSA-8875318;R-HSA-8877813;R-HSA-8876191;R-HSA-8877311;R-HSA-8876190;R-HSA-8876188;R-HSA-8877308;R-HSA-8875320
R-HSA-2871809	FCERI mediated Ca+2 mobilization	1	129	0.00922549	0.995703	0.995703	1	11	0.000933	9606	Homo sapiens	AHCYL1		R-HSA-169683
R-HSA-2029485	Role of phospholipids in phagocytosis	1	129	0.00922549	0.995703	0.995703	1	12	0.00101798	9606	Homo sapiens	AHCYL1		R-HSA-169683
R-HSA-446219	Synthesis of substrates in N-glycan biosythesis	1	131	0.00936852	0.996052	0.996052	1	48	0.00407194	9606	Homo sapiens	ANP32B		R-HSA-4084976
R-HSA-9609507	Protein localization	1	133	0.00951155	0.996374	0.996374	3	40	0.00339328	9606	Homo sapiens	AMACR		R-HSA-9033233;R-HSA-9033235;R-HSA-9033236
R-HSA-2980736	Peptide hormone metabolism	1	134	0.00958306	0.996524	0.996524	1	60	0.00508992	9606	Homo sapiens	KIF5B		R-HSA-265160
R-HSA-1430728	Metabolism	123	3585	0.256383	0.996745	0.996745	217	2184	0.185273	9606	Homo sapiens	ACAA2;AHCYL1;ENO1;EPRS;PSMD8;RPS18;PSMD5;PPP2R1A;CPNE1;RPL38;PRKACA;RPS12;SARS;TALDO1;RPSA;PGD;ACLY;MTHFD1;KARS;PPA1;TBL1XR1;SMS;HPRT1;PSMD11;MGST3;GLO1;GMPS;TXN;LDHB;LDHA;LARS;TPR;PGK1;LTA4H;DARS;SURF1;GOT1;ASNS;PAICS;AIMP1;AIMP2;RPS25;AMACR;QARS;CPS1;ALPP;GNAS;GNB4;MMS19;RPS20;TPP1;IARS;RPS21;ITPA;GPI;FEN1;PYCRL;FHL2;PFAS;MED12;TRMT112;NNT;RARS;PHGDH;PGM1;CBR1;ADSL;HSP90AA1;TPI1;GSTO1;PGAM1;CAD…		R-HSA-8982667;R-HSA-1655835;R-HSA-1655834;R-HSA-200711;R-HSA-1655825;R-HSA-1655826;R-HSA-200718;R-HSA-1368065;R-HSA-164377;R-HSA-2509831;R-HSA-5694071;R-HSA-2509827;R-HSA-200740;R-HSA-2509838;R-HSA-1655848;R-HSA-1655850;R-HSA-71732;R-HSA-192056;R-HSA-5333615;R-HSA-73792;R-HSA-73794;R-HSA-8878787;R-HSA-2408546;R-HSA-3065959;R-HSA-73800;R-HSA-75848;R-HSA-2408558;R-HSA-73805;R-HSA-73806;R-HSA-73812;…
R-HSA-418594	G alpha (i) signalling events	12	557	0.0398341	0.996968	0.996968	27	147	0.0124703	9606	Homo sapiens	AHCYL1;ANXA1;PPP2R1A;NMT1;GNAS;GNB4;PRKACA;METAP2		R-HSA-392129;R-HSA-749454;R-HSA-177284;R-HSA-167429;R-HSA-167433;R-HSA-112271;R-HSA-169683;R-HSA-751001;R-HSA-420883;R-HSA-749456;R-HSA-111966;R-HSA-2534087;R-HSA-111970;R-HSA-8982637;R-HSA-8951727;R-HSA-180073;R-HSA-380073;R-HSA-111919;R-HSA-167408;R-HSA-111925;R-HSA-111924;R-HSA-2534096;R-HSA-74615;R-HSA-177275;R-HSA-8982640;R-HSA-167419;R-HSA-201790
R-HSA-8956319	Nucleobase catabolism	1	139	0.00994064	0.997189	0.997189	3	58	0.00492026	9606	Homo sapiens	ITPA		R-HSA-2509831;R-HSA-2509827;R-HSA-2509838
R-HSA-977606	Regulation of Complement cascade	1	139	0.00994064	0.997189	0.997189	2	42	0.00356295	9606	Homo sapiens	CD55		R-HSA-981535;R-HSA-977619
R-HSA-3781865	Diseases of glycosylation	2	194	0.013874	0.997491	0.997491	4	77	0.00653207	9606	Homo sapiens	DAG1;PGM1		R-HSA-5615556;R-HSA-5615604;R-HSA-5609939;R-HSA-5617096
R-HSA-8957322	Metabolism of steroids	5	321	0.0229564	0.997595	0.997595	10	234	0.0198507	9606	Homo sapiens	SEC23A;FEN1;AMACR;TBL1XR1;SEC24C		R-HSA-1655848;R-HSA-193763;R-HSA-1655835;R-HSA-1655850;R-HSA-1655834;R-HSA-1655825;R-HSA-192056;R-HSA-193736;R-HSA-1655826;R-HSA-193452
R-HSA-163200	Respiratory electron transport, ATP synthesis by chemiosmotic coupling, and heat production by uncoupling proteins.	1	146	0.0104412	0.997912	0.997912	1	29	0.00246013	9606	Homo sapiens	SURF1		R-HSA-163214
R-HSA-112316	Neuronal System	8	436	0.0311807	0.997923	0.997923	9	163	0.0138276	9606	Homo sapiens	PPFIBP1;GNB4;SLC1A3;PBXIP1;PRKACA;PDLIM5		R-HSA-210439;R-HSA-1296039;R-HSA-6794354;R-HSA-210404;R-HSA-421007;R-HSA-416639;R-HSA-500717;R-HSA-388824;R-HSA-111919
R-HSA-375276	Peptide ligand-binding receptors	2	202	0.0144461	0.99815	0.99815	4	74	0.00627757	9606	Homo sapiens	ANXA1;PPOX		R-HSA-444476;R-HSA-389487;R-HSA-391913;R-HSA-389481
R-HSA-983712	Ion channel transport	2	207	0.0148037	0.998472	0.998472	4	39	0.00330845	9606	Homo sapiens	SRI;ATP9A		R-HSA-427910;R-HSA-2855020;R-HSA-947591;R-HSA-939763
R-HSA-202733	Cell surface interactions at the vascular wall	3	256	0.0183079	0.998624	0.998624	4	64	0.00542925	9606	Homo sapiens	FYN;MIF;PPIA		R-HSA-210291;R-HSA-114577;R-HSA-5676133;R-HSA-204485
R-HSA-166658	Complement cascade	1	156	0.0111564	0.998635	0.998635	2	71	0.00602307	9606	Homo sapiens	CD55		R-HSA-981535;R-HSA-977619
R-HSA-196854	Metabolism of vitamins and cofactors	6	381	0.0272474	0.998778	0.998778	14	201	0.0170512	9606	Homo sapiens	HSP90AA1;PC;PKM;MTHFD1;GSTO1;TPP1		R-HSA-200711;R-HSA-2993802;R-HSA-200644;R-HSA-200740;R-HSA-3065959;R-HSA-200718;R-HSA-1497784;R-HSA-8938073;R-HSA-1497796;R-HSA-3323111;R-HSA-200661;R-HSA-8874705;R-HSA-8874718;R-HSA-198813
R-HSA-9018678	Biosynthesis of specialized proresolving mediators (SPMs)	1	159	0.0113709	0.998799	0.998799	8	124	0.0105192	9606	Homo sapiens	LTA4H		R-HSA-9024890;R-HSA-9018877;R-HSA-9020253;R-HSA-9020252;R-HSA-9020270;R-HSA-9018862;R-HSA-9020257;R-HSA-9020258
R-HSA-446193	Biosynthesis of the N-glycan precursor (dolichol lipid-linked oligosaccharide, LLO) and transfer to a nascent protein	1	159	0.0113709	0.998799	0.998799	1	62	0.00525959	9606	Homo sapiens	ANP32B		R-HSA-4084976
R-HSA-425366	Transport of bile salts and organic acids, metal ions and amine compounds	1	165	0.0118	0.999069	0.999069	1	66	0.00559891	9606	Homo sapiens	SLC39A10		R-HSA-442345
R-HSA-913531	Interferon Signaling	6	392	0.028034	0.99913	0.99913	6	66	0.00559891	9606	Homo sapiens	EIF4A1;TPR;UBE2N;ABCE1;EIF4G2;EIF4G1		R-HSA-1678842;R-HSA-5223305;R-HSA-8985201;R-HSA-8985123;R-HSA-1176059;R-HSA-1169402
R-HSA-1483206	Glycerophospholipid biosynthesis	2	222	0.0158764	0.999141	0.999141	2	133	0.0112827	9606	Homo sapiens	ALPP;CPNE1		R-HSA-8878787;R-HSA-5333678
R-HSA-2173782	Binding and Uptake of Ligands by Scavenger Receptors	1	167	0.0119431	0.999145	0.999145	2	33	0.00279946	9606	Homo sapiens	HSP90AA1		R-HSA-2247514;R-HSA-2197645
R-HSA-382551	Transport of small molecules	23	960	0.0686548	0.999149	0.999149	22	430	0.0364778	9606	Homo sapiens	PSMD11;HDLBP;SLC39A10;SLC1A3;NEDD8;SRI;EIF2S1;PSMA7;PSMD8;PSMA6;EIF2S3;CAND1;PSMA4;PSMB5;PSMA2;PSMD5;PSMB1;GNAS;GNB4;PRKACA;ATP9A;EIF2A		R-HSA-427910;R-HSA-163617;R-HSA-5682101;R-HSA-432195;R-HSA-2855020;R-HSA-8951727;R-HSA-947591;R-HSA-428015;R-HSA-8858252;R-HSA-5691131;R-HSA-5227009;R-HSA-432232;R-HSA-442345;R-HSA-5691108;R-HSA-111925;R-HSA-422320;R-HSA-432188;R-HSA-164377;R-HSA-425661;R-HSA-939763;R-HSA-8866553;R-HSA-5691176
R-HSA-909733	Interferon alpha/beta signaling	1	184	0.0131588	0.999586	0.999586	1	20	0.00169664	9606	Homo sapiens	ABCE1		R-HSA-5223305
R-HSA-8978868	Fatty acid metabolism	6	429	0.0306801	0.99973	0.99973	6	217	0.0184086	9606	Homo sapiens	ACLY;CBR1;FEN1;ACAA2;AMACR;LTA4H		R-HSA-2161651;R-HSA-548814;R-HSA-75848;R-HSA-389897;R-HSA-266072;R-HSA-8874745
R-HSA-162582	Signal Transduction	98	3158	0.225846	0.999839	0.999839	401	2130	0.180692	9606	Homo sapiens	AHCYL1;TRIO;CCNT1;GDI2;PEBP1;PTPRJ;LAMC1;CHD3;CDC73;IGF1R;PSMD8;XPO1;PSMD5;PPP2R1A;KIF5B;ARHGDIA;CFL1;PRKACA;WLS;SEC13;NUDC;HSP90AA1;MAP2K2;ANXA1;PARP1;MIF;GTF2F1;CKAP5;UCHL5;TUBA4A;DNM2;NCOR2;PSMA6;NCOR1;PSMA4;KIF2A;TBL1XR1;PSMA2;STRAP;ARHGEF2;TLN1;MAPRE1;PFN1;FKBP4;VCL;PAFAH1B1;LAMA5;PSMD11;SET;CTBP2;MIS12;NEDD8;RASAL2;KLC1;PPOX;PMF1;FSTL1;PSMA7;DNAJB1;PSMB5;PSMB1;FYN;BUB3;PAK2;CD55;EIF4B;CLASP…		R-HSA-1606682;R-HSA-1562641;R-HSA-5626962;R-HSA-3769392;R-HSA-5668932;R-HSA-420883;R-HSA-3769391;R-HSA-2187325;R-HSA-6803527;R-HSA-6803523;R-HSA-178215;R-HSA-8982703;R-HSA-2428930;R-HSA-8943780;R-HSA-5668984;R-HSA-5626981;R-HSA-5625959;R-HSA-5626982;R-HSA-380979;R-HSA-879674;R-HSA-444476;R-HSA-8982709;R-HSA-201790;R-HSA-5672980;R-HSA-2128994;R-HSA-5672978;R-HSA-5665809;R-HSA-5138432;R-HSA-201810;…
R-HSA-1483257	Phospholipid metabolism	2	315	0.0225274	0.999978	0.999978	2	218	0.0184934	9606	Homo sapiens	ALPP;CPNE1		R-HSA-8878787;R-HSA-5333678
R-HSA-211859	Biological oxidations	7	547	0.0391189	0.999978	0.999978	11	186	0.0157788	9606	Homo sapiens	TRMT112;HSP90AA1;AHCY;CPS1;MAT2A;GSTO1;MGST3		R-HSA-5696230;R-HSA-5433074;R-HSA-6800149;R-HSA-174401;R-HSA-176054;R-HSA-5423653;R-HSA-176059;R-HSA-8937169;R-HSA-8936849;R-HSA-8937191;R-HSA-5603114
R-HSA-425407	SLC-mediated transmembrane transport	3	412	0.0294644	0.999996	0.999996	3	184	0.0156091	9606	Homo sapiens	SLC1A3;SLC39A10;SRI		R-HSA-428015;R-HSA-425661;R-HSA-442345
R-HSA-211945	Phase I - Functionalization of compounds	1	300	0.0214546	0.999997	0.999997	3	99	0.00839837	9606	Homo sapiens	HSP90AA1		R-HSA-8937169;R-HSA-8936849;R-HSA-8937191
R-HSA-500792	GPCR ligand binding	6	629	0.0449832	1	1	6	173	0.0146759	9606	Homo sapiens	ANXA1;GNAS;GNB4;PPOX;CD55		R-HSA-879674;R-HSA-381612;R-HSA-444476;R-HSA-389487;R-HSA-391913;R-HSA-389481
R-HSA-373076	Class A/1 (Rhodopsin-like receptors)	2	438	0.0313237	1	1	4	146	0.0123855	9606	Homo sapiens	ANXA1;PPOX		R-HSA-444476;R-HSA-389487;R-HSA-391913;R-HSA-389481
R-HSA-418555	G alpha (s) signalling events	3	602	0.0430523	1	1	7	14	0.00118765	9606	Homo sapiens	GNAS;GNB4		R-HSA-379044;R-HSA-163617;R-HSA-392129;R-HSA-744887;R-HSA-744886;R-HSA-751013;R-HSA-164381
R-HSA-556833	Metabolism of lipids	21	1433	0.102482	1	1	68	942	0.0799118	9606	Homo sapiens	CBR1;SEC23A;FEN1;ACAA2;TXNRD1;FHL2;MED27;NCOR2;MED12;ACLY;NCOR1;AMACR;TBL1XR1;ALPP;CPNE1;LTA4H;PRKACA;SEC24C		R-HSA-1655835;R-HSA-1655834;R-HSA-1655825;R-HSA-400143;R-HSA-1655826;R-HSA-1989778;R-HSA-389897;R-HSA-1989779;R-HSA-560517;R-HSA-1989776;R-HSA-1989777;R-HSA-1989774;R-HSA-1989775;R-HSA-1989772;R-HSA-1989773;R-HSA-1989770;R-HSA-1368065;R-HSA-1989771;R-HSA-1989768;R-HSA-1989767;R-HSA-1989764;R-HSA-1989765;R-HSA-1989762;R-HSA-1989760;R-HSA-1989761;R-HSA-193452;R-HSA-400183;R-HSA-1655848;R-HSA-165585…
R-HSA-388396	GPCR downstream signalling	15	1344	0.0961167	1	1	56	215	0.0182389	9606	Homo sapiens	AHCYL1;ANXA1;TRIO;PPP2R1A;NMT1;GNAS;GNB4;ARHGEF2;PRKACA;PPOX;METAP2		R-HSA-749448;R-HSA-749454;R-HSA-177284;R-HSA-749453;R-HSA-749452;R-HSA-750988;R-HSA-167429;R-HSA-400015;R-HSA-167433;R-HSA-749446;R-HSA-112271;R-HSA-751001;R-HSA-420883;R-HSA-750993;R-HSA-749456;R-HSA-164381;R-HSA-751019;R-HSA-379044;R-HSA-163617;R-HSA-8982703;R-HSA-8951727;R-HSA-380073;R-HSA-379048;R-HSA-751013;R-HSA-111919;R-HSA-111925;R-HSA-751039;R-HSA-111924;R-HSA-751027;R-HSA-751024;R-HSA-7…
R-HSA-372790	Signaling by GPCR	16	1447	0.103483	1	1	62	388	0.0329148	9606	Homo sapiens	AHCYL1;ANXA1;TRIO;PPP2R1A;NMT1;GNAS;GNB4;ARHGEF2;PRKACA;PPOX;CD55;METAP2		R-HSA-749448;R-HSA-749454;R-HSA-177284;R-HSA-749453;R-HSA-749452;R-HSA-750988;R-HSA-167429;R-HSA-400015;R-HSA-167433;R-HSA-749446;R-HSA-112271;R-HSA-751001;R-HSA-420883;R-HSA-750993;R-HSA-749456;R-HSA-164381;R-HSA-751019;R-HSA-379044;R-HSA-163617;R-HSA-8982703;R-HSA-8951727;R-HSA-381612;R-HSA-380073;R-HSA-379048;R-HSA-751013;R-HSA-111919;R-HSA-111925;R-HSA-751039;R-HSA-111924;R-HSA-879674;R-HSA-7…

## Sheet: Downregulated pathways
Pathway identifier	Pathway name	#Entities found	#Entities total	Entities ratio	Entities pValue	Entities FDR	#Reactions found	#Reactions total	Reactions ratio	Species identifier	Species name	Submitted entities found	Mapped entities	Found reaction identifiers
R-HSA-1236977	Endosomal/Vacuolar pathway	73	82	0.00586426	1.11022e-16	7.77156e-15	4	4	0.000339328	9606	Homo sapiens	CTSL;HLA-B;HLA-C;HLA-A;B2M		R-HSA-1236964;R-HSA-1236948;R-HSA-1236954;R-HSA-1236943
R-HSA-983170	Antigen Presentation: Folding, assembly and peptide loading of class I MHC	75	102	0.00729457	1.11022e-16	7.77156e-15	15	16	0.00135731	9606	Homo sapiens	ERAP1;HLA-B;TAP2;HLA-C;TAP1;HLA-A;B2M;TAPBP		R-HSA-8951499;R-HSA-983148;R-HSA-983146;R-HSA-983145;R-HSA-983144;R-HSA-983142;R-HSA-983427;R-HSA-983426;R-HSA-983138;R-HSA-983425;R-HSA-983424;R-HSA-983422;R-HSA-983421;R-HSA-983161;R-HSA-983158
R-HSA-1236974	ER-Phagosome pathway	77	164	0.0117285	1.11022e-16	7.77156e-15	8	10	0.00084832	9606	Homo sapiens	VAMP8;SEC61A1;SEC61G;HLA-B;TAP2;HLA-C;TAP1;HLA-A;B2M;TAPBP		R-HSA-1236947;R-HSA-8863973;R-HSA-8951595;R-HSA-8863858;R-HSA-1236965;R-HSA-1236949;R-HSA-1236971;R-HSA-8863914
R-HSA-983169	Class I MHC mediated antigen processing & presentation	80	464	0.0331832	1.11022e-16	7.77156e-15	27	48	0.00407194	9606	Homo sapiens	VAMP8;SEC61A1;CTSL;SEC61G;ERAP1;HLA-B;TAP2;HLA-C;TAP1;HLA-A;B2M;TAPBP		R-HSA-1236947;R-HSA-8951499;R-HSA-1236948;R-HSA-1236949;R-HSA-1236954;R-HSA-983427;R-HSA-983426;R-HSA-983425;R-HSA-983424;R-HSA-1236943;R-HSA-8863973;R-HSA-983148;R-HSA-8951595;R-HSA-983146;R-HSA-983145;R-HSA-983144;R-HSA-983142;R-HSA-983138;R-HSA-8863914;R-HSA-983422;R-HSA-983421;R-HSA-8863858;R-HSA-1236964;R-HSA-983161;R-HSA-1236965;R-HSA-1236971;R-HSA-983158
R-HSA-1236975	Antigen processing-Cross presentation	79	186	0.0133019	1.11022e-16	7.77156e-15	12	23	0.00195114	9606	Homo sapiens	VAMP8;SEC61A1;CTSL;SEC61G;HLA-B;TAP2;HLA-C;TAP1;HLA-A;B2M;TAPBP		R-HSA-1236947;R-HSA-8863973;R-HSA-8951595;R-HSA-8863858;R-HSA-1236964;R-HSA-1236948;R-HSA-1236965;R-HSA-1236949;R-HSA-1236954;R-HSA-1236971;R-HSA-1236943;R-HSA-8863914
R-HSA-913531	Interferon Signaling	82	392	0.028034	1.11022e-16	7.77156e-15	22	66	0.00559891	9606	Homo sapiens	HLA-B;HLA-C;ISG15;HLA-A;B2M;PTPN2;PML;OASL		R-HSA-1678841;R-HSA-936462;R-HSA-997326;R-HSA-1169395;R-HSA-1678843;R-HSA-1169394;R-HSA-1678842;R-HSA-1169397;R-HSA-1169399;R-HSA-1169398;R-HSA-8985153;R-HSA-1169307;R-HSA-1176059;R-HSA-1169403;R-HSA-1031716;R-HSA-1169402;R-HSA-1169405;R-HSA-1169404;R-HSA-1031713;R-HSA-1169406;R-HSA-1015702;R-HSA-1015699
R-HSA-198933	Immunoregulatory interactions between a Lymphoid and a non-Lymphoid cell	72	316	0.0225989	1.11022e-16	7.77156e-15	14	43	0.00364778	9606	Homo sapiens	CD81;HLA-B;HLA-C;HLA-A;B2M		R-HSA-199043;R-HSA-199587;R-HSA-199169;R-HSA-199558;R-HSA-198955;R-HSA-198958;R-HSA-199566;R-HSA-8850326;R-HSA-8850356;R-HSA-199062;R-HSA-199579;R-HSA-199576;R-HSA-199583;R-HSA-199518
R-HSA-1280218	Adaptive Immune System	91	997	0.0713009	1.11022e-16	7.77156e-15	60	261	0.0221412	9606	Homo sapiens	LYN;YES1;CD81;ERAP1;HLA-B;TAP2;HLA-C;TAP1;HLA-A;DYNLL2;PPL;TAPBP;VAMP8;SEC61A1;STIM1;CTSL;SEC61G;PPIF;RAF1;CTSD;B2M;LGMN;CTSB		R-HSA-199043;R-HSA-2130336;R-HSA-9606163;R-HSA-199169;R-HSA-2025882;R-HSA-199558;R-HSA-392835;R-HSA-434700;R-HSA-983427;R-HSA-983426;R-HSA-199566;R-HSA-2130349;R-HSA-983425;R-HSA-983424;R-HSA-8850326;R-HSA-983709;R-HSA-199062;R-HSA-5690702;R-HSA-199579;R-HSA-199576;R-HSA-199583;R-HSA-199587;R-HSA-2213248;R-HSA-8951595;R-HSA-198955;R-HSA-198958;R-HSA-8863914;R-HSA-2130706;R-HSA-8850356;R-HSA-89384…
R-HSA-877300	Interferon gamma signaling	80	250	0.0178789	1.11022e-16	7.77156e-15	3	15	0.00127248	9606	Homo sapiens	HLA-B;HLA-C;HLA-A;B2M;PTPN2;PML;OASL		R-HSA-997326;R-HSA-1031716;R-HSA-1031713
R-HSA-909733	Interferon alpha/beta signaling	77	184	0.0131588	1.11022e-16	7.77156e-15	2	20	0.00169664	9606	Homo sapiens	HLA-B;HLA-C;ISG15;HLA-A;OASL		R-HSA-1015702;R-HSA-1015699
R-HSA-1280215	Cytokine Signaling in Immune system	88	1055	0.0754488	1.11022e-16	7.77156e-15	30	639	0.0542077	9606	Homo sapiens	LYN;ADAM17;YES1;HLA-B;PPIF;HLA-C;ISG15;HLA-A;B2M;PTPN2;PML;OASL		R-HSA-936462;R-HSA-997326;R-HSA-8985153;R-HSA-1169307;R-HSA-1168777;R-HSA-1015702;R-HSA-1168456;R-HSA-1168459;R-HSA-1015699;R-HSA-1678841;R-HSA-879917;R-HSA-1169395;R-HSA-1678843;R-HSA-1169394;R-HSA-1678842;R-HSA-1169397;R-HSA-1169399;R-HSA-1169398;R-HSA-1176059;R-HSA-1169403;R-HSA-1031716;R-HSA-1169402;R-HSA-1169405;R-HSA-1169404;R-HSA-1031713;R-HSA-1169406;R-HSA-8950328;R-HSA-9008894;R-HSA-9126…
R-HSA-168256	Immune System	124	2641	0.188872	1.90953e-09	1.2412e-07	178	1493	0.126654	9606	Homo sapiens	ASAH1;CANT1;CD81;UNC93B1;SLC44A2;CTSZ;PPL;OASL;SEC61A1;CTSL;SEC61G;FADD;B2M;CTSD;CTSB;LYN;YES1;DGAT1;ERAP1;FUCA2;HLA-B;PLAUR;TAP2;HLA-C;NDUFC2;TAP1;ISG15;HLA-A;BAIAP2;DYNLL2;PML;TAPBP;VAMP8;GALNS;MAVS;ADAM17;STIM1;NPC2;DNAJC5;SPAG1;PPIF;CTNNB1;MYH9;RAF1;GLA;PTPN2;LGMN		R-HSA-936462;R-HSA-199169;R-HSA-9013889;R-HSA-434700;R-HSA-2395439;R-HSA-9013895;R-HSA-8850326;R-HSA-936475;R-HSA-5690702;R-HSA-879917;R-HSA-2562564;R-HSA-198955;R-HSA-1031716;R-HSA-198958;R-HSA-8863914;R-HSA-1031713;R-HSA-2395412;R-HSA-990526;R-HSA-2130706;R-HSA-2130194;R-HSA-8850356;R-HSA-8938431;R-HSA-2272795;R-HSA-5621355;R-HSA-8951499;R-HSA-2730860;R-HSA-2730862;R-HSA-2730851;R-HSA-990528;R-…
R-HSA-1679131	Trafficking and processing of endosomal TLR	5	16	0.00114425	0.000105843	0.00623192	5	7	0.000593824	9606	Homo sapiens	CTSL;UNC93B1;LGMN;CTSB		R-HSA-1678921;R-HSA-1678920;R-HSA-1678927;R-HSA-1678981;R-HSA-1678998
R-HSA-210991	Basigin interactions	6	26	0.0018594	0.000113308	0.00623192	10	10	0.00084832	9606	Homo sapiens	ITGA3;CAV1;BSG;PPIF;ATP1B3;ITGA6		R-HSA-204434;R-HSA-204465;R-HSA-204549;R-HSA-204485;R-HSA-204500;R-HSA-375133;R-HSA-375135;R-HSA-204392;R-HSA-204600;R-HSA-375131
R-HSA-1428517	The citric acid (TCA) cycle and respiratory electron transport	17	229	0.016377	0.000355972	0.0185105	19	65	0.00551408	9606	Homo sapiens	TIMMDC1;NDUFA6;MT-CO1;NDUFA10;IDH2;ETFDH;NDUFC2;DLST;NDUFC1;COX6A1;LRPPRC;PDP1;GSTZ1;BSG;NDUFV2;NDUFV1		R-HSA-6800870;R-HSA-9011595;R-HSA-6799203;R-HSA-6799202;R-HSA-71401;R-HSA-204169;R-HSA-6788556;R-HSA-6799179;R-HSA-163214;R-HSA-6799178;R-HSA-373867;R-HSA-450984;R-HSA-6799191;R-HSA-163217;R-HSA-169270;R-HSA-373875;R-HSA-70967;R-HSA-6799197;R-HSA-6799196
R-HSA-611105	Respiratory electron transport	11	115	0.00822427	0.00052379	0.0251419	12	19	0.00161181	9606	Homo sapiens	TIMMDC1;NDUFA6;MT-CO1;NDUFA10;ETFDH;NDUFC2;NDUFC1;NDUFV2;COX6A1;NDUFV1;LRPPRC		R-HSA-6799191;R-HSA-6800870;R-HSA-163217;R-HSA-169270;R-HSA-6799203;R-HSA-6799202;R-HSA-6799197;R-HSA-6799196;R-HSA-6788556;R-HSA-6799179;R-HSA-163214;R-HSA-6799178
R-HSA-6799198	Complex I biogenesis	7	57	0.00407638	0.00134133	0.0603597	9	13	0.00110282	9606	Homo sapiens	TIMMDC1;NDUFA6;NDUFA10;NDUFC2;NDUFC1;NDUFV2;NDUFV1		R-HSA-6799191;R-HSA-6800870;R-HSA-6799203;R-HSA-6799202;R-HSA-6799197;R-HSA-6799196;R-HSA-6788556;R-HSA-6799179;R-HSA-6799178
R-HSA-3928663	EPHA-mediated growth cone collapse	5	33	0.00236001	0.00267762	0.115138	4	4	0.000339328	9606	Homo sapiens	LYN;MYL6;YES1;MYH9;EPHA2		R-HSA-3928651;R-HSA-3928602;R-HSA-3928648;R-HSA-3928616
R-HSA-163200	Respiratory electron transport, ATP synthesis by chemiosmotic coupling, and heat production by uncoupling proteins.	11	146	0.0104413	0.00336938	0.138144	12	29	0.00246013	9606	Homo sapiens	TIMMDC1;NDUFA6;MT-CO1;NDUFA10;ETFDH;NDUFC2;NDUFC1;NDUFV2;COX6A1;NDUFV1;LRPPRC		R-HSA-6799191;R-HSA-6800870;R-HSA-163217;R-HSA-169270;R-HSA-6799203;R-HSA-6799202;R-HSA-6799197;R-HSA-6799196;R-HSA-6788556;R-HSA-6799179;R-HSA-163214;R-HSA-6799178
R-HSA-351906	Apoptotic cleavage of cell adhesion proteins	3	11	0.00078667	0.0039448	0.153657	3	10	0.00084832	9606	Homo sapiens	TJP1;CTNNB1;TJP2		R-HSA-351871;R-HSA-202969;R-HSA-351913
R-HSA-2426168	Activation of gene expression by SREBF (SREBP)	7	70	0.00500608	0.00415289	0.153657	8	42	0.00356295	9606	Homo sapiens	LYN;SQLE;SCD;FDFT1		R-HSA-1655849;R-HSA-1655848;R-HSA-2426151;R-HSA-1655850;R-HSA-6800052;R-HSA-2426146;R-HSA-1655826;R-HSA-1655844
R-HSA-1655829	Regulation of cholesterol biosynthesis by SREBP (SREBF)	7	86	0.00615033	0.0120416	0.402029	8	52	0.00441127	9606	Homo sapiens	LYN;SQLE;SCD;FDFT1		R-HSA-1655849;R-HSA-1655848;R-HSA-2426151;R-HSA-1655850;R-HSA-6800052;R-HSA-2426146;R-HSA-1655826;R-HSA-1655844
R-HSA-3000157	Laminin interactions	4	31	0.00221698	0.0121827	0.402029	4	15	0.00127248	9606	Homo sapiens	ITGB4;ITGA3;ITGA2;ITGA6		R-HSA-216051;R-HSA-216048;R-HSA-3907292;R-HSA-349626
R-HSA-446728	Cell junction organization	7	94	0.00672245	0.0186147	0.582727	11	37	0.00313879	9606	Homo sapiens	ITGB4;CTNNB1;ITGA6;MPP5;F11R;MLLT4;INADL		R-HSA-420661;R-HSA-446083;R-HSA-432956;R-HSA-446077;R-HSA-432909;R-HSA-419981;R-HSA-433725;R-HSA-419002;R-HSA-419003;R-HSA-432952;R-HSA-446089
R-HSA-75094	Formation of the Editosome	2	8	0.000572123	0.0219556	0.582727	1	2	0.000169664	9606	Homo sapiens	APOBEC3B		R-HSA-77609
R-HSA-8935964	RUNX1 regulates expression of components of tight junctions	2	8	0.000572123	0.0219556	0.582727	2	6	0.000508992	9606	Homo sapiens	TJP1		R-HSA-8935960;R-HSA-8935972
R-HSA-427652	Sodium-coupled phosphate cotransporters	2	8	0.000572123	0.0219556	0.582727	1	3	0.000254496	9606	Homo sapiens	SLC20A2;SLC20A1		R-HSA-427605
R-HSA-1799339	SRP-dependent cotranslational protein targeting to membrane	8	121	0.00865336	0.0231594	0.582727	5	5	0.00042416	9606	Homo sapiens	SEC61A1;RPS28;RPS27;RPL31;SEC61G;RPL35A		R-HSA-1799326;R-HSA-1799330;R-HSA-1799329;R-HSA-1799335;R-HSA-1799332
R-HSA-2682334	EPH-Ephrin signaling	7	101	0.00722306	0.0261469	0.582727	22	56	0.00475059	9606	Homo sapiens	LYN;APH1A;MYL6;YES1;MYH9;MYL12A;EPHA2		R-HSA-3928602;R-HSA-3928607;R-HSA-4093336;R-HSA-3928604;R-HSA-3928627;R-HSA-3928656;R-HSA-3928597;R-HSA-3928628;R-HSA-3928660;R-HSA-3928651;R-HSA-4093327;R-HSA-3928584;R-HSA-3928648;R-HSA-3928616;R-HSA-3928591;R-HSA-3928623;R-HSA-3928642;R-HSA-3928578;R-HSA-3928640;R-HSA-3928583;R-HSA-3928646;R-HSA-3928645
R-HSA-72200	mRNA Editing: C to U Conversion	2	10	0.000715154	0.0330699	0.582727	2	3	0.000254496	9606	Homo sapiens	APOBEC3B		R-HSA-77609;R-HSA-83677
R-HSA-6798695	Neutrophil degranulation	21	480	0.0343274	0.0338662	0.582727	9	10	0.00084832	9606	Homo sapiens	ASAH1;CANT1;DGAT1;SLC44A2;CTSZ;FUCA2;HLA-B;PLAUR;HLA-C;NDUFC2;HLA-A;GALNS;VAMP8;NPC2;DNAJC5;PPIF;CTSD;B2M;GLA;CTSB		R-HSA-6798743;R-HSA-6799350;R-HSA-6798739;R-HSA-6800434;R-HSA-6798751;R-HSA-6798749;R-HSA-6798748;R-HSA-6798747;R-HSA-6798745
R-HSA-216083	Integrin cell surface interactions	6	86	0.00615033	0.0369773	0.582727	17	54	0.00458093	9606	Homo sapiens	ITGA3;ITGA2;BSG;ITGA6;ITGA5;F11R		R-HSA-114563;R-HSA-2473511;R-HSA-4088220;R-HSA-4085083;R-HSA-2467436;R-HSA-216040;R-HSA-2327695;R-HSA-4084910;R-HSA-204434;R-HSA-265429;R-HSA-4085133;R-HSA-265424;R-HSA-4086216;R-HSA-4088264;R-HSA-2426259;R-HSA-202718;R-HSA-2470555
R-HSA-9609507	Protein localization	8	133	0.00951155	0.0372094	0.582727	12	40	0.00339328	9606	Homo sapiens	HMGCL;CHCHD2;PITRM1;GRPEL1;ACOX1;EHHADH;GRPEL2;NUDT19		R-HSA-1299475;R-HSA-9033515;R-HSA-1299478;R-HSA-1299476;R-HSA-9033233;R-HSA-1307802;R-HSA-1299482;R-HSA-9033235;R-HSA-1299480;R-HSA-8986181;R-HSA-1299487;R-HSA-9033236
R-HSA-446107	Type I hemidesmosome assembly	2	11	0.00078667	0.0392898	0.582727	6	6	0.000508992	9606	Homo sapiens	ITGB4;ITGA6		R-HSA-446083;R-HSA-432956;R-HSA-446077;R-HSA-432909;R-HSA-432952;R-HSA-446089
R-HSA-164940	Nef mediated downregulation of MHC class I complex cell surface expression	2	11	0.00078667	0.0392898	0.582727	4	4	0.000339328	9606	Homo sapiens	HLA-A;B2M		R-HSA-182243;R-HSA-182279;R-HSA-182263;R-HSA-182286
R-HSA-8939242	RUNX1 regulates transcription of genes involved in differentiation of keratinocytes	2	11	0.00078667	0.0392898	0.582727	1	8	0.000678656	9606	Homo sapiens	CTSL		R-HSA-8938108
R-HSA-421270	Cell-cell junction organization	5	67	0.00479153	0.0430798	0.582727	5	21	0.00178147	9606	Homo sapiens	CTNNB1;MPP5;F11R;MLLT4;INADL		R-HSA-420661;R-HSA-419981;R-HSA-433725;R-HSA-419002;R-HSA-419003
R-HSA-2022090	Assembly of collagen fibrils and other multimeric structures	5	67	0.00479153	0.0430798	0.582727	2	26	0.00220563	9606	Homo sapiens	CTSL;ITGB4;ITGA6;CTSB		R-HSA-2213200;R-HSA-2213192
R-HSA-193692	Regulated proteolysis of p75NTR	2	12	0.000858185	0.0459133	0.582727	2	5	0.00042416	9606	Homo sapiens	APH1A;ADAM17		R-HSA-193682;R-HSA-193679
R-HSA-75072	mRNA Editing	2	12	0.000858185	0.0459133	0.582727	2	9	0.000763488	9606	Homo sapiens	APOBEC3B		R-HSA-77609;R-HSA-83677
R-HSA-70895	Branched-chain amino acid catabolism	5	69	0.00493456	0.0477477	0.582727	5	28	0.0023753	9606	Homo sapiens	BCKDHA;BCKDK;ALDH6A1;BCKDHB;ACADSB		R-HSA-70800;R-HSA-5693153;R-HSA-70713;R-HSA-5693148;R-HSA-70893
R-HSA-6811438	Intra-Golgi traffic	4	48	0.00343274	0.0485782	0.582727	6	10	0.00084832	9606	Homo sapiens	GOLGA5;GOSR2;TRIP11;BET1L		R-HSA-8847638;R-HSA-8847637;R-HSA-8847635;R-HSA-8847875;R-HSA-6811433;R-HSA-8847544
R-HSA-3000170	Syndecan interactions	3	29	0.00207395	0.0500428	0.582727	1	15	0.00127248	9606	Homo sapiens	ITGB4;ITGA2;ITGA6		R-HSA-2731074
R-HSA-933543	NF-kB activation through FADD/RIP-1 pathway mediated by caspase-8 and -10	2	13	0.0009297	0.0529132	0.582727	5	5	0.00042416	9606	Homo sapiens	MAVS;FADD		R-HSA-933532;R-HSA-168934;R-HSA-933526;R-HSA-933539;R-HSA-933523
R-HSA-420029	Tight junction interactions	3	30	0.00214546	0.0542963	0.582727	2	3	0.000254496	9606	Homo sapiens	MPP5;F11R;INADL		R-HSA-420661;R-HSA-419981
R-HSA-5602415	UNC93B1 deficiency - HSE	1	2	0.000143031	0.0549347	0.582727	1	1	8.4832e-05	9606	Homo sapiens	UNC93B1		R-HSA-5607838
R-HSA-4570571	Defective RFT1 causes RFT1-CDG (CDG-1n)	1	2	0.000143031	0.0549347	0.582727	1	1	8.4832e-05	9606	Homo sapiens	RFT1		R-HSA-4570573
R-HSA-111452	Activation and oligomerization of BAK protein	1	2	0.000143031	0.0549347	0.582727	2	3	0.000254496	9606	Homo sapiens	BID		R-HSA-168848;R-HSA-139895
R-HSA-114294	Activation, translocation and oligomerization of BAX	1	2	0.000143031	0.0549347	0.582727	2	4	0.000339328	9606	Homo sapiens	BID		R-HSA-168849;R-HSA-139917
R-HSA-191273	Cholesterol biosynthesis	5	72	0.00514911	0.0552898	0.582727	9	32	0.00271463	9606	Homo sapiens	SQLE;NSDHL;DHCR24;MSMO1;FDFT1		R-HSA-194642;R-HSA-191299;R-HSA-194641;R-HSA-196417;R-HSA-191402;R-HSA-194718;R-HSA-194669;R-HSA-191405;R-HSA-6807064
R-HSA-8941332	RUNX2 regulates genes involved in cell migration	2	14	0.00100122	0.0602635	0.582727	2	7	0.000593824	9606	Homo sapiens	ITGA5		R-HSA-8939667;R-HSA-8939670
R-HSA-210990	PECAM1 interactions	2	14	0.00100122	0.0602635	0.582727	1	7	0.000593824	9606	Homo sapiens	LYN;YES1		R-HSA-210291
R-HSA-2172127	DAP12 interactions	4	52	0.0037188	0.0614562	0.582727	15	33	0.00279946	9606	Homo sapiens	HLA-B;HLA-C;B2M		R-HSA-2424484;R-HSA-2424486;R-HSA-2424487;R-HSA-2424480;R-HSA-210309;R-HSA-2424482;R-HSA-2395439;R-HSA-2395412;R-HSA-210289;R-HSA-2272753;R-HSA-2396594;R-HSA-2272795;R-HSA-210298;R-HSA-2395801;R-HSA-2172126
R-HSA-1989781	PPARA activates gene expression	9	174	0.0124437	0.0615066	0.582727	41	41	0.00347811	9606	Homo sapiens	LYN;ACSL1;ACOX1;ACADM;FDFT1		R-HSA-1655826;R-HSA-1989778;R-HSA-1989779;R-HSA-560517;R-HSA-1989776;R-HSA-1989777;R-HSA-1989774;R-HSA-560473;R-HSA-1989775;R-HSA-1989772;R-HSA-1989773;R-HSA-1989770;R-HSA-1368065;R-HSA-1989771;R-HSA-1989768;R-HSA-1989767;R-HSA-1989764;R-HSA-1989765;R-HSA-1989762;R-HSA-1989760;R-HSA-1989761;R-HSA-1989758;R-HSA-1989759;R-HSA-879724;R-HSA-1989756;R-HSA-1989757;R-HSA-1989754;R-HSA-1989755;R-HSA-1989…
R-HSA-71406	Pyruvate metabolism and Citric Acid (TCA) cycle	6	98	0.00700851	0.0617179	0.582727	7	36	0.00305395	9606	Homo sapiens	PDP1;GSTZ1;BSG;IDH2;DLST		R-HSA-9011595;R-HSA-373875;R-HSA-70967;R-HSA-71401;R-HSA-204169;R-HSA-373867;R-HSA-450984
R-HSA-2122948	Activated NOTCH1 Transmits Signal to the Nucleus	3	32	0.00228849	0.0633018	0.582727	6	21	0.00178147	9606	Homo sapiens	APH1A;ADAM17;NUMB		R-HSA-157632;R-HSA-1980109;R-HSA-157353;R-HSA-1980128;R-HSA-1980112;R-HSA-1912386
R-HSA-156902	Peptide chain elongation	6	99	0.00708003	0.0641341	0.582727	4	5	0.00042416	9606	Homo sapiens	RPS28;RPS27;RPL31;RPL35A		R-HSA-156915;R-HSA-156912;R-HSA-156923;R-HSA-156907
R-HSA-400206	Regulation of lipid metabolism by Peroxisome proliferator-activated receptor alpha (PPARalpha)	9	176	0.0125867	0.0650356	0.582727	42	44	0.00373261	9606	Homo sapiens	LYN;ACSL1;ACOX1;ACADM;FDFT1		R-HSA-400143;R-HSA-1655826;R-HSA-1989778;R-HSA-1989779;R-HSA-560517;R-HSA-1989776;R-HSA-1989777;R-HSA-1989774;R-HSA-560473;R-HSA-1989775;R-HSA-1989772;R-HSA-1989773;R-HSA-1989770;R-HSA-1368065;R-HSA-1989771;R-HSA-1989768;R-HSA-1989767;R-HSA-1989764;R-HSA-1989765;R-HSA-1989762;R-HSA-1989760;R-HSA-1989761;R-HSA-1989758;R-HSA-1989759;R-HSA-879724;R-HSA-1989756;R-HSA-1989757;R-HSA-1989754;R-HSA-19897…
R-HSA-180689	APOBEC3G mediated resistance to HIV-1 infection	2	15	0.00107273	0.0679393	0.582727	3	3	0.000254496	9606	Homo sapiens	HMGA1;PPIF		R-HSA-180630;R-HSA-180634;R-HSA-180632
R-HSA-162592	Integration of provirus	2	15	0.00107273	0.0679393	0.582727	10	14	0.00118765	9606	Homo sapiens	HMGA1;PPIF		R-HSA-175250;R-HSA-164514;R-HSA-8951690;R-HSA-175174;R-HSA-175108;R-HSA-164522;R-HSA-173115;R-HSA-162590;R-HSA-164845;R-HSA-175117
R-HSA-975956	Nonsense Mediated Decay (NMD) independent of the Exon Junction Complex (EJC)	6	101	0.00722306	0.0691314	0.582727	1	1	8.4832e-05	9606	Homo sapiens	RPS28;RPS27;RPL31;RPL35A		R-HSA-927789
R-HSA-3928665	EPH-ephrin mediated repulsion of cells	4	55	0.00393335	0.0721815	0.582727	7	9	0.000763488	9606	Homo sapiens	LYN;APH1A;YES1;EPHA2		R-HSA-4093327;R-HSA-3928607;R-HSA-3928604;R-HSA-3928642;R-HSA-3928656;R-HSA-3928628;R-HSA-3928660
R-HSA-3656253	Defective EXT1 causes exostoses 1, TRPS2 and CHDS	2	16	0.00114425	0.0759169	0.582727	4	4	0.000339328	9606	Homo sapiens	EXT2;GPC1		R-HSA-9036283;R-HSA-3656261;R-HSA-9036285;R-HSA-3656257
R-HSA-3656237	Defective EXT2 causes exostoses 2	2	16	0.00114425	0.0759169	0.582727	4	4	0.000339328	9606	Homo sapiens	EXT2;GPC1		R-HSA-9036289;R-HSA-3656254;R-HSA-9036290;R-HSA-3656267
R-HSA-75892	Platelet Adhesion to exposed collagen	2	16	0.00114425	0.0759169	0.582727	3	6	0.000508992	9606	Homo sapiens	LYN;ITGA2		R-HSA-114577;R-HSA-432295;R-HSA-114563
R-HSA-156842	Eukaryotic Translation Elongation	6	104	0.0074376	0.0770384	0.582727	4	9	0.000763488	9606	Homo sapiens	RPS28;RPS27;RPL31;RPL35A		R-HSA-156915;R-HSA-156912;R-HSA-156923;R-HSA-156907
R-HSA-3359475	Defective MMAA causes methylmalonic aciduria type cblA	1	3	0.000214546	0.0812625	0.582727	1	1	8.4832e-05	9606	Homo sapiens	MUT		R-HSA-3322135
R-HSA-5619111	Defective SLC20A2 causes idiopathic basal ganglia calcification 1 (IBGC1)	1	3	0.000214546	0.0812625	0.582727	1	1	8.4832e-05	9606	Homo sapiens	SLC20A2		R-HSA-5625123
R-HSA-4549349	Defective ALG2 causes ALG2-CDG (CDG-1i)	1	3	0.000214546	0.0812625	0.582727	1	1	8.4832e-05	9606	Homo sapiens	ALG2		R-HSA-4549368
R-HSA-2206290	MPS IV - Morquio syndrome A	1	3	0.000214546	0.0812625	0.582727	1	1	8.4832e-05	9606	Homo sapiens	GALNS		R-HSA-2263490
R-HSA-72689	Formation of a pool of free 40S subunits	6	106	0.00758063	0.0825823	0.582727	2	2	0.000169664	9606	Homo sapiens	RPS28;RPS27;RPL31;RPL35A		R-HSA-72673;R-HSA-72676
R-HSA-381038	XBP1(S) activates chaperone genes	6	106	0.00758063	0.0825823	0.582727	3	48	0.00407194	9606	Homo sapiens	SEC61A1;GOSR2;SEC61G;PDIA6		R-HSA-1791131;R-HSA-5250579;R-HSA-1791154
R-HSA-1500931	Cell-Cell communication	7	133	0.00951155	0.0859471	0.582727	11	60	0.00508992	9606	Homo sapiens	ITGB4;CTNNB1;ITGA6;MPP5;F11R;MLLT4;INADL		R-HSA-420661;R-HSA-446083;R-HSA-432956;R-HSA-446077;R-HSA-432909;R-HSA-419981;R-HSA-433725;R-HSA-419002;R-HSA-419003;R-HSA-432952;R-HSA-446089
R-HSA-72764	Eukaryotic Translation Termination	6	108	0.00772366	0.0883426	0.582727	3	5	0.00042416	9606	Homo sapiens	RPS28;RPS27;RPL31;RPL35A		R-HSA-141671;R-HSA-141691;R-HSA-141673
R-HSA-1433559	Regulation of KIT signaling	2	18	0.00128728	0.0926879	0.582727	3	8	0.000678656	9606	Homo sapiens	LYN;YES1		R-HSA-205319;R-HSA-1433506;R-HSA-205244
R-HSA-111465	Apoptotic cleavage of cellular proteins	3	38	0.00271759	0.0940463	0.582727	3	38	0.00322362	9606	Homo sapiens	TJP1;CTNNB1;TJP2		R-HSA-351871;R-HSA-202969;R-HSA-351913
R-HSA-381070	IRE1alpha activates chaperones	6	110	0.0078667	0.0943171	0.582727	3	54	0.00458093	9606	Homo sapiens	SEC61A1;GOSR2;SEC61G;PDIA6		R-HSA-1791131;R-HSA-5250579;R-HSA-1791154
R-HSA-2173791	TGF-beta receptor signaling in EMT (epithelial to mesenchymal transition)	2	19	0.00135879	0.101439	0.582727	6	6	0.000508992	9606	Homo sapiens	CGN;F11R		R-HSA-2160931;R-HSA-2160932;R-HSA-2134532;R-HSA-2160935;R-HSA-2134519;R-HSA-2134506
R-HSA-2022928	HS-GAG biosynthesis	3	40	0.00286062	0.10543	0.582727	13	14	0.00118765	9606	Homo sapiens	EXT2;GPC1;HS2ST1		R-HSA-2076383;R-HSA-2076508;R-HSA-2076371;R-HSA-2024108;R-HSA-2022860;R-HSA-2022856;R-HSA-2076392;R-HSA-2022919;R-HSA-2022887;R-HSA-2024100;R-HSA-2076419;R-HSA-2076611;R-HSA-2022851
R-HSA-75108	Activation, myristolyation of BID and translocation to mitochondria	1	4	0.000286062	0.106859	0.582727	4	4	0.000339328	9606	Homo sapiens	BID		R-HSA-139920;R-HSA-141367;R-HSA-139893;R-HSA-139898
R-HSA-3359478	Defective MUT causes methylmalonic aciduria mut type	1	4	0.000286062	0.106859	0.582727	1	1	8.4832e-05	9606	Homo sapiens	MUT		R-HSA-3322971
R-HSA-192823	Viral mRNA Translation	6	114	0.00815276	0.106898	0.582727	2	2	0.000169664	9606	Homo sapiens	RPS28;RPS27;RPL31;RPL35A		R-HSA-192704;R-HSA-192841
R-HSA-2408557	Selenocysteine synthesis	6	116	0.00829579	0.113499	0.582727	2	7	0.000593824	9606	Homo sapiens	RPS28;RPS27;RPL31;RPL35A		R-HSA-2408529;R-HSA-5333615
R-HSA-202733	Cell surface interactions at the vascular wall	11	256	0.0183079	0.113777	0.582727	16	64	0.00542925	9606	Homo sapiens	LYN;YES1;ITGA3;CAV1;GPC1;BSG;PPIF;ATP1B3;ITGA6;ITGA5;F11R		R-HSA-202723;R-HSA-202726;R-HSA-204549;R-HSA-204485;R-HSA-8870732;R-HSA-204392;R-HSA-210291;R-HSA-114577;R-HSA-204434;R-HSA-204465;R-HSA-204500;R-HSA-375133;R-HSA-375135;R-HSA-204600;R-HSA-202718;R-HSA-375131
R-HSA-8866910	TFAP2 (AP-2) family regulates transcription of growth factors and their receptors	2	21	0.00150182	0.119574	0.582727	2	18	0.00152698	9606	Homo sapiens	EGFR		R-HSA-8874789;R-HSA-8874797
R-HSA-9033241	Peroxisomal protein import	4	67	0.00479153	0.123591	0.582727	4	26	0.00220563	9606	Homo sapiens	HMGCL;ACOX1;EHHADH;NUDT19		R-HSA-9033515;R-HSA-9033233;R-HSA-9033235;R-HSA-9033236
R-HSA-156827	L13a-mediated translational silencing of Ceruloplasmin expression	6	120	0.00858185	0.127301	0.582727	2	3	0.000254496	9606	Homo sapiens	RPS28;RPS27;RPL31;RPL35A		R-HSA-156823;R-HSA-156826
R-HSA-1614517	Sulfide oxidation to sulfate	2	22	0.00157334	0.128921	0.582727	3	6	0.000508992	9606	Homo sapiens	ETHE1;SQRDL		R-HSA-1614665;R-HSA-1614618;R-HSA-1614605
R-HSA-164938	Nef-mediates down modulation of cell surface receptors by recruiting them to clathrin adapters	2	22	0.00157334	0.128921	0.582727	4	15	0.00127248	9606	Homo sapiens	HLA-A;B2M		R-HSA-182243;R-HSA-182279;R-HSA-182263;R-HSA-182286
R-HSA-2028269	Signaling by Hippo	2	22	0.00157334	0.128921	0.582727	4	30	0.00254496	9606	Homo sapiens	TJP1;TJP2		R-HSA-2064406;R-HSA-2064421;R-HSA-2064418;R-HSA-2064417
R-HSA-212718	EGFR interacts with phospholipase C-gamma	1	5	0.000357577	0.131744	0.582727	3	3	0.000254496	9606	Homo sapiens	EGFR		R-HSA-212706;R-HSA-212710;R-HSA-212713
R-HSA-191647	c-src mediated regulation of Cx43 function and closure of gap junctions	1	5	0.000357577	0.131744	0.582727	3	4	0.000339328	9606	Homo sapiens	TJP1		R-HSA-191654;R-HSA-191636;R-HSA-190541
R-HSA-191650	Regulation of gap junction activity	1	5	0.000357577	0.131744	0.582727	3	4	0.000339328	9606	Homo sapiens	TJP1		R-HSA-191654;R-HSA-191636;R-HSA-190541
R-HSA-75157	FasL/ CD95L signaling	1	5	0.000357577	0.131744	0.582727	3	5	0.00042416	9606	Homo sapiens	FADD		R-HSA-83586;R-HSA-83650;R-HSA-141310
R-HSA-139910	Activation of BMF and translocation to mitochondria	1	5	0.000357577	0.131744	0.582727	1	2	0.000169664	9606	Homo sapiens	DYNLL2		R-HSA-139908
R-HSA-1268020	Mitochondrial protein import	4	69	0.00493456	0.133362	0.582727	8	14	0.00118765	9606	Homo sapiens	CHCHD2;PITRM1;GRPEL1;GRPEL2		R-HSA-1299475;R-HSA-1299478;R-HSA-1299476;R-HSA-1307802;R-HSA-1299482;R-HSA-1299480;R-HSA-8986181;R-HSA-1299487
R-HSA-1442490	Collagen degradation	4	69	0.00493456	0.133362	0.582727	3	34	0.00288429	9606	Homo sapiens	ADAM17;CTSL;CTSD;CTSB		R-HSA-2471621;R-HSA-2168960;R-HSA-2168923
R-HSA-72706	GTP hydrolysis and joining of the 60S ribosomal subunit	6	122	0.00872488	0.134494	0.582727	3	3	0.000254496	9606	Homo sapiens	RPS28;RPS27;RPL31;RPL35A		R-HSA-72672;R-HSA-72619;R-HSA-72671
R-HSA-2046106	alpha-linolenic acid (ALA) metabolism	3	45	0.00321819	0.136038	0.582727	4	15	0.00127248	9606	Homo sapiens	ELOVL5;ACSL1;ACOX1		R-HSA-2046088;R-HSA-2046085;R-HSA-2046100;R-HSA-2066787
R-HSA-8875878	MET promotes cell motility	3	45	0.00321819	0.136038	0.582727	3	12	0.00101798	9606	Homo sapiens	ITGA3;ITGA2;DOCK7		R-HSA-8875591;R-HSA-8874079;R-HSA-8875576
R-HSA-5625900	RHO GTPases activate CIT	2	23	0.00164485	0.138431	0.582727	1	6	0.000508992	9606	Homo sapiens	MYL6;MYH9		R-HSA-5671919
R-HSA-927802	Nonsense-Mediated Decay (NMD)	6	124	0.00886791	0.141875	0.582727	5	6	0.000508992	9606	Homo sapiens	RPS28;RPS27;RPL31;RPL35A		R-HSA-927836;R-HSA-927789;R-HSA-927832;R-HSA-927813;R-HSA-927889
R-HSA-975957	Nonsense Mediated Decay (NMD) enhanced by the Exon Junction Complex (EJC)	6	124	0.00886791	0.141875	0.582727	4	5	0.00042416	9606	Homo sapiens	RPS28;RPS27;RPL31;RPL35A		R-HSA-927836;R-HSA-927832;R-HSA-927813;R-HSA-927889
R-HSA-912631	Regulation of signaling by CBL	2	24	0.00171637	0.148088	0.582727	3	7	0.000593824	9606	Homo sapiens	LYN;YES1		R-HSA-879917;R-HSA-912629;R-HSA-912627
R-HSA-5627117	RHO GTPases Activate ROCKs	2	24	0.00171637	0.148088	0.582727	2	6	0.000508992	9606	Homo sapiens	MYL6;MYH9		R-HSA-419232;R-HSA-419197
R-HSA-77111	Synthesis of Ketone Bodies	2	24	0.00171637	0.148088	0.582727	2	8	0.000678656	9606	Homo sapiens	HMGCL;BDH1		R-HSA-74180;R-HSA-73912
R-HSA-416572	Sema4D induced cell migration and growth-cone collapse	2	24	0.00171637	0.148088	0.582727	1	6	0.000508992	9606	Homo sapiens	MYL6;MYH9		R-HSA-419197
R-HSA-389661	Glyoxylate metabolism and glycine degradation	4	73	0.00522063	0.153804	0.582727	2	23	0.00195114	9606	Homo sapiens	ALDH4A1;BCKDHA;BCKDHB;DLST		R-HSA-6784399;R-HSA-6792572
R-HSA-422475	Axon guidance	21	583	0.0416935	0.154858	0.582727	33	297	0.0251951	9606	Homo sapiens	LYN;PRNP;YES1;RPL31;USP33;ITGA2;RPL35A;EGFR;MYL12A;APH1A;RPS28;MYL6;RPS27;ALCAM;GPC1;NUMB;MYH9;ITGA5;EPHA2		R-HSA-443783;R-HSA-443780;R-HSA-3928627;R-HSA-445069;R-HSA-3928628;R-HSA-3928616;R-HSA-3928623;R-HSA-9014610;R-HSA-374686;R-HSA-428518;R-HSA-3928602;R-HSA-3928607;R-HSA-445088;R-HSA-4093336;R-HSA-3928604;R-HSA-8986083;R-HSA-3928656;R-HSA-3928597;R-HSA-3928660;R-HSA-3928651;R-HSA-4093327;R-HSA-3928584;R-HSA-3928648;R-HSA-3928591;R-HSA-9014652;R-HSA-375154;R-HSA-3928642;R-HSA-3928578;R-HSA-419197;R…
R-HSA-5638302	Signaling by Overexpressed Wild-Type EGFR in Cancer	1	6	0.000429092	0.155937	0.582727	2	2	0.000169664	9606	Homo sapiens	EGFR		R-HSA-1248677;R-HSA-1225978
R-HSA-1251932	PLCG1 events in ERBB2 signaling	1	6	0.000429092	0.155937	0.582727	2	2	0.000169664	9606	Homo sapiens	EGFR		R-HSA-1251922;R-HSA-1251944
R-HSA-5638303	Inhibition of Signaling by Overexpressed EGFR	1	6	0.000429092	0.155937	0.582727	2	2	0.000169664	9606	Homo sapiens	EGFR		R-HSA-1248677;R-HSA-1225978
R-HSA-9013957	TLR3-mediated TICAM1-dependent programmed cell death	1	6	0.000429092	0.155937	0.582727	2	3	0.000254496	9606	Homo sapiens	FADD		R-HSA-9013889;R-HSA-9013895
R-HSA-162594	Early Phase of HIV Life Cycle	2	25	0.00178789	0.157876	0.582727	34	38	0.00322362	9606	Homo sapiens	HMGA1;PPIF		R-HSA-8951690;R-HSA-175174;R-HSA-175108;R-HSA-173642;R-HSA-173771;R-HSA-182795;R-HSA-182859;R-HSA-173769;R-HSA-175117;R-HSA-175250;R-HSA-164503;R-HSA-164500;R-HSA-164507;R-HSA-164504;R-HSA-164505;R-HSA-164510;R-HSA-162590;R-HSA-182876;R-HSA-164508;R-HSA-164509;R-HSA-164514;R-HSA-164515;R-HSA-164512;R-HSA-164513;R-HSA-164519;R-HSA-164522;R-HSA-164520;R-HSA-164521;R-HSA-164527;R-HSA-164524;R-HSA-16…
R-HSA-389513	CTLA4 inhibitory signaling	2	25	0.00178789	0.157876	0.582727	2	5	0.00042416	9606	Homo sapiens	LYN;YES1		R-HSA-388833;R-HSA-388829
R-HSA-445144	Signal transduction by L1	2	25	0.00178789	0.157876	0.582727	2	11	0.000933152	9606	Homo sapiens	ITGA5;EGFR		R-HSA-445069;R-HSA-374686
R-HSA-913709	O-linked glycosylation of mucins	4	74	0.00529214	0.15909	0.582727	2	17	0.00144214	9606	Homo sapiens	GALNT7;GALNT6;C1GALT1;GALNT10		R-HSA-1964505;R-HSA-913675
R-HSA-72613	Eukaryotic Translation Initiation	6	131	0.00936852	0.169116	0.582727	12	21	0.00178147	9606	Homo sapiens	RPS28;RPS27;RPL31;RPL35A		R-HSA-72673;R-HSA-72672;R-HSA-72691;R-HSA-72676;R-HSA-156823;R-HSA-72697;R-HSA-156826;R-HSA-72619;R-HSA-156808;R-HSA-157849;R-HSA-72621;R-HSA-72671
R-HSA-72737	Cap-dependent Translation Initiation	6	131	0.00936852	0.169116	0.582727	10	18	0.00152698	9606	Homo sapiens	RPS28;RPS27;RPL31;RPL35A		R-HSA-72673;R-HSA-72672;R-HSA-72691;R-HSA-72676;R-HSA-72697;R-HSA-72619;R-HSA-156808;R-HSA-157849;R-HSA-72621;R-HSA-72671
R-HSA-71403	Citric acid cycle (TCA cycle)	3	50	0.00357577	0.169258	0.582727	3	17	0.00144214	9606	Homo sapiens	IDH2;DLST		R-HSA-70967;R-HSA-71401;R-HSA-450984
R-HSA-72766	Translation	13	340	0.0243152	0.169946	0.582727	39	99	0.00839837	9606	Homo sapiens	MRPL30;SEC61A1;RPS28;MRPL1;RPS27;MRPS14;RPL31;SEC61G;MARS2;RPL35A;HARS2		R-HSA-5389842;R-HSA-5419281;R-HSA-1799326;R-HSA-5368279;R-HSA-5389848;R-HSA-156808;R-HSA-5389849;R-HSA-380234;R-HSA-5419264;R-HSA-5419271;R-HSA-156823;R-HSA-156826;R-HSA-5419273;R-HSA-157849;R-HSA-5419279;R-HSA-5389839;R-HSA-72671;R-HSA-5419277;R-HSA-72673;R-HSA-72672;R-HSA-72676;R-HSA-141671;R-HSA-156907;R-HSA-72619;R-HSA-141673;R-HSA-72621;R-HSA-5419261;R-HSA-156915;R-HSA-156912;R-HSA-72691;R-H…
R-HSA-1474290	Collagen formation	5	104	0.0074376	0.173751	0.582727	2	77	0.00653207	9606	Homo sapiens	CTSL;ITGB4;ITGA6;CTSB		R-HSA-2213200;R-HSA-2213192
R-HSA-75876	Synthesis of very long-chain fatty acyl-CoAs	3	51	0.00364729	0.176164	0.582727	3	12	0.00101798	9606	Homo sapiens	ELOVL5;ACSL1;SLC27A3		R-HSA-8875077;R-HSA-201035;R-HSA-548800
R-HSA-5627123	RHO GTPases activate PAKs	2	27	0.00193092	0.17779	0.582727	3	15	0.00127248	9606	Homo sapiens	MYL6;MYH9		R-HSA-5668932;R-HSA-5668978;R-HSA-419232
R-HSA-77289	Mitochondrial Fatty Acid Beta-Oxidation	5	105	0.00750912	0.178424	0.582727	7	47	0.00398711	9606	Homo sapiens	ACADM;MUT;MCAT;ACAD10;ACSF2		R-HSA-77345;R-HSA-5696004;R-HSA-71010;R-HSA-8933547;R-HSA-5695980;R-HSA-77338;R-HSA-109341
R-HSA-3134973	LRR FLII-interacting protein 1 (LRRFIP1) activates type I IFN production	1	7	0.000500608	0.179458	0.582727	4	5	0.00042416	9606	Homo sapiens	CTNNB1		R-HSA-3134904;R-HSA-3134901;R-HSA-3134883;R-HSA-3134914
R-HSA-1566977	Fibronectin matrix formation	1	7	0.000500608	0.179458	0.582727	2	3	0.000254496	9606	Homo sapiens	ITGA5		R-HSA-202723;R-HSA-2327746
R-HSA-69478	G2/M DNA replication checkpoint	1	7	0.000500608	0.179458	0.582727	1	2	0.000169664	9606	Homo sapiens	PKMYT1		R-HSA-170055
R-HSA-75105	Fatty acyl-CoA biosynthesis	4	79	0.00564972	0.18647	0.582727	4	24	0.00203597	9606	Homo sapiens	ELOVL5;SCD;ACSL1;SLC27A3		R-HSA-8875077;R-HSA-5690565;R-HSA-201035;R-HSA-548800
R-HSA-74182	Ketone body metabolism	2	28	0.00200243	0.187887	0.582727	3	11	0.000933152	9606	Homo sapiens	HMGCL;BDH1		R-HSA-73920;R-HSA-74180;R-HSA-73912
R-HSA-9013507	NOTCH3 Activation and Transmission of Signal to the Nucleus	2	28	0.00200243	0.187887	0.582727	4	15	0.00127248	9606	Homo sapiens	APH1A;EGFR		R-HSA-9017817;R-HSA-9018573;R-HSA-9018572;R-HSA-9013361
R-HSA-168254	Influenza Infection	8	197	0.0140885	0.197321	0.582727	4	60	0.00508992	9606	Homo sapiens	RPS28;RPS27;RPL31;SPAG1;RPL35A;ISG15		R-HSA-192704;R-HSA-168326;R-HSA-1176059;R-HSA-192841
R-HSA-72695	Formation of the ternary complex, and subsequently, the 43S complex	3	54	0.00386183	0.197329	0.582727	1	3	0.000254496	9606	Homo sapiens	RPS28;RPS27		R-HSA-72691
R-HSA-75153	Apoptotic execution phase	3	54	0.00386183	0.197329	0.582727	3	57	0.00483543	9606	Homo sapiens	TJP1;CTNNB1;TJP2		R-HSA-351871;R-HSA-202969;R-HSA-351913
R-HSA-8957275	Post-translational protein phosphorylation	5	109	0.00779518	0.197575	0.582727	1	1	8.4832e-05	9606	Homo sapiens	GOLM1;MFI2;FUCA2;PDIA6;CYR61		R-HSA-8952289
R-HSA-5621575	CD209 (DC-SIGN) signaling	2	29	0.00207395	0.198061	0.582727	3	11	0.000933152	9606	Homo sapiens	LYN;RAF1		R-HSA-5624486;R-HSA-5624492;R-HSA-5624494
R-HSA-164952	The role of Nef in HIV-1 replication and disease pathogenesis	2	29	0.00207395	0.198061	0.582727	4	20	0.00169664	9606	Homo sapiens	HLA-A;B2M		R-HSA-182243;R-HSA-182279;R-HSA-182263;R-HSA-182286
R-HSA-982772	Growth hormone receptor signaling	2	29	0.00207395	0.198061	0.582727	3	28	0.0023753	9606	Homo sapiens	LYN;ADAM17		R-HSA-1168777;R-HSA-1168456;R-HSA-1168459
R-HSA-8957322	Metabolism of steroids	12	321	0.0229564	0.201395	0.582727	19	234	0.0198507	9606	Homo sapiens	LYN;SQLE;STARD3;NSDHL;SCD;DHCR24;MSMO1;LGMN;FDFT1		R-HSA-191299;R-HSA-2426151;R-HSA-196417;R-HSA-2426146;R-HSA-191402;R-HSA-1655826;R-HSA-350158;R-HSA-194669;R-HSA-191405;R-HSA-1655849;R-HSA-194642;R-HSA-1655848;R-HSA-194641;R-HSA-1655850;R-HSA-6800052;R-HSA-196126;R-HSA-194718;R-HSA-1655844;R-HSA-6807064
R-HSA-164525	Plus-strand DNA synthesis	1	8	0.000572123	0.202324	0.582727	4	4	0.000339328	9606	Homo sapiens	PPIF		R-HSA-164512;R-HSA-164513;R-HSA-164505;R-HSA-173769
R-HSA-75158	TRAIL signaling	1	8	0.000572123	0.202324	0.582727	3	6	0.000508992	9606	Homo sapiens	FADD		R-HSA-75187;R-HSA-141316;R-HSA-75146
R-HSA-9017802	Noncanonical activation of NOTCH3	1	8	0.000572123	0.202324	0.582727	1	2	0.000169664	9606	Homo sapiens	APH1A		R-HSA-9017817
R-HSA-5674499	Negative feedback regulation of MAPK pathway	1	8	0.000572123	0.202324	0.582727	1	3	0.000254496	9606	Homo sapiens	RAF1		R-HSA-5675194
R-HSA-5362798	Release of Hh-Np from the secreting cell	1	8	0.000572123	0.202324	0.582727	1	5	0.00042416	9606	Homo sapiens	ADAM17		R-HSA-5362793
R-HSA-2660826	Constitutive Signaling by NOTCH1 t(7;9)(NOTCH1:M1580_K2555) Translocation Mutant	1	8	0.000572123	0.202324	0.582727	1	5	0.00042416	9606	Homo sapiens	ADAM17		R-HSA-2666278
R-HSA-2660825	Signaling by NOTCH1 t(7;9)(NOTCH1:M1580_K2555) Translocation Mutant	1	8	0.000572123	0.202324	0.582727	1	5	0.00042416	9606	Homo sapiens	ADAM17		R-HSA-2666278
R-HSA-9033500	TYSND1 cleaves peroxisomal proteins	1	8	0.000572123	0.202324	0.582727	1	7	0.000593824	9606	Homo sapiens	ACOX1		R-HSA-9033515
R-HSA-2046104	alpha-linolenic (omega3) and linoleic (omega6) acid metabolism	3	55	0.00393335	0.204516	0.582727	7	25	0.0021208	9606	Homo sapiens	ELOVL5;ACSL1;ACOX1		R-HSA-2046094;R-HSA-2046088;R-HSA-2046085;R-HSA-2046100;R-HSA-2066787;R-HSA-2046083;R-HSA-2046098
R-HSA-400685	Sema4D in semaphorin signaling	2	30	0.00214546	0.208299	0.582727	1	12	0.00101798	9606	Homo sapiens	MYL6;MYH9		R-HSA-419197
R-HSA-5601884	PIWI-interacting RNA (piRNA) biogenesis	2	31	0.00221698	0.218591	0.582727	8	15	0.00127248	9606	Homo sapiens	TDRKH;SPAG1		R-HSA-5629237;R-HSA-5601926;R-HSA-5601888;R-HSA-5629203;R-HSA-5615682;R-HSA-5601919;R-HSA-5601897;R-HSA-5601883
R-HSA-204174	Regulation of pyruvate dehydrogenase (PDH) complex	2	31	0.00221698	0.218591	0.582727	2	4	0.000339328	9606	Homo sapiens	PDP1;GSTZ1		R-HSA-9011595;R-HSA-204169
R-HSA-70268	Pyruvate metabolism	3	57	0.00407638	0.219066	0.582727	4	15	0.00127248	9606	Homo sapiens	PDP1;GSTZ1;BSG		R-HSA-9011595;R-HSA-373875;R-HSA-204169;R-HSA-373867
R-HSA-168273	Influenza Viral RNA Transcription and Replication	7	173	0.0123722	0.220494	0.582727	3	15	0.00127248	9606	Homo sapiens	RPS28;RPS27;RPL31;SPAG1;RPL35A		R-HSA-192704;R-HSA-168326;R-HSA-192841
R-HSA-1474244	Extracellular matrix organization	12	329	0.0235286	0.224282	0.582727	36	318	0.0269766	9606	Homo sapiens	ADAM17;CTSL;ITGB4;ITGA3;ITGA2;BSG;ITGA6;ITGA5;F11R;CTSD;CTSB		R-HSA-114563;R-HSA-2473511;R-HSA-2328037;R-HSA-1604752;R-HSA-2467436;R-HSA-4084910;R-HSA-204434;R-HSA-265429;R-HSA-265424;R-HSA-375135;R-HSA-202718;R-HSA-3814820;R-HSA-2471621;R-HSA-202723;R-HSA-2327746;R-HSA-2168960;R-HSA-4088220;R-HSA-4085083;R-HSA-3907292;R-HSA-2213192;R-HSA-2731074;R-HSA-216040;R-HSA-2681667;R-HSA-2327695;R-HSA-216051;R-HSA-2213200;R-HSA-2514772;R-HSA-1592362;R-HSA-216048;R-H…
R-HSA-8857538	PTK6 promotes HIF1A stabilization	1	9	0.000643639	0.224556	0.582727	5	5	0.00042416	9606	Homo sapiens	EGFR		R-HSA-8857555;R-HSA-8857583;R-HSA-8857565;R-HSA-8857549;R-HSA-8857577
R-HSA-9027283	Erythropoietin activates STAT5	1	9	0.000643639	0.224556	0.582727	3	3	0.000254496	9606	Homo sapiens	LYN		R-HSA-9012651;R-HSA-9012650;R-HSA-9012654
R-HSA-177539	Autointegration results in viral DNA circles	1	9	0.000643639	0.224556	0.582727	2	2	0.000169664	9606	Homo sapiens	HMGA1		R-HSA-175250;R-HSA-164845
R-HSA-162585	Uncoating of the HIV Virion	1	9	0.000643639	0.224556	0.582727	2	2	0.000169664	9606	Homo sapiens	PPIF		R-HSA-173111;R-HSA-173642
R-HSA-179812	GRB2 events in EGFR signaling	1	9	0.000643639	0.224556	0.582727	2	3	0.000254496	9606	Homo sapiens	EGFR		R-HSA-177938;R-HSA-177943
R-HSA-175567	Integration of viral DNA into host genomic DNA	1	9	0.000643639	0.224556	0.582727	1	3	0.000254496	9606	Homo sapiens	HMGA1		R-HSA-175108
R-HSA-426486	Small interfering RNA (siRNA) biogenesis	1	9	0.000643639	0.224556	0.582727	1	5	0.00042416	9606	Homo sapiens	MLLT4		R-HSA-9023909
R-HSA-525793	Myogenesis	2	32	0.00228849	0.228925	0.582727	8	14	0.00118765	9606	Homo sapiens	CTNNB1;CTNNA2		R-HSA-376117;R-HSA-448951;R-HSA-375140;R-HSA-376119;R-HSA-449200;R-HSA-448958;R-HSA-448957;R-HSA-376121
R-HSA-375170	CDO in myogenesis	2	32	0.00228849	0.228925	0.582727	8	14	0.00118765	9606	Homo sapiens	CTNNB1;CTNNA2		R-HSA-376117;R-HSA-448951;R-HSA-375140;R-HSA-376119;R-HSA-449200;R-HSA-448958;R-HSA-448957;R-HSA-376121
R-HSA-2046105	Linoleic acid (LA) metabolism	2	32	0.00228849	0.228925	0.582727	3	10	0.00084832	9606	Homo sapiens	ELOVL5;ACSL1		R-HSA-2046094;R-HSA-2046083;R-HSA-2046098
R-HSA-8874081	MET activates PTK2 signaling	2	32	0.00228849	0.228925	0.582727	1	5	0.00042416	9606	Homo sapiens	ITGA3;ITGA2		R-HSA-8874079
R-HSA-6806834	Signaling by MET	4	87	0.00622184	0.233046	0.582727	4	49	0.00415677	9606	Homo sapiens	ITGA3;ITGA2;DOCK7;PTPN2		R-HSA-8875591;R-HSA-6807027;R-HSA-8874079;R-HSA-8875576
R-HSA-73863	RNA Polymerase I Transcription Termination	2	33	0.00236001	0.23929	0.582727	3	4	0.000339328	9606	Homo sapiens	SPAG1;PTRF		R-HSA-74993;R-HSA-74992;R-HSA-74994
R-HSA-4641262	Disassembly of the destruction complex and recruitment of AXIN to the membrane	2	33	0.00236001	0.23929	0.582727	3	7	0.000593824	9606	Homo sapiens	CAV1;CTNNB1		R-HSA-5368596;R-HSA-201685;R-HSA-3601585
R-HSA-6803204	TP53 Regulates Transcription of Genes Involved in Cytochrome C Release	2	33	0.00236001	0.23929	0.582727	2	25	0.0021208	9606	Homo sapiens	BID		R-HSA-6791285;R-HSA-6791291
R-HSA-71291	Metabolism of amino acids and derivatives	22	660	0.0472002	0.242839	0.582727	24	283	0.0240075	9606	Homo sapiens	BCKDHA;OAT;SLC44A1;RPL31;GPT2;CCBL2;BCKDHB;RPL35A;DLST;SQRDL;ACADSB;HRSP12;ALDH4A1;BCKDK;GSTZ1;RPS28;ALDH6A1;RPS27;ETHE1		R-HSA-1614618;R-HSA-507749;R-HSA-6797956;R-HSA-901097;R-HSA-71173;R-HSA-6784399;R-HSA-5693148;R-HSA-70666;R-HSA-70893;R-HSA-1614665;R-HSA-70800;R-HSA-1614605;R-HSA-2408529;R-HSA-70679;R-HSA-5693153;R-HSA-507775;R-HSA-9014641;R-HSA-70713;R-HSA-70523;R-HSA-6792572;R-HSA-71037;R-HSA-70524;R-HSA-5333615;R-HSA-70654
R-HSA-2132295	MHC class II antigen presentation	6	148	0.0105843	0.243013	0.582727	5	26	0.00220563	9606	Homo sapiens	CTSL;CTSD;DYNLL2;LGMN;CTSB		R-HSA-2130336;R-HSA-2213248;R-HSA-2130706;R-HSA-2130504;R-HSA-2130349
R-HSA-1474228	Degradation of the extracellular matrix	6	148	0.0105843	0.243013	0.582727	8	105	0.00890736	9606	Homo sapiens	ADAM17;CTSL;BSG;CTSD;CTSB		R-HSA-2471621;R-HSA-2168960;R-HSA-2514772;R-HSA-1592362;R-HSA-1604752;R-HSA-2168923;R-HSA-375135;R-HSA-3814820
R-HSA-6796648	TP53 Regulates Transcription of DNA Repair Genes	4	89	0.00636487	0.245113	0.582727	3	17	0.00144214	9606	Homo sapiens	MDC1;SPAG1		R-HSA-6797606;R-HSA-6797616;R-HSA-6797712
R-HSA-162589	Reverse Transcription of HIV RNA	1	10	0.000715154	0.246169	0.582727	11	11	0.000933152	9606	Homo sapiens	PPIF		R-HSA-164528;R-HSA-164512;R-HSA-164513;R-HSA-164503;R-HSA-164519;R-HSA-182795;R-HSA-182859;R-HSA-164520;R-HSA-164504;R-HSA-164505;R-HSA-173769
R-HSA-164516	Minus-strand DNA synthesis	1	10	0.000715154	0.246169	0.582727	7	7	0.000593824	9606	Homo sapiens	PPIF		R-HSA-164528;R-HSA-164503;R-HSA-164519;R-HSA-182795;R-HSA-182859;R-HSA-164520;R-HSA-164504
R-HSA-8951430	RUNX3 regulates WNT signaling	1	10	0.000715154	0.246169	0.582727	5	5	0.00042416	9606	Homo sapiens	CTNNB1		R-HSA-4411367;R-HSA-8951442;R-HSA-8951443;R-HSA-8951428;R-HSA-4411357
R-HSA-203641	NOSTRIN mediated eNOS trafficking	1	10	0.000715154	0.246169	0.582727	4	4	0.000339328	9606	Homo sapiens	CAV1		R-HSA-203716;R-HSA-203625;R-HSA-203662;R-HSA-203565
R-HSA-4411364	Binding of TCF/LEF:CTNNB1 to target gene promoters	1	10	0.000715154	0.246169	0.582727	4	4	0.000339328	9606	Homo sapiens	CTNNB1		R-HSA-4411351;R-HSA-4411367;R-HSA-4411357;R-HSA-4411372
R-HSA-162791	Attachment of GPI anchor to uPAR	1	10	0.000715154	0.246169	0.582727	2	2	0.000169664	9606	Homo sapiens	PLAUR		R-HSA-162836;R-HSA-162729
R-HSA-2562578	TRIF-mediated programmed cell death	1	10	0.000715154	0.246169	0.582727	2	3	0.000254496	9606	Homo sapiens	FADD		R-HSA-2562564;R-HSA-2562541
R-HSA-8948747	Regulation of PTEN localization	1	10	0.000715154	0.246169	0.582727	1	4	0.000339328	9606	Homo sapiens	PML		R-HSA-6807118
R-HSA-447041	CHL1 interactions	1	10	0.000715154	0.246169	0.582727	1	5	0.00042416	9606	Homo sapiens	ITGA2		R-HSA-445088
R-HSA-8866654	E3 ubiquitin ligases ubiquitinate target proteins	3	61	0.00436244	0.248743	0.582727	2	16	0.00135731	9606	Homo sapiens	HLA-B;HLA-A		R-HSA-8943080;R-HSA-8943083
R-HSA-1236394	Signaling by ERBB4	3	61	0.00436244	0.248743	0.582727	3	37	0.00313879	9606	Homo sapiens	APH1A;ADAM17;EGFR		R-HSA-1977959;R-HSA-1251992;R-HSA-1251997
R-HSA-3000171	Non-integrin membrane-ECM interactions	3	61	0.00436244	0.248743	0.582727	1	22	0.0018663	9606	Homo sapiens	ITGB4;ITGA2;ITGA6		R-HSA-2731074
R-HSA-418990	Adherens junctions interactions	2	35	0.00250304	0.260079	0.582727	3	16	0.00135731	9606	Homo sapiens	CTNNB1;MLLT4		R-HSA-433725;R-HSA-419002;R-HSA-419003
R-HSA-2022377	Metabolism of Angiotensinogen to Angiotensins	2	35	0.00250304	0.260079	0.582727	3	17	0.00144214	9606	Homo sapiens	CTSZ;CTSD		R-HSA-2022412;R-HSA-2022381;R-HSA-2022403
R-HSA-1251985	Nuclear signaling by ERBB4	2	35	0.00250304	0.260079	0.582727	2	22	0.0018663	9606	Homo sapiens	APH1A;ADAM17		R-HSA-1251992;R-HSA-1251997
R-HSA-9010553	Regulation of expression of SLITs and ROBOs	7	183	0.0130873	0.262166	0.582727	3	20	0.00169664	9606	Homo sapiens	RPS28;RPS27;RPL31;USP33;RPL35A		R-HSA-9014652;R-HSA-8986083;R-HSA-9014610
R-HSA-72649	Translation initiation complex formation	3	63	0.00450547	0.263805	0.582727	2	2	0.000169664	9606	Homo sapiens	RPS28;RPS27		R-HSA-156808;R-HSA-157849
R-HSA-3371378	Regulation by c-FLIP	1	11	0.00078667	0.267181	0.582727	4	4	0.000339328	9606	Homo sapiens	FADD		R-HSA-3371360;R-HSA-3465459;R-HSA-3465448;R-HSA-3371359
R-HSA-69416	Dimerization of procaspase-8	1	11	0.00078667	0.267181	0.582727	3	3	0.000254496	9606	Homo sapiens	FADD		R-HSA-141159;R-HSA-141156;R-HSA-73945
R-HSA-111453	BH3-only proteins associate with and inactivate anti-apoptotic BCL-2 members	1	11	0.00078667	0.267181	0.582727	2	4	0.000339328	9606	Homo sapiens	BID		R-HSA-114352;R-HSA-508162
R-HSA-425986	Sodium/Proton exchangers	1	11	0.00078667	0.267181	0.582727	1	4	0.000339328	9606	Homo sapiens	SLC9A1		R-HSA-425994
R-HSA-936440	Negative regulators of DDX58/IFIH1 signaling	2	36	0.00257455	0.270484	0.582727	8	13	0.00110282	9606	Homo sapiens	MAVS;ISG15		R-HSA-936462;R-HSA-990526;R-HSA-936381;R-HSA-936378;R-HSA-936475;R-HSA-936564;R-HSA-936563;R-HSA-990528
R-HSA-114452	Activation of BH3-only proteins	2	36	0.00257455	0.270484	0.582727	2	19	0.00161181	9606	Homo sapiens	BID;DYNLL2		R-HSA-139908;R-HSA-139897
R-HSA-9008059	Interleukin-37 signaling	2	36	0.00257455	0.270484	0.582727	1	14	0.00118765	9606	Homo sapiens	PTPN2		R-HSA-9008894
R-HSA-168255	Influenza Life Cycle	7	186	0.0133019	0.275089	0.582727	3	52	0.00441127	9606	Homo sapiens	RPS28;RPS27;RPL31;SPAG1;RPL35A		R-HSA-192704;R-HSA-168326;R-HSA-192841
R-HSA-5694530	Cargo concentration in the ER	2	37	0.00264607	0.280885	0.582727	3	12	0.00101798	9606	Homo sapiens	GOSR2;CTSZ		R-HSA-5694428;R-HSA-5694413;R-HSA-5694522
R-HSA-72702	Ribosomal scanning and start codon recognition	3	66	0.00472002	0.286594	0.582727	2	2	0.000169664	9606	Homo sapiens	RPS28;RPS27		R-HSA-72697;R-HSA-72621
R-HSA-8979227	Triglyceride metabolism	3	66	0.00472002	0.286594	0.582727	3	24	0.00203597	9606	Homo sapiens	PPP1CC;DGAT1;CAV1		R-HSA-163568;R-HSA-163418;R-HSA-75900
R-HSA-180336	SHC1 events in EGFR signaling	1	12	0.000858185	0.287609	0.582727	4	4	0.000339328	9606	Homo sapiens	EGFR		R-HSA-177936;R-HSA-177925;R-HSA-177945;R-HSA-177933
R-HSA-433692	Proton-coupled monocarboxylate transport	1	12	0.000858185	0.287609	0.582727	1	1	8.4832e-05	9606	Homo sapiens	BSG		R-HSA-433698
R-HSA-2179392	EGFR Transactivation by Gastrin	1	12	0.000858185	0.287609	0.582727	3	6	0.000508992	9606	Homo sapiens	EGFR		R-HSA-2179415;R-HSA-2179387;R-HSA-2179407
R-HSA-190873	Gap junction degradation	1	12	0.000858185	0.287609	0.582727	2	4	0.000339328	9606	Homo sapiens	MYO6		R-HSA-190519;R-HSA-190829
R-HSA-430116	GP1b-IX-V activation signalling	1	12	0.000858185	0.287609	0.582727	2	7	0.000593824	9606	Homo sapiens	RAF1		R-HSA-443831;R-HSA-443439
R-HSA-9013700	NOTCH4 Activation and Transmission of Signal to the Nucleus	1	12	0.000858185	0.287609	0.582727	1	5	0.00042416	9606	Homo sapiens	APH1A		R-HSA-9604294
R-HSA-450520	HuR (ELAVL1) binds and stabilizes mRNA	1	12	0.000858185	0.287609	0.582727	1	7	0.000593824	9606	Homo sapiens	GPRC5A		R-HSA-450595
R-HSA-8851680	Butyrophilin (BTN) family interactions	1	12	0.000858185	0.287609	0.582727	1	8	0.000678656	9606	Homo sapiens	PPL		R-HSA-8938431
R-HSA-381426	Regulation of Insulin-like Growth Factor (IGF) transport and uptake by Insulin-like Growth Factor Binding Proteins (IGFBPs)	5	127	0.00908246	0.290825	0.582727	1	14	0.00118765	9606	Homo sapiens	GOLM1;MFI2;FUCA2;PDIA6;CYR61		R-HSA-8952289
R-HSA-390247	Beta-oxidation of very long chain fatty acids	2	38	0.00271759	0.291274	0.582727	3	12	0.00101798	9606	Homo sapiens	ACOX1;EHHADH		R-HSA-390256;R-HSA-6809264;R-HSA-6809263
R-HSA-72662	Activation of the mRNA upon binding of the cap-binding complex and eIFs, and subsequent binding to 43S	3	67	0.00479153	0.294227	0.582727	2	6	0.000508992	9606	Homo sapiens	RPS28;RPS27		R-HSA-156808;R-HSA-157849
R-HSA-381119	Unfolded Protein Response (UPR)	6	160	0.0114425	0.299975	0.582727	3	95	0.00805904	9606	Homo sapiens	SEC61A1;GOSR2;SEC61G;PDIA6		R-HSA-1791131;R-HSA-5250579;R-HSA-1791154
R-HSA-445355	Smooth Muscle Contraction	2	39	0.0027891	0.301643	0.582727	5	9	0.000763488	9606	Homo sapiens	MYL6;MYL12A		R-HSA-445700;R-HSA-445813;R-HSA-445699;R-HSA-445704;R-HSA-445705
R-HSA-3781860	Diseases associated with N-glycosylation of proteins	2	39	0.0027891	0.301643	0.582727	2	23	0.00195114	9606	Homo sapiens	RFT1;ALG2		R-HSA-4570573;R-HSA-4549368
R-HSA-389356	CD28 co-stimulation	2	39	0.0027891	0.301643	0.582727	1	19	0.00161181	9606	Homo sapiens	LYN;YES1		R-HSA-388831
R-HSA-373760	L1CAM interactions	5	130	0.009297	0.307145	0.582727	5	54	0.00458093	9606	Homo sapiens	ALCAM;ITGA2;NUMB;ITGA5;EGFR		R-HSA-443783;R-HSA-443780;R-HSA-445088;R-HSA-445069;R-HSA-374686
R-HSA-173107	Binding and entry of HIV virion	1	13	0.0009297	0.307469	0.582727	8	8	0.000678656	9606	Homo sapiens	PPIF		R-HSA-164515;R-HSA-164500;R-HSA-164507;R-HSA-164521;R-HSA-164510;R-HSA-164524;R-HSA-164508;R-HSA-164509
R-HSA-9027277	Erythropoietin activates Phospholipase C gamma (PLCG)	1	13	0.0009297	0.307469	0.582727	3	3	0.000254496	9606	Homo sapiens	LYN		R-HSA-9027373;R-HSA-9032478;R-HSA-9027425
R-HSA-380612	Metabolism of serotonin	1	13	0.0009297	0.307469	0.582727	1	2	0.000169664	9606	Homo sapiens	ALDH2		R-HSA-380608
R-HSA-8875555	MET activates RAP1 and RAC1	1	13	0.0009297	0.307469	0.582727	2	5	0.00042416	9606	Homo sapiens	DOCK7		R-HSA-8875591;R-HSA-8875576
R-HSA-164843	2-LTR circle formation	1	13	0.0009297	0.307469	0.582727	1	3	0.000254496	9606	Homo sapiens	HMGA1		R-HSA-175174
R-HSA-8876493	InlA-mediated entry of Listeria monocytogenes into host cells	1	14	0.00100122	0.326777	0.582727	5	5	0.00042416	9606	Homo sapiens	CTNNB1		R-HSA-8876948;R-HSA-8876497;R-HSA-8876993;R-HSA-112333;R-HSA-8877003
R-HSA-5218900	CASP8 activity is inhibited	1	14	0.00100122	0.326777	0.582727	2	3	0.000254496	9606	Homo sapiens	FADD		R-HSA-3465429;R-HSA-5675456
R-HSA-5357786	TNFR1-induced proapoptotic signaling	1	14	0.00100122	0.326777	0.582727	2	3	0.000254496	9606	Homo sapiens	FADD		R-HSA-140978;R-HSA-75240
R-HSA-2025928	Calcineurin activates NFAT	1	14	0.00100122	0.326777	0.582727	1	2	0.000169664	9606	Homo sapiens	PPIF		R-HSA-2025882
R-HSA-71032	Propionyl-CoA catabolism	1	14	0.00100122	0.326777	0.582727	1	3	0.000254496	9606	Homo sapiens	MUT		R-HSA-71010
R-HSA-77108	Utilization of Ketone Bodies	1	14	0.00100122	0.326777	0.582727	1	3	0.000254496	9606	Homo sapiens	BDH1		R-HSA-73920
R-HSA-75205	Dissolution of Fibrin Clot	1	14	0.00100122	0.326777	0.582727	6	19	0.00161181	9606	Homo sapiens	PLAUR		R-HSA-158982;R-HSA-159001;R-HSA-158942;R-HSA-158959;R-HSA-159005;R-HSA-158925
R-HSA-70688	Proline catabolism	1	14	0.00100122	0.326777	0.582727	1	4	0.000339328	9606	Homo sapiens	ALDH4A1		R-HSA-70679
R-HSA-6807047	Cholesterol biosynthesis via desmosterol	1	14	0.00100122	0.326777	0.582727	1	4	0.000339328	9606	Homo sapiens	DHCR24		R-HSA-196417
R-HSA-6807062	Cholesterol biosynthesis via lathosterol	1	14	0.00100122	0.326777	0.582727	1	4	0.000339328	9606	Homo sapiens	DHCR24		R-HSA-6807064
R-HSA-163560	Triglyceride catabolism	2	42	0.00300365	0.332568	0.582727	2	17	0.00144214	9606	Homo sapiens	PPP1CC;CAV1		R-HSA-163568;R-HSA-163418
R-HSA-432720	Lysosome Vesicle Biogenesis	2	43	0.00307516	0.342794	0.582727	4	8	0.000678656	9606	Homo sapiens	VAMP8;CTSZ		R-HSA-432706;R-HSA-432707;R-HSA-432688;R-HSA-432712
R-HSA-5339716	Misspliced GSK3beta mutants stabilize beta-catenin	1	15	0.00107273	0.345547	0.582727	1	1	8.4832e-05	9606	Homo sapiens	CTNNB1		R-HSA-5339713
R-HSA-8983711	OAS antiviral response	1	15	0.00107273	0.345547	0.582727	1	15	0.00127248	9606	Homo sapiens	OASL		R-HSA-8985153
R-HSA-376176	Signaling by ROBO receptors	8	235	0.0168061	0.347123	0.582727	4	60	0.00508992	9606	Homo sapiens	RPS28;RPS27;RPL31;USP33;GPC1;RPL35A		R-HSA-428518;R-HSA-9014652;R-HSA-8986083;R-HSA-9014610
R-HSA-5218920	VEGFR2 mediated vascular permeability	2	44	0.00314668	0.35297	0.582727	4	15	0.00127248	9606	Homo sapiens	CAV1;CTNNB1		R-HSA-202129;R-HSA-202144;R-HSA-5357477;R-HSA-202110
R-HSA-9027276	Erythropoietin activates Phosphoinositide-3-kinase (PI3K)	1	16	0.00114425	0.363796	0.582727	7	7	0.000593824	9606	Homo sapiens	LYN		R-HSA-9027273;R-HSA-9027272;R-HSA-9021627;R-HSA-9027275;R-HSA-9027281;R-HSA-9012657;R-HSA-9027280
R-HSA-4839743	phosphorylation site mutants of CTNNB1 are not targeted to the proteasome by the destruction complex	1	16	0.00114425	0.363796	0.582727	4	4	0.000339328	9606	Homo sapiens	CTNNB1		R-HSA-4827388;R-HSA-4839635;R-HSA-4839634;R-HSA-4839638
R-HSA-5358747	S33 mutants of beta-catenin aren't phosphorylated	1	16	0.00114425	0.363796	0.582727	1	1	8.4832e-05	9606	Homo sapiens	CTNNB1		R-HSA-4839634
R-HSA-5358749	S37 mutants of beta-catenin aren't phosphorylated	1	16	0.00114425	0.363796	0.582727	1	1	8.4832e-05	9606	Homo sapiens	CTNNB1		R-HSA-4839635
R-HSA-5358751	S45 mutants of beta-catenin aren't phosphorylated	1	16	0.00114425	0.363796	0.582727	1	1	8.4832e-05	9606	Homo sapiens	CTNNB1		R-HSA-4827388
R-HSA-5358752	T41 mutants of beta-catenin aren't phosphorylated	1	16	0.00114425	0.363796	0.582727	1	1	8.4832e-05	9606	Homo sapiens	CTNNB1		R-HSA-4839638
R-HSA-380615	Serotonin clearance from the synaptic cleft	1	16	0.00114425	0.363796	0.582727	1	3	0.000254496	9606	Homo sapiens	ALDH2		R-HSA-380608
R-HSA-877312	Regulation of IFNG signaling	1	16	0.00114425	0.363796	0.582727	1	4	0.000339328	9606	Homo sapiens	PTPN2		R-HSA-997326
R-HSA-2691230	Signaling by NOTCH1 HD Domain Mutants in Cancer	1	16	0.00114425	0.363796	0.582727	1	6	0.000508992	9606	Homo sapiens	ADAM17		R-HSA-2730752
R-HSA-2691232	Constitutive Signaling by NOTCH1 HD Domain Mutants	1	16	0.00114425	0.363796	0.582727	1	6	0.000508992	9606	Homo sapiens	ADAM17		R-HSA-2730752
R-HSA-204005	COPII-mediated vesicle transport	3	77	0.00550669	0.370743	0.582727	12	16	0.00135731	9606	Homo sapiens	STX17;GOSR2;CTSZ		R-HSA-5694423;R-HSA-5694439;R-HSA-5694418;R-HSA-203973;R-HSA-5694417;R-HSA-5694446;R-HSA-5694527;R-HSA-204008;R-HSA-5694522;R-HSA-5694425;R-HSA-5694441;R-HSA-5694409
R-HSA-168249	Innate Immune System	39	1302	0.0931131	0.374799	0.582727	89	651	0.0552257	9606	Homo sapiens	ASAH1;CANT1;CD81;UNC93B1;SLC44A2;CTSZ;CTSL;FADD;CTSD;B2M;CTSB;LYN;YES1;DGAT1;FUCA2;HLA-B;PLAUR;HLA-C;NDUFC2;ISG15;HLA-A;BAIAP2;VAMP8;GALNS;MAVS;NPC2;DNAJC5;SPAG1;PPIF;CTNNB1;MYH9;RAF1;GLA;LGMN		R-HSA-936462;R-HSA-2424484;R-HSA-2424486;R-HSA-2029469;R-HSA-8853252;R-HSA-2424487;R-HSA-2029466;R-HSA-2424480;R-HSA-210309;R-HSA-2424482;R-HSA-2029465;R-HSA-9013889;R-HSA-2395439;R-HSA-3134883;R-HSA-2029459;R-HSA-9013895;R-HSA-1678998;R-HSA-6799350;R-HSA-933532;R-HSA-933530;R-HSA-936475;R-HSA-2396594;R-HSA-933528;R-HSA-3134904;R-HSA-933526;R-HSA-933527;R-HSA-3134901;R-HSA-2197690;R-HSA-933525;R-…
R-HSA-180292	GAB1 signalosome	1	17	0.00121576	0.381537	0.582727	9	11	0.000933152	9606	Homo sapiens	EGFR		R-HSA-177923;R-HSA-177939;R-HSA-177926;R-HSA-177927;R-HSA-177924;R-HSA-177941;R-HSA-177930;R-HSA-177944;R-HSA-177935
R-HSA-2559584	Formation of Senescence-Associated Heterochromatin Foci (SAHF)	1	17	0.00121576	0.381537	0.582727	1	2	0.000169664	9606	Homo sapiens	HMGA1		R-HSA-4647594
R-HSA-918233	TRAF3-dependent IRF activation pathway	1	17	0.00121576	0.381537	0.582727	4	9	0.000763488	9606	Homo sapiens	MAVS		R-HSA-918232;R-HSA-918229;R-HSA-918227;R-HSA-918225
R-HSA-8949664	Processing of SMDT1	1	17	0.00121576	0.381537	0.582727	1	5	0.00042416	9606	Homo sapiens	STOML2		R-HSA-8949668
R-HSA-196843	Vitamin B2 (riboflavin) metabolism	1	17	0.00121576	0.381537	0.582727	1	5	0.00042416	9606	Homo sapiens	RFT1		R-HSA-3165230
R-HSA-6804759	Regulation of TP53 Activity through Association with Co-factors	1	17	0.00121576	0.381537	0.582727	1	11	0.000933152	9606	Homo sapiens	BANP		R-HSA-3221982
R-HSA-379726	Mitochondrial tRNA aminoacylation	2	47	0.00336122	0.383147	0.582727	2	21	0.00178147	9606	Homo sapiens	MARS2;HARS2		R-HSA-380157;R-HSA-380234
R-HSA-3108214	SUMOylation of DNA damage response and repair proteins	3	79	0.00564972	0.385932	0.582727	7	24	0.00203597	9606	Homo sapiens	MDC1;CETN2;PML		R-HSA-3000383;R-HSA-5228508;R-HSA-3000411;R-HSA-4570463;R-HSA-3000433;R-HSA-4570553;R-HSA-4570554
R-HSA-199992	trans-Golgi Network Vesicle Budding	3	80	0.00572123	0.393495	0.582727	10	19	0.00161181	9606	Homo sapiens	VAMP8;CPD;CTSZ		R-HSA-421831;R-HSA-432706;R-HSA-432707;R-HSA-432688;R-HSA-376364;R-HSA-421836;R-HSA-434362;R-HSA-421835;R-HSA-432712;R-HSA-421833
R-HSA-421837	Clathrin derived vesicle budding	3	80	0.00572123	0.393495	0.582727	10	19	0.00161181	9606	Homo sapiens	VAMP8;CPD;CTSZ		R-HSA-421831;R-HSA-432706;R-HSA-432707;R-HSA-432688;R-HSA-376364;R-HSA-421836;R-HSA-434362;R-HSA-421835;R-HSA-432712;R-HSA-421833
R-HSA-9027284	Erythropoietin activates RAS	1	18	0.00128728	0.398785	0.582727	8	8	0.000678656	9606	Homo sapiens	LYN		R-HSA-9027274;R-HSA-9029149;R-HSA-9029151;R-HSA-9029150;R-HSA-9029155;R-HSA-9024723;R-HSA-9029158;R-HSA-9024726
R-HSA-8847993	ERBB2 Activates PTK6 Signaling	1	18	0.00128728	0.398785	0.582727	2	2	0.000169664	9606	Homo sapiens	EGFR		R-HSA-8848005;R-HSA-8847995
R-HSA-171007	p38MAPK events	1	18	0.00128728	0.398785	0.582727	2	5	0.00042416	9606	Homo sapiens	RALB		R-HSA-171026;R-HSA-170991
R-HSA-77348	Beta oxidation of octanoyl-CoA to hexanoyl-CoA	1	18	0.00128728	0.398785	0.582727	1	4	0.000339328	9606	Homo sapiens	ACADM		R-HSA-77338
R-HSA-2160916	Hyaluronan uptake and degradation	1	18	0.00128728	0.398785	0.582727	2	9	0.000763488	9606	Homo sapiens	SLC9A1		R-HSA-2160884;R-HSA-2160892
R-HSA-964739	N-glycan trimming and elongation in the cis-Golgi	1	18	0.00128728	0.398785	0.582727	1	5	0.00042416	9606	Homo sapiens	MGAT1		R-HSA-964768
R-HSA-205043	NRIF signals cell death from the nucleus	1	18	0.00128728	0.398785	0.582727	1	7	0.000593824	9606	Homo sapiens	APH1A		R-HSA-205112
R-HSA-1482883	Acyl chain remodeling of DAG and TAG	1	18	0.00128728	0.398785	0.582727	1	8	0.000678656	9606	Homo sapiens	DGAT1		R-HSA-1482889
R-HSA-109581	Apoptosis	6	180	0.0128728	0.399	0.582727	24	126	0.0106888	9606	Homo sapiens	TJP1;CTNNB1;FADD;BID;DYNLL2;TJP2		R-HSA-2562564;R-HSA-508162;R-HSA-141159;R-HSA-141156;R-HSA-139908;R-HSA-3465459;R-HSA-3371359;R-HSA-351913;R-HSA-139917;R-HSA-114352;R-HSA-139920;R-HSA-168848;R-HSA-139952;R-HSA-168849;R-HSA-3371360;R-HSA-141367;R-HSA-139895;R-HSA-139893;R-HSA-139898;R-HSA-73945;R-HSA-351871;R-HSA-202969;R-HSA-139897;R-HSA-3465448
R-HSA-70614	Amino acid synthesis and interconversion (transamination)	3	82	0.00586426	0.408547	0.582727	6	35	0.00296912	9606	Homo sapiens	OAT;GPT2		R-HSA-507749;R-HSA-507775;R-HSA-70523;R-HSA-70666;R-HSA-70524;R-HSA-70654
R-HSA-1433557	Signaling by SCF-KIT	2	50	0.00357577	0.412705	0.582727	19	36	0.00305395	9606	Homo sapiens	LYN;YES1		R-HSA-1433428;R-HSA-205319;R-HSA-1433488;R-HSA-1433456;R-HSA-1562641;R-HSA-1470012;R-HSA-1470010;R-HSA-1472121;R-HSA-1470009;R-HSA-205234;R-HSA-1433542;R-HSA-205238;R-HSA-205205;R-HSA-1433506;R-HSA-1433454;R-HSA-1433451;R-HSA-1433418;R-HSA-1433514;R-HSA-205244
R-HSA-75893	TNF signaling	2	50	0.00357577	0.412705	0.582727	3	29	0.00246013	9606	Homo sapiens	ADAM17;FADD		R-HSA-140978;R-HSA-75240;R-HSA-3371385
R-HSA-512988	Interleukin-3, Interleukin-5 and GM-CSF signaling	2	50	0.00357577	0.412705	0.582727	3	38	0.00322362	9606	Homo sapiens	LYN;YES1		R-HSA-879917;R-HSA-912629;R-HSA-912627
R-HSA-168898	Toll-like Receptor Cascades	6	183	0.0130873	0.413945	0.582727	9	180	0.0152698	9606	Homo sapiens	CTSL;UNC93B1;FADD;LGMN;CTSB		R-HSA-1678921;R-HSA-1678920;R-HSA-2562564;R-HSA-1678927;R-HSA-9013889;R-HSA-2562541;R-HSA-1678981;R-HSA-9013895;R-HSA-1678998
R-HSA-196299	Beta-catenin phosphorylation cascade	1	19	0.00135879	0.415552	0.582727	4	4	0.000339328	9606	Homo sapiens	CTNNB1		R-HSA-195283;R-HSA-195318;R-HSA-195287;R-HSA-195300
R-HSA-6785631	ERBB2 Regulates Cell Motility	1	19	0.00135879	0.415552	0.582727	2	2	0.000169664	9606	Homo sapiens	EGFR		R-HSA-6785636;R-HSA-6785648
R-HSA-111447	Activation of BAD and translocation to mitochondria	1	19	0.00135879	0.415552	0.582727	1	5	0.00042416	9606	Homo sapiens	BID		R-HSA-139897
R-HSA-196780	Biotin transport and metabolism	1	19	0.00135879	0.415552	0.582727	1	13	0.00110282	9606	Homo sapiens	SLC5A6		R-HSA-199219
R-HSA-1980143	Signaling by NOTCH1	3	83	0.00593578	0.416031	0.582727	6	37	0.00313879	9606	Homo sapiens	APH1A;ADAM17;NUMB		R-HSA-157632;R-HSA-1980109;R-HSA-157353;R-HSA-1980128;R-HSA-1980112;R-HSA-1912386
R-HSA-2408522	Selenoamino acid metabolism	6	184	0.0131588	0.418919	0.582727	2	33	0.00279946	9606	Homo sapiens	RPS28;RPS27;RPL31;RPL35A		R-HSA-2408529;R-HSA-5333615
R-HSA-3928662	EPHB-mediated forward signaling	2	51	0.00364729	0.422402	0.582727	5	26	0.00220563	9606	Homo sapiens	LYN;YES1		R-HSA-3928623;R-HSA-4093336;R-HSA-3928627;R-HSA-3928583;R-HSA-3928645
R-HSA-8852135	Protein ubiquitination	3	84	0.00600729	0.423485	0.582727	2	32	0.00271463	9606	Homo sapiens	HLA-B;HLA-A		R-HSA-8943080;R-HSA-8943083
R-HSA-556833	Metabolism of lipids	42	1433	0.102482	0.42446	0.582727	98	942	0.0799118	9606	Homo sapiens	ASAH1;AGPAT9;SLC44A1;SLC44A2;MSMO1;PKD2;HMGCL;PPP1CC;NSDHL;SPTLC2;NUDT19;ACADM;ACAD10;FDFT1;LYN;STARD3;DGAT1;ACSL1;ELOVL5;CAV1;MBOAT7;DHCR24;MUT;MCAT;ACSF2;PISD;SQLE;BDH1;ACOX1;SCD;EHHADH;LPCAT2;SLC27A3;GLA;LGMN		R-HSA-2426151;R-HSA-2426146;R-HSA-400143;R-HSA-1655826;R-HSA-6810474;R-HSA-1368065;R-HSA-444433;R-HSA-77338;R-HSA-109341;R-HSA-196126;R-HSA-77345;R-HSA-8933547;R-HSA-1482547;R-HSA-1655849;R-HSA-1655848;R-HSA-1482533;R-HSA-1655850;R-HSA-1655844;R-HSA-191299;R-HSA-196417;R-HSA-201035;R-HSA-194642;R-HSA-560473;R-HSA-5696004;R-HSA-194641;R-HSA-163418;R-HSA-428127;R-HSA-1989758;R-HSA-1989759;R-HSA-879…
R-HSA-170834	Signaling by TGF-beta Receptor Complex	3	85	0.00607881	0.430906	0.582727	8	82	0.00695623	9606	Homo sapiens	PPP1CC;CGN;F11R		R-HSA-178178;R-HSA-2160931;R-HSA-2160932;R-HSA-2134532;R-HSA-2160935;R-HSA-2134519;R-HSA-2134506;R-HSA-178189
R-HSA-140534	Caspase activation via Death Receptors in the presence of ligand	1	20	0.00143031	0.431854	0.582727	9	9	0.000763488	9606	Homo sapiens	FADD		R-HSA-139952;R-HSA-3371360;R-HSA-2562564;R-HSA-141159;R-HSA-141156;R-HSA-3465459;R-HSA-73945;R-HSA-3465448;R-HSA-3371359
R-HSA-1963640	GRB2 events in ERBB2 signaling	1	20	0.00143031	0.431854	0.582727	2	4	0.000339328	9606	Homo sapiens	EGFR		R-HSA-1250498;R-HSA-1250488
R-HSA-8849175	Threonine catabolism	1	20	0.00143031	0.431854	0.582727	1	4	0.000339328	9606	Homo sapiens	HRSP12		R-HSA-9014641
R-HSA-388844	Receptor-type tyrosine-protein phosphatases	1	20	0.00143031	0.431854	0.582727	1	6	0.000508992	9606	Homo sapiens	PPFIA1		R-HSA-388824
R-HSA-109606	Intrinsic Pathway for Apoptosis	2	52	0.0037188	0.432016	0.582727	12	47	0.00398711	9606	Homo sapiens	BID;DYNLL2		R-HSA-114352;R-HSA-139920;R-HSA-168848;R-HSA-168849;R-HSA-141367;R-HSA-508162;R-HSA-139895;R-HSA-139908;R-HSA-139893;R-HSA-139898;R-HSA-139897;R-HSA-139917
R-HSA-8864260	Transcriptional regulation by the AP-2 (TFAP2) family of transcription factors	2	52	0.0037188	0.432016	0.582727	2	44	0.00373261	9606	Homo sapiens	EGFR		R-HSA-8874789;R-HSA-8874797
R-HSA-1483206	Glycerophospholipid biosynthesis	7	222	0.0158764	0.437514	0.582727	8	133	0.0112827	9606	Homo sapiens	DGAT1;SLC44A1;AGPAT9;SLC44A2;MBOAT7;LPCAT2;PISD		R-HSA-1482598;R-HSA-1482533;R-HSA-1482626;R-HSA-1482547;R-HSA-444433;R-HSA-1483212;R-HSA-75885;R-HSA-1482889
R-HSA-5357801	Programmed Cell Death	6	188	0.0134449	0.438758	0.582727	27	139	0.0117917	9606	Homo sapiens	TJP1;CTNNB1;FADD;BID;DYNLL2;TJP2		R-HSA-508162;R-HSA-139908;R-HSA-3465459;R-HSA-139917;R-HSA-139920;R-HSA-168848;R-HSA-168849;R-HSA-3371360;R-HSA-5675456;R-HSA-73945;R-HSA-5213462;R-HSA-202969;R-HSA-3465448;R-HSA-3465429;R-HSA-2562564;R-HSA-141159;R-HSA-141156;R-HSA-3371359;R-HSA-351913;R-HSA-114352;R-HSA-139952;R-HSA-141367;R-HSA-139895;R-HSA-139893;R-HSA-139898;R-HSA-351871;R-HSA-139897
R-HSA-177929	Signaling by EGFR	2	53	0.00379032	0.441545	0.582727	42	48	0.00407194	9606	Homo sapiens	ADAM17;EGFR		R-HSA-177922;R-HSA-177923;R-HSA-177926;R-HSA-177927;R-HSA-177924;R-HSA-177925;R-HSA-177930;R-HSA-182986;R-HSA-183051;R-HSA-8951490;R-HSA-177934;R-HSA-182990;R-HSA-177935;R-HSA-183055;R-HSA-177933;R-HSA-177938;R-HSA-183058;R-HSA-182994;R-HSA-177939;R-HSA-177936;R-HSA-177937;R-HSA-182993;R-HSA-177942;R-HSA-177943;R-HSA-177941;R-HSA-183002;R-HSA-177946;R-HSA-183067;R-HSA-8864029;R-HSA-177944;R-HSA-1…
R-HSA-6791226	Major pathway of rRNA processing in the nucleolus and cytosol	6	189	0.0135164	0.443699	0.582727	3	7	0.000593824	9606	Homo sapiens	RPS28;RPS27;RPL31;RPL35A		R-HSA-6791223;R-HSA-6791221;R-HSA-6791218
R-HSA-4420332	Defective B3GALT6 causes EDSP2 and SEMDJL1	1	21	0.00150182	0.447701	0.582727	1	1	8.4832e-05	9606	Homo sapiens	GPC1		R-HSA-4420365
R-HSA-3560801	Defective B3GAT3 causes JDSSDHD	1	21	0.00150182	0.447701	0.582727	1	1	8.4832e-05	9606	Homo sapiens	GPC1		R-HSA-3560802
R-HSA-3560783	Defective B4GALT7 causes EDS, progeroid type	1	21	0.00150182	0.447701	0.582727	1	1	8.4832e-05	9606	Homo sapiens	GPC1		R-HSA-3560804
R-HSA-5675482	Regulation of necroptotic cell death	1	21	0.00150182	0.447701	0.582727	2	5	0.00042416	9606	Homo sapiens	FADD		R-HSA-3465429;R-HSA-5675456
R-HSA-77346	Beta oxidation of decanoyl-CoA to octanoyl-CoA-CoA	1	21	0.00150182	0.447701	0.582727	1	5	0.00042416	9606	Homo sapiens	ACADM		R-HSA-77345
R-HSA-77288	mitochondrial fatty acid beta-oxidation of unsaturated fatty acids	1	21	0.00150182	0.447701	0.582727	1	6	0.000508992	9606	Homo sapiens	ACADM		R-HSA-109341
R-HSA-6798163	Choline catabolism	1	21	0.00150182	0.447701	0.582727	1	8	0.000678656	9606	Homo sapiens	SLC44A1		R-HSA-6797956
R-HSA-196791	Vitamin D (calciferol) metabolism	1	21	0.00150182	0.447701	0.582727	1	19	0.00161181	9606	Homo sapiens	LGMN		R-HSA-350158
R-HSA-3560782	Diseases associated with glycosaminoglycan metabolism	2	54	0.00386183	0.450985	0.582727	11	29	0.00246013	9606	Homo sapiens	EXT2;GPC1		R-HSA-9036283;R-HSA-3656261;R-HSA-3560804;R-HSA-9036285;R-HSA-3560802;R-HSA-3656257;R-HSA-9036289;R-HSA-3656254;R-HSA-9036290;R-HSA-3656267;R-HSA-4420365
R-HSA-1614558	Degradation of cysteine and homocysteine	2	54	0.00386183	0.450985	0.582727	3	23	0.00195114	9606	Homo sapiens	ETHE1;SQRDL		R-HSA-1614665;R-HSA-1614618;R-HSA-1614605
R-HSA-1638091	Heparan sulfate/heparin (HS-GAG) metabolism	3	88	0.00629336	0.452953	0.582727	20	32	0.00271463	9606	Homo sapiens	EXT2;GPC1;HS2ST1		R-HSA-2076383;R-HSA-1889981;R-HSA-2076508;R-HSA-1667005;R-HSA-1889978;R-HSA-2024084;R-HSA-2076371;R-HSA-1878002;R-HSA-2024108;R-HSA-2022860;R-HSA-2022856;R-HSA-2076392;R-HSA-2022919;R-HSA-2022887;R-HSA-2024100;R-HSA-2076419;R-HSA-2076611;R-HSA-2022851;R-HSA-1889955;R-HSA-1678694
R-HSA-977225	Amyloid fiber formation	3	88	0.00629336	0.452953	0.582727	4	33	0.00279946	9606	Homo sapiens	APH1A;B2M;GLA		R-HSA-976734;R-HSA-9010096;R-HSA-977136;R-HSA-5693001
R-HSA-1483191	Synthesis of PC	2	55	0.00393335	0.460333	0.582727	1	18	0.00152698	9606	Homo sapiens	SLC44A1;SLC44A2		R-HSA-444433
R-HSA-73780	RNA Polymerase III Chain Elongation	1	22	0.00157334	0.463108	0.582727	3	3	0.000254496	9606	Homo sapiens	SPAG1		R-HSA-113446;R-HSA-113705;R-HSA-113451
R-HSA-5205685	Pink/Parkin Mediated Mitophagy	1	22	0.00157334	0.463108	0.582727	4	8	0.000678656	9606	Homo sapiens	MTERF3		R-HSA-5205663;R-HSA-5205673;R-HSA-5205682;R-HSA-5205649
R-HSA-1963642	PI3K events in ERBB2 signaling	1	22	0.00157334	0.463108	0.582727	3	7	0.000593824	9606	Homo sapiens	EGFR		R-HSA-1306963;R-HSA-1306965;R-HSA-1306957
R-HSA-139853	Elevation of cytosolic Ca2+ levels	1	22	0.00157334	0.463108	0.582727	2	5	0.00042416	9606	Homo sapiens	STIM1		R-HSA-434798;R-HSA-434700
R-HSA-2022857	Keratan sulfate degradation	1	22	0.00157334	0.463108	0.582727	1	6	0.000508992	9606	Homo sapiens	GALNS		R-HSA-1630304
R-HSA-390918	Peroxisomal lipid metabolism	3	90	0.00643639	0.467454	0.582727	4	35	0.00296912	9606	Homo sapiens	ACOX1;EHHADH;NUDT19		R-HSA-390256;R-HSA-6809264;R-HSA-6809263;R-HSA-6810474
R-HSA-5620924	Intraflagellar transport	2	56	0.00400486	0.469589	0.582727	7	12	0.00101798	9606	Homo sapiens	TRIP11;DYNLL2		R-HSA-5624949;R-HSA-5617828;R-HSA-5625424;R-HSA-5625426;R-HSA-5625421;R-HSA-5624952;R-HSA-5625416
R-HSA-157858	Gap junction trafficking and regulation	2	56	0.00400486	0.469589	0.582727	5	24	0.00203597	9606	Homo sapiens	TJP1;MYO6		R-HSA-191654;R-HSA-190519;R-HSA-191636;R-HSA-190829;R-HSA-190541
R-HSA-4420097	VEGFA-VEGFR2 Pathway	4	125	0.00893943	0.470569	0.582727	9	77	0.00653207	9606	Homo sapiens	AXL;CAV1;CTNNB1;BAIAP2		R-HSA-202129;R-HSA-202144;R-HSA-5357477;R-HSA-5357429;R-HSA-5357479;R-HSA-2029465;R-HSA-5357432;R-HSA-5218819;R-HSA-202110
R-HSA-73980	RNA Polymerase III Transcription Termination	1	23	0.00164485	0.478086	0.582727	2	2	0.000169664	9606	Homo sapiens	SPAG1		R-HSA-113449;R-HSA-113454
R-HSA-181429	Serotonin Neurotransmitter Release Cycle	1	23	0.00164485	0.478086	0.582727	2	4	0.000339328	9606	Homo sapiens	PPFIA1		R-HSA-380901;R-HSA-380905
R-HSA-881907	Gastrin-CREB signalling pathway via PKC and MAPK	1	23	0.00164485	0.478086	0.582727	3	9	0.000763488	9606	Homo sapiens	EGFR		R-HSA-2179415;R-HSA-2179387;R-HSA-2179407
R-HSA-2979096	NOTCH2 Activation and Transmission of Signal to the Nucleus	1	23	0.00164485	0.478086	0.582727	2	11	0.000933152	9606	Homo sapiens	APH1A		R-HSA-2974731;R-HSA-157640
R-HSA-2142845	Hyaluronan metabolism	1	23	0.00164485	0.478086	0.582727	2	12	0.00101798	9606	Homo sapiens	SLC9A1		R-HSA-2160884;R-HSA-2160892
R-HSA-3928664	Ephrin signaling	1	23	0.00164485	0.478086	0.582727	1	11	0.000933152	9606	Homo sapiens	MYL12A		R-HSA-3928640
R-HSA-156711	Polo-like kinase mediated events	1	23	0.00164485	0.478086	0.582727	1	15	0.00127248	9606	Homo sapiens	PKMYT1		R-HSA-162657
R-HSA-8851708	Signaling by FGFR2 IIIa TM	1	24	0.00171637	0.492647	0.582727	1	2	0.000169664	9606	Homo sapiens	SPAG1		R-HSA-8851710
R-HSA-446199	Synthesis of Dolichyl-phosphate	1	24	0.00171637	0.492647	0.582727	1	6	0.000508992	9606	Homo sapiens	NUS1		R-HSA-4419978
R-HSA-392517	Rap1 signalling	1	24	0.00171637	0.492647	0.582727	1	7	0.000593824	9606	Homo sapiens	RAF1		R-HSA-392835
R-HSA-199977	ER to Golgi Anterograde Transport	5	164	0.0117285	0.493594	0.582727	20	39	0.00330845	9606	Homo sapiens	STX17;GOSR2;CTSZ;DYNLL2;BET1L		R-HSA-5694423;R-HSA-5694418;R-HSA-203973;R-HSA-5694417;R-HSA-5694527;R-HSA-6809006;R-HSA-5694428;R-HSA-204008;R-HSA-5694522;R-HSA-6809003;R-HSA-5694425;R-HSA-6809015;R-HSA-6809014;R-HSA-5694439;R-HSA-6809011;R-HSA-6809010;R-HSA-5694446;R-HSA-5694413;R-HSA-5694441;R-HSA-5694409
R-HSA-5419276	Mitochondrial translation termination	3	94	0.00672245	0.495927	0.582727	5	5	0.00042416	9606	Homo sapiens	MRPL30;MRPL1;MRPS14		R-HSA-5419264;R-HSA-5419281;R-HSA-5419271;R-HSA-5419273;R-HSA-5419277
R-HSA-141444	Amplification of signal from unattached kinetochores via a MAD2 inhibitory signal	3	94	0.00672245	0.495927	0.582727	4	4	0.000339328	9606	Homo sapiens	PPP1CC;RPS27;DYNLL2		R-HSA-141409;R-HSA-141431;R-HSA-141422;R-HSA-141439
R-HSA-141424	Amplification of signal from the kinetochores	3	94	0.00672245	0.495927	0.582727	4	4	0.000339328	9606	Homo sapiens	PPP1CC;RPS27;DYNLL2		R-HSA-141409;R-HSA-141431;R-HSA-141422;R-HSA-141439
R-HSA-5389840	Mitochondrial translation elongation	3	94	0.00672245	0.495927	0.582727	5	8	0.000678656	9606	Homo sapiens	MRPL30;MRPL1;MRPS14		R-HSA-5389842;R-HSA-5389857;R-HSA-5389848;R-HSA-5419279;R-HSA-5419261
R-HSA-9006934	Signaling by Receptor Tyrosine Kinases	15	518	0.037045	0.497566	0.582727	106	631	0.053529	9606	Homo sapiens	LYN;YES1;RALB;ITGA3;CAV1;ITGA2;DOCK7;BAIAP2;EGFR;APH1A;ADAM17;AXL;SPAG1;CTNNB1;PTPN2		R-HSA-177922;R-HSA-177923;R-HSA-8848005;R-HSA-6785636;R-HSA-177926;R-HSA-205319;R-HSA-177927;R-HSA-177924;R-HSA-1562641;R-HSA-177925;R-HSA-177930;R-HSA-183051;R-HSA-177934;R-HSA-177935;R-HSA-183055;R-HSA-177933;R-HSA-177938;R-HSA-183058;R-HSA-171026;R-HSA-177939;R-HSA-177936;R-HSA-177937;R-HSA-177942;R-HSA-177943;R-HSA-177941;R-HSA-6785648;R-HSA-177946;R-HSA-183067;R-HSA-6803838;R-HSA-177944;R-HS…
R-HSA-425393	Transport of inorganic cations/anions and amino acids/oligopeptides	5	165	0.0118	0.498891	0.582727	4	75	0.0063624	9606	Homo sapiens	SLC6A6;SLC20A2;SLC20A1;SLC25A22;SLC9A1		R-HSA-8875623;R-HSA-427605;R-HSA-351987;R-HSA-425994
R-HSA-5620916	VxPx cargo-targeting to cilium	1	25	0.00178789	0.506803	0.582727	9	10	0.00084832	9606	Homo sapiens	PKD2		R-HSA-5623525;R-HSA-5623524;R-HSA-5623527;R-HSA-5620918;R-HSA-5623521;R-HSA-5620914;R-HSA-5623519;R-HSA-5623513;R-HSA-5620921
R-HSA-1839117	Signaling by cytosolic FGFR1 fusion mutants	1	25	0.00178789	0.506803	0.582727	7	14	0.00118765	9606	Homo sapiens	MYO18A		R-HSA-1839039;R-HSA-1839112;R-HSA-1839080;R-HSA-1839065;R-HSA-1839078;R-HSA-1839031;R-HSA-1839091
R-HSA-1482922	Acyl chain remodelling of PI	1	25	0.00178789	0.506803	0.582727	2	6	0.000508992	9606	Homo sapiens	MBOAT7		R-HSA-1482598;R-HSA-1482626
R-HSA-1368082	RORA activates gene expression	1	25	0.00178789	0.506803	0.582727	1	4	0.000339328	9606	Homo sapiens	LYN		R-HSA-1801587
R-HSA-167044	Signalling to RAS	1	25	0.00178789	0.506803	0.582727	2	10	0.00084832	9606	Homo sapiens	RALB		R-HSA-171026;R-HSA-170991
R-HSA-428643	Organic anion transporters	1	25	0.00178789	0.506803	0.582727	1	9	0.000763488	9606	Homo sapiens	SLC25A22		R-HSA-8875623
R-HSA-196108	Pregnenolone biosynthesis	1	25	0.00178789	0.506803	0.582727	1	9	0.000763488	9606	Homo sapiens	STARD3		R-HSA-196126
R-HSA-6807004	Negative regulation of MET activity	1	25	0.00178789	0.506803	0.582727	1	10	0.00084832	9606	Homo sapiens	PTPN2		R-HSA-6807027
R-HSA-5368286	Mitochondrial translation initiation	3	96	0.00686548	0.509876	0.582727	3	4	0.000339328	9606	Homo sapiens	MRPL30;MRPL1;MRPS14		R-HSA-5368279;R-HSA-5389849;R-HSA-5389839
R-HSA-168928	DDX58/IFIH1-mediated induction of interferon-alpha/beta	3	96	0.00686548	0.509876	0.582727	26	46	0.00390227	9606	Homo sapiens	MAVS;ISG15;FADD		R-HSA-936462;R-HSA-168909;R-HSA-990528;R-HSA-933532;R-HSA-933530;R-HSA-936475;R-HSA-918232;R-HSA-933528;R-HSA-933526;R-HSA-918230;R-HSA-933527;R-HSA-918229;R-HSA-933525;R-HSA-933523;R-HSA-918227;R-HSA-918225;R-HSA-168934;R-HSA-168935;R-HSA-933538;R-HSA-933539;R-HSA-933537;R-HSA-990526;R-HSA-936381;R-HSA-936378;R-HSA-936564;R-HSA-936563
R-HSA-432722	Golgi Associated Vesicle Biogenesis	2	61	0.00436244	0.5144	0.582727	5	7	0.000593824	9606	Homo sapiens	VAMP8;CPD		R-HSA-421831;R-HSA-421836;R-HSA-434362;R-HSA-421835;R-HSA-421833
R-HSA-5173105	O-linked glycosylation	4	133	0.00951155	0.518438	0.582727	2	26	0.00220563	9606	Homo sapiens	GALNT7;GALNT6;C1GALT1;GALNT10		R-HSA-1964505;R-HSA-913675
R-HSA-5637810	Constitutive Signaling by EGFRvIII	1	26	0.0018594	0.520565	0.582727	17	18	0.00152698	9606	Homo sapiens	EGFR		R-HSA-5637808;R-HSA-1247999;R-HSA-5638137;R-HSA-5637798;R-HSA-5637766;R-HSA-1248002;R-HSA-5637764;R-HSA-5637796;R-HSA-5637765;R-HSA-5637794;R-HSA-5637795;R-HSA-5637792;R-HSA-5637806;R-HSA-1248655;R-HSA-5637770;R-HSA-5637800;R-HSA-5637801
R-HSA-5637812	Signaling by EGFRvIII in Cancer	1	26	0.0018594	0.520565	0.582727	17	18	0.00152698	9606	Homo sapiens	EGFR		R-HSA-5637808;R-HSA-1247999;R-HSA-5638137;R-HSA-5637798;R-HSA-5637766;R-HSA-1248002;R-HSA-5637764;R-HSA-5637796;R-HSA-5637765;R-HSA-5637794;R-HSA-5637795;R-HSA-5637792;R-HSA-5637806;R-HSA-1248655;R-HSA-5637770;R-HSA-5637800;R-HSA-5637801
R-HSA-8876384	Listeria monocytogenes entry into host cells	1	26	0.0018594	0.520565	0.582727	5	13	0.00110282	9606	Homo sapiens	CTNNB1		R-HSA-8876948;R-HSA-8876497;R-HSA-8876993;R-HSA-112333;R-HSA-8877003
R-HSA-264642	Acetylcholine Neurotransmitter Release Cycle	1	26	0.0018594	0.520565	0.582727	2	6	0.000508992	9606	Homo sapiens	PPFIA1		R-HSA-372529;R-HSA-372505
R-HSA-194138	Signaling by VEGF	4	134	0.00958307	0.524281	0.582727	9	83	0.00704106	9606	Homo sapiens	AXL;CAV1;CTNNB1;BAIAP2		R-HSA-202129;R-HSA-202144;R-HSA-5357477;R-HSA-5357429;R-HSA-5357479;R-HSA-2029465;R-HSA-5357432;R-HSA-5218819;R-HSA-202110
R-HSA-8868773	rRNA processing in the nucleus and cytosol	6	207	0.0148037	0.530558	0.582727	3	15	0.00127248	9606	Homo sapiens	RPS28;RPS27;RPL31;RPL35A		R-HSA-6791223;R-HSA-6791221;R-HSA-6791218
R-HSA-9012852	Signaling by NOTCH3	2	63	0.00450547	0.531613	0.582727	4	37	0.00313879	9606	Homo sapiens	APH1A;EGFR		R-HSA-9017817;R-HSA-9018573;R-HSA-9018572;R-HSA-9013361
R-HSA-167242	Abortive elongation of HIV-1 transcript in the absence of Tat	1	27	0.00193092	0.533944	0.582727	2	2	0.000169664	9606	Homo sapiens	SPAG1		R-HSA-167147;R-HSA-167087
R-HSA-76066	RNA Polymerase III Transcription Initiation From Type 2 Promoter	1	27	0.00193092	0.533944	0.582727	2	4	0.000339328	9606	Homo sapiens	SPAG1		R-HSA-112150;R-HSA-83805
R-HSA-8949215	Mitochondrial calcium ion transport	1	27	0.00193092	0.533944	0.582727	1	10	0.00084832	9606	Homo sapiens	STOML2		R-HSA-8949668
R-HSA-175474	Assembly Of The HIV Virion	1	27	0.00193092	0.533944	0.582727	1	16	0.00135731	9606	Homo sapiens	PPIF		R-HSA-3149454
R-HSA-72312	rRNA processing	7	245	0.0175213	0.539665	0.582727	4	21	0.00178147	9606	Homo sapiens	RPS28;RPS27;RPL31;MT-CO1;RPL35A		R-HSA-6791223;R-HSA-6791221;R-HSA-6791218;R-HSA-6785722
R-HSA-5578775	Ion homeostasis	2	64	0.00457699	0.540062	0.582727	3	15	0.00127248	9606	Homo sapiens	STIM1;ATP1B3		R-HSA-2089943;R-HSA-434798;R-HSA-936897
R-HSA-6788656	Histidine, lysine, phenylalanine, tyrosine, proline and tryptophan catabolism	4	137	0.00979761	0.541604	0.582727	4	53	0.0044961	9606	Homo sapiens	ALDH4A1;GSTZ1;CCBL2;DLST		R-HSA-901097;R-HSA-71173;R-HSA-70679;R-HSA-71037
R-HSA-6803529	FGFR2 alternative splicing	1	28	0.00200243	0.54695	0.582727	4	4	0.000339328	9606	Homo sapiens	SPAG1		R-HSA-6803527;R-HSA-6803523;R-HSA-6803838;R-HSA-6803836
R-HSA-76071	RNA Polymerase III Transcription Initiation From Type 3 Promoter	1	28	0.00200243	0.54695	0.582727	2	4	0.000339328	9606	Homo sapiens	SPAG1		R-HSA-112152;R-HSA-83803
R-HSA-76061	RNA Polymerase III Transcription Initiation From Type 1 Promoter	1	28	0.00200243	0.54695	0.582727	2	5	0.00042416	9606	Homo sapiens	SPAG1		R-HSA-76056;R-HSA-76060
R-HSA-212676	Dopamine Neurotransmitter Release Cycle	1	28	0.00200243	0.54695	0.582727	2	5	0.00042416	9606	Homo sapiens	PPFIA1		R-HSA-380869;R-HSA-380574
R-HSA-5218859	Regulated Necrosis	1	28	0.00200243	0.54695	0.582727	3	13	0.00110282	9606	Homo sapiens	FADD		R-HSA-3465429;R-HSA-5675456;R-HSA-5213462
R-HSA-5213460	RIPK1-mediated regulated necrosis	1	28	0.00200243	0.54695	0.582727	3	13	0.00110282	9606	Homo sapiens	FADD		R-HSA-3465429;R-HSA-5675456;R-HSA-5213462
R-HSA-71384	Ethanol oxidation	1	28	0.00200243	0.54695	0.582727	1	8	0.000678656	9606	Homo sapiens	ALDH2		R-HSA-71723
R-HSA-8964038	LDL clearance	1	28	0.00200243	0.54695	0.582727	2	19	0.00161181	9606	Homo sapiens	NPC2		R-HSA-8876484;R-HSA-8876472
R-HSA-3238698	WNT ligand biogenesis and trafficking	1	28	0.00200243	0.54695	0.582727	1	12	0.00101798	9606	Homo sapiens	TMED5		R-HSA-3247837
R-HSA-2173788	Downregulation of TGF-beta receptor signaling	1	28	0.00200243	0.54695	0.582727	2	28	0.0023753	9606	Homo sapiens	PPP1CC		R-HSA-178178;R-HSA-178189
R-HSA-5368287	Mitochondrial translation	3	102	0.00729457	0.550462	0.582727	13	17	0.00144214	9606	Homo sapiens	MRPL30;MRPL1;MRPS14		R-HSA-5389842;R-HSA-5419281;R-HSA-5368279;R-HSA-5389848;R-HSA-5389849;R-HSA-5419261;R-HSA-5419264;R-HSA-5389857;R-HSA-5419271;R-HSA-5419273;R-HSA-5419279;R-HSA-5389839;R-HSA-5419277
R-HSA-8978868	Fatty acid metabolism	12	429	0.0306801	0.55388	0.582727	22	217	0.0184086	9606	Homo sapiens	ELOVL5;SCD;ACSL1;ACOX1;EHHADH;NUDT19;ACADM;SLC27A3;MUT;MCAT;ACAD10;ACSF2		R-HSA-77345;R-HSA-8875077;R-HSA-71010;R-HSA-8933547;R-HSA-201035;R-HSA-6809263;R-HSA-548800;R-HSA-2046100;R-HSA-2046098;R-HSA-6810474;R-HSA-2046094;R-HSA-5696004;R-HSA-5690565;R-HSA-390256;R-HSA-6809264;R-HSA-2046088;R-HSA-2046085;R-HSA-5695980;R-HSA-77338;R-HSA-109341;R-HSA-2066787;R-HSA-2046083
R-HSA-77075	RNA Pol II CTD phosphorylation and interaction with CE	1	29	0.00207395	0.559595	0.582727	5	5	0.00042416	9606	Homo sapiens	SPAG1		R-HSA-77073;R-HSA-113430;R-HSA-77069;R-HSA-77068;R-HSA-77071
R-HSA-167160	RNA Pol II CTD phosphorylation and interaction with CE during HIV infection	1	29	0.00207395	0.559595	0.582727	5	5	0.00042416	9606	Homo sapiens	SPAG1		R-HSA-167153;R-HSA-167111;R-HSA-167098;R-HSA-167128;R-HSA-167133
R-HSA-933542	TRAF6 mediated NF-kB activation	1	29	0.00207395	0.559595	0.582727	2	4	0.000339328	9606	Homo sapiens	MAVS		R-HSA-933530;R-HSA-933528
R-HSA-1227986	Signaling by ERBB2	2	67	0.00479153	0.564772	0.582727	23	43	0.00364778	9606	Homo sapiens	YES1;EGFR		R-HSA-1963581;R-HSA-1306963;R-HSA-1250195;R-HSA-1251922;R-HSA-8848005;R-HSA-1963582;R-HSA-6785636;R-HSA-1250486;R-HSA-1306965;R-HSA-1963578;R-HSA-1250488;R-HSA-1250463;R-HSA-8864105;R-HSA-1250498;R-HSA-1963563;R-HSA-6785648;R-HSA-1963589;R-HSA-8864125;R-HSA-8863804;R-HSA-1251944;R-HSA-8847995;R-HSA-1306957;R-HSA-1963586
R-HSA-73772	RNA Polymerase I Promoter Escape	1	30	0.00214546	0.571887	0.582727	1	1	8.4832e-05	9606	Homo sapiens	SPAG1		R-HSA-73769
R-HSA-5673000	RAF activation	1	30	0.00214546	0.571887	0.582727	6	10	0.00084832	9606	Homo sapiens	RAF1		R-HSA-5672966;R-HSA-5672950;R-HSA-5672951;R-HSA-5672960;R-HSA-5672961;R-HSA-5672969
R-HSA-181430	Norepinephrine Neurotransmitter Release Cycle	1	30	0.00214546	0.571887	0.582727	2	6	0.000508992	9606	Homo sapiens	PPFIA1		R-HSA-374899;R-HSA-374922
R-HSA-8963889	Assembly of active LPL and LIPC lipase complexes	1	30	0.00214546	0.571887	0.582727	2	12	0.00101798	9606	Homo sapiens	LMF2		R-HSA-6785181;R-HSA-6785178
R-HSA-2644603	Signaling by NOTCH1 in Cancer	2	68	0.00486305	0.572794	0.582727	5	39	0.00330845	9606	Homo sapiens	APH1A;ADAM17		R-HSA-2220976;R-HSA-2220944;R-HSA-2730752;R-HSA-2220988;R-HSA-2666278
R-HSA-2894858	Signaling by NOTCH1 HD+PEST Domain Mutants in Cancer	2	68	0.00486305	0.572794	0.582727	2	21	0.00178147	9606	Homo sapiens	APH1A;ADAM17		R-HSA-2220976;R-HSA-2220988
R-HSA-2894862	Constitutive Signaling by NOTCH1 HD+PEST Domain Mutants	2	68	0.00486305	0.572794	0.582727	2	21	0.00178147	9606	Homo sapiens	APH1A;ADAM17		R-HSA-2220976;R-HSA-2220988
R-HSA-2644602	Signaling by NOTCH1 PEST Domain Mutants in Cancer	2	68	0.00486305	0.572794	0.582727	2	21	0.00178147	9606	Homo sapiens	APH1A;ADAM17		R-HSA-2220944;R-HSA-2220988
R-HSA-2644606	Constitutive Signaling by NOTCH1 PEST Domain Mutants	2	68	0.00486305	0.572794	0.582727	2	21	0.00178147	9606	Homo sapiens	APH1A;ADAM17		R-HSA-2220944;R-HSA-2220988
R-HSA-379724	tRNA Aminoacylation	2	68	0.00486305	0.572794	0.582727	2	42	0.00356295	9606	Homo sapiens	MARS2;HARS2		R-HSA-380157;R-HSA-380234
R-HSA-6807878	COPI-mediated anterograde transport	3	107	0.00765215	0.582727	0.582727	6	12	0.00101798	9606	Homo sapiens	GOSR2;DYNLL2;BET1L		R-HSA-6809015;R-HSA-6809014;R-HSA-6809011;R-HSA-6809010;R-HSA-6809006;R-HSA-6809003
R-HSA-1971475	A tetrasaccharide linker sequence is required for GAG synthesis	1	31	0.00221698	0.583837	0.583837	4	4	0.000339328	9606	Homo sapiens	GPC1		R-HSA-1889981;R-HSA-1889978;R-HSA-1878002;R-HSA-1889955
R-HSA-182971	EGFR downregulation	1	31	0.00221698	0.583837	0.583837	19	22	0.0018663	9606	Homo sapiens	EGFR		R-HSA-8867047;R-HSA-183072;R-HSA-8867044;R-HSA-8867041;R-HSA-182986;R-HSA-183051;R-HSA-8951490;R-HSA-182990;R-HSA-183055;R-HSA-183084;R-HSA-183058;R-HSA-182994;R-HSA-183089;R-HSA-182993;R-HSA-183002;R-HSA-183067;R-HSA-8864029;R-HSA-182969;R-HSA-183036
R-HSA-8949613	Cristae formation	1	31	0.00221698	0.583837	0.583837	1	2	0.000169664	9606	Homo sapiens	CHCHD6		R-HSA-8949609
R-HSA-5205647	Mitophagy	1	31	0.00221698	0.583837	0.583837	4	15	0.00127248	9606	Homo sapiens	MTERF3		R-HSA-5205663;R-HSA-5205673;R-HSA-5205682;R-HSA-5205649
R-HSA-3296469	Defects in cobalamin (B12) metabolism	1	31	0.00221698	0.583837	0.583837	2	16	0.00135731	9606	Homo sapiens	MUT		R-HSA-3322135;R-HSA-3322971
R-HSA-203927	MicroRNA (miRNA) biogenesis	1	31	0.00221698	0.583837	0.583837	1	8	0.000678656	9606	Homo sapiens	SPAG1		R-HSA-203901
R-HSA-1630316	Glycosaminoglycan metabolism	5	182	0.0130158	0.585205	0.585205	23	82	0.00695623	9606	Homo sapiens	GALNS;EXT2;GPC1;SLC9A1;HS2ST1		R-HSA-2076383;R-HSA-1889981;R-HSA-2076508;R-HSA-1667005;R-HSA-1889978;R-HSA-2024084;R-HSA-2076371;R-HSA-1878002;R-HSA-2024108;R-HSA-2022860;R-HSA-2160884;R-HSA-2022856;R-HSA-2076392;R-HSA-1630304;R-HSA-2022919;R-HSA-2022887;R-HSA-2024100;R-HSA-2160892;R-HSA-2076419;R-HSA-2076611;R-HSA-2022851;R-HSA-1889955;R-HSA-1678694
R-HSA-948021	Transport to the Golgi and subsequent modification	6	219	0.0156619	0.58524	0.58524	21	60	0.00508992	9606	Homo sapiens	STX17;GOSR2;CTSZ;MGAT1;DYNLL2;BET1L		R-HSA-5694423;R-HSA-5694418;R-HSA-203973;R-HSA-5694417;R-HSA-5694527;R-HSA-6809006;R-HSA-5694428;R-HSA-204008;R-HSA-5694522;R-HSA-6809003;R-HSA-964768;R-HSA-5694425;R-HSA-6809015;R-HSA-6809014;R-HSA-5694439;R-HSA-6809011;R-HSA-6809010;R-HSA-5694446;R-HSA-5694413;R-HSA-5694441;R-HSA-5694409
R-HSA-373755	Semaphorin interactions	2	70	0.00500608	0.588514	0.588514	1	40	0.00339328	9606	Homo sapiens	MYL6;MYH9		R-HSA-419197
R-HSA-5357769	Caspase activation via extrinsic apoptotic signalling pathway	1	32	0.00228849	0.595454	0.595454	9	17	0.00144214	9606	Homo sapiens	FADD		R-HSA-139952;R-HSA-3371360;R-HSA-2562564;R-HSA-141159;R-HSA-141156;R-HSA-3465459;R-HSA-73945;R-HSA-3465448;R-HSA-3371359
R-HSA-210500	Glutamate Neurotransmitter Release Cycle	1	32	0.00228849	0.595454	0.595454	2	8	0.000678656	9606	Homo sapiens	PPFIA1		R-HSA-210426;R-HSA-210430
R-HSA-2142789	Ubiquinol biosynthesis	1	32	0.00228849	0.595454	0.595454	1	9	0.000763488	9606	Homo sapiens	PDSS2		R-HSA-2162253
R-HSA-69273	Cyclin A/B1/B2 associated events during G2/M transition	1	32	0.00228849	0.595454	0.595454	2	25	0.0021208	9606	Homo sapiens	PKMYT1		R-HSA-170055;R-HSA-170116
R-HSA-8934593	Regulation of RUNX1 Expression and Activity	1	32	0.00228849	0.595454	0.595454	1	19	0.00161181	9606	Homo sapiens	PML		R-HSA-8938887
R-HSA-380284	Loss of proteins required for interphase microtubule organization from the centrosome	2	71	0.00507759	0.596212	0.596212	3	3	0.000254496	9606	Homo sapiens	CETN2;CEP131		R-HSA-380294;R-HSA-380272;R-HSA-380303
R-HSA-380259	Loss of Nlp from mitotic centrosomes	2	71	0.00507759	0.596212	0.596212	2	2	0.000169664	9606	Homo sapiens	CETN2;CEP131		R-HSA-380272;R-HSA-380303
R-HSA-69618	Mitotic Spindle Checkpoint	3	110	0.0078667	0.601369	0.601369	4	7	0.000593824	9606	Homo sapiens	PPP1CC;RPS27;DYNLL2		R-HSA-141409;R-HSA-141431;R-HSA-141422;R-HSA-141439
R-HSA-162909	Host Interactions of HIV factors	4	148	0.0105843	0.6022	0.6022	9	54	0.00458093	9606	Homo sapiens	HMGA1;PPIF;HLA-A;B2M		R-HSA-182243;R-HSA-180627;R-HSA-180630;R-HSA-182279;R-HSA-182263;R-HSA-180634;R-HSA-180632;R-HSA-182286;R-HSA-180622
R-HSA-75109	Triglyceride biosynthesis	1	33	0.00236001	0.606748	0.606748	1	7	0.000593824	9606	Homo sapiens	DGAT1		R-HSA-75900
R-HSA-1483213	Synthesis of PE	1	33	0.00236001	0.606748	0.606748	1	9	0.000763488	9606	Homo sapiens	PISD		R-HSA-1483212
R-HSA-5260271	Diseases of Immune System	1	33	0.00236001	0.606748	0.606748	1	14	0.00118765	9606	Homo sapiens	UNC93B1		R-HSA-5607838
R-HSA-5602358	Diseases associated with the TLR signaling cascade	1	33	0.00236001	0.606748	0.606748	1	14	0.00118765	9606	Homo sapiens	UNC93B1		R-HSA-5607838
R-HSA-9006335	Signaling by Erythropoietin	1	34	0.00243152	0.617727	0.617727	24	24	0.00203597	9606	Homo sapiens	LYN		R-HSA-9027273;R-HSA-9027272;R-HSA-9027275;R-HSA-9012651;R-HSA-9012650;R-HSA-9027274;R-HSA-9027373;R-HSA-9012654;R-HSA-9027425;R-HSA-9029155;R-HSA-9029158;R-HSA-9021627;R-HSA-9029149;R-HSA-9006332;R-HSA-9029151;R-HSA-9032478;R-HSA-9029150;R-HSA-9027281;R-HSA-9012657;R-HSA-9027280;R-HSA-9006323;R-HSA-9024723;R-HSA-9006325;R-HSA-9024726
R-HSA-112311	Neurotransmitter clearance	1	34	0.00243152	0.617727	0.617727	1	11	0.000933152	9606	Homo sapiens	ALDH2		R-HSA-380608
R-HSA-8940973	RUNX2 regulates osteoblast differentiation	1	34	0.00243152	0.617727	0.617727	2	24	0.00203597	9606	Homo sapiens	YES1		R-HSA-8937820;R-HSA-8937844
R-HSA-8854518	AURKA Activation by TPX2	2	74	0.00529214	0.618657	0.618657	2	2	0.000169664	9606	Homo sapiens	CETN2;CEP131		R-HSA-8853405;R-HSA-8853419
R-HSA-9006936	Signaling by TGF-beta family members	3	114	0.00815276	0.62536	0.62536	8	107	0.00907703	9606	Homo sapiens	PPP1CC;CGN;F11R		R-HSA-178178;R-HSA-2160931;R-HSA-2160932;R-HSA-2134532;R-HSA-2160935;R-HSA-2134519;R-HSA-2134506;R-HSA-178189
R-HSA-72086	mRNA Capping	1	35	0.00250304	0.628401	0.628401	10	11	0.000933152	9606	Homo sapiens	SPAG1		R-HSA-77073;R-HSA-77090;R-HSA-77077;R-HSA-77095;R-HSA-77078;R-HSA-77081;R-HSA-77083;R-HSA-77069;R-HSA-77085;R-HSA-77068
R-HSA-1250196	SHC1 events in ERBB2 signaling	1	35	0.00250304	0.628401	0.628401	4	6	0.000508992	9606	Homo sapiens	EGFR		R-HSA-1250195;R-HSA-1250486;R-HSA-1963578;R-HSA-1250463
R-HSA-2424491	DAP12 signaling	1	35	0.00250304	0.628401	0.628401	10	17	0.00144214	9606	Homo sapiens	B2M		R-HSA-2395412;R-HSA-2424484;R-HSA-210289;R-HSA-2424486;R-HSA-2424487;R-HSA-2424480;R-HSA-2396594;R-HSA-2424482;R-HSA-2395439;R-HSA-2395801
R-HSA-5656169	Termination of translesion DNA synthesis	1	35	0.00250304	0.628401	0.628401	5	9	0.000763488	9606	Homo sapiens	ISG15		R-HSA-5653766;R-HSA-5653780;R-HSA-5653786;R-HSA-5653754;R-HSA-5653770
R-HSA-418360	Platelet calcium homeostasis	1	35	0.00250304	0.628401	0.628401	2	8	0.000678656	9606	Homo sapiens	STIM1		R-HSA-434798;R-HSA-434700
R-HSA-888590	GABA synthesis, release, reuptake and degradation	1	35	0.00250304	0.628401	0.628401	2	9	0.000763488	9606	Homo sapiens	DNAJC5		R-HSA-888589;R-HSA-917744
R-HSA-199220	Vitamin B5 (pantothenate) metabolism	1	35	0.00250304	0.628401	0.628401	1	12	0.00101798	9606	Homo sapiens	SLC5A6		R-HSA-199206
R-HSA-1592389	Activation of Matrix Metalloproteinases	1	35	0.00250304	0.628401	0.628401	2	27	0.00229046	9606	Homo sapiens	CTSL		R-HSA-1592362;R-HSA-1604752
R-HSA-2206281	Mucopolysaccharidoses	1	35	0.00250304	0.628401	0.628401	1	22	0.0018663	9606	Homo sapiens	GALNS		R-HSA-2263490
R-HSA-211000	Gene Silencing by RNA	3	115	0.00822427	0.6312	0.6312	11	36	0.00305395	9606	Homo sapiens	TDRKH;SPAG1;MLLT4		R-HSA-5629237;R-HSA-5601926;R-HSA-5578742;R-HSA-5601888;R-HSA-5629203;R-HSA-5615682;R-HSA-5601919;R-HSA-5601897;R-HSA-9023909;R-HSA-5601883;R-HSA-203901
R-HSA-76046	RNA Polymerase III Transcription Initiation	1	36	0.00257455	0.638777	0.638777	6	13	0.00110282	9606	Homo sapiens	SPAG1		R-HSA-112150;R-HSA-76056;R-HSA-112152;R-HSA-83803;R-HSA-83805;R-HSA-76060
R-HSA-8863795	Downregulation of ERBB2 signaling	1	36	0.00257455	0.638777	0.638777	4	14	0.00118765	9606	Homo sapiens	EGFR		R-HSA-1963563;R-HSA-8864125;R-HSA-8863804;R-HSA-8864105
R-HSA-5626467	RHO GTPases activate IQGAPs	1	36	0.00257455	0.638777	0.638777	1	5	0.00042416	9606	Homo sapiens	CTNNB1		R-HSA-5672304
R-HSA-5223345	Miscellaneous transport and binding events	1	36	0.00257455	0.638777	0.638777	1	13	0.00110282	9606	Homo sapiens	LRRC8E		R-HSA-8941543
R-HSA-2173789	TGF-beta receptor signaling activates SMADs	1	36	0.00257455	0.638777	0.638777	2	39	0.00330845	9606	Homo sapiens	PPP1CC		R-HSA-178178;R-HSA-178189
R-HSA-1834949	Cytosolic sensors of pathogen-associated DNA	2	77	0.00550669	0.640131	0.640131	5	48	0.00407194	9606	Homo sapiens	SPAG1;CTNNB1		R-HSA-3134904;R-HSA-3134901;R-HSA-3134883;R-HSA-3134914;R-HSA-1964482
R-HSA-428157	Sphingolipid metabolism	4	157	0.0112279	0.648021	0.648021	4	62	0.00525959	9606	Homo sapiens	ASAH1;SPTLC2;PKD2;GLA		R-HSA-1605736;R-HSA-1606602;R-HSA-429698;R-HSA-428127
R-HSA-167158	Formation of the HIV-1 Early Elongation Complex	1	37	0.00264607	0.648864	0.648864	5	5	0.00042416	9606	Homo sapiens	SPAG1		R-HSA-167072;R-HSA-167089;R-HSA-167478;R-HSA-167083;R-HSA-167085
R-HSA-113418	Formation of the Early Elongation Complex	1	37	0.00264607	0.648864	0.648864	3	3	0.000254496	9606	Homo sapiens	SPAG1		R-HSA-113402;R-HSA-113407;R-HSA-112383
R-HSA-162588	Budding and maturation of HIV virion	1	37	0.00264607	0.648864	0.648864	2	3	0.000254496	9606	Homo sapiens	PPIF		R-HSA-3159227;R-HSA-3139027
R-HSA-399719	Trafficking of AMPA receptors	1	37	0.00264607	0.648864	0.648864	1	4	0.000339328	9606	Homo sapiens	MYO6		R-HSA-416320
R-HSA-203615	eNOS activation	1	37	0.00264607	0.648864	0.648864	4	20	0.00169664	9606	Homo sapiens	CAV1		R-HSA-202129;R-HSA-202144;R-HSA-203712;R-HSA-202110
R-HSA-442742	CREB phosphorylation through the activation of Ras	1	37	0.00264607	0.648864	0.648864	1	8	0.000678656	9606	Homo sapiens	RAF1		R-HSA-442737
R-HSA-187687	Signalling to ERKs	1	37	0.00264607	0.648864	0.648864	2	25	0.0021208	9606	Homo sapiens	RALB		R-HSA-171026;R-HSA-170991
R-HSA-975634	Retinoid metabolism and transport	2	79	0.00564972	0.653912	0.653912	4	28	0.0023753	9606	Homo sapiens	RETSAT;GPC1		R-HSA-8956427;R-HSA-2404131;R-HSA-2423785;R-HSA-2429643
R-HSA-1660661	Sphingolipid de novo biosynthesis	2	79	0.00564972	0.653912	0.653912	2	30	0.00254496	9606	Homo sapiens	SPTLC2;PKD2		R-HSA-429698;R-HSA-428127
R-HSA-1643713	Signaling by EGFR in Cancer	1	38	0.00271759	0.658671	0.658671	41	42	0.00356295	9606	Homo sapiens	EGFR		R-HSA-1218833;R-HSA-1225947;R-HSA-1226014;R-HSA-1225950;R-HSA-1225951;R-HSA-1226012;R-HSA-1225949;R-HSA-1220610;R-HSA-5637766;R-HSA-1220611;R-HSA-1248002;R-HSA-5637764;R-HSA-5637765;R-HSA-1220614;R-HSA-1220612;R-HSA-1220613;R-HSA-1169421;R-HSA-1248655;R-HSA-5637770;R-HSA-5637808;R-HSA-1225978;R-HSA-1247999;R-HSA-5638137;R-HSA-5637798;R-HSA-1247842;R-HSA-1247841;R-HSA-1226016;R-HSA-1225952;R-HSA-5…
R-HSA-1236382	Constitutive Signaling by Ligand-Responsive EGFR Cancer Variants	1	38	0.00271759	0.658671	0.658671	22	23	0.00195114	9606	Homo sapiens	EGFR		R-HSA-1218833;R-HSA-1225947;R-HSA-1226014;R-HSA-1225950;R-HSA-1225951;R-HSA-1226012;R-HSA-1225949;R-HSA-1220610;R-HSA-1220611;R-HSA-1247842;R-HSA-1247841;R-HSA-1226016;R-HSA-1225952;R-HSA-1220614;R-HSA-1220612;R-HSA-1225956;R-HSA-1220613;R-HSA-1247844;R-HSA-1225957;R-HSA-1225960;R-HSA-1225961;R-HSA-1169421
R-HSA-5637815	Signaling by Ligand-Responsive EGFR Variants in Cancer	1	38	0.00271759	0.658671	0.658671	22	23	0.00195114	9606	Homo sapiens	EGFR		R-HSA-1218833;R-HSA-1225947;R-HSA-1226014;R-HSA-1225950;R-HSA-1225951;R-HSA-1226012;R-HSA-1225949;R-HSA-1220610;R-HSA-1220611;R-HSA-1247842;R-HSA-1247841;R-HSA-1226016;R-HSA-1225952;R-HSA-1220614;R-HSA-1220612;R-HSA-1225956;R-HSA-1220613;R-HSA-1247844;R-HSA-1225957;R-HSA-1225960;R-HSA-1225961;R-HSA-1169421
R-HSA-1980145	Signaling by NOTCH2	1	38	0.00271759	0.658671	0.658671	2	20	0.00169664	9606	Homo sapiens	APH1A		R-HSA-2974731;R-HSA-157640
R-HSA-5625740	RHO GTPases activate PKNs	2	80	0.00572123	0.660643	0.660643	1	20	0.00169664	9606	Homo sapiens	MYL6;MYH9		R-HSA-419232
R-HSA-380270	Recruitment of mitotic centrosome proteins and complexes	2	81	0.00579275	0.667269	0.667269	3	3	0.000254496	9606	Homo sapiens	CETN2;CEP131		R-HSA-380311;R-HSA-380455;R-HSA-380283
R-HSA-167243	Tat-mediated HIV elongation arrest and recovery	1	39	0.0027891	0.668204	0.668204	3	3	0.000254496	9606	Homo sapiens	SPAG1		R-HSA-167090;R-HSA-167459;R-HSA-167148
R-HSA-167238	Pausing and recovery of Tat-mediated HIV elongation	1	39	0.0027891	0.668204	0.668204	2	2	0.000169664	9606	Homo sapiens	SPAG1		R-HSA-167076;R-HSA-167150
R-HSA-4791275	Signaling by WNT in cancer	1	39	0.0027891	0.668204	0.668204	5	16	0.00135731	9606	Homo sapiens	CTNNB1		R-HSA-5339713;R-HSA-4827388;R-HSA-4839635;R-HSA-4839634;R-HSA-4839638
R-HSA-6804758	Regulation of TP53 Activity through Acetylation	1	39	0.0027891	0.668204	0.668204	3	14	0.00118765	9606	Homo sapiens	PML		R-HSA-6805638;R-HSA-6805620;R-HSA-6805650
R-HSA-399721	Glutamate binding, activation of AMPA receptors and synaptic plasticity	1	39	0.0027891	0.668204	0.668204	1	9	0.000763488	9606	Homo sapiens	MYO6		R-HSA-416320
R-HSA-5365859	RA biosynthesis pathway	1	39	0.0027891	0.668204	0.668204	1	11	0.000933152	9606	Homo sapiens	RDH14		R-HSA-5419165
R-HSA-189451	Heme biosynthesis	1	39	0.0027891	0.668204	0.668204	1	16	0.00135731	9606	Homo sapiens	CPOX		R-HSA-189421
R-HSA-5696394	DNA Damage Recognition in GG-NER	1	40	0.00286062	0.677471	0.677471	5	5	0.00042416	9606	Homo sapiens	CETN2		R-HSA-6782943;R-HSA-5691006;R-HSA-5696655;R-HSA-5691004;R-HSA-5696664
R-HSA-167287	HIV elongation arrest and recovery	1	40	0.00286062	0.677471	0.677471	3	3	0.000254496	9606	Homo sapiens	SPAG1		R-HSA-167284;R-HSA-167288;R-HSA-167481
R-HSA-167290	Pausing and recovery of HIV elongation	1	40	0.00286062	0.677471	0.677471	2	2	0.000169664	9606	Homo sapiens	SPAG1		R-HSA-167282;R-HSA-167292
R-HSA-1482788	Acyl chain remodelling of PC	1	40	0.00286062	0.677471	0.677471	2	9	0.000763488	9606	Homo sapiens	LPCAT2		R-HSA-1482533;R-HSA-1482547
R-HSA-8868766	rRNA processing in the mitochondrion	1	40	0.00286062	0.677471	0.677471	1	6	0.000508992	9606	Homo sapiens	MT-CO1		R-HSA-6785722
R-HSA-380287	Centrosome maturation	2	83	0.00593578	0.680208	0.680208	6	6	0.000508992	9606	Homo sapiens	CETN2;CEP131		R-HSA-380311;R-HSA-380455;R-HSA-380294;R-HSA-380272;R-HSA-380303;R-HSA-380283
R-HSA-5633008	TP53 Regulates Transcription of Cell Death Genes	2	83	0.00593578	0.680208	0.680208	2	68	0.00576858	9606	Homo sapiens	BID		R-HSA-6791285;R-HSA-6791291
R-HSA-425366	Transport of bile salts and organic acids, metal ions and amine compounds	4	165	0.0118	0.685711	0.685711	3	66	0.00559891	9606	Homo sapiens	SLC6A6;SLC44A1;SLC44A2;BSG		R-HSA-433698;R-HSA-351987;R-HSA-444433
R-HSA-5628897	TP53 Regulates Metabolic Genes	3	125	0.00893943	0.686116	0.686116	1	34	0.00288429	9606	Homo sapiens	MT-CO1;COX6A1;LRPPRC		R-HSA-163214
R-HSA-5663213	RHO GTPases Activate WASPs and WAVEs	1	41	0.00293213	0.68648	0.68648	6	10	0.00084832	9606	Homo sapiens	BAIAP2		R-HSA-2130194;R-HSA-2029469;R-HSA-2029466;R-HSA-442592;R-HSA-2029465;R-HSA-2197690
R-HSA-3232142	SUMOylation of ubiquitinylation proteins	1	41	0.00293213	0.68648	0.68648	1	3	0.000254496	9606	Homo sapiens	PML		R-HSA-3000434
R-HSA-202131	Metabolism of nitric oxide	1	41	0.00293213	0.68648	0.68648	8	26	0.00220563	9606	Homo sapiens	CAV1		R-HSA-202129;R-HSA-202144;R-HSA-203712;R-HSA-203716;R-HSA-203625;R-HSA-203662;R-HSA-202110;R-HSA-203565
R-HSA-203765	eNOS activation and regulation	1	41	0.00293213	0.68648	0.68648	8	26	0.00220563	9606	Homo sapiens	CAV1		R-HSA-202129;R-HSA-202144;R-HSA-203712;R-HSA-203716;R-HSA-203625;R-HSA-203662;R-HSA-202110;R-HSA-203565
R-HSA-180910	Vpr-mediated nuclear import of PICs	1	42	0.00300365	0.695239	0.695239	2	2	0.000169664	9606	Homo sapiens	HMGA1		R-HSA-180627;R-HSA-180622
R-HSA-3296482	Defects in vitamin and cofactor metabolism	1	42	0.00300365	0.695239	0.695239	2	22	0.0018663	9606	Homo sapiens	MUT		R-HSA-3322135;R-HSA-3322971
R-HSA-71182	Phenylalanine and tyrosine catabolism	1	42	0.00300365	0.695239	0.695239	1	12	0.00101798	9606	Homo sapiens	GSTZ1		R-HSA-71173
R-HSA-8964043	Plasma lipoprotein clearance	1	42	0.00300365	0.695239	0.695239	2	35	0.00296912	9606	Homo sapiens	NPC2		R-HSA-8876484;R-HSA-8876472
R-HSA-1368108	BMAL1:CLOCK,NPAS2 activates circadian gene expression	1	42	0.00300365	0.695239	0.695239	1	20	0.00169664	9606	Homo sapiens	LYN		R-HSA-879724
R-HSA-68877	Mitotic Prometaphase	5	207	0.0148037	0.695945	0.695945	7	15	0.00127248	9606	Homo sapiens	PPP1CC;RPS27;CETN2;CEP131;DYNLL2		R-HSA-2484822;R-HSA-375302;R-HSA-380316;R-HSA-380508;R-HSA-1638803;R-HSA-2468287;R-HSA-1638821
R-HSA-1592230	Mitochondrial biogenesis	3	127	0.00908246	0.696336	0.696336	3	36	0.00305395	9606	Homo sapiens	LYN;CHCHD6;IDH2		R-HSA-8949609;R-HSA-1592238;R-HSA-5688289
R-HSA-1660662	Glycosphingolipid metabolism	2	86	0.00615033	0.698844	0.698844	2	32	0.00271463	9606	Homo sapiens	ASAH1;GLA		R-HSA-1605736;R-HSA-1606602
R-HSA-5617833	Cilium Assembly	5	208	0.0148752	0.699922	0.699922	24	50	0.0042416	9606	Homo sapiens	CETN2;CEP131;TRIP11;PKD2;DYNLL2		R-HSA-5624949;R-HSA-5626228;R-HSA-5620918;R-HSA-5625424;R-HSA-5626227;R-HSA-5620914;R-HSA-5625426;R-HSA-5623519;R-HSA-5623513;R-HSA-5620921;R-HSA-5626681;R-HSA-5624952;R-HSA-5617816;R-HSA-5638009;R-HSA-5623525;R-HSA-5617828;R-HSA-5623524;R-HSA-5623527;R-HSA-5623521;R-HSA-5625421;R-HSA-5626220;R-HSA-5626223;R-HSA-5625416;R-HSA-5626699
R-HSA-933541	TRAF6 mediated IRF7 activation	1	43	0.00307516	0.703753	0.703753	5	11	0.000933152	9606	Homo sapiens	MAVS		R-HSA-918230;R-HSA-933527;R-HSA-933525;R-HSA-933538;R-HSA-933537
R-HSA-114604	GPVI-mediated activation cascade	1	43	0.00307516	0.703753	0.703753	5	25	0.0021208	9606	Homo sapiens	LYN		R-HSA-139842;R-HSA-453200;R-HSA-437118;R-HSA-114600;R-HSA-453183
R-HSA-381771	Synthesis, secretion, and inactivation of Glucagon-like Peptide-1 (GLP-1)	1	43	0.00307516	0.703753	0.703753	1	7	0.000593824	9606	Homo sapiens	CTNNB1		R-HSA-381799
R-HSA-5689896	Ovarian tumor domain proteases	1	43	0.00307516	0.703753	0.703753	1	14	0.00118765	9606	Homo sapiens	MAVS		R-HSA-936381
R-HSA-8941326	RUNX2 regulates bone development	1	43	0.00307516	0.703753	0.703753	2	32	0.00271463	9606	Homo sapiens	YES1		R-HSA-8937820;R-HSA-8937844
R-HSA-2151201	Transcriptional activation of mitochondrial biogenesis	2	87	0.00622184	0.704853	0.704853	2	32	0.00271463	9606	Homo sapiens	LYN;IDH2		R-HSA-1592238;R-HSA-5688289
R-HSA-3769402	Deactivation of the beta-catenin transactivating complex	1	44	0.00314668	0.71203	0.71203	11	14	0.00118765	9606	Homo sapiens	CTNNB1		R-HSA-3361751;R-HSA-5368580;R-HSA-3769391;R-HSA-3772430;R-HSA-3769393;R-HSA-3769392;R-HSA-3364042;R-HSA-3769394;R-HSA-5665608;R-HSA-3769383;R-HSA-5626938
R-HSA-1839124	FGFR1 mutant receptor activation	1	44	0.00314668	0.71203	0.71203	7	25	0.0021208	9606	Homo sapiens	MYO18A		R-HSA-1839039;R-HSA-1839112;R-HSA-1839080;R-HSA-1839065;R-HSA-1839078;R-HSA-1839031;R-HSA-1839091
R-HSA-2024096	HS-GAG degradation	1	44	0.00314668	0.71203	0.71203	3	14	0.00118765	9606	Homo sapiens	GPC1		R-HSA-1667005;R-HSA-2024084;R-HSA-1678694
R-HSA-168276	NS1 Mediated Effects on Host Pathways	1	44	0.00314668	0.71203	0.71203	1	6	0.000508992	9606	Homo sapiens	ISG15		R-HSA-1176059
R-HSA-419037	NCAM1 interactions	1	44	0.00314668	0.71203	0.71203	1	10	0.00084832	9606	Homo sapiens	PRNP		R-HSA-375154
R-HSA-74217	Purine salvage	1	44	0.00314668	0.71203	0.71203	1	11	0.000933152	9606	Homo sapiens	DGUOK		R-HSA-74207
R-HSA-71064	Lysine catabolism	1	44	0.00314668	0.71203	0.71203	1	13	0.00110282	9606	Homo sapiens	DLST		R-HSA-71037
R-HSA-196757	Metabolism of folate and pterines	1	44	0.00314668	0.71203	0.71203	2	29	0.00246013	9606	Homo sapiens	MTHFD2		R-HSA-6801462;R-HSA-6801328
R-HSA-73864	RNA Polymerase I Transcription	2	89	0.00636487	0.716572	0.716572	8	14	0.00118765	9606	Homo sapiens	SPAG1;PTRF		R-HSA-74993;R-HSA-74992;R-HSA-74994;R-HSA-73865;R-HSA-73769;R-HSA-74986;R-HSA-73757;R-HSA-73758
R-HSA-1226099	Signaling by FGFR in disease	2	89	0.00636487	0.716572	0.716572	11	106	0.0089922	9606	Homo sapiens	SPAG1;MYO18A		R-HSA-1839100;R-HSA-1839039;R-HSA-1839112;R-HSA-1839080;R-HSA-1839065;R-HSA-1839098;R-HSA-8851710;R-HSA-1839094;R-HSA-1839078;R-HSA-1839031;R-HSA-1839091
R-HSA-176033	Interactions of Vpr with host cellular proteins	1	45	0.00321819	0.720076	0.720076	2	4	0.000339328	9606	Homo sapiens	HMGA1		R-HSA-180627;R-HSA-180622
R-HSA-5675221	Negative regulation of MAPK pathway	1	45	0.00321819	0.720076	0.720076	5	12	0.00101798	9606	Homo sapiens	RAF1		R-HSA-5675431;R-HSA-5674140;R-HSA-5675194;R-HSA-5675433;R-HSA-5675417
R-HSA-6785470	tRNA processing in the mitochondrion	1	45	0.00321819	0.720076	0.720076	1	3	0.000254496	9606	Homo sapiens	MT-CO1		R-HSA-6785722
R-HSA-749476	RNA Polymerase III Abortive And Retractive Initiation	1	46	0.00328971	0.727898	0.727898	13	13	0.00110282	9606	Homo sapiens	SPAG1		R-HSA-113442;R-HSA-113449;R-HSA-113705;R-HSA-113454;R-HSA-112149;R-HSA-112055;R-HSA-112150;R-HSA-112054;R-HSA-112153;R-HSA-112152;R-HSA-112155;R-HSA-112156;R-HSA-76060
R-HSA-74158	RNA Polymerase III Transcription	1	46	0.00328971	0.727898	0.727898	18	25	0.0021208	9606	Homo sapiens	SPAG1		R-HSA-113442;R-HSA-113446;R-HSA-113449;R-HSA-113705;R-HSA-113451;R-HSA-113454;R-HSA-112149;R-HSA-112055;R-HSA-112150;R-HSA-112054;R-HSA-112153;R-HSA-76056;R-HSA-112152;R-HSA-83803;R-HSA-112155;R-HSA-83805;R-HSA-76060;R-HSA-112156
R-HSA-6802948	Signaling by high-kinase activity BRAF mutants	1	46	0.00328971	0.727898	0.727898	1	6	0.000508992	9606	Homo sapiens	RAF1		R-HSA-6802912
R-HSA-1566948	Elastic fibre formation	1	46	0.00328971	0.727898	0.727898	1	17	0.00144214	9606	Homo sapiens	ITGA5		R-HSA-2328037
R-HSA-2500257	Resolution of Sister Chromatid Cohesion	3	134	0.00958307	0.73012	0.73012	4	8	0.000678656	9606	Homo sapiens	PPP1CC;RPS27;DYNLL2		R-HSA-2484822;R-HSA-1638803;R-HSA-2468287;R-HSA-1638821
R-HSA-2980736	Peptide hormone metabolism	3	134	0.00958307	0.73012	0.73012	4	60	0.00508992	9606	Homo sapiens	CTSZ;CTNNB1;CTSD		R-HSA-381799;R-HSA-2022412;R-HSA-2022381;R-HSA-2022403
R-HSA-1852241	Organelle biogenesis and maintenance	8	335	0.0239577	0.730639	0.730639	27	86	0.00729555	9606	Homo sapiens	LYN;CETN2;CHCHD6;IDH2;CEP131;TRIP11;PKD2;DYNLL2		R-HSA-5625424;R-HSA-5625426;R-HSA-5623519;R-HSA-5623513;R-HSA-5617816;R-HSA-5625421;R-HSA-5625416;R-HSA-5626699;R-HSA-5624949;R-HSA-5626228;R-HSA-8949609;R-HSA-5620918;R-HSA-5626227;R-HSA-5620914;R-HSA-5620921;R-HSA-5626681;R-HSA-5624952;R-HSA-5638009;R-HSA-5623525;R-HSA-5617828;R-HSA-5623524;R-HSA-5623527;R-HSA-5623521;R-HSA-1592238;R-HSA-5688289;R-HSA-5626220;R-HSA-5626223
R-HSA-2565942	Regulation of PLK1 Activity at G2/M Transition	2	92	0.00657942	0.733416	0.733416	4	12	0.00101798	9606	Homo sapiens	CETN2;CEP131		R-HSA-3000319;R-HSA-2574845;R-HSA-3000310;R-HSA-2574840
R-HSA-5674135	MAP2K and MAPK activation	1	47	0.00336122	0.735502	0.735502	6	8	0.000678656	9606	Homo sapiens	RAF1		R-HSA-5674132;R-HSA-5672980;R-HSA-5674130;R-HSA-5672978;R-HSA-5672972;R-HSA-5672973
R-HSA-5696395	Formation of Incision Complex in GG-NER	1	47	0.00336122	0.735502	0.735502	6	10	0.00084832	9606	Homo sapiens	CETN2		R-HSA-6790487;R-HSA-6790454;R-HSA-5690996;R-HSA-5689861;R-HSA-5696670;R-HSA-5691000
R-HSA-73779	RNA Polymerase II Transcription Pre-Initiation And Promoter Opening	1	47	0.00336122	0.735502	0.735502	3	5	0.00042416	9606	Homo sapiens	SPAG1		R-HSA-109639;R-HSA-75095;R-HSA-109638
R-HSA-400508	Incretin synthesis, secretion, and inactivation	1	47	0.00336122	0.735502	0.735502	1	14	0.00118765	9606	Homo sapiens	CTNNB1		R-HSA-381799
R-HSA-6811442	Intra-Golgi and retrograde Golgi-to-ER traffic	5	218	0.0155904	0.737709	0.737709	8	48	0.00407194	9606	Homo sapiens	GOLGA5;GOSR2;TRIP11;DYNLL2;BET1L		R-HSA-8849350;R-HSA-8847638;R-HSA-8847637;R-HSA-8847635;R-HSA-8847875;R-HSA-6811433;R-HSA-8849353;R-HSA-8847544
R-HSA-6794362	Protein-protein interactions at synapses	2	93	0.00665093	0.738839	0.738839	3	33	0.00279946	9606	Homo sapiens	EPB41L5;PPFIA1		R-HSA-6797553;R-HSA-6797568;R-HSA-388824
R-HSA-6802946	Signaling by moderate kinase activity BRAF mutants	1	48	0.00343274	0.742893	0.742893	6	7	0.000593824	9606	Homo sapiens	RAF1		R-HSA-6802919;R-HSA-6802916;R-HSA-6802914;R-HSA-6803230;R-HSA-8936676;R-HSA-6802921
R-HSA-110313	Translesion synthesis by Y family DNA polymerases bypasses lesions on DNA template	1	48	0.00343274	0.742893	0.742893	5	28	0.0023753	9606	Homo sapiens	ISG15		R-HSA-5653766;R-HSA-5653780;R-HSA-5653786;R-HSA-5653754;R-HSA-5653770
R-HSA-168253	Host Interactions with Influenza Factors	1	48	0.00343274	0.742893	0.742893	1	8	0.000678656	9606	Homo sapiens	ISG15		R-HSA-1176059
R-HSA-69231	Cyclin D associated events in G1	1	48	0.00343274	0.742893	0.742893	1	14	0.00118765	9606	Homo sapiens	LYN		R-HSA-8942607
R-HSA-69236	G1 Phase	1	48	0.00343274	0.742893	0.742893	1	14	0.00118765	9606	Homo sapiens	LYN		R-HSA-8942607
R-HSA-71240	Tryptophan catabolism	1	48	0.00343274	0.742893	0.742893	1	16	0.00135731	9606	Homo sapiens	CCBL2		R-HSA-901097
R-HSA-1839126	FGFR2 mutant receptor activation	1	48	0.00343274	0.742893	0.742893	1	18	0.00152698	9606	Homo sapiens	SPAG1		R-HSA-8851710
R-HSA-438064	Post NMDA receptor activation events	1	48	0.00343274	0.742893	0.742893	1	19	0.00161181	9606	Homo sapiens	RAF1		R-HSA-442737
R-HSA-1169410	Antiviral mechanism by IFN-stimulated genes	2	94	0.00672245	0.744167	0.744167	17	31	0.00262979	9606	Homo sapiens	ISG15;OASL		R-HSA-1678841;R-HSA-936462;R-HSA-1169395;R-HSA-1678843;R-HSA-1169394;R-HSA-1678842;R-HSA-1169397;R-HSA-1169399;R-HSA-1169398;R-HSA-8985153;R-HSA-1169307;R-HSA-1176059;R-HSA-1169403;R-HSA-1169402;R-HSA-1169405;R-HSA-1169404;R-HSA-1169406
R-HSA-6806667	Metabolism of fat-soluble vitamins	2	94	0.00672245	0.744167	0.744167	4	34	0.00288429	9606	Homo sapiens	RETSAT;GPC1		R-HSA-8956427;R-HSA-2404131;R-HSA-2423785;R-HSA-2429643
R-HSA-1614635	Sulfur amino acid metabolism	2	94	0.00672245	0.744167	0.744167	3	37	0.00313879	9606	Homo sapiens	ETHE1;SQRDL		R-HSA-1614665;R-HSA-1614618;R-HSA-1614605
R-HSA-6809371	Formation of the cornified envelope	3	138	0.00986913	0.748063	0.748063	13	27	0.00229046	9606	Homo sapiens	PKP2;PKP3;PPL		R-HSA-6814695;R-HSA-6814374;R-HSA-6810894;R-HSA-6814734;R-HSA-6814764;R-HSA-6814187;R-HSA-6810357;R-HSA-6814387;R-HSA-6811539;R-HSA-8942224;R-HSA-6810843;R-HSA-6814298;R-HSA-6810937
R-HSA-6802955	Paradoxical activation of RAF signaling by kinase inactive BRAF	1	49	0.00350426	0.750079	0.750079	6	7	0.000593824	9606	Homo sapiens	RAF1		R-HSA-6802918;R-HSA-8936731;R-HSA-6803234;R-HSA-6802943;R-HSA-6802942;R-HSA-6802941
R-HSA-167200	Formation of HIV-1 elongation complex containing HIV-1 Tat	1	49	0.00350426	0.750079	0.750079	4	5	0.00042416	9606	Homo sapiens	SPAG1		R-HSA-170706;R-HSA-170704;R-HSA-167191;R-HSA-167196
R-HSA-196741	Cobalamin (Cbl, vitamin B12) transport and metabolism	1	49	0.00350426	0.750079	0.750079	2	30	0.00254496	9606	Homo sapiens	MUT		R-HSA-71010;R-HSA-3159259
R-HSA-5663205	Infectious disease	13	537	0.0384038	0.751166	0.751166	101	330	0.0279946	9606	Homo sapiens	RPS28;RPS27;RPL31;SPAG1;HMGA1;PPIF;RPL35A;CTNNB1;ISG15;HLA-A;B2M		R-HSA-8951690;R-HSA-182279;R-HSA-175108;R-HSA-182795;R-HSA-182286;R-HSA-167181;R-HSA-175117;R-HSA-8876948;R-HSA-167191;R-HSA-167192;R-HSA-162590;R-HSA-167196;R-HSA-167197;R-HSA-9613490;R-HSA-167459;R-HSA-9613498;R-HSA-167468;R-HSA-167474;R-HSA-167478;R-HSA-173111;R-HSA-167477;R-HSA-173115;R-HSA-167481;R-HSA-167484;R-HSA-175174;R-HSA-8876993;R-HSA-173642;R-HSA-182859;R-HSA-192841;R-HSA-8877003;R-H…
R-HSA-167152	Formation of HIV elongation complex in the absence of HIV Tat	1	50	0.00357577	0.757065	0.757065	2	2	0.000169664	9606	Homo sapiens	SPAG1		R-HSA-167077;R-HSA-167084
R-HSA-73762	RNA Polymerase I Transcription Initiation	1	50	0.00357577	0.757065	0.757065	3	6	0.000508992	9606	Homo sapiens	SPAG1		R-HSA-73865;R-HSA-73757;R-HSA-73758
R-HSA-442660	Na+/Cl- dependent neurotransmitter transporters	1	50	0.00357577	0.757065	0.757065	1	15	0.00127248	9606	Homo sapiens	SLC6A6		R-HSA-351987
R-HSA-380320	Recruitment of NuMA to mitotic centrosomes	2	97	0.00693699	0.759598	0.759598	2	2	0.000169664	9606	Homo sapiens	CETN2;CEP131		R-HSA-380316;R-HSA-380508
R-HSA-388841	Costimulation by the CD28 family	2	97	0.00693699	0.759598	0.759598	3	34	0.00288429	9606	Homo sapiens	LYN;YES1		R-HSA-388833;R-HSA-388829;R-HSA-388831
R-HSA-73621	Pyrimidine catabolism	1	51	0.00364729	0.763856	0.763856	1	17	0.00144214	9606	Homo sapiens	NT5E		R-HSA-109291
R-HSA-174824	Plasma lipoprotein assembly, remodeling, and clearance	2	98	0.00700851	0.764559	0.764559	4	84	0.00712589	9606	Homo sapiens	NPC2;LMF2		R-HSA-8876484;R-HSA-6785181;R-HSA-6785178;R-HSA-8876472
R-HSA-5620912	Anchoring of the basal body to the plasma membrane	2	99	0.00708003	0.769432	0.769432	8	9	0.000763488	9606	Homo sapiens	CETN2;CEP131		R-HSA-5626228;R-HSA-5626227;R-HSA-5626220;R-HSA-5626223;R-HSA-5626681;R-HSA-5617816;R-HSA-5626699;R-HSA-5638009
R-HSA-112310	Neurotransmitter release cycle	2	99	0.00708003	0.769432	0.769432	12	36	0.00305395	9606	Homo sapiens	DNAJC5;PPFIA1		R-HSA-888589;R-HSA-380869;R-HSA-380901;R-HSA-372529;R-HSA-374899;R-HSA-210426;R-HSA-380574;R-HSA-372505;R-HSA-380905;R-HSA-210430;R-HSA-917744;R-HSA-374922
R-HSA-167162	RNA Polymerase II HIV Promoter Escape	1	52	0.0037188	0.770457	0.770457	9	9	0.000763488	9606	Homo sapiens	SPAG1		R-HSA-167474;R-HSA-9613490;R-HSA-167136;R-HSA-167121;R-HSA-9613498;R-HSA-167115;R-HSA-167113;R-HSA-167468;R-HSA-167117
R-HSA-167161	HIV Transcription Initiation	1	52	0.0037188	0.770457	0.770457	4	4	0.000339328	9606	Homo sapiens	SPAG1		R-HSA-167477;R-HSA-167130;R-HSA-167134;R-HSA-167118
R-HSA-75953	RNA Polymerase II Transcription Initiation	1	52	0.0037188	0.770457	0.770457	3	3	0.000254496	9606	Homo sapiens	SPAG1		R-HSA-75861;R-HSA-75864;R-HSA-75866
R-HSA-167169	HIV Transcription Elongation	1	52	0.0037188	0.770457	0.770457	14	15	0.00127248	9606	Homo sapiens	SPAG1		R-HSA-167072;R-HSA-167147;R-HSA-167083;R-HSA-167087;R-HSA-167181;R-HSA-167085;R-HSA-170706;R-HSA-170704;R-HSA-167089;R-HSA-167478;R-HSA-167191;R-HSA-167192;R-HSA-167196;R-HSA-167197
R-HSA-167246	Tat-mediated elongation of the HIV-1 transcript	1	52	0.0037188	0.770457	0.770457	7	8	0.000678656	9606	Homo sapiens	SPAG1		R-HSA-170706;R-HSA-170704;R-HSA-167191;R-HSA-167192;R-HSA-167196;R-HSA-167197;R-HSA-167181
R-HSA-190828	Gap junction trafficking	1	52	0.0037188	0.770457	0.770457	2	20	0.00169664	9606	Homo sapiens	MYO6		R-HSA-190519;R-HSA-190829
R-HSA-1638074	Keratan sulfate/keratin metabolism	1	52	0.0037188	0.770457	0.770457	1	15	0.00127248	9606	Homo sapiens	GALNS		R-HSA-1630304
R-HSA-8878166	Transcriptional regulation by RUNX2	3	144	0.0102982	0.773177	0.773177	4	84	0.00712589	9606	Homo sapiens	YES1;ITGA5		R-HSA-8937820;R-HSA-8939667;R-HSA-8937844;R-HSA-8939670
R-HSA-73776	RNA Polymerase II Promoter Escape	1	53	0.00379032	0.776874	0.776874	7	7	0.000593824	9606	Homo sapiens	SPAG1		R-HSA-75873;R-HSA-111264;R-HSA-76576;R-HSA-9613494;R-HSA-75850;R-HSA-9613497;R-HSA-75869
R-HSA-5655302	Signaling by FGFR1 in disease	1	53	0.00379032	0.776874	0.776874	10	35	0.00296912	9606	Homo sapiens	MYO18A		R-HSA-1839100;R-HSA-1839039;R-HSA-1839112;R-HSA-1839080;R-HSA-1839065;R-HSA-1839098;R-HSA-1839094;R-HSA-1839078;R-HSA-1839031;R-HSA-1839091
R-HSA-77286	mitochondrial fatty acid beta-oxidation of saturated fatty acids	1	53	0.00379032	0.776874	0.776874	2	29	0.00246013	9606	Homo sapiens	ACADM		R-HSA-77345;R-HSA-77338
R-HSA-400253	Circadian Clock	2	101	0.00722306	0.778915	0.778915	4	59	0.00500509	9606	Homo sapiens	LYN;PPP1CC		R-HSA-879724;R-HSA-1368065;R-HSA-1801587;R-HSA-400382
R-HSA-8963899	Plasma lipoprotein remodeling	1	54	0.00386183	0.783113	0.783113	2	30	0.00254496	9606	Homo sapiens	LMF2		R-HSA-6785181;R-HSA-6785178
R-HSA-189445	Metabolism of porphyrins	1	54	0.00386183	0.783113	0.783113	1	21	0.00178147	9606	Homo sapiens	CPOX		R-HSA-189421
R-HSA-442755	Activation of NMDA receptors and postsynaptic events	1	54	0.00386183	0.783113	0.783113	1	25	0.0021208	9606	Homo sapiens	RAF1		R-HSA-442737
R-HSA-1483257	Phospholipid metabolism	7	315	0.0225274	0.786905	0.786905	8	218	0.0184934	9606	Homo sapiens	DGAT1;SLC44A1;AGPAT9;SLC44A2;MBOAT7;LPCAT2;PISD		R-HSA-1482598;R-HSA-1482533;R-HSA-1482626;R-HSA-1482547;R-HSA-444433;R-HSA-1483212;R-HSA-75885;R-HSA-1482889
R-HSA-983695	Antigen activates B Cell Receptor (BCR) leading to generation of second messengers	2	103	0.00736609	0.788055	0.788055	7	25	0.0021208	9606	Homo sapiens	LYN;STIM1		R-HSA-9606163;R-HSA-983709;R-HSA-2089943;R-HSA-2089927;R-HSA-434798;R-HSA-1168376;R-HSA-434700
R-HSA-2029481	FCGR activation	2	103	0.00736609	0.788055	0.788055	1	6	0.000508992	9606	Homo sapiens	LYN;YES1		R-HSA-2029459
R-HSA-76042	RNA Polymerase II Transcription Initiation And Promoter Clearance	1	55	0.00393335	0.789177	0.789177	11	11	0.000933152	9606	Homo sapiens	SPAG1		R-HSA-75873;R-HSA-111264;R-HSA-76576;R-HSA-75861;R-HSA-9613494;R-HSA-75864;R-HSA-75866;R-HSA-75850;R-HSA-9613497;R-HSA-75949;R-HSA-75869
R-HSA-5620920	Cargo trafficking to the periciliary membrane	1	55	0.00393335	0.789177	0.789177	9	27	0.00229046	9606	Homo sapiens	PKD2		R-HSA-5623525;R-HSA-5623524;R-HSA-5623527;R-HSA-5620918;R-HSA-5623521;R-HSA-5620914;R-HSA-5623519;R-HSA-5623513;R-HSA-5620921
R-HSA-437239	Recycling pathway of L1	1	55	0.00393335	0.789177	0.789177	1	14	0.00118765	9606	Homo sapiens	NUMB		R-HSA-443783
R-HSA-195258	RHO GTPase Effectors	7	316	0.0225989	0.789564	0.789564	15	107	0.00907703	9606	Homo sapiens	PPP1CC;MYL6;RPS27;MYH9;CTNNB1;BAIAP2;DYNLL2		R-HSA-2029469;R-HSA-2029466;R-HSA-5668978;R-HSA-442592;R-HSA-419232;R-HSA-5672304;R-HSA-5666160;R-HSA-2029465;R-HSA-5666129;R-HSA-5666169;R-HSA-2130194;R-HSA-5668932;R-HSA-5671919;R-HSA-2197690;R-HSA-419197
R-HSA-5663220	RHO GTPases Activate Formins	3	149	0.0106558	0.79251	0.79251	3	27	0.00229046	9606	Homo sapiens	PPP1CC;RPS27;DYNLL2		R-HSA-5666160;R-HSA-5666129;R-HSA-5666169
R-HSA-2029480	Fcgamma receptor (FCGR) dependent phagocytosis	4	193	0.0138025	0.79477	0.79477	8	42	0.00356295	9606	Homo sapiens	LYN;YES1;MYH9;BAIAP2		R-HSA-2130194;R-HSA-2029469;R-HSA-2029466;R-HSA-442592;R-HSA-2029465;R-HSA-2029476;R-HSA-2197690;R-HSA-2029459
R-HSA-6781823	Formation of TC-NER Pre-Incision Complex	1	56	0.00400486	0.795072	0.795072	7	7	0.000593824	9606	Homo sapiens	SPAG1		R-HSA-6782069;R-HSA-6782004;R-HSA-6781840;R-HSA-6781824;R-HSA-6781867;R-HSA-6781818;R-HSA-6781833
R-HSA-72165	mRNA Splicing - Minor Pathway	1	56	0.00400486	0.795072	0.795072	5	5	0.00042416	9606	Homo sapiens	SPAG1		R-HSA-75079;R-HSA-75081;R-HSA-75080;R-HSA-75083;R-HSA-75082
R-HSA-3781865	Diseases of glycosylation	4	194	0.013874	0.798028	0.798028	13	77	0.00653207	9606	Homo sapiens	EXT2;GPC1;RFT1;ALG2		R-HSA-4570573;R-HSA-9036289;R-HSA-3656254;R-HSA-9036290;R-HSA-4420365;R-HSA-9036283;R-HSA-3656261;R-HSA-3560804;R-HSA-9036285;R-HSA-3560802;R-HSA-3656257;R-HSA-3656267;R-HSA-4549368
R-HSA-5693571	Nonhomologous End-Joining (NHEJ)	1	57	0.00407638	0.800803	0.800803	4	13	0.00110282	9606	Homo sapiens	MDC1		R-HSA-5686900;R-HSA-5686704;R-HSA-5693599;R-HSA-5686685
R-HSA-452723	Transcriptional regulation of pluripotent stem cells	1	57	0.00407638	0.800803	0.800803	5	35	0.00296912	9606	Homo sapiens	SPAG1		R-HSA-452838;R-HSA-452894;R-HSA-480301;R-HSA-452392;R-HSA-480520
R-HSA-73893	DNA Damage Bypass	1	58	0.00414789	0.806374	0.806374	5	34	0.00288429	9606	Homo sapiens	ISG15		R-HSA-5653766;R-HSA-5653780;R-HSA-5653786;R-HSA-5653754;R-HSA-5653770
R-HSA-9018519	Estrogen-dependent gene expression	3	153	0.0109419	0.806974	0.806974	6	66	0.00559891	9606	Homo sapiens	SPAG1;CTSD		R-HSA-9012315;R-HSA-9012319;R-HSA-9023840;R-HSA-9011971;R-HSA-9023845;R-HSA-9023846
R-HSA-193704	p75 NTR receptor-mediated signalling	2	108	0.00772366	0.809465	0.809465	3	50	0.0042416	9606	Homo sapiens	APH1A;ADAM17		R-HSA-193682;R-HSA-205112;R-HSA-193679
R-HSA-3700989	Transcriptional Regulation by TP53	11	486	0.0347565	0.810346	0.810346	10	259	0.0219715	9606	Homo sapiens	MDC1;MT-CO1;SPAG1;BID;COX6A1;LRPPRC;PML;BANP		R-HSA-6805638;R-HSA-6797606;R-HSA-6791285;R-HSA-6805620;R-HSA-6805650;R-HSA-6797616;R-HSA-6797712;R-HSA-6791291;R-HSA-163214;R-HSA-3221982
R-HSA-8856825	Cargo recognition for clathrin-mediated endocytosis	2	109	0.00779518	0.813509	0.813509	2	14	0.00118765	9606	Homo sapiens	VAMP8;EGFR		R-HSA-8866279;R-HSA-8867613
R-HSA-1430728	Metabolism	94	3585	0.256383	0.814255	0.814255	193	2184	0.185273	9606	Homo sapiens	SLC44A1;MT-CO1;SLC44A2;RPL31;CCBL2;NDUFA10;CPOX;MSMO1;SQRDL;COX6A1;PKD2;HS2ST1;PPP1CC;NSDHL;SPTLC2;ALDH2;BSG;NUDT19;ACADM;ACAD10;BCKDHA;STARD3;DGAT1;ACSL1;ELOVL5;GPT2;BCKDHB;NDUFC2;NDUFC1;MUT;PISD;SLC5A6;BDH1;ACOX1;MTHFD2;EHHADH;ETHE1;IMPAD1;RFT1;SLC27A3;ASAH1;OAT;RETSAT;AGPAT9;ETFDH;DLST;BPHL;SLC9A1;HRSP12;DGUOK;HMGCL;NT5E;GPC1;PDSS2;NDUFV2;NDUFV1;FDFT1;LYN;TIMMDC1;NDUFA6;MBOAT7;CAV1;IDH2;RPL35A…		R-HSA-71173;R-HSA-1655826;R-HSA-70666;R-HSA-8953499;R-HSA-1368065;R-HSA-70679;R-HSA-444433;R-HSA-2022919;R-HSA-77338;R-HSA-196126;R-HSA-3165230;R-HSA-77345;R-HSA-8933547;R-HSA-199206;R-HSA-71723;R-HSA-199219;R-HSA-1655849;R-HSA-1655848;R-HSA-1655850;R-HSA-70713;R-HSA-1655844;R-HSA-5333615;R-HSA-194642;R-HSA-6801462;R-HSA-5696004;R-HSA-194641;R-HSA-163418;R-HSA-428127;R-HSA-1989758;R-HSA-1989759;R…
R-HSA-6794361	Neurexins and neuroligins	1	60	0.00429092	0.817054	0.817054	2	19	0.00161181	9606	Homo sapiens	EPB41L5		R-HSA-6797553;R-HSA-6797568
R-HSA-73887	Death Receptor Signalling	3	157	0.0112279	0.820581	0.820581	12	90	0.00763488	9606	Homo sapiens	APH1A;ADAM17;FADD		R-HSA-140978;R-HSA-193682;R-HSA-75187;R-HSA-83586;R-HSA-83650;R-HSA-141316;R-HSA-75240;R-HSA-3371385;R-HSA-75146;R-HSA-205112;R-HSA-141310;R-HSA-193679
R-HSA-6802949	Signaling by RAS mutants	1	61	0.00436244	0.822171	0.822171	7	8	0.000678656	9606	Homo sapiens	RAF1		R-HSA-6803233;R-HSA-6802926;R-HSA-6802925;R-HSA-6802924;R-HSA-6802908;R-HSA-6802922;R-HSA-6803240
R-HSA-425407	SLC-mediated transmembrane transport	9	412	0.0294643	0.823821	0.823821	7	184	0.0156091	9606	Homo sapiens	SLC5A6;SLC6A6;SLC20A2;SLC44A1;SLC44A2;SLC20A1;BSG;SLC25A22;SLC9A1		R-HSA-8875623;R-HSA-427605;R-HSA-433698;R-HSA-351987;R-HSA-444433;R-HSA-429581;R-HSA-425994
R-HSA-446193	Biosynthesis of the N-glycan precursor (dolichol lipid-linked oligosaccharide, LLO) and transfer to a nascent protein	3	159	0.011371	0.827073	0.827073	4	62	0.00525959	9606	Homo sapiens	NUS1;RFT1;ALG2		R-HSA-449718;R-HSA-446212;R-HSA-446208;R-HSA-4419978
R-HSA-5250924	B-WICH complex positively regulates rRNA expression	1	62	0.00443396	0.827146	0.827146	3	3	0.000254496	9606	Homo sapiens	SPAG1		R-HSA-5250930;R-HSA-5250947;R-HSA-5250938
R-HSA-5610780	Degradation of GLI1 by the proteasome	1	62	0.00443396	0.827146	0.827146	3	6	0.000508992	9606	Homo sapiens	NUMB		R-HSA-5610737;R-HSA-5610735;R-HSA-5610760
R-HSA-1221632	Meiotic synapsis	1	62	0.00443396	0.827146	0.827146	1	6	0.000508992	9606	Homo sapiens	SYNE1		R-HSA-912408
R-HSA-5655253	Signaling by FGFR2 in disease	1	62	0.00443396	0.827146	0.827146	1	28	0.0023753	9606	Homo sapiens	SPAG1		R-HSA-8851710
R-HSA-8939211	ESR-mediated signaling	3	160	0.0114425	0.830244	0.830244	6	72	0.00610791	9606	Homo sapiens	SPAG1;CTSD		R-HSA-9012315;R-HSA-9012319;R-HSA-9023840;R-HSA-9011971;R-HSA-9023845;R-HSA-9023846
R-HSA-112382	Formation of RNA Pol II elongation complex	1	63	0.00450547	0.831982	0.831982	2	2	0.000169664	9606	Homo sapiens	SPAG1		R-HSA-112379;R-HSA-112381
R-HSA-73777	RNA Polymerase I Chain Elongation	1	63	0.00450547	0.831982	0.831982	1	1	8.4832e-05	9606	Homo sapiens	SPAG1		R-HSA-74986
R-HSA-6811436	COPI-independent Golgi-to-ER retrograde traffic	1	63	0.00450547	0.831982	0.831982	2	7	0.000593824	9606	Homo sapiens	DYNLL2		R-HSA-8849350;R-HSA-8849353
R-HSA-163125	Post-translational modification: synthesis of GPI-anchored proteins	2	115	0.00822427	0.836201	0.836201	3	16	0.00135731	9606	Homo sapiens	MFI2;PLAUR		R-HSA-162836;R-HSA-162729;R-HSA-8940388
R-HSA-194441	Metabolism of non-coding RNA	1	64	0.00457699	0.836683	0.836683	1	6	0.000508992	9606	Homo sapiens	LYN		R-HSA-191784
R-HSA-191859	snRNP Assembly	1	64	0.00457699	0.836683	0.836683	1	6	0.000508992	9606	Homo sapiens	LYN		R-HSA-191784
R-HSA-196849	Metabolism of water-soluble vitamins and cofactors	5	252	0.0180219	0.84001	0.84001	9	140	0.0118765	9606	Homo sapiens	SLC5A6;NT5E;MTHFD2;RFT1;MUT		R-HSA-199219;R-HSA-6801462;R-HSA-8940074;R-HSA-71010;R-HSA-199206;R-HSA-6801328;R-HSA-3159259;R-HSA-8940070;R-HSA-3165230
R-HSA-5621480	Dectin-2 family	1	65	0.0046485	0.841252	0.841252	1	12	0.00101798	9606	Homo sapiens	LYN		R-HSA-5621355
R-HSA-1483166	Synthesis of PA	1	65	0.0046485	0.841252	0.841252	1	17	0.00144214	9606	Homo sapiens	AGPAT9		R-HSA-75885
R-HSA-446203	Asparagine N-linked glycosylation	9	421	0.030108	0.841836	0.841836	25	143	0.012131	9606	Homo sapiens	NUS1;STX17;GOSR2;CTSZ;RFT1;ALG2;MGAT1;DYNLL2;BET1L		R-HSA-5694423;R-HSA-446212;R-HSA-5694418;R-HSA-203973;R-HSA-446208;R-HSA-5694417;R-HSA-6809006;R-HSA-4419978;R-HSA-5694428;R-HSA-6809003;R-HSA-5694425;R-HSA-6809015;R-HSA-6809014;R-HSA-6809011;R-HSA-6809010;R-HSA-5694413;R-HSA-5694409;R-HSA-5694527;R-HSA-204008;R-HSA-5694522;R-HSA-964768;R-HSA-449718;R-HSA-5694439;R-HSA-5694446;R-HSA-5694441
R-HSA-196854	Metabolism of vitamins and cofactors	8	381	0.0272474	0.844452	0.844452	14	201	0.0170512	9606	Homo sapiens	SLC5A6;NT5E;RETSAT;MTHFD2;GPC1;RFT1;PDSS2;MUT		R-HSA-8940074;R-HSA-71010;R-HSA-8956427;R-HSA-199206;R-HSA-2404131;R-HSA-3159259;R-HSA-2423785;R-HSA-2162253;R-HSA-8940070;R-HSA-2429643;R-HSA-199219;R-HSA-6801462;R-HSA-6801328;R-HSA-3165230
R-HSA-75955	RNA Polymerase II Transcription Elongation	1	66	0.00472002	0.845694	0.845694	8	8	0.000678656	9606	Homo sapiens	SPAG1		R-HSA-112385;R-HSA-113412;R-HSA-112379;R-HSA-113402;R-HSA-112381;R-HSA-112396;R-HSA-113407;R-HSA-112383
R-HSA-6782210	Gap-filling DNA repair synthesis and ligation in TC-NER	1	66	0.00472002	0.845694	0.845694	2	2	0.000169664	9606	Homo sapiens	SPAG1		R-HSA-6782227;R-HSA-6782208
R-HSA-5693565	Recruitment and ATM-mediated phosphorylation of repair and signaling proteins at DNA double strand breaks	1	66	0.00472002	0.845694	0.845694	23	35	0.00296912	9606	Homo sapiens	MDC1		R-HSA-5682967;R-HSA-5683735;R-HSA-69891;R-HSA-5682965;R-HSA-5682992;R-HSA-5693566;R-HSA-5682588;R-HSA-5682586;R-HSA-5683384;R-HSA-5683801;R-HSA-5683385;R-HSA-5682598;R-HSA-5682983;R-HSA-5682629;R-HSA-5683077;R-HSA-5693536;R-HSA-5683425;R-HSA-5693583;R-HSA-5682607;R-HSA-5682863;R-HSA-5693551;R-HSA-5683405;R-HSA-5682858
R-HSA-8978934	Metabolism of cofactors	1	66	0.00472002	0.845694	0.845694	1	27	0.00229046	9606	Homo sapiens	PDSS2		R-HSA-2162253
R-HSA-5696398	Nucleotide Excision Repair	2	119	0.00851033	0.849913	0.849913	27	36	0.00305395	9606	Homo sapiens	CETN2;SPAG1		R-HSA-5696670;R-HSA-6781867;R-HSA-5696664;R-HSA-6790454;R-HSA-6782069;R-HSA-6782004;R-HSA-5689861;R-HSA-6782131;R-HSA-5696655;R-HSA-6782141;R-HSA-6782204;R-HSA-6781818;R-HSA-6782138;R-HSA-5690996;R-HSA-6782211;R-HSA-6781824;R-HSA-6782208;R-HSA-5691006;R-HSA-5691004;R-HSA-6781833;R-HSA-5691000;R-HSA-6790487;R-HSA-6782227;R-HSA-6781840;R-HSA-6782224;R-HSA-6782943;R-HSA-6782234
R-HSA-201722	Formation of the beta-catenin:TCF transactivating complex	1	67	0.00479153	0.850013	0.850013	13	13	0.00110282	9606	Homo sapiens	CTNNB1		R-HSA-3299569;R-HSA-4411367;R-HSA-3322422;R-HSA-3451153;R-HSA-3364026;R-HSA-3322427;R-HSA-3322424;R-HSA-4411372;R-HSA-201712;R-HSA-4411351;R-HSA-3364014;R-HSA-4411357;R-HSA-3451147
R-HSA-5678895	Defective CFTR causes cystic fibrosis	1	67	0.00479153	0.850013	0.850013	3	7	0.000593824	9606	Homo sapiens	ERLIN1		R-HSA-8866854;R-HSA-8866857;R-HSA-8866856
R-HSA-8848021	Signaling by PTK6	1	67	0.00479153	0.850013	0.850013	7	52	0.00441127	9606	Homo sapiens	EGFR		R-HSA-8848005;R-HSA-8857555;R-HSA-8857583;R-HSA-8857565;R-HSA-8857549;R-HSA-8847995;R-HSA-8857577
R-HSA-9006927	Signaling by Non-Receptor Tyrosine Kinases	1	67	0.00479153	0.850013	0.850013	7	52	0.00441127	9606	Homo sapiens	EGFR		R-HSA-8848005;R-HSA-8857555;R-HSA-8857583;R-HSA-8857565;R-HSA-8857549;R-HSA-8847995;R-HSA-8857577
R-HSA-156590	Glutathione conjugation	1	67	0.00479153	0.850013	0.850013	1	14	0.00118765	9606	Homo sapiens	GSTZ1		R-HSA-176054
R-HSA-1266738	Developmental Biology	28	1177	0.0841736	0.852005	0.852005	89	484	0.0410587	9606	Homo sapiens	RPL31;USP33;PPL;EGFR;MYL12A;APH1A;ALCAM;GPC1;CTNNA2;LYN;PRNP;YES1;ITGA2;RPL35A;RPS28;MYL6;RPS27;SPAG1;NUMB;PKP2;CTNNB1;MYH9;ITGA5;PKP3;EPHA2		R-HSA-6814695;R-HSA-5617877;R-HSA-443783;R-HSA-5617492;R-HSA-443780;R-HSA-5617874;R-HSA-3928627;R-HSA-5617887;R-HSA-445069;R-HSA-6814187;R-HSA-560517;R-HSA-3928628;R-HSA-480520;R-HSA-6810357;R-HSA-3928616;R-HSA-5617862;R-HSA-3928623;R-HSA-5617859;R-HSA-8942224;R-HSA-452894;R-HSA-5617484;R-HSA-5693644;R-HSA-374686;R-HSA-5617486;R-HSA-5617483;R-HSA-5617867;R-HSA-5617866;R-HSA-3928602;R-HSA-3928607;…
R-HSA-2672351	Stimuli-sensing channels	2	120	0.00858185	0.853174	0.853174	2	24	0.00203597	9606	Homo sapiens	CLCN3;RAF1		R-HSA-2731002;R-HSA-2682349
R-HSA-6782135	Dual incision in TC-NER	1	68	0.00486305	0.85421	0.85421	6	6	0.000508992	9606	Homo sapiens	SPAG1		R-HSA-6782211;R-HSA-6782131;R-HSA-6782224;R-HSA-6782141;R-HSA-6782204;R-HSA-6782138
R-HSA-6802952	Signaling by BRAF and RAF fusions	1	68	0.00486305	0.85421	0.85421	2	5	0.00042416	9606	Homo sapiens	RAF1		R-HSA-6802934;R-HSA-6802927
R-HSA-8956321	Nucleotide salvage	1	68	0.00486305	0.85421	0.85421	1	21	0.00178147	9606	Homo sapiens	DGUOK		R-HSA-74207
R-HSA-352230	Amino acid transport across the plasma membrane	1	68	0.00486305	0.85421	0.85421	1	36	0.00305395	9606	Homo sapiens	SLC6A6		R-HSA-351987
R-HSA-375165	NCAM signaling for neurite out-growth	1	69	0.00493456	0.858291	0.858291	1	23	0.00195114	9606	Homo sapiens	PRNP		R-HSA-375154
R-HSA-196071	Metabolism of steroid hormones	1	69	0.00493456	0.858291	0.858291	1	37	0.00313879	9606	Homo sapiens	STARD3		R-HSA-196126
R-HSA-162906	HIV Infection	5	260	0.018594	0.858642	0.858642	92	158	0.0134035	9606	Homo sapiens	SPAG1;HMGA1;PPIF;HLA-A;B2M		R-HSA-8951690;R-HSA-182279;R-HSA-175108;R-HSA-182795;R-HSA-3159227;R-HSA-182286;R-HSA-180622;R-HSA-167181;R-HSA-175117;R-HSA-175250;R-HSA-180627;R-HSA-180630;R-HSA-167191;R-HSA-164503;R-HSA-164500;R-HSA-180634;R-HSA-164507;R-HSA-167192;R-HSA-164504;R-HSA-180632;R-HSA-164505;R-HSA-164510;R-HSA-162590;R-HSA-167196;R-HSA-164508;R-HSA-167197;R-HSA-164509;R-HSA-9613490;R-HSA-164514;R-HSA-167459;R-HSA-…
R-HSA-8878171	Transcriptional regulation by RUNX1	5	261	0.0186655	0.860838	0.860838	4	132	0.0111978	9606	Homo sapiens	TJP1;CTSL;PML		R-HSA-8935960;R-HSA-8938108;R-HSA-8935972;R-HSA-8938887
R-HSA-168325	Viral Messenger RNA Synthesis	1	70	0.00500608	0.862257	0.862257	1	7	0.000593824	9606	Homo sapiens	SPAG1		R-HSA-168326
R-HSA-3371497	HSP90 chaperone cycle for steroid hormone receptors (SHR)	1	70	0.00500608	0.862257	0.862257	1	12	0.00101798	9606	Homo sapiens	DYNLL2		R-HSA-5618080
R-HSA-936837	Ion transport by P-type ATPases	1	71	0.00507759	0.866113	0.866113	1	14	0.00118765	9606	Homo sapiens	ATP1B3		R-HSA-936897
R-HSA-2559586	DNA Damage/Telomere Stress Induced Senescence	1	71	0.00507759	0.866113	0.866113	1	18	0.00152698	9606	Homo sapiens	HMGA1		R-HSA-4647594
R-HSA-5690714	CD22 mediated BCR regulation	1	72	0.00514911	0.869861	0.869861	1	4	0.000339328	9606	Homo sapiens	LYN		R-HSA-5690702
R-HSA-5358346	Hedgehog ligand biogenesis	1	72	0.00514911	0.869861	0.869861	1	15	0.00127248	9606	Homo sapiens	ADAM17		R-HSA-5362793
R-HSA-5362517	Signaling by Retinoic Acid	1	72	0.00514911	0.869861	0.869861	1	21	0.00178147	9606	Homo sapiens	RDH14		R-HSA-5419165
R-HSA-156584	Cytosolic sulfonation of small molecules	1	72	0.00514911	0.869861	0.869861	1	24	0.00203597	9606	Homo sapiens	IMPAD1		R-HSA-8953499
R-HSA-162587	HIV Life Cycle	3	175	0.0125152	0.872118	0.872118	83	115	0.00975568	9606	Homo sapiens	SPAG1;HMGA1;PPIF		R-HSA-8951690;R-HSA-175108;R-HSA-182795;R-HSA-3159227;R-HSA-167181;R-HSA-175117;R-HSA-175250;R-HSA-167191;R-HSA-164503;R-HSA-164500;R-HSA-164507;R-HSA-167192;R-HSA-164504;R-HSA-164505;R-HSA-164510;R-HSA-162590;R-HSA-167196;R-HSA-164508;R-HSA-167197;R-HSA-164509;R-HSA-9613490;R-HSA-164514;R-HSA-167459;R-HSA-164515;R-HSA-167072;R-HSA-164512;R-HSA-164513;R-HSA-164519;R-HSA-167076;R-HSA-167077;R-HSA-…
R-HSA-1793185	Chondroitin sulfate/dermatan sulfate metabolism	1	73	0.00522063	0.873505	0.873505	4	24	0.00203597	9606	Homo sapiens	GPC1		R-HSA-1889981;R-HSA-1889978;R-HSA-1878002;R-HSA-1889955
R-HSA-5693606	DNA Double Strand Break Response	1	74	0.00529214	0.877046	0.877046	23	44	0.00373261	9606	Homo sapiens	MDC1		R-HSA-5682967;R-HSA-5683735;R-HSA-69891;R-HSA-5682965;R-HSA-5682992;R-HSA-5693566;R-HSA-5682588;R-HSA-5682586;R-HSA-5683384;R-HSA-5683801;R-HSA-5683385;R-HSA-5682598;R-HSA-5682983;R-HSA-5682629;R-HSA-5683077;R-HSA-5693536;R-HSA-5683425;R-HSA-5693583;R-HSA-5682607;R-HSA-5682863;R-HSA-5693551;R-HSA-5683405;R-HSA-5682858
R-HSA-74259	Purine catabolism	1	74	0.00529214	0.877046	0.877046	1	28	0.0023753	9606	Homo sapiens	NT5E		R-HSA-109278
R-HSA-8950505	Gene and protein expression by JAK-STAT signaling after Interleukin-12 stimulation	1	74	0.00529214	0.877046	0.877046	1	36	0.00305395	9606	Homo sapiens	PPIF		R-HSA-8950328
R-HSA-3108232	SUMO E3 ligases SUMOylate target proteins	3	178	0.0127297	0.879308	0.879308	8	130	0.0110282	9606	Homo sapiens	MDC1;CETN2;PML		R-HSA-3000383;R-HSA-5228508;R-HSA-3000411;R-HSA-4570463;R-HSA-3000433;R-HSA-4570553;R-HSA-3000434;R-HSA-4570554
R-HSA-9006931	Signaling by Nuclear Receptors	4	230	0.0164485	0.889945	0.889945	7	93	0.00788938	9606	Homo sapiens	SPAG1;RDH14;CTSD		R-HSA-9012315;R-HSA-9012319;R-HSA-9023840;R-HSA-9011971;R-HSA-9023845;R-HSA-9023846;R-HSA-5419165
R-HSA-5578749	Transcriptional regulation by small RNAs	1	79	0.00564972	0.893325	0.893325	1	5	0.00042416	9606	Homo sapiens	SPAG1		R-HSA-5578742
R-HSA-1632852	Macroautophagy	1	79	0.00564972	0.893325	0.893325	4	39	0.00330845	9606	Homo sapiens	DYNLL2		R-HSA-1632857;R-HSA-1632843;R-HSA-5678315;R-HSA-5678313
R-HSA-1445148	Translocation of SLC2A4 (GLUT4) to the plasma membrane	1	79	0.00564972	0.893325	0.893325	1	15	0.00127248	9606	Homo sapiens	MYH9		R-HSA-2316352
R-HSA-3000178	ECM proteoglycans	1	79	0.00564972	0.893325	0.893325	1	23	0.00195114	9606	Homo sapiens	ITGA2		R-HSA-2681667
R-HSA-69620	Cell Cycle Checkpoints	5	279	0.0199528	0.895732	0.895732	7	57	0.00483543	9606	Homo sapiens	MDC1;PPP1CC;RPS27;PKMYT1;DYNLL2		R-HSA-5683735;R-HSA-69891;R-HSA-141409;R-HSA-141431;R-HSA-170055;R-HSA-141422;R-HSA-141439
R-HSA-5250913	Positive epigenetic regulation of rRNA expression	1	80	0.00572123	0.896313	0.896313	3	7	0.000593824	9606	Homo sapiens	SPAG1		R-HSA-5250930;R-HSA-5250947;R-HSA-5250938
R-HSA-4086398	Ca2+ pathway	1	80	0.00572123	0.896313	0.896313	3	27	0.00229046	9606	Homo sapiens	CTNNB1		R-HSA-8944362;R-HSA-4411383;R-HSA-4411365
R-HSA-204998	Cell death signalling via NRAGE, NRIF and NADE	1	80	0.00572123	0.896313	0.896313	1	17	0.00144214	9606	Homo sapiens	APH1A		R-HSA-205112
R-HSA-5663084	Diseases of carbohydrate metabolism	1	80	0.00572123	0.896313	0.896313	1	44	0.00373261	9606	Homo sapiens	GALNS		R-HSA-2263490
R-HSA-2990846	SUMOylation	3	187	0.0133734	0.898771	0.898771	8	139	0.0117917	9606	Homo sapiens	MDC1;CETN2;PML		R-HSA-3000383;R-HSA-5228508;R-HSA-3000411;R-HSA-4570463;R-HSA-3000433;R-HSA-4570553;R-HSA-3000434;R-HSA-4570554
R-HSA-167172	Transcription of the HIV genome	1	81	0.00579275	0.899217	0.899217	46	47	0.00398711	9606	Homo sapiens	SPAG1		R-HSA-167111;R-HSA-167115;R-HSA-167113;R-HSA-167118;R-HSA-167181;R-HSA-167117;R-HSA-170706;R-HSA-170704;R-HSA-167121;R-HSA-167191;R-HSA-167130;R-HSA-167192;R-HSA-167128;R-HSA-167134;R-HSA-167196;R-HSA-167197;R-HSA-167133;R-HSA-9613490;R-HSA-167459;R-HSA-167072;R-HSA-167136;R-HSA-167076;R-HSA-167077;R-HSA-9613498;R-HSA-167147;R-HSA-167083;R-HSA-167150;R-HSA-167087;R-HSA-167148;R-HSA-167084;R-HSA-1…
R-HSA-69473	G2/M DNA damage checkpoint	1	81	0.00579275	0.899217	0.899217	2	12	0.00101798	9606	Homo sapiens	MDC1		R-HSA-5683735;R-HSA-69891
R-HSA-114608	Platelet degranulation	2	137	0.00979761	0.899561	0.899561	2	11	0.000933152	9606	Homo sapiens	LGALS3BP;CANT1;PPIF		R-HSA-482775;R-HSA-481009
R-HSA-983705	Signaling by the B Cell Receptor (BCR)	3	190	0.0135879	0.904603	0.904603	9	43	0.00364778	9606	Homo sapiens	LYN;STIM1;PPIF		R-HSA-9606163;R-HSA-983709;R-HSA-2025882;R-HSA-5690702;R-HSA-2089943;R-HSA-2089927;R-HSA-434798;R-HSA-1168376;R-HSA-434700
R-HSA-1169408	ISG15 antiviral mechanism	1	83	0.00593578	0.904785	0.904785	16	16	0.00135731	9606	Homo sapiens	ISG15		R-HSA-1678841;R-HSA-936462;R-HSA-1169395;R-HSA-1678843;R-HSA-1169394;R-HSA-1678842;R-HSA-1169397;R-HSA-1169399;R-HSA-1169398;R-HSA-1169307;R-HSA-1176059;R-HSA-1169403;R-HSA-1169402;R-HSA-1169405;R-HSA-1169404;R-HSA-1169406
R-HSA-73854	RNA Polymerase I Promoter Clearance	1	83	0.00593578	0.904785	0.904785	4	9	0.000763488	9606	Homo sapiens	SPAG1		R-HSA-73865;R-HSA-73769;R-HSA-73757;R-HSA-73758
R-HSA-383280	Nuclear Receptor transcription pathway	1	84	0.00600729	0.907453	0.907453	1	1	8.4832e-05	9606	Homo sapiens	NR2C2		R-HSA-376419
R-HSA-427413	NoRC negatively regulates rRNA expression	1	84	0.00600729	0.907453	0.907453	1	7	0.000593824	9606	Homo sapiens	SPAG1		R-HSA-427366
R-HSA-397014	Muscle contraction	4	240	0.0171637	0.90792	0.90792	8	39	0.00330845	9606	Homo sapiens	MYL6;STIM1;ATP1B3;MYL12A		R-HSA-445700;R-HSA-445813;R-HSA-445699;R-HSA-2089943;R-HSA-434798;R-HSA-445704;R-HSA-445705;R-HSA-936897
R-HSA-6781827	Transcription-Coupled Nucleotide Excision Repair (TC-NER)	1	85	0.00607881	0.910046	0.910046	16	16	0.00135731	9606	Homo sapiens	SPAG1		R-HSA-6782211;R-HSA-6781824;R-HSA-6782208;R-HSA-6781867;R-HSA-6781833;R-HSA-6782069;R-HSA-6782004;R-HSA-6782131;R-HSA-6782227;R-HSA-6781840;R-HSA-6782224;R-HSA-6782141;R-HSA-6782204;R-HSA-6781818;R-HSA-6782138;R-HSA-6782234
R-HSA-9020591	Interleukin-12 signaling	1	85	0.00607881	0.910046	0.910046	1	56	0.00475059	9606	Homo sapiens	PPIF		R-HSA-8950328
[truncated: 127 more rows]

## Sheet: URA
© 2000-2018 QIAGEN. All rights reserved.
Upstream Regulator	Molecule Type	p-value of overlap	Target molecules in dataset	Mechanistic Network
[truncated: 396 more rows]

## Sheet: Downregulated canonical pathway
© 2000-2018 QIAGEN. All rights reserved.
[truncated: 364 more rows]
